# Supplementary material for: Can cheese mites, maggots and molds enhance bioactivity? Peptidomic investigation of functional peptides in four traditional cheeses
Source: Royal Society of Chemistry journal article supplement (doi:10.1039/d0fo02439b), 2020-12-21
Supplement: d0fo02439b1.pdf [file d0fo02439b1.pdf]

**Supplementary Table S13.** Complete list of bioactive peptides identified in the four cheeses. For each peptide, the sequence and species name corresponds to the peptide studied in the referenced articles from the literature.

| Peptide                         | Species      | Function                                                                                         | Casu Marzu | Mimolette | Stilton | Taleggio | Ref.            |
|---------------------------------|--------------|--------------------------------------------------------------------------------------------------|------------|-----------|---------|----------|-----------------|
| $\beta$ -lactoglobulin(41-56)   | Bos taurus   | Antimicrobial                                                                                    |            | x         | x       |          | 114             |
| $\beta$ -lactoglobulin(155-164) | Bos taurus   | stimulates splenocyte proliferation                                                              |            | x         |         |          | 115             |
| $\alpha$ s2-casein(96-104)      | Bos taurus   | ACE-inhibitory                                                                                   | x          | x         | x       | x        | 116             |
| $\alpha$ s2-casein(96-106)      | Bos taurus   | ACE-inhibitory                                                                                   | x          | x         |         |          | 116             |
| $\beta$ -lactoglobulin(158-164) | Bos taurus   | ACE-inhibitory, reduced vasoconstrictorendothelin-1 release, stimulates splenocyte proliferation | x          | x         |         |          | 115,117-119     |
| $\alpha$ s2-casein(204-212)     | Bos taurus   | ACE-inhibitory                                                                                   |            | x         |         | x        | 120             |
| $\beta$ -casein(192-198)        | Bos taurus   | ACE-inhibitory, antimicrobial, antioxidant                                                       |            | x         |         |          | 121-125         |
| $\beta$ -lactoglobulin(49-58)   | Bos taurus   | ACE-inhibitory                                                                                   | x          | x         |         |          | 126,127         |
| $\alpha$ s1-casein(172-179)     | Bos taurus   | ACE-inhibitory                                                                                   |            | x         | x       |          | 122             |
| $\beta$ -casein(199-217)        | Bos taurus   | Anti-inflammatory                                                                                | x          |           |         |          | 103             |
| $\beta$ -casein(115-122)        | Bos taurus   | Antimicrobial                                                                                    |            | x         |         |          | 124             |
| $\beta$ -casein(123-128)        | Bos taurus   | ACE-inhibitory, antimicrobial, bradykinin-potentiating, increases MUC4 expression                |            |           |         | x        | 122,124,128,129 |
| $\beta$ -casein(137-144)        | Homo sapiens | ACE-inhibitory                                                                                   |            |           |         | x        | 130             |
| $\beta$ -casein(146-155)        | Bos taurus   | ACE-inhibitory                                                                                   |            |           |         | x        | 131             |
| $\beta$ -casein(210-219)        | Bos taurus   | Cytomodulatory                                                                                   |            | x         | x       | x        | 132             |
| $\beta$ -casein(210-221)        | Bos taurus   | ACE-inhibitory                                                                                   | x          | x         | x       | x        | 133             |
| $\alpha$ s2-casein(189-196)     | Bos taurus   | ACE-inhibitory, antioxidant                                                                      |            | x         |         | x        | 116,134         |
| $\alpha$ s1-casein(38-49)       | Bos taurus   | ACE-inhibitory                                                                                   |            | x         |         |          | 116,117,135     |
| $\alpha$ s1-casein(43-49)       | Bos taurus   | ACE-inhibitory                                                                                   |            | x         |         | x        | 136             |
| $\beta$ -casein(77-83)          | Bos taurus   | DPP-IV inhibitory                                                                                |            | x         |         |          | 137             |
| $\alpha$ s1-casein(39-48)       | Bos taurus   | ACE-inhibitory                                                                                   |            | x         |         | x        | 131             |
| $\alpha$ s1-casein(185-214)     | Bos taurus   | ACE-inhibitory                                                                                   |            | x         | x       | x        | 138             |
| $\beta$ -casein(109-120)        | Capra hircus | ACE-inhibitory                                                                                   | x          |           |         |          | 139             |
| $\beta$ -casein(109-121)        | Capra hircus | ACE-inhibitory                                                                                   | x          |           |         |          | 139             |

| Peptide                         | Species         | Function                                                                                                                                         | Casu Marzu | Mimolette | Stilton | Taleggio | Ref.        |
|---------------------------------|-----------------|--------------------------------------------------------------------------------------------------------------------------------------------------|------------|-----------|---------|----------|-------------|
| $\beta$ -casein(109-138)        | Bos taurus      | Increases MUC2 expression, increases small intestinal goblet cell density, increases mMuc4 expression, opioid, promotes intestinal wound healing |            | x         |         | x        | 129,140,141 |
| $\alpha$ s1-casein(95-117)      | Bos taurus      | Antimicrobial                                                                                                                                    |            | x         |         | x        | 142         |
| $\alpha$ s1-casein(95-118)      | Bos taurus      | Antimicrobial                                                                                                                                    |            |           |         | x        | 142         |
| $\alpha$ s1-casein(95-120)      | Bos taurus      | Antimicrobial                                                                                                                                    |            |           |         | x        | 142         |
| $\beta$ -casein(121-128)        | Bos taurus      | Antimicrobial                                                                                                                                    | x          | x         | x       | x        | 124         |
| $\kappa$ -casein(119-126)       | Ovis aries      | ACE-inhibitory                                                                                                                                   | x          | x         | x       | x        | 143,144     |
| $\beta$ -lactoglobulin(100-107) | Bos taurus      | Antimicrobial, stimulates splenocyte proliferation                                                                                               | x          |           |         |          | 115,145,146 |
| $\alpha$ s1-casein(201-212)     | Bos taurus      | ACE-inhibitory                                                                                                                                   |            | x         |         | x        | 133         |
| $\beta$ -casein(64-71)          | Bos taurus      | PEP-inhibitory, prolyl endopeptidase-inhibitory                                                                                                  |            | x         |         | x        | 147,148     |
| $\beta$ -lactoglobulin(89-100)  | Capra hircus    | Antimicrobial                                                                                                                                    | x          | x         |         |          | 149         |
| $\beta$ -lactoglobulin(19-26)   | Capra hircus    | Antimicrobial                                                                                                                                    | x          |           |         |          | 149         |
| $\beta$ -lactoglobulin(114-122) | Bos taurus      | DPP-IV Inhibitory                                                                                                                                |            | x         |         |          | 150,151     |
| $\kappa$ -casein(72-81)         | Capra hircus    | DPP-IV Inhibitory                                                                                                                                | x          | x         |         |          | 152         |
| $\alpha$ s2-casein(209-220)     | Bos taurus      | Antimicrobial                                                                                                                                    |            | x         |         | x        | 123         |
| $\alpha$ s2-casein(119-128)     | Bos taurus      | Antimicrobial                                                                                                                                    | x          | x         | x       | x        | 142         |
| $\alpha$ s2-casein(203-208)     | Bos taurus      | Antimicrobial                                                                                                                                    |            |           | x       |          | 123         |
| $\alpha$ s2-casein(203-217)     | Bos taurus      | Antimicrobial                                                                                                                                    |            | x         |         |          | 153         |
| $\alpha$ s2-casein(203-222)     | Bos taurus      | Antimicrobial                                                                                                                                    |            | x         |         |          | 153         |
| $\beta$ -casein(184-189)        | Bos taurus      | ACE-inhibitory                                                                                                                                   |            |           |         | x        | 154         |
| $\beta$ -casein(184-190)        | Bos taurus      | ACE-inhibitory                                                                                                                                   | x          | x         | x       | x        | 120         |
| $\beta$ -casein(184-191)        | Bos taurus      | Antioxidant                                                                                                                                      | x          | x         | x       | x        | 125         |
| $\beta$ -lactoglobulin(48-56)   | Bos taurus      | ACE-inhibitory                                                                                                                                   |            | x         |         |          | 155         |
| $\beta$ -lactoglobulin(28-37)   | Bubalus bubalis | ACE-inhibitory                                                                                                                                   |            |           | x       |          | 156         |
| $\alpha$ s1-casein(110-119)     | Bos taurus      | Antimicrobial                                                                                                                                    |            | x         |         | x        | 142         |
| $\alpha$ s1-casein(107-116)     | Bos taurus      | Antimicrobial                                                                                                                                    | x          | x         | x       | x        | 142         |
| $\beta$ -casein(206-224)        | Bos taurus      | ACE-inhibitory                                                                                                                                   |            | x         | x       | x        | 138         |
| $\beta$ -casein(150-155)        | Bos taurus      | DPP-IV Inhibitory                                                                                                                                |            | x         | x       | x        | 157         |

| Peptide                         | Species         | Function                         | Casu Marzu  | Mimolette        | Stilton        | Taleggio        | Ref.        |
|---------------------------------|-----------------|----------------------------------|-------------|------------------|----------------|-----------------|-------------|
| $\beta$ -casein(85-112)         | Bos taurus      | ACE-inhibitory                   |             |                  | x              |                 | 138         |
| $\alpha$ s1-casein(114-124)     | Bos taurus      | Antimicrobial                    |             | x                |                |                 | 158,159     |
| $\beta$ -casein(73-81)          | Bubalus bubalis | ACE-inhibitory                   |             | x                |                | x               | 160,161     |
| $\beta$ -casein(73-82)          | Bos taurus      | ACE-inhibitory                   |             | x                |                |                 | 162         |
| $\beta$ -casein(73-87)          | Bos taurus      | ACE-inhibitory                   |             | x                |                | x               | 163         |
| $\beta$ -casein(73-83)          | Capra hircus    | ACE-inhibitory                   | x           |                  |                |                 | 139         |
| $\beta$ -casein(159-166)        | Capra hircus    | Antimicrobial, DPP-IV Inhibitory | x           |                  |                |                 | 149,152     |
| $\alpha$ s2-casein(205-212)     | Bos taurus      | ACE-inhibitory                   |             | x                |                | x               | 120         |
| $\beta$ -casein(124-133)        | Bos taurus      | ACE-inhibitory                   | x           | x                | x              | x               | 133         |
| $\beta$ -casein(88-97)          | Bos taurus      | ACE-inhibitory                   |             | x                |                | x               | 164         |
| $\beta$ -casein(147-155)        | Bos taurus      | ACE-inhibitory                   |             | x                |                |                 | 131         |
| $\beta$ -casein(173-190)        | Bos taurus      | ACE-inhibitory                   |             |                  | x              |                 | 138         |
| $\beta$ -casein(96-106)         | Capra hircus    | Antimicrobial                    | x           | x                | x              | x               | 149         |
| $\beta$ -casein(209-224)        | Bos taurus      | ACE-inhibitory                   |             | x                | x              | x               | 165         |
| $\alpha$ s2-casein(94-103)      | Bos taurus      | Antimicrobial                    |             | x                | x              |                 | 166         |
| $\beta$ -casein(198-205)        | Bos taurus      | ACE-inhibitory                   | x           | x                | x              | x               | 138         |
| $\beta$ -casein(16-40)          | Bos taurus      | Caseinophosphopeptide            |             | x                |                |                 | 167         |
| $\alpha$ s1-casein(37-55)       | Bos taurus      | induces macedocin biosynthesis   |             | x                |                |                 | 168         |
| $\alpha$ s1-casein(16-24)       | Bos taurus      | ACE-inhibitory                   |             | x                |                | x               | 4           |
| $\alpha$ s1-casein(16-38)       | Bos taurus      | Antimicrobial                    |             | x                | x              | x               | 169,170     |
| $\alpha$ s1-casein(16-39)       | Bos taurus      | Antimicrobial                    |             | x                |                | x               | 142         |
| $\alpha$ s1-casein(195-208)     | Bos taurus      | Antimicrobial                    |             | x                | x              | x               | 171         |
| $\beta$ -casein(183-190)        | Bos taurus      | ACE-inhibitory                   |             | x                | x              |                 | 138         |
| $\beta$ -lactoglobulin(39-50)   | Capra hircus    | Antimicrobial                    |             | x                |                |                 | 149         |
| $\beta$ -casein(181-190)        | Bos taurus      | ACE-inhibitory                   |             | x                | x              | x               | 133         |
| $\beta$ -casein(56-67)          | Capra hircus    | Antimicrobial                    | x           | x                |                | x               | 149         |
| $\alpha$ s2-casein(163-176)     | Bos taurus      | Antimicrobial                    | x           | x                |                | x               | 166         |
| $\alpha$ s2-casein(213-222)     | Bos taurus      | Antimicrobial                    |             | x                |                | x               | 153         |
| $\beta$ -lactoglobulin(141-151) | Bos taurus      | Antimicrobial, DPP-IV Inhibitory |             | x                |                | x               | 145,172,173 |
| <b>Peptide</b>                  | <b>Species</b>  | <b>Function</b>                  | <b>Casu</b> | <b>Mimolette</b> | <b>Stilton</b> | <b>Taleggio</b> | <b>Ref.</b> |

|                                 |                |                                                 | <b>Marzu</b>      |                  |                |                 |                 |
|---------------------------------|----------------|-------------------------------------------------|-------------------|------------------|----------------|-----------------|-----------------|
| $\beta$ -casein(95-105)         | Bos taurus     | ACE-inhibitory                                  | x                 | x                | x              | x               | 174             |
| $\beta$ -casein(93-106)         | Bos taurus     | Antioxidant                                     | x                 | x                | x              | x               | 175             |
| $\alpha$ s2-casein(197-222)     | Bos taurus     | Antimicrobial                                   |                   | x                |                |                 | 142             |
| $\beta$ -lactoglobulin(61-73)   | Capra hircus   | Antimicrobial                                   | x                 |                  |                |                 | 149             |
| $\beta$ -casein(145-155)        | Bos taurus     | ACE-inhibitory                                  |                   | x                | x              |                 | 131             |
| $\beta$ -casein(113-120)        | Bos taurus     | Antimicrobial, antioxidant                      |                   | x                |                | x               | 124,125         |
| $\beta$ -lactoglobulin(110-116) | Bos taurus     | ACE-inhibitory                                  | x                 |                  |                |                 | 155             |
| $\beta$ -casein(212-221)        | Bos taurus     | ACE-inhibitory                                  |                   | x                |                | x               | 176,177         |
| $\alpha$ s1-casein(30-37)       | Bos taurus     | Antimicrobial                                   |                   | x                |                |                 | 171,178,179     |
| $\beta$ -casein(185-191)        | Bos taurus     | ACE-inhibitory, antimicrobial, antioxidant      | x                 |                  | x              | x               | 124,180,181     |
| $\beta$ -casein(185-198)        | Bos taurus     | Antimicrobial                                   |                   | x                | x              | x               | 124             |
| $\beta$ -lactoglobulin(108-116) | Bos taurus     | Antimicrobial, DPP-IV Inhibitory                | x                 | x                |                |                 | 114,149,172     |
| $\alpha$ s1-casein(101-107)     | Ovis aries     | ACE-inhibitory                                  |                   | x                |                | x               | 182             |
| $\beta$ -casein(193-206)        | Bos taurus     | Antimicrobial                                   |                   | x                | x              | x               | 142             |
| $\beta$ -casein(216-224)        | Bos taurus     | ACE-inhibitory                                  |                   | x                |                |                 | 176,177         |
| $\beta$ -casein(74-82)          | Bos taurus     | PEP-inhibitory, prolyl endopeptidase-inhibitory |                   | x                |                | x               | 147             |
| $\beta$ -casein(74-83)          | Bos taurus     | ACE-inhibitory, antioxidant                     |                   | x                |                | x               | 183             |
| $\alpha$ s2-casein(198-222)     | Bos taurus     | Antimicrobial                                   |                   | x                |                |                 | 153,158,184-186 |
| $\beta$ -lactoglobulin(57-76)   | Bos taurus     | Hypocholesterolemic                             |                   | x                |                |                 | 3               |
| $\kappa$ -casein(46-55)         | Bos taurus     | C3a Receptors agonist, opioid                   | x                 |                  |                |                 | 187-189         |
| $\alpha$ s1-casein(106-115)     | Bos taurus     | Anxiolytic                                      | x                 | x                | x              | x               | 190             |
| $\beta$ -casein(75-83)          | Bos taurus     | ACE-inhibitory, DPP-IV Inhibitory               |                   | x                | x              | x               | 4,137           |
| $\kappa$ -casein(56-62)         | Bos taurus     | Opioid                                          | x                 | x                | x              |                 | 148             |
| $\kappa$ -casein(56-63)         | Bos taurus     | Opioid                                          | x                 |                  | x              |                 | 189             |
| $\beta$ -casein(129-136)        | Bos taurus     | Bradykinin-Potentiating                         | x                 | x                |                | x               | 128             |
| $\beta$ -casein(206-213)        | Ovis aries     | ACE-inhibitory, antioxidant                     |                   | x                | x              | x               | 191             |
| $\beta$ -casein(208-217)        | Bos taurus     | ACE-inhibitory                                  | x                 | x                | x              | x               | 165             |
| $\beta$ -casein(206-216)        | Ovis aries     | ACE-inhibitory                                  | x                 | x                | x              | x               | 192             |
| $\beta$ -casein(206-220)        | Capra hircus   | Antimicrobial                                   | x                 | x                | x              | x               | 149,170         |
| <b>Peptide</b>                  | <b>Species</b> | <b>Function</b>                                 | <b>Casu Marzu</b> | <b>Mimolette</b> | <b>Stilton</b> | <b>Taleggio</b> | <b>Ref.</b>     |

|                            |              |                                                               |   |   |   |   |                |
|----------------------------|--------------|---------------------------------------------------------------|---|---|---|---|----------------|
| $\beta$ -casein(208-224)   | Bos taurus   | ACE-inhibitory, Antimicrobial, antithrombin, immunomodulatory |   | x | x | x | 87,138,170,193 |
| $\alpha$ 2-casein(105-111) | Capra hircus | ACE-inhibitory, antioxidant                                   | x | x | x | x | 191,194        |

## References

- 114 A. Pellegrini, C. Dettling, U. Thomas and P. Hunziker, Isolation and characterization of four bactericidal domains in the bovine  $\beta$ -lactoglobulin, *Biochim. Biophys. Acta BBA - Gen. Subj.*, 2001, **1526**, 131–140.
- 115 A. Jacquot, S. F. Gauthier, R. Drouin and Y. Boutin, Proliferative effects of synthetic peptides from  $\beta$ -lactoglobulin and  $\alpha$ -lactalbumin on murine splenocytes, *Int. Dairy J.*, 2010, **20**, 514–521.
- 116 J. Tauzin, L. Miclo and J.-L. Gaillard, Angiotensin-I-converting enzyme inhibitory peptides from tryptic hydrolysate of bovine  $\alpha_{s2}$ -casein, *FEBS Lett.*, 2002, **531**, 369–374.
- 117 A. Yamada, T. Sakurai, D. Ochi, E. Mitsuyama, K. Yamauchi and F. Abe, Antihypertensive effect of the bovine casein-derived peptide Met-Lys-Pro, *Food Chem.*, 2015, **172**, 441–446.
- 118 M. M. Mullally, H. Meisel and R. J. FitzGerald, Identification of a novel angiotensin-I-converting enzyme inhibitory peptide corresponding to a tryptic fragment of bovine  $\beta$ -lactoglobulin, *FEBS Lett.*, 1997, **402**, 99–101.
- 119 W. Maes, J. Van Camp, V. Vermeirssen, M. Hemeryck, J. M. Ketelslegers, J. Schrezenmeir, P. Van Oostveldt and A. Huyghebaert, Influence of the lactokinin Ala-Leu-Pro-Met-His-Ile-Arg (ALPMHIR) on the release of endothelin-1 by endothelial cells, *Regul. Pept.*, 2004, **118**, 105–109.
- 120 M. Maeno, N. Yamamoto and T. Takano, Identification of an antihypertensive peptide from casein hydrolysate produced by a proteinase from *Lactobacillus helveticus* CP790, *J. Dairy Sci.*, 1996, **79**, 1316–1321.
- 121 S. Maruyama, K. Nakagomi, N. Tomizuka and H. Suzuki, Angiotensin I-converting enzyme inhibitor derived from an enzymatic hydrolysate of casein. II. Isolation and bradykinin-potentiating activity on the uterus and the ileum of rats, *Agric. Biol. Chem.*, 1985, **49**, 1405–1409.
- 122 A. Pihlanto-Leppälä, T. Rokka and H. Korhonen, Angiotensin I converting enzyme inhibitory peptides derived from bovine milk proteins, *Int. Dairy J.*, 1998, **8**, 325–331.
- 123 H. A. Elbarbary, A. M. Abdou, Y. Nakamura, E. Y. Park, H. A. Mohamed and K. Sato, Identification of novel antibacterial peptides isolated from a commercially available casein hydrolysate by autofocusing technique, *BioFactors*, 2012, **38**, 309–315.
- 124 M. Sedaghati, H. Ezzatpanah, M. M. A. Boojar, M. T. Ebrahimi and F. Kobarfard, Isolation and identification of some antibacterial peptides in the plasmin-digest of  $\beta$ -casein, *LWT-Food Sci. Technol.*, 2016, **68**, 217–225.
- 125 S. G. Rival, C. G. Boeriu and H. J. Wichers, Caseins and casein hydrolysates. 2. Antioxidative properties and relevance to lipoxygenase inhibition, *J. Agric. Food Chem.*, 2001, **49**, 295–302.
- 126 T. Tavares, M. del M. Contreras, M. Amorim, M. Pintado, I. Recio and F. X. Malcata, Novel whey-derived peptides with inhibitory effect against angiotensin-converting enzyme: *In vitro* effect and stability to gastrointestinal enzymes, *Peptides*, 2011, **32**, 1013–1019.
- 127 T. G. Tavares and F. Xavier Malcata, The Portuguese Paradox: Why do some inhabitants of Portugal appear to live so long when their diet is based on whey cheese?, *Food Chem.*, 2012, **131**, 727–729.
- 128 E. A. Perpetuo, L. Juliano and I. Lebrun, Biochemical and pharmacological aspects of two bradykinin-potentiating peptides obtained from tryptic hydrolysis of casein, *J. Protein Chem.*, 2003, **22**, 601–606.
- 129 P. Plaisancié, R. Boutrou, M. Estienne, G. Henry, J. Jardin, A. Paquet and J. Léonil,  $\beta$ -Casein(94-123)-derived peptides differently modulate production of mucins in intestinal goblet cells, *J. Dairy Res.*, 2015, **82**, 36–46.
- 130 M. Kohmura, N. Nio, K. Kubo, Y. Minoshima, E. Munekata and Y. Ariyoshi, Inhibition of angiotensin-converting enzyme by synthetic peptides of human  $\beta$ -casein, *Agric. Biol. Chem.*, 1989, **53**, 2107–2114.
- 131 M.-C. Robert, A. Razaname, M. Mutter and M. A. Juillerat, Identification of angiotensin-I-converting enzyme inhibitory peptides derived from sodium caseinate hydrolysates produced by *Lactobacillus helveticus* NCC 2765, *J. Agric. Food Chem.*, 2004, **52**, 6923–6931.
- 132 H. Zhao, F. Zhou, L. Wang, B. Fengling, P. Dziugan, P. Walczak and B. Zhang, Characterization of a bioactive peptide with cytomodulatory effect released from casein, *Eur. Food Res. Technol.*, 2014, **238**, 315–322.

- 133 M. Hayes, C. Stanton, H. Slattery, O. O'Sullivan, C. Hill, G. F. Fitzgerald and R. P. Ross, Casein fermentate of *Lactobacillus animalis* DPC6134 contains a range of novel propeptide angiotensin-converting enzyme inhibitors, *Appl. Environ. Microbiol.*, 2007, **73**, 4658–4667.
- 134 I. López-Expósito, A. Quirós, L. Amigo and I. Recio, Casein hydrolysates as a source of antimicrobial, antioxidant and antihypertensive peptides, *Le Lait*, 2007, **87**, 241–249.
- 135 S. Maruyama and H. Suzuki, A peptide inhibitor of angiotensin I converting enzyme in the tryptic hydrolysate of casein, *Agric. Biol. Chem.*, 1982, **46**, 1393–1394.
- 136 S. Maruyama, H. Mitachi, H. Tanaka, N. Tomizuka and H. Suzuki, Studies on the active site and antihypertensive activity of angiotensin I-converting enzyme inhibitors derived from casein, *Agric. Biol. Chem.*, 1987, **51**, 1581–1586.
- 137 H. Uenishi, T. Kabuki, Y. Seto, A. Serizawa and H. Nakajima, Isolation and identification of casein-derived dipeptidyl-peptidase 4 (DPP-4)-inhibitory peptide LPQNIPPL from gouda-type cheese and its effect on plasma glucose in rats, *Int. Dairy J.*, 2012, **22**, 24–30.
- 138 N. Yamamoto, A. Akino and T. Takano, Antihypertensive effect of the peptides derived from casein by an extracellular proteinase from *Lactobacillus helveticus* CP790, *J. Dairy Sci.*, 1994, **77**, 917–922.
- 139 A. Quirós, B. Hernández-Ledesma, M. Ramos, L. Amigo and I. Recio, Angiotensin-converting enzyme inhibitory activity of peptides derived from caprine kefir, *J. Dairy Sci.*, 2005, **88**, 3480–3487.
- 140 P. Plaisancié, J. Claustre, M. Estienne, G. Henry, R. Boutrou, A. Paquet and J. Léonil, A novel bioactive peptide from yoghurts modulates expression of the gel-forming MUC2 mucin as well as population of goblet cells and Paneth cells along the small intestine, *J. Nutr. Biochem.*, 2013, **24**, 213–221.
- 141 C. Bessette, B. Benoit, S. Sekkal, J. Bruno, M. Estienne, J. Léonil, L. Ferrier, V. Théodorou and P. Plaisancié, Protective effects of  $\beta$ -casofensin, a bioactive peptide from bovine  $\beta$ -casein, against indomethacin-induced intestinal lesions in rats, *Mol. Nutr. Food Res.*, 2016, **60**, 823–833.
- 142 Y. Liu, J. Eichler and M. Pischetsrieder, Virtual screening of a milk peptide database for the identification of food-derived antimicrobial peptides, *Mol. Nutr. Food Res.*, 2015, **59**, 2243–2254.
- 143 M. Miguel, J. Á. Gómez-Ruiz, I. Recio and A. Aleixandre, Changes in arterial blood pressure after single oral administration of milk-casein-derived peptides in spontaneously hypertensive rats, *Mol. Nutr. Food Res.*, 2010, **54**, 1422–1427.
- 144 J. Á. Gómez-Ruiz, M. Ramos and I. Recio, Identification of novel angiotensin-converting enzyme-inhibitory peptides from ovine milk proteins by CE-MS and chromatographic techniques, *Electrophoresis*, 2007, **28**, 4202–4211.
- 145 V. Demers-Mathieu, S. F. Gauthier, M. Britten, I. Fliss, G. Robitaille and J. Jean, Antibacterial activity of peptides extracted from tryptic hydrolyzate of whey protein by nanofiltration, *Int. Dairy J.*, 2013, **28**, 94–101.
- 146 M. Sedaghati, H. Ezzatpanah, M. M. Boojar, M. T. Ebrahimi and M. Aminafshar, Plasmin-digest of  $\beta$ -lactoglobulin with antibacterial properties, *Food Agric. Immunol.*, 2015, **26**, 218–230.
- 147 M. Asano, N. Nio and Y. Ariyoshi, Inhibition of prolyl endopeptidase by synthetic  $\beta$ -casein peptides and their derivatives with a C-terminal prolinol or prolinol, *Biosci. Biotechnol. Biochem.*, 1992, **56**, 976–977.
- 148 H. Meisel, H. Frister and E. Schlimme, Biologically active peptides in milk proteins, *Z. Für Ernährungswissenschaft*, 1989, **28**, 267–278.
- 149 H. Almaas, E. Eriksen, C. Sekse, I. Comi, R. Flengsrud, H. Holm, E. Jensen, M. Jacobsen, T. Langsrud and G. E. Vegarud, Antibacterial peptides derived from caprine whey proteins, by digestion with human gastrointestinal juice, *Br. J. Nutr.*, 2011, **106**, 896–905.
- 150 I. M. E. Lacroix and E. C. Y. Li-Chan, Isolation and characterization of peptides with dipeptidyl peptidase-IV inhibitory activity from pepsin-treated bovine whey proteins, *Peptides*, 2014, **54**, 39–48.
- 151 A. B. Nongonierma, S. Paoletta, P. Mudgil, S. Maqsood and R. J. FitzGerald, Identification of novel dipeptidyl peptidase IV (DPP-IV) inhibitory peptides in camel milk protein hydrolysates, *Food Chem.*, 2018, **244**, 340–348.

- 152 Y. Zhang, R. Chen, H. Ma and S. Chen, Isolation and identification of dipeptidyl peptidase IV-inhibitory peptides from trypsin/chymotrypsin-treated goat milk casein hydrolysates by 2D-TLC and LC-MS/MS, *J. Agric. Food Chem.*, 2015, **63**, 8819–8828.
- 153 A. Alvarez-Ordóñez, M. Begley, T. Clifford, T. Deasy, K. Considine and C. Hill, Structure-activity relationship of synthetic variants of the milk-derived antimicrobial peptide  $\alpha_{s2}$ -casein f(183-207), *Appl. Environ. Microbiol.*, 2013, AEM.01394-13.
- 154 D. Liu, H. Sun, L. Zhang, S. Li and Z. Qin, High-Level Expression of milk-derived antihypertensive peptide in *Escherichia coli* and its bioactivity, *J. Agric. Food Chem.*, 2007, **55**, 5109–5112.
- 155 A. Pihlanto-Leppälä, P. Koskinen, K. Piilola, T. Tupasela and H. Korhonen, Angiotensin I-converting enzyme inhibitory properties of whey protein digests: Concentration and characterization of active peptides, *J. Dairy Res.*, 2000, **67**, 53–64.
- 156 I. M. E. Lacroix, G. Meng, I. W. Y. Cheung and E. C. Y. Li-Chan, Do whey protein-derived peptides have dual dipeptidyl-peptidase IV and angiotensin I-converting enzyme inhibitory activities?, *J. Funct. Foods*, 2016, **21**, 87–96.
- 157 A. B. Nongonierma and R. J. FitzGerald, Structure activity relationship modelling of milk protein-derived peptides with dipeptidyl peptidase IV (DPP-IV) inhibitory activity, *Peptides*, 2016, **79**, 1–7.
- 158 K. B. McCann, B. J. Shiell, W. P. Michalski, A. Lee, J. Wan, H. Roginski and M. J. Coventry, Isolation and characterisation of a novel antibacterial peptide from bovine  $\alpha_{s1}$ -casein, *Int. Dairy J.*, 2006, **16**, 316–323.
- 159 W. Tang, H. Yuan, H. Zhang, L. Wang, H. Qian and X. Qi, An antimicrobial peptide screened from casein hydrolyzate by *Saccharomyces cerevisiae* cell membrane affinity method, *Food Control*, 2015, **50**, 413–422.
- 160 F. Minervini, F. Algaron, C. G. Rizzello, P. F. Fox, V. Monnet and M. Gobbetti, Angiotensin I-converting-enzyme-inhibitory and antibacterial peptides from *Lactobacillus helveticus* PR4 proteinase-hydrolyzed caseins of milk from six species, *Appl. Environ. Microbiol.*, 2003, **69**, 5297–5305.
- 161 J. Otte, Samah. M. A. Shalaby, M. Zakora and M. S. Nielsen, Fractionation and identification of ACE-inhibitory peptides from  $\alpha$ -lactalbumin and  $\beta$ -casein produced by thermolysin-catalysed hydrolysis, *Int. Dairy J.*, 2007, **17**, 1460–1472.
- 162 A. Pihlanto, T. Virtanen and H. Korhonen, Angiotensin I converting enzyme (ACE) inhibitory activity and antihypertensive effect of fermented milk, *Int. Dairy J.*, 2010, **20**, 3–10.
- 163 E. Smacchi and M. Gobbetti, Peptides from several Italian cheeses inhibitory to proteolytic enzymes of lactic acid bacteria, *Pseudomonas fluorescens* ATCC 948 and to the angiotensin I-converting enzyme, *Enzyme Microb. Technol.*, 1998, **22**, 687–694.
- 164 M. Gobbetti, P. Ferranti, E. Smacchi, F. Goffredi and F. Addeo, Production of angiotensin-I-converting-enzyme-inhibitory peptides in fermented milks started by *Lactobacillus delbrueckii* subsp. *bulgaricus* SS1 and *Lactococcus lactis* subsp. *cremoris* FT4, *Appl. Environ. Microbiol.*, 2000, **66**, 3898–3904.
- 165 Y. Lu, S. Govindasamy-Lucey and J. A. Lucey, Angiotensin-I-converting enzyme-inhibitory peptides in commercial Wisconsin Cheddar cheeses of different ages, *J. Dairy Sci.*, 2016, **99**, 41–52.
- 166 S. Sistla, Structure–activity relationships of  $\alpha_s$ -casein peptides with multifunctional biological activities, *Mol. Cell. Biochem.*, 2013, **384**, 29–38.
- 167 R. J. FitzGerald, Potential uses of caseinophosphopeptides, *Int. Dairy J.*, 1998, **8**, 451–457.
- 168 M. Georgalaki, M. Papadelli, E. Chassioti, R. Anastasiou, A. Aktypis, L. D. Vuyst, G. V. Driessche, B. Devreese and E. Tsakalidou, Milk protein fragments induce the biosynthesis of macedocin, the lantibiotic produced by *Streptococcus macedonicus* ACA-DC 198, *Appl. Environ. Microbiol.*, 2010, **76**, 1143–1151.
- 169 E. Lahov and W. Regelson, Antibacterial and immunostimulating casein-derived substances from milk: caseicidin, isracidin peptides, *Food Chem. Toxicol.*, 1996, **34**, 131–145.
- 170 G. A. Birkemo, O. O’Sullivan, R. P. Ross and C. Hill, Antimicrobial activity of two peptides caseicidin 15 and 17, found naturally in bovine colostrum, *J. Appl. Microbiol.*, 2009, **106**, 233–240.

- 171 M. Hayes, R. P. Ross, G. F. Fitzgerald, C. Hill and C. Stanton, Casein-derived antimicrobial peptides generated by *Lactobacillus acidophilus* DPC6026, *Appl. Environ. Microbiol.*, 2006, **72**, 2260–2264.
- 172 S. T. Silveira, D. Martínez-Maqueda, I. Recio and B. Hernández-Ledesma, Dipeptidyl peptidase-IV inhibitory peptides generated by tryptic hydrolysis of a whey protein concentrate rich in  $\beta$ -lactoglobulin, *Food Chem.*, 2013, **141**, 1072–1077.
- 173 O. Power, A. Fernández, R. Norris, F. A. Riera and R. J. FitzGerald, Selective enrichment of bioactive properties during ultrafiltration of a tryptic digest of  $\beta$ -lactoglobulin, *J. Funct. Foods*, 2014, **9**, 38–47.
- 174 A. Abubakar, T. Saito, H. Kitazawa, Y. Kawai and T. Itoh, Structural analysis of new antihypertensive peptides derived from cheese whey protein by proteinase K digestion, *J. Dairy Sci.*, 1998, **81**, 3131–3138.
- 175 K. H. Sabeena Farvin, C. P. Baron, N. S. Nielsen and C. Jacobsen, Antioxidant activity of yoghurt peptides: Part 1-*in vitro* assays and evaluation in  $\omega$ -3 enriched milk, *Food Chem.*, 2010, **123**, 1081–1089.
- 176 A. Quirós, M. Ramos, B. Muguerza, M. A. Delgado, M. Miguel, A. Aleixandre and I. Recio, Identification of novel antihypertensive peptides in milk fermented with *Enterococcus faecalis*, *Int. Dairy J.*, 2007, **17**, 33–41.
- 177 M. Miguel, I. Recio, M. Ramos, M. A. Delgado and M. A. Aleixandre, Antihypertensive effect of peptides obtained from *Enterococcus faecalis*-fermented milk in rats, *J. Dairy Sci.*, 2006, **89**, 3352–3359.
- 178 R. M. Kent, C. M. Guinane, P. M. O’Connor, G. F. Fitzgerald, C. Hill, C. Stanton and R. P. Ross, Production of the antimicrobial peptides Caseicin A and B by *Bacillus* isolates growing on sodium caseinate, *Lett. Appl. Microbiol.*, 2012, **55**, 141–148.
- 179 S. Norberg, P. M. O. Connor, C. Stanton, R. P. Ross, C. Hill, G. F. Fitzgerald and P. D. Cotter, Extensive manipulation of caseicin A and B highlighting the tolerance of these antimicrobial peptides to change, *Appl. Environ. Microbiol.*, 2012, AEM.07312-11.
- 180 R. Vij, S. Reddi, S. Kapila and R. Kapila, Transepithelial transport of milk derived bioactive peptide VLPVPQK, *Food Chem.*, 2016, **190**, 681–688.
- 181 V. P. Shanmugam, S. Kapila, T. K. Sonfack and R. Kapila, Antioxidative peptide derived from enzymatic digestion of buffalo casein, *Int. Dairy J.*, 2015, **42**, 1–5.
- 182 J. A. G. Ruiz, M. Ramos and I. Recio, Angiotensin converting enzyme-inhibitory activity of peptides isolated from Manchego cheese. Stability under simulated gastrointestinal digestion, *Int. Dairy J.*, 2004, **14**, 1075–1080.
- 183 T. Eisele, T. Stressler, B. Kranz and L. Fischer, Bioactive peptides generated in an enzyme membrane reactor using *Bacillus lentus* alkaline peptidase, *Eur. Food Res. Technol.*, 2013, **236**, 483–490.
- 184 I. Recio and S. Visser, Identification of two distinct antibacterial domains within the sequence of bovine  $\alpha_{s2}$ -casein, *Biochim. Biophys. Acta BBA-Gen. Subj.*, 1999, **1428**, 314–326.
- 185 I. López-Expósito, L. Amigo and I. Recio, Identification of the initial binding sites of  $\alpha_{s2}$ -casein f(183–207) and effect on bacterial membranes and cell morphology, *Biochim. Biophys. Acta BBA-Biomembr.*, 2008, **1778**, 2444–2449.
- 186 I. López-Expósito, A. Pellegrini, L. Amigo and I. Recio, Synergistic effect between different milk-derived peptides and proteins, *J. Dairy Sci.*, 2008, **91**, 2184–2189.
- 187 M. Takahashi, S. Moriguchi, H. Suganuma, A. Shiota, F. Tani, H. Usui, K. Kurahashi, R. Sasaki and M. Yoshikawa, Identification of casoxin C, an ileum-contracting peptide derived from bovine  $\kappa$ -casein, as an agonist for C3a receptors, *Peptides*, 1997, **18**, 329–336.
- 188 E. Sienkiewicz-Szłapka, B. Jarmołowska, S. Krawczuk, E. Kostyra, H. Kostyra and M. Iwan, Contents of agonistic and antagonistic opioid peptides in different cheese varieties, *Int. Dairy J.*, 2009, **19**, 258–263.
- 189 H. Chiba, F. Tani and M. Yoshikawa, Opioid antagonist peptides derived from  $\kappa$ -casein, *J. Dairy Res.*, 1989, **56**, 363–366.

- 190 Y. Wada and B. Lönnerdal, Bioactive peptides released by *in vitro* digestion of standard and hydrolyzed infant formulas, *Peptides*, 2015, **73**, 101–105.
- 191 S. V. Silva, A. Pihlanto and F. X. Malcata, Bioactive peptides in ovine and caprine cheeselike systems prepared with proteases from *Cynara cardunculus*, *J. Dairy Sci.*, 2006, **89**, 3336–3344.
- 192 I. Sagardia, I. Iloro, F. Elortza and C. Bald, Quantitative structure–activity relationship based screening of bioactive peptides identified in ripened cheese, *Int. Dairy J.*, 2013, **33**, 184–190.
- 193 R. Rojas-Ronquillo, A. Cruz-Guerrero, A. Flores-Nájera, G. Rodríguez-Serrano, L. Gómez-Ruiz, J. P. Reyes-Grajeda, J. Jiménez-Guzmán and M. García-Garibay, Antithrombotic and angiotensin-converting enzyme inhibitory properties of peptides released from bovine casein by *Lactobacillus casei* Shirota, *Int. Dairy J.*, 2012, **26**, 147–154.
- 194 M. del M. Contreras, D. Sanchez, M. Á. Sevilla, I. Recio and L. Amigo, Resistance of casein-derived bioactive peptides to simulated gastrointestinal digestion, *Int. Dairy J.*, 2013, **32**, 71–78.
