# Supplementary material for: Can cheese mites, maggots and molds enhance bioactivity? Peptidomic investigation of functional peptides in four traditional cheeses
Source: Royal Society of Chemistry journal article supplement (doi:10.1039/d0fo02439b), 2020-12-21
Supplement: d0fo02439b2.pdf [file d0fo02439b2.pdf]

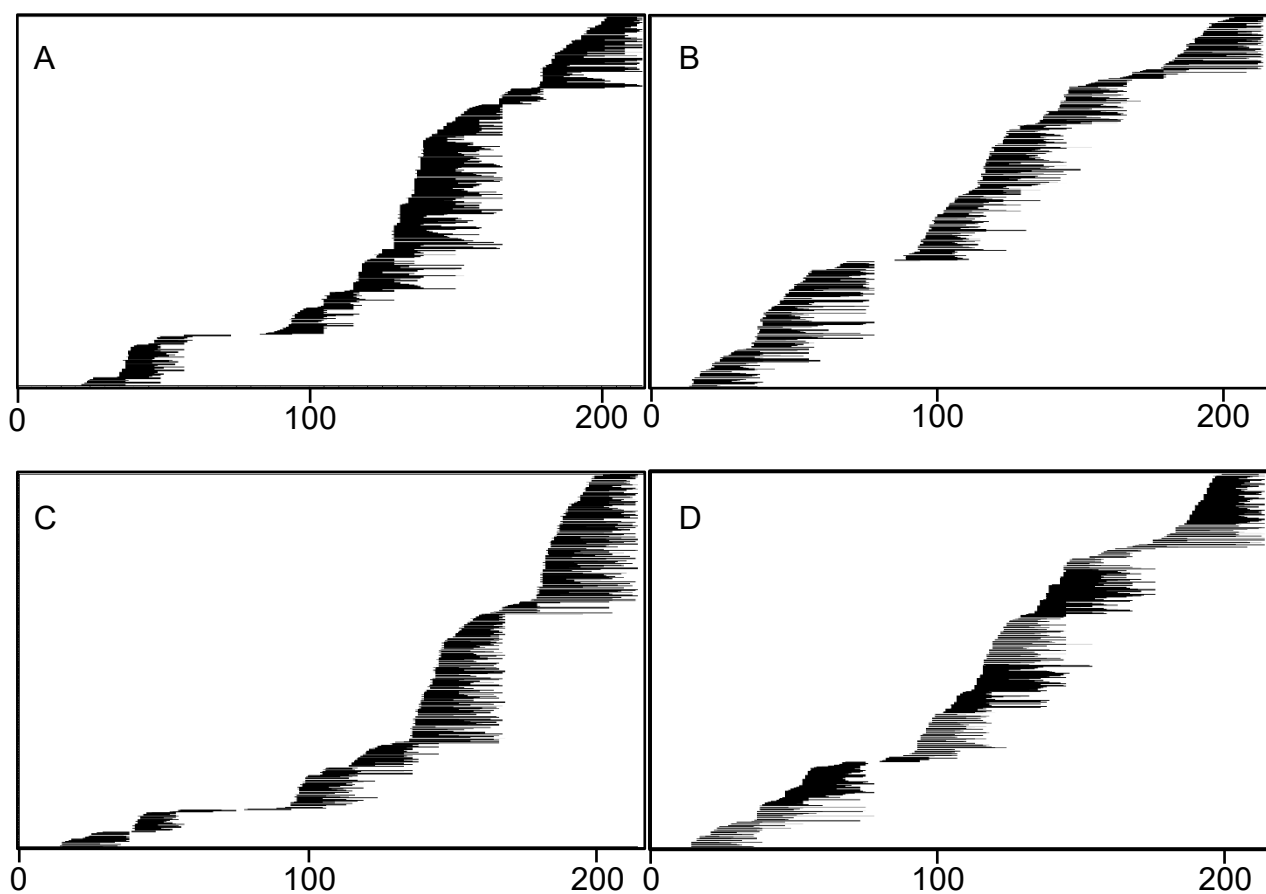

**Supplementary Figure S1.** Peptides derived from  $\alpha_{s1}$ -casein mapped onto the protein sequence. Amino acid position numbers in the intact protein are given on the x-axes. A, Casu Marzu; B, Mimolette; C, Stilton; D, Taleggio.

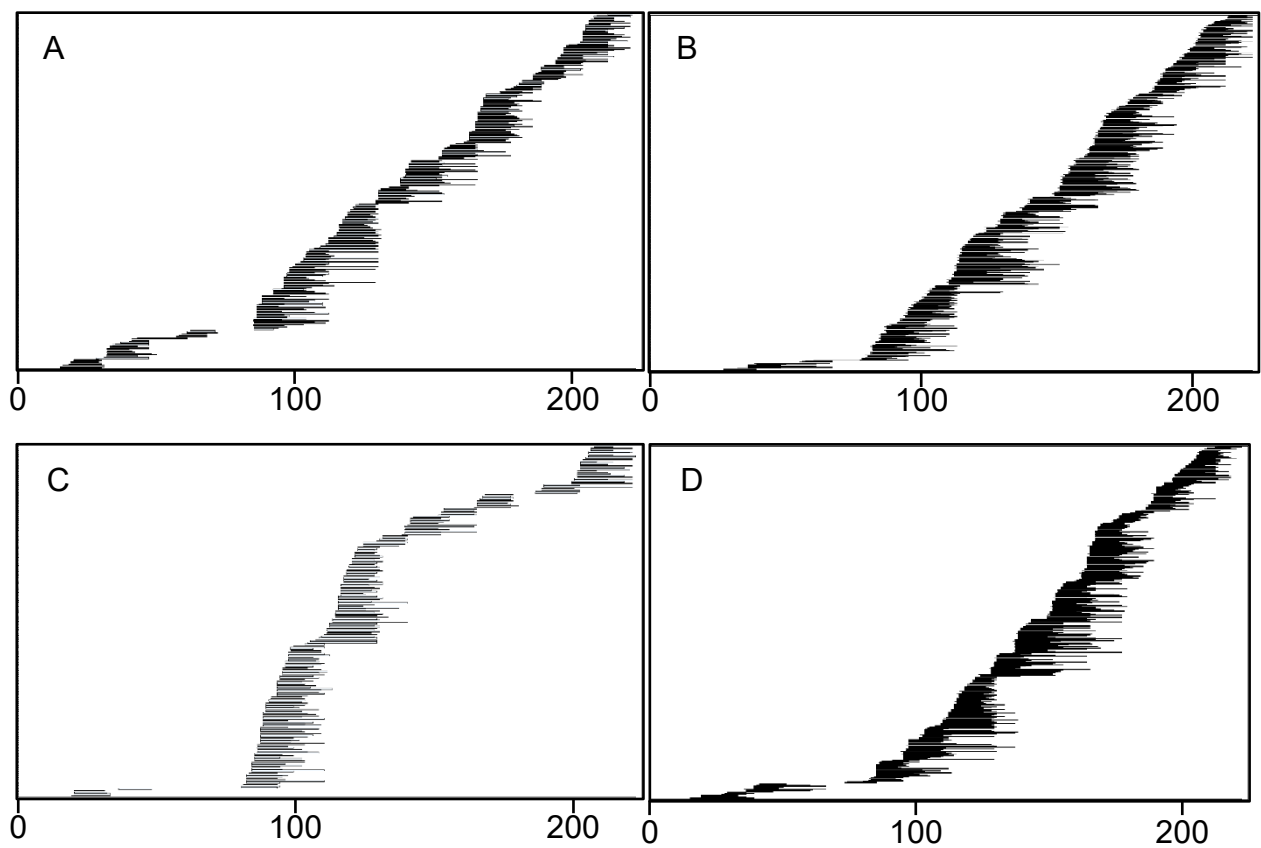

**Supplementary Figure S2.** Peptides derived from  $\alpha_{s2}$ -casein mapped onto the protein sequence. Amino acid position numbers in the intact protein are given on the x-axes. A, Casu Marzu; B, Mimolette; C, Stilton; D, Taleggio.

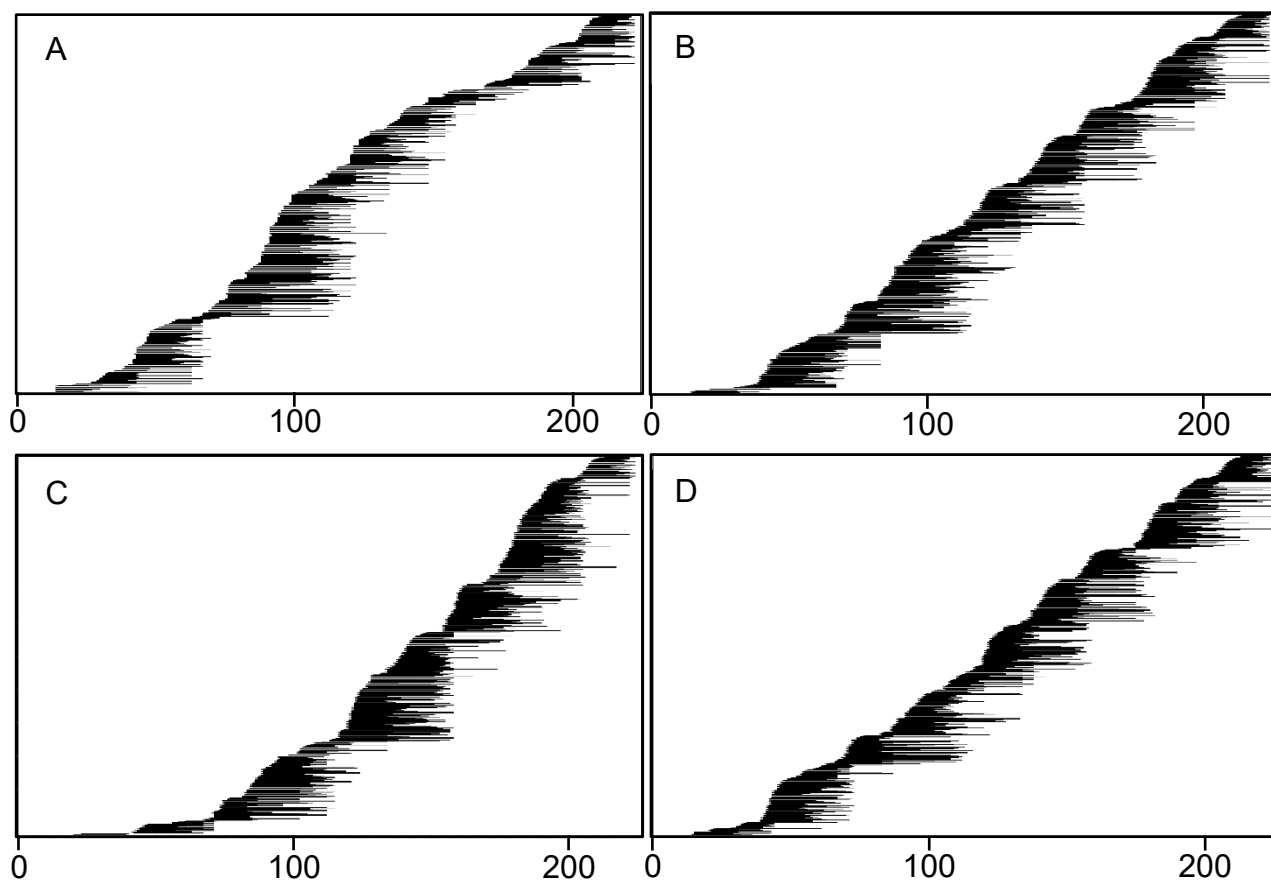

**Supplementary Figure S3.** Peptides derived from  $\beta$ -casein mapped onto the protein sequence. Amino acid position numbers in the intact protein are given on the x-axes. A, Casu Marzu; B, Mimolette; C, Stilton; D, Taleggio.

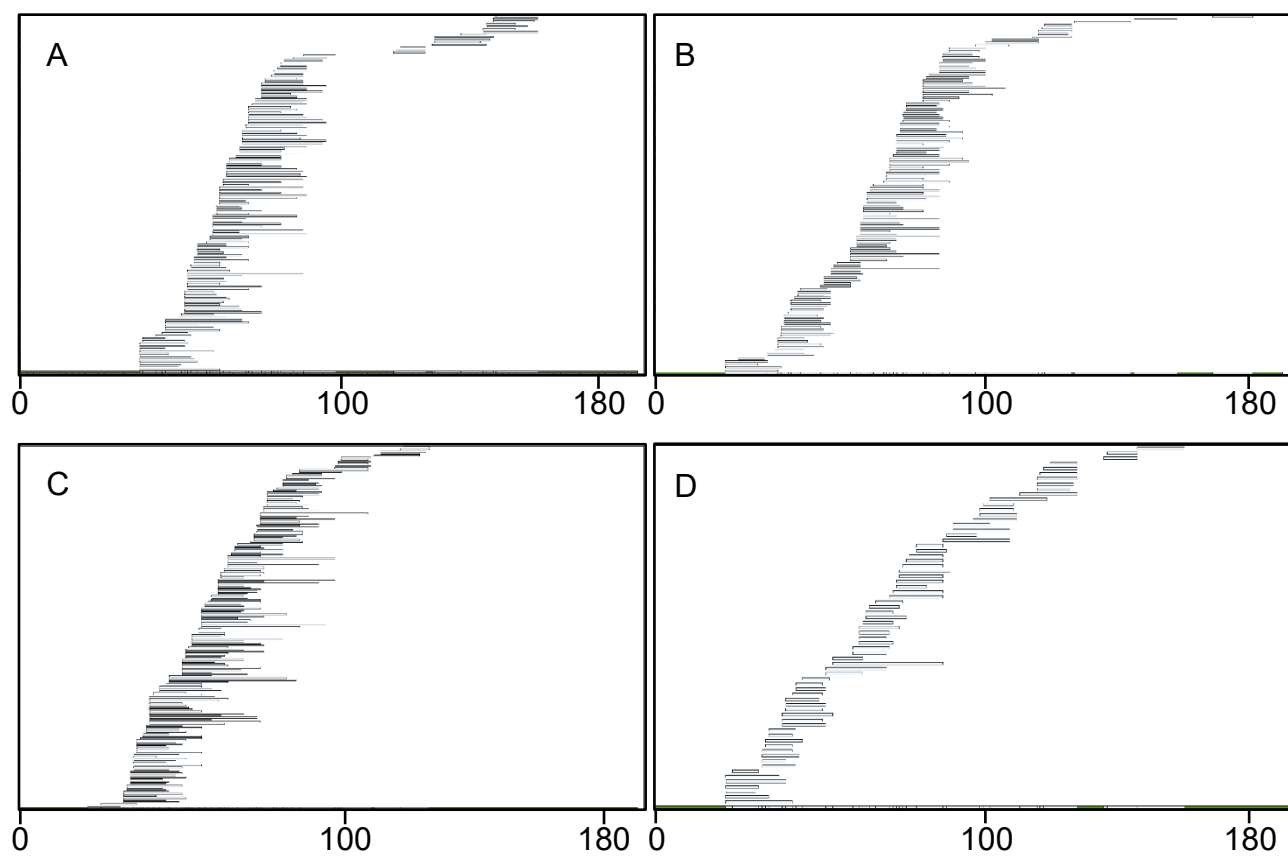

**Supplementary Figure S4.** Peptides derived from  $\kappa$ -casein mapped onto the protein sequence. Amino acid position numbers in the intact protein are given on the x-axes. A, Casu Marzu; B, Mimolette; C, Stilton; D, Taleggio.
