# Supplementary material for: Can cheese mites, maggots and molds enhance bioactivity? Peptidomic investigation of functional peptides in four traditional cheeses
Source: Royal Society of Chemistry journal article supplement (doi:10.1039/d0fo02439b), 2020-12-21
Supplement: d0fo02439b3.xlsx [file d0fo02439b3.xlsx]

## Sheet: Table S1 Taleggio all peptides
Table S1. All peptide sequences identified in Taleggio cheese.
Peptide sequence	Acetylations	Phosphorylations	Oxidations	Dehydrations	Ammonia loss	Deamidation	Protein	Start position	End position
AAAAAAAAAAAAAAAAAAAA	0	0	0	0	0	0	tr|E1BME7|E1BME7_BOVIN	242	261
AAAAAAAAAAAAAAAAAAAAGGLAAAGGPG	0	0	0	0	0	0	tr|E1BME7|E1BME7_BOVIN	242	271
AAAAAAAAAAAAAAAAAAAGGLAAAG	0	0	0	0	0	0	tr|E1BME7|E1BME7_BOVIN	243	268
AAAAAAAAAAAAAAAAAAATTGPQGLHLLFERPRPPPFLGP	0	1	0	0	0	0	tr|A4FV80|A4FV80_BOVIN	224	264
AAAAAAAAAAAAAAAAAAATTGPQGLHLLFERPRPPPFLGPSPP	0	1	0	0	0	0	tr|A4FV80|A4FV80_BOVIN	224	267
AAAAAAAAAAAAAAAAAAGGLAAAGGPG	0	0	0	0	0	0	tr|E1BME7|E1BME7_BOVIN	244	271
AAAAAAAAAAAAAAAAAATTGPQGLHLLFERPR	0	0	0	0	0	1	tr|A4FV80|A4FV80_BOVIN	225	257
AAAAAAAAAAAAAAAAALGHPQHHAPVCTA	0	0	0	0	0	0	tr|G3N3S1|G3N3S1_BOVIN	147	176
AAAAAAAAAAAAAAAAATTGPQGLHLLFERPRPPPFLGP	0	1	0	0	0	0	tr|A4FV80|A4FV80_BOVIN	226	264
AAAAAAAAAAAAAAAALGHPQHHAPVCT	0	0	0	0	0	0	tr|G3N3S1|G3N3S1_BOVIN	148	175
AAAAAAAAAAAAAAAATTGPQGLHLLFERPR	0	0	0	0	0	1	tr|A4FV80|A4FV80_BOVIN	227	257
AAAAAAAAAAAAAAAGGLAAAG	0	0	0	0	0	0	tr|E1BME7|E1BME7_BOVIN	247	268
AAAAAAAAAAAAAAAIFPGGVPAA	0	0	0	0	0	0	tr|F1ME54|F1ME54_BOVIN	165	188
AAAAAAAAAAAAAAAQCRSPRCAAERRGFRRE	0	0	0	0	0	0	tr|G3N278|G3N278_BOVIN	9	40
AAAAAAAAAAAAAAATTGPQGLHLLFERPRPPPFLGPSPP	0	1	0	0	0	0	tr|A4FV80|A4FV80_BOVIN	228	267
AAAAAAAAAAAAAAAVPRLRPPH	0	0	0	0	0	0	tr|E1BAC1|E1BAC1_BOVIN	53	75
AAAAAAAAAAAAAAQDGALYKLPAGLAPLPFP	0	0	0	0	0	0	tr|F1N1U5|F1N1U5_BOVIN	144	175
AAAAAAAAAAAAAATTGPQGLHLLFERPR	0	0	0	0	0	1	tr|A4FV80|A4FV80_BOVIN	229	257
AAAAAAAAAAAAASSPAGLLAGLPRFSSLSPPPPPPGLYFSPS	0	1	0	0	0	0	tr|E1BNQ7|E1BNQ7_BOVIN	136	178
AAAAAAAAAAAAIFPGGVPAARPPYP	0	0	0	0	0	0	tr|F1ME54|F1ME54_BOVIN	168	193
AAAAAAAAAAAAKGALEGAAGFALSQVGDLAFPRFEIPAQ	0	0	0	0	0	0	tr|F1MXD3|F1MXD3_BOVIN	50	89
AAAAAAAAAAAAKGALEGAAGFALSQVGDLAFPRFEIPAQ	0	0	0	0	0	1	tr|F1MXD3|F1MXD3_BOVIN	50	89
AAAAAAAAAAAASSPAGLLAGLPRFSSLSPPPPPPGLY	0	0	0	0	0	0	tr|E1BNQ7|E1BNQ7_BOVIN	137	174
AAAAAAAAAAAASVGGTIPGPGPGGGQGPGEGGERRTARGG	0	0	0	0	0	1	tr|F1N2W4|F1N2W4_BOVIN	631	671
AAAAAAAAAALQYPYAL	0	0	0	0	0	0	tr|E1BIV1|E1BIV1_BOVIN	291	307
AAAAAAAAAASSPAGLLAGLPRFSSLSPPPPPPGLY	0	0	0	0	0	0	tr|E1BNQ7|E1BNQ7_BOVIN	139	174
AAAAKAAKIGAGGVGALG	0	0	0	0	0	0	sp|P04985|ELN_BOVIN	441	458
AAAKAAKAASTSTPTKGN	0	0	0	0	0	0	sp|E1BB52|CDK13_BOVIN	483	500
AAKAAAKAAQFGLALLAFAGLGP	0	0	0	0	0	1	sp|P04985-6|ELN_BOVIN	453	475
AAKAAAKAAQFGLGGVGGLG	0	0	0	0	0	1	sp|P04985|ELN_BOVIN	643	662
AAKAAAKAAQFGLGGVGGLG	0	0	0	0	0	0	sp|P04985|ELN_BOVIN	643	662
AAKAAAKAAQFGLGGVGGLGV	0	0	0	0	0	1	sp|P04985|ELN_BOVIN	643	663
AAKAAAKAAQFGLGP	0	0	0	0	0	1	tr|F1N0H9|F1N0H9_BOVIN	485	499
AAKAAAKAAQFGLGPGVGVAP	0	0	0	0	0	0	sp|P04985|ELN_BOVIN	487	507
AAKAAAKAAQFGVSPA	0	1	0	0	0	0	sp|P04985-7|ELN_BOVIN	609	624
AAKAAAKAAQFGVSPAAA	0	0	0	0	0	1	sp|P04985-7|ELN_BOVIN	609	626
AEPRQGP	0	0	0	0	0	0	tr|E1BCW8|E1BCW8_BOVIN	501	507
AFLLYQEPVL	0	0	0	0	0	0	sp|P02666|CASB_BOVIN	204	213
AFLLYQEPVLGPVRGP	0	0	0	0	0	0	sp|P02666|CASB_BOVIN	204	219
AFLLYQEPVLGPVRGPFPIIV	0	0	0	0	0	0	sp|P02666|CASB_BOVIN	204	224
AINPSKENL	0	1	0	0	0	0	sp|P02663|CASA2_BOVIN	42	50
AINPSKENL	0	0	0	0	0	0	sp|P02663|CASA2_BOVIN	42	50
AINPSKENLC	0	0	0	0	0	0	sp|P02663|CASA2_BOVIN	42	51
AKAAAKAAKFGARGAVGIGGIP	0	0	0	0	0	0	sp|P04985-7|ELN_BOVIN	365	386
ALNEINQFY	0	0	0	0	0	0	sp|P02663|CASA2_BOVIN	96	104
ALNEINQFYQ	0	0	0	0	0	0	sp|P02663|CASA2_BOVIN	96	105
ALNEINQFYQKFPQ	0	0	0	0	0	0	sp|P02663|CASA2_BOVIN	96	109
ALNEINQFYQKFPQY	0	0	0	0	0	0	sp|P02663|CASA2_BOVIN	96	110
ALNEINQFYQKFPQYL	0	0	0	0	0	0	sp|P02663|CASA2_BOVIN	96	111
ALNEINQFYQKFPQYLQ	0	0	0	0	0	0	sp|P02663|CASA2_BOVIN	96	112
ALNEINQFYQKFPQYLQY	0	0	0	0	0	0	sp|P02663|CASA2_BOVIN	96	113
ALNEINQFYQKFPQYLQYL	0	0	0	0	0	0	sp|P02663|CASA2_BOVIN	96	114
ALNEINQFYQKFPQYLQYLY	0	0	0	0	0	1	sp|P02663|CASA2_BOVIN	96	115
ALNEINQFYQKFPQYLQYLY	0	0	0	0	0	0	sp|P02663|CASA2_BOVIN	96	115
ALNEINQFYQKFPQYLQYLYQGPIVLNPWDQVKR	0	0	0	0	0	2	sp|P02663|CASA2_BOVIN	96	129
ALNEINQFYQKFPQYLQYLYQGPIVLNPWDQVKR	0	0	0	0	0	1	sp|P02663|CASA2_BOVIN	96	129
ALNEINQFYQKFPQYLQYLYQGPIVLNPWDQVKR	0	0	0	0	0	0	sp|P02663|CASA2_BOVIN	96	129
ALNEINQFYQKFPQYLQYLYQGPIVLNPWDQVKRN	0	0	0	0	0	0	sp|P02663|CASA2_BOVIN	96	130
ALNEINQFYQKFPQYLQYLYQGPIVLNPWDQVKRN	0	0	0	0	0	1	sp|P02663|CASA2_BOVIN	96	130
ALPQYLK	0	0	0	0	0	0	sp|P02663|CASA2_BOVIN	190	196
ALPQYLKT	0	0	0	0	0	0	sp|P02663|CASA2_BOVIN	190	197
ALPQYLKTV	0	0	0	0	0	0	sp|P02663|CASA2_BOVIN	190	198
ALPQYLKTVY	0	0	0	0	0	0	sp|P02663|CASA2_BOVIN	190	199
ALPQYLKTVYQH	0	0	0	0	0	0	sp|P02663|CASA2_BOVIN	190	201
ALPQYLKTVYQHQ	0	0	0	0	0	0	sp|P02663|CASA2_BOVIN	190	202
ALPQYLKTVYQHQK	0	0	0	0	0	0	sp|P02663|CASA2_BOVIN	190	203
ALPQYLKTVYQHQKA	0	0	0	0	0	0	sp|P02663|CASA2_BOVIN	190	204
ALPQYLKTVYQHQKA	0	0	0	0	0	1	sp|P02663|CASA2_BOVIN	190	204
ALPQYLKTVYQHQKAMKPWIQPK	0	0	0	0	0	1	sp|P02663|CASA2_BOVIN	190	212
AMAPKHKEMPFPKYPVEPF	0	0	0	0	0	0	sp|P02666|CASB_BOVIN	116	134
AMAPKHKEMPFPKYPVEPF	0	0	1	0	0	0	sp|P02666|CASB_BOVIN	116	134
AMAPKHKEMPFPKYPVEPFTESQ	0	0	0	0	0	0	sp|P02666|CASB_BOVIN	116	138
AMEDIKQ	0	0	0	0	0	0	sp|P02662|CASA1_BOVIN	68	74
AMEDIKQM	0	0	1	0	0	0	sp|P02662|CASA1_BOVIN	68	75
AMEDIKQM	0	0	0	0	0	0	sp|P02662|CASA1_BOVIN	68	75
AMEDIKQME	0	0	0	0	0	0	sp|P02662|CASA1_BOVIN	68	76
AMKPWIQPK	0	0	1	0	0	0	sp|P02663|CASA2_BOVIN	204	212
AMKPWIQPK	0	0	0	0	0	0	sp|P02663|CASA2_BOVIN	204	212
AMKPWIQPKT	0	0	0	0	0	0	sp|P02663|CASA2_BOVIN	204	213
AMKPWIQPKTK	0	0	0	0	0	0	sp|P02663|CASA2_BOVIN	204	214
APFPEVF	0	0	0	0	0	0	sp|P02662|CASA1_BOVIN	41	47
APFPEVFGK	0	0	0	0	0	0	sp|P02662|CASA1_BOVIN	41	49
APFPEVFGKEK	0	0	0	0	0	0	sp|P02662|CASA1_BOVIN	41	51
APFPEVFGKEKVN	0	0	0	0	0	0	sp|P02662|CASA1_BOVIN	41	53
APKHKEMPFPK	0	0	0	0	0	0	sp|P02666|CASB_BOVIN	118	128
APKHKEMPFPKYP	0	0	0	0	0	0	sp|P02666|CASB_BOVIN	118	130
APKHKEMPFPKYPV	0	0	0	0	0	0	sp|P02666|CASB_BOVIN	118	131
APKHKEMPFPKYPVEP	0	0	0	0	0	0	sp|P02666|CASB_BOVIN	118	133
APKHKEMPFPKYPVEPF	0	0	1	0	0	0	sp|P02666|CASB_BOVIN	118	134
APKHKEMPFPKYPVEPF	0	0	0	0	0	0	sp|P02666|CASB_BOVIN	118	134
APKHKEMPFPKYPVEPFT	0	0	0	0	0	0	sp|P02666|CASB_BOVIN	118	135
APKHKEMPFPKYPVEPFTE	0	0	0	0	0	0	sp|P02666|CASB_BOVIN	118	136
APKHKEMPFPKYPVEPFTESQ	0	0	0	0	0	0	sp|P02666|CASB_BOVIN	118	138
APKHKEMPFPKYPVEPFTESQSLTLTDVENLHLPLP	0	0	0	0	0	1	sp|P02666|CASB_BOVIN	118	153
APKHKEMPFPKYPVEPFTESQSLTLTDVENLHLPLPLLQS	0	0	0	0	0	1	sp|P02666|CASB_BOVIN	118	157
APSFSDIPNP	0	0	0	0	0	0	sp|P02662|CASA1_BOVIN	191	200
APSFSDIPNPIG	0	0	0	0	0	0	sp|P02662|CASA1_BOVIN	191	202
APSFSDIPNPIGS	0	0	0	0	0	0	sp|P02662|CASA1_BOVIN	191	203
APSFSDIPNPIGSE	0	0	0	0	0	0	sp|P02662|CASA1_BOVIN	191	204
APSFSDIPNPIGSEN	0	0	0	0	0	0	sp|P02662|CASA1_BOVIN	191	205
APSFSDIPNPIGSEN	0	0	0	0	0	1	sp|P02662|CASA1_BOVIN	191	205
APSFSDIPNPIGSENSE	0	0	0	0	0	0	sp|P02662|CASA1_BOVIN	191	207
APSFSDIPNPIGSENSE	0	0	0	0	0	1	sp|P02662|CASA1_BOVIN	191	207
APSFSDIPNPIGSENSEK	0	0	0	0	0	0	sp|P02662|CASA1_BOVIN	191	208
APSFSDIPNPIGSENSEK	0	0	0	0	0	1	sp|P02662|CASA1_BOVIN	191	208
APSFSDIPNPIGSENSEKT	0	0	0	0	0	1	sp|P02662|CASA1_BOVIN	191	209
APSFSDIPNPIGSENSEKT	0	0	0	0	0	0	sp|P02662|CASA1_BOVIN	191	209
APSFSDIPNPIGSENSEKTTMP	0	0	1	0	0	0	sp|P02662|CASA1_BOVIN	191	212
APSFSDIPNPIGSENSEKTTMP	0	0	0	0	0	0	sp|P02662|CASA1_BOVIN	191	212
APSFSDIPNPIGSENSEKTTMPL	0	0	0	0	0	1	sp|P02662|CASA1_BOVIN	191	213
APSFSDIPNPIGSENSEKTTMPLW	0	0	1	0	0	0	sp|P02662|CASA1_BOVIN	191	214
APSFSDIPNPIGSENSEKTTMPLW	0	0	0	0	0	0	sp|P02662|CASA1_BOVIN	191	214
APSFSDIPNPIGSENSEKTTMPLW	0	0	0	0	0	1	sp|P02662|CASA1_BOVIN	191	214
AQQKEPMIG	0	0	0	0	0	0	sp|P02662|CASA1_BOVIN	144	152
AQQKEPMIGV	0	0	0	0	0	0	sp|P02662|CASA1_BOVIN	144	153
AQQKEPMIGV	0	0	1	0	0	0	sp|P02662|CASA1_BOVIN	144	153
AQQKEPMIGVN	0	0	1	0	0	0	sp|P02662|CASA1_BOVIN	144	154
AQQKEPMIGVN	0	0	0	0	0	0	sp|P02662|CASA1_BOVIN	144	154
AQQKEPMIGVN	0	0	0	0	0	1	sp|P02662|CASA1_BOVIN	144	154
AQQKEPMIGVNQ	0	0	1	0	0	0	sp|P02662|CASA1_BOVIN	144	155
AQQKEPMIGVNQ	0	0	0	0	0	0	sp|P02662|CASA1_BOVIN	144	155
AQQKEPMIGVNQE	0	0	1	0	0	0	sp|P02662|CASA1_BOVIN	144	156
AQQKEPMIGVNQE	0	0	0	0	0	0	sp|P02662|CASA1_BOVIN	144	156
AQQKEPMIGVNQEL	0	0	0	0	0	0	sp|P02662|CASA1_BOVIN	144	157
AQQKEPMIGVNQEL	0	0	1	0	0	0	sp|P02662|CASA1_BOVIN	144	157
AQQKEPMIGVNQELA	0	0	0	0	0	0	sp|P02662|CASA1_BOVIN	144	158
AQQKEPMIGVNQELA	0	0	1	0	0	0	sp|P02662|CASA1_BOVIN	144	158
AQQKEPMIGVNQELAY	0	0	0	0	0	0	sp|P02662|CASA1_BOVIN	144	159
AQQKEPMIGVNQELAYFYPE	0	0	0	0	0	0	sp|P02662|CASA1_BOVIN	144	163
AQQKEPMIGVNQELAYFYPELFR	0	0	0	0	0	0	sp|P02662|CASA1_BOVIN	144	166
AQQKEPMIGVNQELAYFYPELFRQ	0	0	0	0	0	0	sp|P02662|CASA1_BOVIN	144	167
AQQKEPMIGVNQELAYFYPELFRQF	0	0	0	0	0	0	sp|P02662|CASA1_BOVIN	144	168
AQQKEPMIGVNQELAYFYPELFRQFYQL	0	0	0	0	0	0	sp|P02662|CASA1_BOVIN	144	171
AQQKEPMIGVNQELAYFYPELFRQFYQLDAYPS	0	0	0	0	0	1	sp|P02662|CASA1_BOVIN	144	176
AQTQSLVYPFPGPIPN	0	0	0	0	0	0	sp|P02666|CASB_BOVIN	68	83
AQTQSLVYPFPGPIPNSLPQ	0	0	0	0	0	0	sp|P02666|CASB_BOVIN	68	87
AQTQSLVYPFPGPIPNSLPQNIPPL	0	0	0	0	0	0	sp|P02666|CASB_BOVIN	68	92
AQTQSLVYPFPGPIPNSLPQNIPPLTQTPVVVPPF	0	0	0	0	0	1	sp|P02666|CASB_BOVIN	68	102
AQTQSLVYPFPGPIPNSLPQNIPPLTQTPVVVPPFLQPEVM	0	0	0	0	0	0	sp|P02666|CASB_BOVIN	68	108
AQTQSLVYPFPGPIPNSLPQNIPPLTQTPVVVPPFLQPEVM	0	0	0	0	0	2	sp|P02666|CASB_BOVIN	68	108
AQTQSLVYPFPGPIPNSLPQNIPPLTQTPVVVPPFLQPEVM	0	0	0	0	0	1	sp|P02666|CASB_BOVIN	68	108
AQTQSLVYPFPGPIPNSLPQNIPPLTQTPVVVPPFLQPEVMGV	0	0	0	0	0	2	sp|P02666|CASB_BOVIN	68	110
AQTQSLVYPFPGPIPNSLPQNIPPLTQTPVVVPPFLQPEVMGVS	0	0	0	0	0	0	sp|P02666|CASB_BOVIN	68	111
AQTQSLVYPFPGPIPNSLPQNIPPLTQTPVVVPPFLQPEVMGVS	0	0	0	0	0	2	sp|P02666|CASB_BOVIN	68	111
AQTQSLVYPFPGPIPNSLPQNIPPLTQTPVVVPPFLQPEVMGVSK	0	0	0	0	0	2	sp|P02666|CASB_BOVIN	68	112
ARHPHPHLSF	0	0	0	0	0	0	sp|P02668|CASK_BOVIN	117	126
ARSDLDDDIIPEEDIIS	0	0	0	0	0	0	sp|Q2UVX4|CO3_BOVIN	745	761
ASLAATSLAILNKPEDETHLEAQPTDASAQ	0	2	0	0	0	0	sp|P80195|GLCM1_BOVIN	10	39
AVDVTLDPDTAHPH	0	0	0	0	0	0	sp|P18892|BT1A1_BOVIN	302	315
AVKAPGFGD	0	0	0	0	0	0	sp|P31081|CH60_BOVIN	299	307
AVPITPTLN	0	0	0	0	0	0	sp|P02663|CASA2_BOVIN	131	139
AVPITPTLNR	0	0	0	0	0	0	sp|P02663|CASA2_BOVIN	131	140
AVPITPTLNRE	0	0	0	0	0	0	sp|P02663|CASA2_BOVIN	131	141
AVPITPTLNREQ	0	0	0	0	0	0	sp|P02663|CASA2_BOVIN	131	142
AVPITPTLNREQ	0	0	0	0	0	1	sp|P02663|CASA2_BOVIN	131	142
AVPITPTLNREQL	0	0	0	0	0	0	sp|P02663|CASA2_BOVIN	131	143
AVPITPTLNREQLSTSEENSK	0	0	0	0	0	0	sp|P02663|CASA2_BOVIN	131	151
AVPITPTLNREQLSTSEENSK	0	2	0	0	0	0	sp|P02663|CASA2_BOVIN	131	151
AVPITPTLNREQLSTSEENSKK	0	2	0	0	0	0	sp|P02663|CASA2_BOVIN	131	152
AVPITPTLNREQLSTSEENSKKTVDMESTEVFTK	0	3	0	0	0	0	sp|P02663|CASA2_BOVIN	131	164
AVPYPQRDMP	0	0	0	0	0	0	sp|P02666|CASB_BOVIN	192	201
AVPYPQRDMP	0	0	1	0	0	0	sp|P02666|CASB_BOVIN	192	201
AVPYPQRDMPI	0	0	0	0	0	0	sp|P02666|CASB_BOVIN	192	202
AVPYPQRDMPI	0	0	1	0	0	0	sp|P02666|CASB_BOVIN	192	202
AVPYPQRDMPIQ	0	0	1	0	0	0	sp|P02666|CASB_BOVIN	192	203
AVPYPQRDMPIQ	0	0	0	0	0	0	sp|P02666|CASB_BOVIN	192	203
AVPYPQRDMPIQA	0	0	1	0	0	0	sp|P02666|CASB_BOVIN	192	204
AVPYPQRDMPIQA	0	0	0	0	0	0	sp|P02666|CASB_BOVIN	192	204
AVPYPQRDMPIQA	0	0	0	0	0	1	sp|P02666|CASB_BOVIN	192	204
AVPYPQRDMPIQAF	0	0	1	0	0	0	sp|P02666|CASB_BOVIN	192	205
AVPYPQRDMPIQAF	0	0	0	0	0	0	sp|P02666|CASB_BOVIN	192	205
AVPYPQRDMPIQAF	0	0	0	0	0	1	sp|P02666|CASB_BOVIN	192	205
AVPYPQRDMPIQAFL	0	0	0	0	0	0	sp|P02666|CASB_BOVIN	192	206
AVPYPQRDMPIQAFLL	0	0	0	0	0	0	sp|P02666|CASB_BOVIN	192	207
AVPYPQRDMPIQAFLLY	0	0	0	0	0	0	sp|P02666|CASB_BOVIN	192	208
AVPYPQRDMPIQAFLLYQEPVLGPVRGPFP	0	0	0	0	0	1	sp|P02666|CASB_BOVIN	192	221
AVPYPQRDMPIQAFLLYQEPVLGPVRGPFP	0	0	0	0	0	0	sp|P02666|CASB_BOVIN	192	221
AVPYPQRDMPIQAFLLYQEPVLGPVRGPFPIIV	0	0	1	0	0	0	sp|P02666|CASB_BOVIN	192	224
AVPYPQRDMPIQAFLLYQEPVLGPVRGPFPIIV	0	0	0	0	0	0	sp|P02666|CASB_BOVIN	192	224
AVPYPQRDMPIQAFLLYQEPVLGPVRGPFPIIV	0	0	0	0	0	1	sp|P02666|CASB_BOVIN	192	224
AVRSPAQILQWQVLSNTVPA	0	0	0	0	0	1	sp|P02668|CASK_BOVIN	87	106
AVRSPAQILQWQVLSNTVPA	0	0	0	0	0	0	sp|P02668|CASK_BOVIN	87	106
AVRSPAQILQWQVLSNTVPA	0	0	0	0	0	2	sp|P02668|CASK_BOVIN	87	106
AWYYVPLGTQYTDAPSFSDIPNPIGSEN	0	0	0	0	0	1	sp|P02662|CASA1_BOVIN	178	205
AYFYPELFR	0	0	0	0	0	0	sp|P02662|CASA1_BOVIN	158	166
AYFYPELFRQ	0	0	0	0	0	0	sp|P02662|CASA1_BOVIN	158	167
CRKNKKRGAAQVLRP	0	0	0	0	0	0	sp|Q08DV9|T131L_BOVIN	1206	1220
DAPSFSDIPNPIGSE	0	0	0	0	0	0	sp|P02662|CASA1_BOVIN	190	204
DAPSFSDIPNPIGSEN	0	0	0	0	0	0	sp|P02662|CASA1_BOVIN	190	205
DAPSFSDIPNPIGSENSE	0	0	0	0	0	0	sp|P02662|CASA1_BOVIN	190	207
DAPSFSDIPNPIGSENSEK	0	0	0	0	0	0	sp|P02662|CASA1_BOVIN	190	208
DAPSFSDIPNPIGSENSEK	0	0	0	0	0	1	sp|P02662|CASA1_BOVIN	190	208
DAPSFSDIPNPIGSENSEKT	0	0	0	0	0	0	sp|P02662|CASA1_BOVIN	190	209
DAPSFSDIPNPIGSENSEKT	0	0	0	0	0	1	sp|P02662|CASA1_BOVIN	190	209
DAPSFSDIPNPIGSENSEKTTMP	0	0	1	0	0	0	sp|P02662|CASA1_BOVIN	190	212
DAPSFSDIPNPIGSENSEKTTMP	0	0	0	0	0	0	sp|P02662|CASA1_BOVIN	190	212
DAPSFSDIPNPIGSENSEKTTMP	0	0	0	0	0	1	sp|P02662|CASA1_BOVIN	190	212
DAPSFSDIPNPIGSENSEKTTMPL	0	0	0	0	0	0	sp|P02662|CASA1_BOVIN	190	213
DAPSFSDIPNPIGSENSEKTTMPL	0	0	0	0	0	1	sp|P02662|CASA1_BOVIN	190	213
DAPSFSDIPNPIGSENSEKTTMPLW	0	0	0	0	0	0	sp|P02662|CASA1_BOVIN	190	214
DAYPSGAWYYVPLGTQYTDAPSFSDIPNPIGSENSEKTTMPLW	0	0	0	0	0	0	sp|P02662|CASA1_BOVIN	172	214
DAYPSGAWYYVPLGTQYTDAPSFSDIPNPIGSENSEKTTMPLW	0	0	0	0	0	1	sp|P02662|CASA1_BOVIN	172	214
DDLTDDIM	0	0	1	0	0	0	sp|P00711|LALBA_BOVIN	102	109
DELQDKIHPF	0	0	0	0	0	0	sp|P02666|CASB_BOVIN	58	67
DELQDKIHPFAQTQ	0	0	0	0	0	0	sp|P02666|CASB_BOVIN	58	71
DEQEDGIPGLLGGSES	0	0	0	0	0	0	tr|F1MX46|F1MX46_BOVIN	40	55
DEQEEEEAANQKLA	0	0	0	0	0	0	tr|F1N1E0|F1N1E0_BOVIN	727	740
DEQQESVRAAPERS	0	0	0	0	0	0	tr|E1BCR2|E1BCR2_BOVIN	814	827
DEQQESVRAAPERS	0	0	0	0	0	1	tr|E1BCR2|E1BCR2_BOVIN	814	827
DERFFSD	0	0	0	0	0	0	sp|P02668|CASK_BOVIN	35	41
DERFFSDK	0	0	0	0	0	0	sp|P02668|CASK_BOVIN	35	42
DIANGEIGFISNLP	0	0	0	0	0	0	tr|F1N0A6|F1N0A6_BOVIN	646	659
DIGSESTEDQAMEDIK	0	0	1	0	0	0	sp|P02662|CASA1_BOVIN	58	73
DIPNPIGSE	0	0	0	0	0	0	sp|P02662|CASA1_BOVIN	196	204
DIPNPIGSEN	0	0	0	0	0	0	sp|P02662|CASA1_BOVIN	196	205
DIPNPIGSEN	0	0	0	0	0	1	sp|P02662|CASA1_BOVIN	196	205
DIPNPIGSENS	0	0	0	0	0	1	sp|P02662|CASA1_BOVIN	196	206
DIPNPIGSENS	0	0	0	0	0	0	sp|P02662|CASA1_BOVIN	196	206
DIPNPIGSENSE	0	0	0	0	0	0	sp|P02662|CASA1_BOVIN	196	207
DIPNPIGSENSE	0	0	0	0	0	1	sp|P02662|CASA1_BOVIN	196	207
DIPNPIGSENSEK	0	0	0	0	0	0	sp|P02662|CASA1_BOVIN	196	208
DIPNPIGSENSEK	0	0	0	0	0	1	sp|P02662|CASA1_BOVIN	196	208
DIPNPIGSENSEKT	0	0	0	0	0	0	sp|P02662|CASA1_BOVIN	196	209
DIPNPIGSENSEKTT	0	0	0	0	0	0	sp|P02662|CASA1_BOVIN	196	210
DIPNPIGSENSEKTT	0	0	0	0	0	1	sp|P02662|CASA1_BOVIN	196	210
DIPNPIGSENSEKTTMP	0	0	1	0	0	0	sp|P02662|CASA1_BOVIN	196	212
DIPNPIGSENSEKTTMP	0	0	0	0	0	1	sp|P02662|CASA1_BOVIN	196	212
DIPNPIGSENSEKTTMPL	0	0	0	0	0	1	sp|P02662|CASA1_BOVIN	196	213
DIPNPIGSENSEKTTMPL	0	0	1	0	0	0	sp|P02662|CASA1_BOVIN	196	213
DIPNPIGSENSEKTTMPL	0	0	0	0	0	0	sp|P02662|CASA1_BOVIN	196	213
DIPNPIGSENSEKTTMPLW	0	0	0	0	0	1	sp|P02662|CASA1_BOVIN	196	214
DKEGIPPDQQ	0	0	0	0	0	0	sp|P63048|RL40_BOVIN	32	41
DKFLDDDLTDDIM	0	0	1	0	0	0	sp|P00711|LALBA_BOVIN	97	109
DKFLDDDLTDDIM	0	0	0	0	0	0	sp|P00711|LALBA_BOVIN	97	109
DKIHPFAQ	0	0	0	0	0	0	sp|P02666|CASB_BOVIN	62	69
DKIHPFAQTQ	0	0	0	0	0	0	sp|P02666|CASB_BOVIN	62	71
DKIHPFAQTQ	0	0	0	0	0	1	sp|P02666|CASB_BOVIN	62	71
DKIHPFAQTQS	0	0	0	0	0	0	sp|P02666|CASB_BOVIN	62	72
DKIHPFAQTQSL	0	0	0	0	0	0	sp|P02666|CASB_BOVIN	62	73
DKPWLQKP	0	0	0	0	0	0	tr|E1BFA0|E1BFA0_BOVIN	19	26
DKTEIPTIN	0	0	0	0	0	0	sp|P02668|CASK_BOVIN	136	144
DLDHKSEEDKHLK	0	1	0	0	0	0	sp|P31098|OSTK_BOVIN	250	262
DLISKEQIVIR	0	1	0	0	0	0	sp|P80195|GLCM1_BOVIN	61	71
DMESTEVFTK	0	0	1	0	0	0	sp|P02663|CASA2_BOVIN	155	164
DMESTEVFTK	0	0	0	0	0	0	sp|P02663|CASA2_BOVIN	155	164
DMESTEVFTKK	0	1	0	0	0	0	sp|P02663|CASA2_BOVIN	155	165
DMESTEVFTKKTK	0	1	0	0	0	0	sp|P02663|CASA2_BOVIN	155	167
DMESTEVFTKKTKLTEEEKNRLNFL	0	0	1	0	0	0	sp|P02663|CASA2_BOVIN	155	179
DMPIQAFLL	0	0	1	0	0	0	sp|P02666|CASB_BOVIN	199	207
DMPIQAFLLYQEPVL	0	0	0	0	0	0	sp|P02666|CASB_BOVIN	199	213
DMPIQAFLLYQEPVLGPVRGPFPIIV	0	0	1	0	0	0	sp|P02666|CASB_BOVIN	199	224
DMPIQAFLLYQEPVLGPVRGPFPIIV	0	0	0	0	0	0	sp|P02666|CASB_BOVIN	199	224
DMPIQAFLLYQEPVLGPVRGPFPIIV	0	0	0	0	0	1	sp|P02666|CASB_BOVIN	199	224
DPASAAAAAAAAAAVIP	0	1	0	0	0	0	tr|F6RYN2|F6RYN2_BOVIN	487	503
DQAMEDIKQM	0	0	0	0	0	0	sp|P02662|CASA1_BOVIN	66	75
DQEILMHHPPQ	0	0	0	0	0	1	tr|A7MB65|A7MB65_BOVIN	388	398
DQVKRNAVPITPT	0	0	0	0	0	1	sp|P02663|CASA2_BOVIN	125	137
DQVKRNAVPITPTLN	0	0	0	0	0	1	sp|P02663|CASA2_BOVIN	125	139
DQVKRNAVPITPTLNREQLSTSEENSK	0	2	0	0	0	0	sp|P02663|CASA2_BOVIN	125	151
DQVKRNAVPITPTLNREQLSTSEENSKK	0	2	0	0	0	0	sp|P02663|CASA2_BOVIN	125	152
DRITGGKDFR	0	0	0	0	0	0	sp|P11151|LIPL_BOVIN	29	38
DVENLHLPLP	0	0	0	0	0	0	sp|P02666|CASB_BOVIN	144	153
DVENLHLPLPL	0	0	0	0	0	0	sp|P02666|CASB_BOVIN	144	154
DVENLHLPLPL	0	0	0	0	0	1	sp|P02666|CASB_BOVIN	144	154
DVENLHLPLPLL	0	0	0	0	0	0	sp|P02666|CASB_BOVIN	144	155
DVENLHLPLPLL	0	0	0	0	0	1	sp|P02666|CASB_BOVIN	144	155
DVENLHLPLPLLQ	0	0	0	0	0	0	sp|P02666|CASB_BOVIN	144	156
DVENLHLPLPLLQ	0	0	0	0	0	1	sp|P02666|CASB_BOVIN	144	156
DVENLHLPLPLLQS	0	0	0	0	0	0	sp|P02666|CASB_BOVIN	144	157
DVENLHLPLPLLQSW	0	0	0	0	0	0	sp|P02666|CASB_BOVIN	144	158
DVENLHLPLPLLQSWMHQPHQPLP	0	0	0	0	0	1	sp|P02666|CASB_BOVIN	144	167
DVENLHLPLPLLQSWMHQPHQPLPPT	0	0	0	0	0	1	sp|P02666|CASB_BOVIN	144	169
DVENLHLPLPLLQSWMHQPHQPLPPT	0	0	0	0	0	0	sp|P02666|CASB_BOVIN	144	169
DVENLHLPLPLLQSWMHQPHQPLPPTVMFPPQ	0	0	0	0	0	1	sp|P02666|CASB_BOVIN	144	175
DVENLHLPLPLLQSWMHQPHQPLPPTVMFPPQ	0	0	0	0	0	2	sp|P02666|CASB_BOVIN	144	175
DVENLHLPLPLLQSWMHQPHQPLPPTVMFPPQ	0	0	0	0	0	0	sp|P02666|CASB_BOVIN	144	175
DVENLHLPLPLLQSWMHQPHQPLPPTVMFPPQSV	0	0	0	0	0	1	sp|P02666|CASB_BOVIN	144	177
DVENLHLPLPLLQSWMHQPHQPLPPTVMFPPQSVL	0	0	0	0	0	1	sp|P02666|CASB_BOVIN	144	178
DVENLHLPLPLLQSWMHQPHQPLPPTVMFPPQSVL	0	0	0	0	0	0	sp|P02666|CASB_BOVIN	144	178
DVENLHLPLPLLQSWMHQPHQPLPPTVMFPPQSVLSL	0	0	0	0	0	1	sp|P02666|CASB_BOVIN	144	180
DVFEKGKVGG	0	0	0	0	0	0	tr|F1N2K1|F1N2K1_BOVIN	67	76
DVPSERYLGYL	0	0	0	0	0	0	sp|P02662|CASA1_BOVIN	100	110
DVPSERYLGYLE	0	0	0	0	0	0	sp|P02662|CASA1_BOVIN	100	111
DVPSERYLGYLEQ	0	0	0	0	0	0	sp|P02662|CASA1_BOVIN	100	112
DVPSERYLGYLEQL	0	0	0	0	0	0	sp|P02662|CASA1_BOVIN	100	113
DVPSERYLGYLEQLL	0	0	0	0	0	0	sp|P02662|CASA1_BOVIN	100	114
DVPSERYLGYLEQLLR	0	0	0	0	0	0	sp|P02662|CASA1_BOVIN	100	115
DVPSERYLGYLEQLLRL	0	0	0	0	0	0	sp|P02662|CASA1_BOVIN	100	116
DVPSERYLGYLEQLLRLK	0	0	0	0	0	0	sp|P02662|CASA1_BOVIN	100	117
DVPSERYLGYLEQLLRLKK	0	0	0	0	0	0	sp|P02662|CASA1_BOVIN	100	118
DVPSERYLGYLEQLLRLKKY	0	0	0	0	0	0	sp|P02662|CASA1_BOVIN	100	119
EAAEAKAQEAAK	0	0	0	0	0	1	tr|E1BF55|E1BF55_BOVIN	406	417
EAAEGVEAAEGVEAAEGAQDLSVDLMQ	0	0	1	0	0	0	tr|G3MY94|G3MY94_BOVIN	202	228
EAEKAKAAALAAAAAETS	0	0	0	0	0	0	tr|F1ML71|F1ML71_BOVIN	188	205
EAEKAKAAALAAAAAETSQ	0	0	0	0	0	0	tr|F1ML71|F1ML71_BOVIN	188	206
EAMAPKHKEMPF	0	0	1	0	0	0	sp|P02666|CASB_BOVIN	115	126
EAMAPKHKEMPFP	0	0	2	0	0	0	sp|P02666|CASB_BOVIN	115	127
EAMAPKHKEMPFPK	0	0	1	0	0	0	sp|P02666|CASB_BOVIN	115	128
EAMAPKHKEMPFPK	0	0	0	0	0	0	sp|P02666|CASB_BOVIN	115	128
EAMAPKHKEMPFPK	0	0	1	1	0	0	sp|P02666|CASB_BOVIN	115	128
EAMAPKHKEMPFPKYPVEPF	0	0	0	0	0	0	sp|P02666|CASB_BOVIN	115	134
EAMAPKHKEMPFPKYPVEPFTESQ	0	0	0	0	0	0	sp|P02666|CASB_BOVIN	115	138
EAMAPKHKEMPFPKYPVEPFTESQSL	0	0	0	0	0	0	sp|P02666|CASB_BOVIN	115	140
EDDVPSLWVY	0	0	0	0	0	0	sp|P07318|CRBB1_BOVIN	169	178
EDELQDKIHPF	0	0	0	0	0	0	sp|P02666|CASB_BOVIN	57	67
EDELQDKIHPFAQTQ	0	0	0	0	0	0	sp|P02666|CASB_BOVIN	57	71
EDQAMEDIK	0	0	0	0	0	0	sp|P02662|CASA1_BOVIN	65	73
EDQEFQAKHLDQ	0	0	0	0	0	0	tr|E1BDJ1|E1BDJ1_BOVIN	617	628
EDQEILMHHPPQ	0	0	0	0	0	0	tr|A7MB65|A7MB65_BOVIN	387	398
EDVPSERYL	0	0	0	0	0	0	sp|P02662|CASA1_BOVIN	99	107
EDVPSERYLG	0	0	0	0	0	0	sp|P02662|CASA1_BOVIN	99	108
EDVPSERYLGY	0	0	0	0	0	0	sp|P02662|CASA1_BOVIN	99	109
EDVPSERYLGYL	0	0	0	0	0	0	sp|P02662|CASA1_BOVIN	99	110
EDVPSERYLGYLE	0	0	0	0	0	0	sp|P02662|CASA1_BOVIN	99	111
EDVPSERYLGYLEQL	0	0	0	0	0	0	sp|P02662|CASA1_BOVIN	99	113
EDVPSERYLGYLEQLL	0	0	0	0	0	0	sp|P02662|CASA1_BOVIN	99	114
EDVPSERYLGYLEQLLRL	0	0	0	0	0	0	sp|P02662|CASA1_BOVIN	99	116
EDVPSERYLGYLEQLLRLK	0	0	0	0	0	0	sp|P02662|CASA1_BOVIN	99	117
EDVPSERYLGYLEQLLRLKK	0	0	0	0	0	0	sp|P02662|CASA1_BOVIN	99	118
EDVPSERYLGYLEQLLRLKKY	0	0	0	0	0	0	sp|P02662|CASA1_BOVIN	99	119
EEEKNRLNF	0	0	0	0	0	0	sp|P02663|CASA2_BOVIN	170	178
EEEKNRLNFL	0	0	0	0	0	0	sp|P02663|CASA2_BOVIN	170	179
EEEKNRLNFLK	0	0	0	0	0	0	sp|P02663|CASA2_BOVIN	170	180
EEIVPNSVEQK	0	1	0	0	0	0	sp|P02662|CASA1_BOVIN	84	94
EEIVPNSVEQK	0	0	0	0	0	1	sp|P02662|CASA1_BOVIN	84	94
EEIVPNSVEQKHIQ	0	1	0	0	0	0	sp|P02662|CASA1_BOVIN	84	97
EEIVPNSVEQKHIQKEDVPSERYL	0	0	0	1	0	0	sp|P02662|CASA1_BOVIN	84	107
EEKNRLNF	0	0	0	0	0	0	sp|P02663|CASA2_BOVIN	171	178
EELKPTPEGDLE	0	0	0	0	0	0	sp|P02754|LACB_BOVIN	60	71
EELKPTPEGDLEI	0	0	0	0	0	0	sp|P02754|LACB_BOVIN	60	72
EELKPTPEGDLEILLQ	0	0	0	0	0	0	sp|P02754|LACB_BOVIN	60	75
EELNVPGEIVESL	0	0	0	0	0	0	sp|P02666|CASB_BOVIN	19	31
EEPASPQEP	0	0	0	0	0	0	tr|G3N3T9|G3N3T9_BOVIN	15	23
EEQQQTEDELQDKIHPF	0	0	0	0	0	0	sp|P02666|CASB_BOVIN	51	67
EEQQQTEDELQDKIHPF	0	0	0	0	0	1	sp|P02666|CASB_BOVIN	51	67
EERLHSMKEGIH	0	0	0	0	0	0	sp|P02662|CASA1_BOVIN	132	143
EERLHSMKEGIHAQ	0	0	0	0	0	0	sp|P02662|CASA1_BOVIN	132	145
EESAEVATEEVK	0	1	0	0	0	0	sp|P02663|CASA2_BOVIN	74	85
EESITRINKKIEKFQSEEQQQTEDELQDKIHPF	0	3	0	1	0	0	sp|P02666|CASB_BOVIN	35	67
EGAEPVGQGAAAAVVVP	0	0	0	0	0	0	tr|F1MPT5|F1MPT5_BOVIN	2554	2570
EGIHAQQKEPM	0	0	0	0	0	0	sp|P02662|CASA1_BOVIN	140	150
EGIHAQQKEPMIG	0	0	0	0	0	0	sp|P02662|CASA1_BOVIN	140	152
EGIHAQQKEPMIGVN	0	0	0	0	0	0	sp|P02662|CASA1_BOVIN	140	154
EGIHAQQKEPMIGVN	0	0	1	0	0	0	sp|P02662|CASA1_BOVIN	140	154
EGIHAQQKEPMIGVNQ	0	0	0	0	0	0	sp|P02662|CASA1_BOVIN	140	155
EGIHAQQKEPMIGVNQEL	0	0	0	0	0	0	sp|P02662|CASA1_BOVIN	140	157
EGIHAQQKEPMIGVNQEL	0	0	1	0	0	0	sp|P02662|CASA1_BOVIN	140	157
EGIHAQQKEPMIGVNQELA	0	0	1	0	0	0	sp|P02662|CASA1_BOVIN	140	158
EGIHAQQKEPMIGVNQELA	0	0	0	0	0	0	sp|P02662|CASA1_BOVIN	140	158
EGIHAQQKEPMIGVNQELAY	0	0	0	0	0	0	sp|P02662|CASA1_BOVIN	140	159
EGIHAQQKEPMIGVNQELAYFYPE	0	0	0	0	0	0	sp|P02662|CASA1_BOVIN	140	163
EGIHAQQKEPMIGVNQELAYFYPE	0	0	0	0	0	1	sp|P02662|CASA1_BOVIN	140	163
EGIHAQQKEPMIGVNQELAYFYPELF	0	0	0	0	0	0	sp|P02662|CASA1_BOVIN	140	165
EGIHAQQKEPMIGVNQELAYFYPELF	0	0	0	0	0	1	sp|P02662|CASA1_BOVIN	140	165
EGIHAQQKEPMIGVNQELAYFYPELFR	0	0	0	0	0	0	sp|P02662|CASA1_BOVIN	140	166
EGIHAQQKEPMIGVNQELAYFYPELFR	0	0	0	0	0	1	sp|P02662|CASA1_BOVIN	140	166
EGIHAQQKEPMIGVNQELAYFYPELFRQ	0	0	1	0	0	0	sp|P02662|CASA1_BOVIN	140	167
EGIHAQQKEPMIGVNQELAYFYPELFRQ	0	0	0	0	0	0	sp|P02662|CASA1_BOVIN	140	167
EGIHAQQKEPMIGVNQELAYFYPELFRQ	0	0	0	0	0	1	sp|P02662|CASA1_BOVIN	140	167
EGIHAQQKEPMIGVNQELAYFYPELFRQ	0	0	0	0	0	2	sp|P02662|CASA1_BOVIN	140	167
EGIHAQQKEPMIGVNQELAYFYPELFRQF	0	0	0	0	0	1	sp|P02662|CASA1_BOVIN	140	168
EGIHAQQKEPMIGVNQELAYFYPELFRQF	0	0	0	0	0	0	sp|P02662|CASA1_BOVIN	140	168
EGIHAQQKEPMIGVNQELAYFYPELFRQFYQ	0	0	0	0	0	1	sp|P02662|CASA1_BOVIN	140	170
EGIHAQQKEPMIGVNQELAYFYPELFRQFYQ	0	0	0	0	0	0	sp|P02662|CASA1_BOVIN	140	170
EGIHAQQKEPMIGVNQELAYFYPELFRQFYQL	0	0	0	0	0	0	sp|P02662|CASA1_BOVIN	140	171
EGIHAQQKEPMIGVNQELAYFYPELFRQFYQL	0	0	0	0	0	1	sp|P02662|CASA1_BOVIN	140	171
EGIHAQQKEPMIGVNQELAYFYPELFRQFYQLDAYPS	0	0	0	0	0	2	sp|P02662|CASA1_BOVIN	140	176
EGIHAQQKEPMIGVNQELAYFYPELFRQFYQLDAYPS	0	0	0	0	0	0	sp|P02662|CASA1_BOVIN	140	176
EGNPEVPVHF	0	0	0	0	0	0	tr|Q58DP6|Q58DP6_BOVIN	136	145
EGNPEVPVHFDK	0	0	0	0	0	0	tr|Q58DP6|Q58DP6_BOVIN	136	147
EHVSSSEESIISQE	0	1	0	0	0	0	sp|P02663|CASA2_BOVIN	20	33
EHVSSSEESIISQE	0	0	0	0	0	0	sp|P02663|CASA2_BOVIN	20	33
EHVSSSEESIISQETYK	0	0	0	0	0	0	sp|P02663|CASA2_BOVIN	20	36
EIKPVMALGLVPMCSYQMERMFNTTRIPGKDTDVL	0	0	2	0	0	0	sp|Q58DK1|CPT1B_BOVIN	291	325
EIVDMIQNDGDLQ	0	0	1	0	0	0	tr|E1BIS9|E1BIS9_BOVIN	64	76
EIVPNSAE	0	0	0	0	0	1	sp|P02662|CASA1_BOVIN	125	132
EIVPNSAEER	0	0	0	0	0	0	sp|P02662|CASA1_BOVIN	125	134
EIVPNSAEER	0	1	0	0	0	0	sp|P02662|CASA1_BOVIN	125	134
EIVPNSAEER	0	0	0	0	0	1	sp|P02662|CASA1_BOVIN	125	134
EIVPNSAEERL	0	0	0	0	0	1	sp|P02662|CASA1_BOVIN	125	135
EIVPNSAEERL	0	0	0	0	0	0	sp|P02662|CASA1_BOVIN	125	135
EIVPNSAEERL	0	1	0	0	0	0	sp|P02662|CASA1_BOVIN	125	135
EIVPNSAEERL	0	1	0	1	0	0	sp|P02662|CASA1_BOVIN	125	135
EIVPNSAEERLH	0	0	0	0	0	0	sp|P02662|CASA1_BOVIN	125	136
EIVPNSAEERLH	0	1	0	0	0	0	sp|P02662|CASA1_BOVIN	125	136
EIVPNSAEERLH	0	1	0	1	0	0	sp|P02662|CASA1_BOVIN	125	136
EIVPNSAEERLH	0	0	0	0	0	1	sp|P02662|CASA1_BOVIN	125	136
EIVPNSAEERLHSM	0	0	0	0	0	0	sp|P02662|CASA1_BOVIN	125	138
EIVPNSAEERLHSM	0	1	0	0	0	0	sp|P02662|CASA1_BOVIN	125	138
EIVPNSAEERLHSMK	0	1	0	0	0	0	sp|P02662|CASA1_BOVIN	125	139
EIVPNSAEERLHSMK	0	1	0	1	0	0	sp|P02662|CASA1_BOVIN	125	139
EIVPNSAEERLHSMKE	0	1	0	0	0	0	sp|P02662|CASA1_BOVIN	125	140
EIVPNSAEERLHSMKEGIH	0	1	0	0	0	0	sp|P02662|CASA1_BOVIN	125	143
EIVPNSAEERLHSMKEGIHA	0	1	0	0	0	0	sp|P02662|CASA1_BOVIN	125	144
EIVPNSAEERLHSMKEGIHAQ	0	0	0	0	0	0	sp|P02662|CASA1_BOVIN	125	145
EIVPNSAEERLHSMKEGIHAQ	0	1	0	0	0	0	sp|P02662|CASA1_BOVIN	125	145
EIVPNSVEQK	0	1	0	0	0	0	sp|P02662|CASA1_BOVIN	85	94
EIVPNSVEQKHIQ	0	1	0	0	0	0	sp|P02662|CASA1_BOVIN	85	97
EIVPNSVEQKHIQKE	0	1	0	0	0	0	sp|P02662|CASA1_BOVIN	85	99
EKDERFF	0	0	0	0	0	0	sp|P02668|CASK_BOVIN	33	39
EKDERFFSD	0	0	0	0	0	0	sp|P02668|CASK_BOVIN	33	41
EKDERFFSDK	0	0	0	0	0	0	sp|P02668|CASK_BOVIN	33	42
EKDERFFSDKI	0	0	0	0	0	0	sp|P02668|CASK_BOVIN	33	43
EKDLQEIMDSLVLEEPGAA	0	0	0	1	0	0	tr|F1MD97|F1MD97_BOVIN	195	213
EKFQSEEQQQTE	0	0	0	0	0	0	sp|P02666|CASB_BOVIN	46	57
EKFQSEEQQQTED	0	0	0	0	0	0	sp|P02666|CASB_BOVIN	46	58
EKFQSEEQQQTEDELQ	0	1	0	0	0	0	sp|P02666|CASB_BOVIN	46	61
EKFQSEEQQQTEDELQDKIHPF	0	1	0	0	0	0	sp|P02666|CASB_BOVIN	46	67
EKVNELSKDIG	0	0	0	0	0	0	sp|P02662|CASA1_BOVIN	50	60
EKVNELSKDIGSE	0	1	0	0	0	0	sp|P02662|CASA1_BOVIN	50	62
EKVNELSKDIGSESTEDQAMEDIK	0	2	0	0	0	0	sp|P02662|CASA1_BOVIN	50	73
EKVNELSKDIGSESTEDQAMEDIK	0	3	0	0	0	0	sp|P02662|CASA1_BOVIN	50	73
ELAYFYPELFR	0	0	0	0	0	0	sp|P02662|CASA1_BOVIN	156	166
ELAYFYPELFRQ	0	0	0	0	0	0	sp|P02662|CASA1_BOVIN	156	167
ELEELNVPGEIVE	0	0	0	0	0	0	sp|P02666|CASB_BOVIN	17	29
ELEELNVPGEIVESL	0	0	0	0	0	0	sp|P02666|CASB_BOVIN	17	31
ELEELNVPGEIVESLS	0	0	0	0	0	0	sp|P02666|CASB_BOVIN	17	32
ELEELNVPGEIVESLSSSEESITRINK	0	3	0	0	0	0	sp|P02666|CASB_BOVIN	17	43
ELFRQFY	0	0	0	0	0	0	sp|P02662|CASA1_BOVIN	163	169
ELFRQFYQ	0	0	0	0	0	0	sp|P02662|CASA1_BOVIN	163	170
ELKDLKGY	0	0	0	0	0	0	sp|P00711|LALBA_BOVIN	30	37
ELKPTPEGDLEILLQ	0	0	0	0	0	0	sp|P02754|LACB_BOVIN	61	75
ELQDKIHPF	0	0	0	0	0	0	sp|P02666|CASB_BOVIN	59	67
ELQDKIHPF	0	0	0	1	0	0	sp|P02666|CASB_BOVIN	59	67
ELSKDIGSE	0	0	0	0	0	0	sp|P02662|CASA1_BOVIN	54	62
ELSKDIGSESTE	0	1	0	0	0	0	sp|P02662|CASA1_BOVIN	54	65
ELSKDIGSESTE	0	0	0	0	0	0	sp|P02662|CASA1_BOVIN	54	65
ELSKDIGSESTED	0	0	0	0	0	0	sp|P02662|CASA1_BOVIN	54	66
ELSKDIGSESTEDQ	0	0	0	0	0	0	sp|P02662|CASA1_BOVIN	54	67
ELSKDIGSESTEDQA	0	0	0	0	0	0	sp|P02662|CASA1_BOVIN	54	68
ELSKDIGSESTEDQAM	0	0	1	0	0	0	sp|P02662|CASA1_BOVIN	54	69
ELSKDIGSESTEDQAM	0	0	0	0	0	0	sp|P02662|CASA1_BOVIN	54	69
ELSKDIGSESTEDQAME	0	0	0	0	0	0	sp|P02662|CASA1_BOVIN	54	70
ELSKDIGSESTEDQAME	0	0	0	0	0	1	sp|P02662|CASA1_BOVIN	54	70
ELSKDIGSESTEDQAMEDIK	0	1	0	0	0	0	sp|P02662|CASA1_BOVIN	54	73
ELSKDIGSESTEDQAMEDIK	0	2	0	0	0	0	sp|P02662|CASA1_BOVIN	54	73
ELSKDIGSESTEDQAMEDIK	0	3	0	0	0	0	sp|P02662|CASA1_BOVIN	54	73
ELSKDIGSESTEDQAMEDIK	0	0	0	0	0	0	sp|P02662|CASA1_BOVIN	54	73
ELSKDIGSESTEDQAMEDIK	0	0	1	0	0	0	sp|P02662|CASA1_BOVIN	54	73
ELSKDIGSESTEDQAMEDIKQ	0	2	0	0	0	0	sp|P02662|CASA1_BOVIN	54	74
ELSKDIGSESTEDQAMEDIKQM	0	2	0	0	0	0	sp|P02662|CASA1_BOVIN	54	75
ELSKDIGSESTEDQAMEDIKQM	0	3	0	0	0	0	sp|P02662|CASA1_BOVIN	54	75
ELSKDIGSESTEDQAMEDIKQME	0	2	0	0	0	0	sp|P02662|CASA1_BOVIN	54	76
ELSKDIGSESTEDQAMEDIKQME	0	3	0	0	0	0	sp|P02662|CASA1_BOVIN	54	76
ELSKDIGSESTEDQAMEDIKQMEAE	0	2	0	0	0	0	sp|P02662|CASA1_BOVIN	54	78
EMPFPK	0	0	0	0	0	0	sp|P02666|CASB_BOVIN	123	128
EMPFPKYP	0	0	0	0	0	0	sp|P02666|CASB_BOVIN	123	130
EMPFPKYP	0	0	1	0	0	0	sp|P02666|CASB_BOVIN	123	130
EMPFPKYPV	0	0	0	0	0	0	sp|P02666|CASB_BOVIN	123	131
EMPFPKYPVE	0	0	1	0	0	0	sp|P02666|CASB_BOVIN	123	132
EMPFPKYPVEP	0	0	0	0	0	0	sp|P02666|CASB_BOVIN	123	133
EMPFPKYPVEP	0	0	1	0	0	0	sp|P02666|CASB_BOVIN	123	133
EMPFPKYPVEPF	0	0	1	0	0	0	sp|P02666|CASB_BOVIN	123	134
EMPFPKYPVEPF	0	0	0	0	0	0	sp|P02666|CASB_BOVIN	123	134
EMPFPKYPVEPF	0	0	0	1	0	0	sp|P02666|CASB_BOVIN	123	134
EMPFPKYPVEPF	0	0	1	1	0	0	sp|P02666|CASB_BOVIN	123	134
EMPFPKYPVEPFT	0	0	0	0	0	0	sp|P02666|CASB_BOVIN	123	135
EMPFPKYPVEPFT	0	0	1	0	0	0	sp|P02666|CASB_BOVIN	123	135
EMPFPKYPVEPFTE	0	0	0	0	0	0	sp|P02666|CASB_BOVIN	123	136
EMPFPKYPVEPFTE	0	0	1	0	0	0	sp|P02666|CASB_BOVIN	123	136
EMPFPKYPVEPFTES	0	0	1	0	0	0	sp|P02666|CASB_BOVIN	123	137
EMPFPKYPVEPFTES	0	0	0	0	0	0	sp|P02666|CASB_BOVIN	123	137
EMPFPKYPVEPFTESQ	0	0	1	0	0	0	sp|P02666|CASB_BOVIN	123	138
EMPFPKYPVEPFTESQ	0	0	0	0	0	0	sp|P02666|CASB_BOVIN	123	138
EMPFPKYPVEPFTESQ	0	0	0	0	0	1	sp|P02666|CASB_BOVIN	123	138
EMPFPKYPVEPFTESQS	0	0	0	0	0	0	sp|P02666|CASB_BOVIN	123	139
EMPFPKYPVEPFTESQSL	0	0	1	0	0	0	sp|P02666|CASB_BOVIN	123	140
EMPFPKYPVEPFTESQSL	0	0	0	0	0	1	sp|P02666|CASB_BOVIN	123	140
EMPFPKYPVEPFTESQSL	0	0	0	0	0	0	sp|P02666|CASB_BOVIN	123	140
EMPFPKYPVEPFTESQSLT	0	0	0	0	0	0	sp|P02666|CASB_BOVIN	123	141
EMPFPKYPVEPFTESQSLTL	0	0	0	0	0	0	sp|P02666|CASB_BOVIN	123	142
EMPFPKYPVEPFTESQSLTLTDVENL	0	0	0	0	0	1	sp|P02666|CASB_BOVIN	123	148
EMPFPKYPVEPFTESQSLTLTDVENL	0	0	1	0	0	0	sp|P02666|CASB_BOVIN	123	148
EMPFPKYPVEPFTESQSLTLTDVENLHL	0	0	0	0	0	0	sp|P02666|CASB_BOVIN	123	150
EMPFPKYPVEPFTESQSLTLTDVENLHL	0	0	1	0	0	0	sp|P02666|CASB_BOVIN	123	150
EMPFPKYPVEPFTESQSLTLTDVENLHLP	0	0	1	0	0	0	sp|P02666|CASB_BOVIN	123	151
EMPFPKYPVEPFTESQSLTLTDVENLHLP	0	0	0	0	0	0	sp|P02666|CASB_BOVIN	123	151
EMPFPKYPVEPFTESQSLTLTDVENLHLP	0	0	0	0	0	1	sp|P02666|CASB_BOVIN	123	151
EMPFPKYPVEPFTESQSLTLTDVENLHLPL	0	0	0	0	0	0	sp|P02666|CASB_BOVIN	123	152
EMPFPKYPVEPFTESQSLTLTDVENLHLPLP	0	0	1	0	0	0	sp|P02666|CASB_BOVIN	123	153
EMPFPKYPVEPFTESQSLTLTDVENLHLPLP	0	0	0	0	0	0	sp|P02666|CASB_BOVIN	123	153
EMPFPKYPVEPFTESQSLTLTDVENLHLPLPL	0	0	1	0	0	0	sp|P02666|CASB_BOVIN	123	154
EMPFPKYPVEPFTESQSLTLTDVENLHLPLPL	0	0	0	0	0	0	sp|P02666|CASB_BOVIN	123	154
EMPFPKYPVEPFTESQSLTLTDVENLHLPLPL	0	0	0	0	0	1	sp|P02666|CASB_BOVIN	123	154
EMPFPKYPVEPFTESQSLTLTDVENLHLPLPLL	0	0	0	0	0	1	sp|P02666|CASB_BOVIN	123	155
EMPFPKYPVEPFTESQSLTLTDVENLHLPLPLL	0	0	0	0	0	0	sp|P02666|CASB_BOVIN	123	155
EMPFPKYPVEPFTESQSLTLTDVENLHLPLPLL	0	0	1	0	0	0	sp|P02666|CASB_BOVIN	123	155
EMPFPKYPVEPFTESQSLTLTDVENLHLPLPLLQ	0	0	0	0	0	0	sp|P02666|CASB_BOVIN	123	156
EMPFPKYPVEPFTESQSLTLTDVENLHLPLPLLQ	0	0	0	0	0	2	sp|P02666|CASB_BOVIN	123	156
EMPFPKYPVEPFTESQSLTLTDVENLHLPLPLLQ	0	0	0	0	0	1	sp|P02666|CASB_BOVIN	123	156
EMPFPKYPVEPFTESQSLTLTDVENLHLPLPLLQ	0	0	1	0	0	0	sp|P02666|CASB_BOVIN	123	156
EMPFPKYPVEPFTESQSLTLTDVENLHLPLPLLQS	0	0	1	0	0	0	sp|P02666|CASB_BOVIN	123	157
EMPFPKYPVEPFTESQSLTLTDVENLHLPLPLLQS	0	0	0	0	0	0	sp|P02666|CASB_BOVIN	123	157
EMPFPKYPVEPFTESQSLTLTDVENLHLPLPLLQS	0	0	0	0	0	2	sp|P02666|CASB_BOVIN	123	157
EMPFPKYPVEPFTESQSLTLTDVENLHLPLPLLQS	0	0	0	0	0	1	sp|P02666|CASB_BOVIN	123	157
EMPFPKYPVEPFTESQSLTLTDVENLHLPLPLLQSW	0	0	1	0	0	0	sp|P02666|CASB_BOVIN	123	158
EMPFPKYPVEPFTESQSLTLTDVENLHLPLPLLQSW	0	0	0	0	0	0	sp|P02666|CASB_BOVIN	123	158
EMPFPKYPVEPFTESQSLTLTDVENLHLPLPLLQSW	0	0	0	0	0	1	sp|P02666|CASB_BOVIN	123	158
EMPFPKYPVEPFTESQSLTLTDVENLHLPLPLLQSWM	0	0	0	0	0	2	sp|P02666|CASB_BOVIN	123	159
EMPFPKYPVEPFTESQSLTLTDVENLHLPLPLLQSWM	0	0	0	0	0	0	sp|P02666|CASB_BOVIN	123	159
ENLHLPLP	0	0	0	0	0	0	sp|P02666|CASB_BOVIN	146	153
ENLHLPLPL	0	0	0	0	0	0	sp|P02666|CASB_BOVIN	146	154
ENLHLPLPLL	0	0	0	0	0	0	sp|P02666|CASB_BOVIN	146	155
ENLHLPLPLLQ	0	0	0	0	0	0	sp|P02666|CASB_BOVIN	146	156
ENLHLPLPLLQ	0	0	0	0	0	1	sp|P02666|CASB_BOVIN	146	156
EPFTESQSLTLTDVENLHLPLPL	0	0	0	0	0	1	sp|P02666|CASB_BOVIN	132	154
EPLPIKV	0	0	0	0	0	0	tr|F1MXF5|F1MXF5_BOVIN	2692	2698
EPMIGVNQ	0	0	0	0	0	0	sp|P02662|CASA1_BOVIN	148	155
EPMIGVNQ	0	0	0	0	0	1	sp|P02662|CASA1_BOVIN	148	155
EPMIGVNQE	0	0	1	0	0	0	sp|P02662|CASA1_BOVIN	148	156
EPMIGVNQE	0	0	0	0	0	0	sp|P02662|CASA1_BOVIN	148	156
EPMIGVNQEL	0	0	1	0	0	0	sp|P02662|CASA1_BOVIN	148	157
EPMIGVNQEL	0	0	0	0	0	0	sp|P02662|CASA1_BOVIN	148	157
EPMIGVNQEL	0	0	0	0	0	1	sp|P02662|CASA1_BOVIN	148	157
EPMIGVNQELA	0	0	1	0	0	0	sp|P02662|CASA1_BOVIN	148	158
EPMIGVNQELA	0	0	0	0	0	0	sp|P02662|CASA1_BOVIN	148	158
EPPGVVGGPGEKAKPLVL	0	0	0	0	0	0	tr|F1N4Q3|F1N4Q3_BOVIN	136	153
EPPKPDKGKGPP	0	0	0	1	0	0	tr|E1B808|E1B808_BOVIN	834	845
EPVKAAEVPAPIRDLSVKDST	0	2	0	0	0	0	tr|F1N757|F1N757_BOVIN	28397	28417
EPVLGPVR	0	0	0	0	0	0	sp|P02666|CASB_BOVIN	210	217
EPVLGPVRGP	0	0	0	0	0	0	sp|P02666|CASB_BOVIN	210	219
EPVLGPVRGPF	0	0	0	0	0	0	sp|P02666|CASB_BOVIN	210	220
EPVLGPVRGPFP	0	0	0	0	0	0	sp|P02666|CASB_BOVIN	210	221
EPVLGPVRGPFP	0	0	0	1	0	0	sp|P02666|CASB_BOVIN	210	221
EPVLGPVRGPFPI	0	0	0	0	0	0	sp|P02666|CASB_BOVIN	210	222
EPVLGPVRGPFPI	0	0	0	1	0	0	sp|P02666|CASB_BOVIN	210	222
EPVLGPVRGPFPII	0	0	0	0	0	0	sp|P02666|CASB_BOVIN	210	223
EPVLGPVRGPFPII	0	0	0	1	0	0	sp|P02666|CASB_BOVIN	210	223
EPVLGPVRGPFPIIV	0	0	0	0	0	0	sp|P02666|CASB_BOVIN	210	224
EPVLGPVRGPFPIIV	0	0	0	1	0	0	sp|P02666|CASB_BOVIN	210	224
EPVLPEVRLP	0	0	0	0	0	0	tr|E1BM58|E1BM58_BOVIN	440	449
EPVLPLEEGGVP	0	0	0	0	0	0	tr|F1MGX3|F1MGX3_BOVIN	224	235
EQKHIQKEDVPSERYL	0	0	0	0	0	0	sp|P02662|CASA1_BOVIN	92	107
EQLLRLK	0	0	0	0	0	0	sp|P02662|CASA1_BOVIN	111	117
EQLSTSEENSKKTVD	0	1	0	0	0	0	sp|P02663|CASA2_BOVIN	141	155
EQLSTSEENSKKTVDMESTEVFTKK	0	3	0	0	0	0	sp|P02663|CASA2_BOVIN	141	165
EQQQTEDELQDK	0	0	0	0	0	0	sp|P02666|CASB_BOVIN	52	63
EQQQTEDELQDKIHPF	0	0	0	0	0	0	sp|P02666|CASB_BOVIN	52	67
EREIKFLDVLELAEKFWYD	0	0	0	0	0	0	tr|F1N6H4|F1N6H4_BOVIN	5880	5898
ERLHSMKEGIHAQ	0	0	0	0	0	0	sp|P02662|CASA1_BOVIN	133	145
ERYLGYLE	0	0	0	0	0	0	sp|P02662|CASA1_BOVIN	104	111
ERYLGYLEQ	0	0	0	0	0	0	sp|P02662|CASA1_BOVIN	104	112
ERYLGYLEQL	0	0	0	0	0	0	sp|P02662|CASA1_BOVIN	104	113
ERYLGYLEQLL	0	0	0	0	0	0	sp|P02662|CASA1_BOVIN	104	114
ERYLGYLEQLLRL	0	0	0	0	0	0	sp|P02662|CASA1_BOVIN	104	116
ERYLGYLEQLLRLK	0	0	0	0	0	0	sp|P02662|CASA1_BOVIN	104	117
ERYLGYLEQLLRLKKY	0	0	0	0	0	0	sp|P02662|CASA1_BOVIN	104	119
ERYLGYLEQLLRLKKYK	0	0	0	0	0	0	sp|P02662|CASA1_BOVIN	104	120
ESAEVATEEVK	0	1	0	0	0	0	sp|P02663|CASA2_BOVIN	75	85
ESQSLTLTDVENLHLPLPL	0	0	0	0	0	0	sp|P02666|CASB_BOVIN	136	154
ESTEVFTKKTK	0	1	0	0	0	0	sp|P02663|CASA2_BOVIN	157	167
ESTEVFTKKTKLTEEEKNRL	0	0	0	0	0	0	sp|P02663|CASA2_BOVIN	157	176
ETKKPAIKQEAVPDMEDSPPVSDSDEQQESVRAAPERS	0	3	0	0	0	0	tr|E1BCR2|E1BCR2_BOVIN	790	827
EVFGKEKVN	0	0	0	0	0	0	sp|P02662|CASA1_BOVIN	45	53
EVFGKEKVN	0	0	0	1	0	0	sp|P02662|CASA1_BOVIN	45	53
EVFGKEKVNEL	0	0	0	0	0	0	sp|P02662|CASA1_BOVIN	45	55
EVKITVDDKHYQK	0	0	0	0	0	0	sp|P02663|CASA2_BOVIN	83	95
EVLNENLLR	0	0	0	0	0	0	sp|P02662|CASA1_BOVIN	29	37
EVLNENLLRF	0	0	0	0	0	0	sp|P02662|CASA1_BOVIN	29	38
EVLNENLLRFF	0	0	0	0	0	0	sp|P02662|CASA1_BOVIN	29	39
EVLNENLLRFFVAPFPEVF	0	0	0	0	0	1	sp|P02662|CASA1_BOVIN	29	47
FALPQYLK	0	0	0	0	0	0	sp|P02663|CASA2_BOVIN	189	196
FALPQYLKT	0	0	0	0	0	0	sp|P02663|CASA2_BOVIN	189	197
FALPQYLKTVYQHQ	0	0	0	0	0	0	sp|P02663|CASA2_BOVIN	189	202
FALPQYLKTVYQHQKA	0	0	0	0	0	0	sp|P02663|CASA2_BOVIN	189	204
FAQTQSLVYPFPGPIPN	0	0	0	0	0	0	sp|P02666|CASB_BOVIN	67	83
FEPRPG	0	0	0	0	0	0	sp|Q2VWH6|FEZF2_BOVIN	46	51
FFVAPFPEVF	0	0	0	0	0	0	sp|P02662|CASA1_BOVIN	38	47
FFVAPFPEVFGKEKVN	0	0	0	0	0	0	sp|P02662|CASA1_BOVIN	38	53
FFVAPFPEVFGKEKVNELSKDIGSESTEDQAMEDIK	0	2	0	0	0	0	sp|P02662|CASA1_BOVIN	38	73
FGKEKVNE	0	0	0	0	0	0	sp|P02662|CASA1_BOVIN	47	54
FGKEKVNEL	0	0	0	0	0	0	sp|P02662|CASA1_BOVIN	47	55
FHSLEDKL	0	1	0	0	0	0	sp|P31098|OSTK_BOVIN	242	249
FLEILYSTDP	0	0	0	0	0	0	sp|Q0VCA5|SAMH1_BOVIN	416	425
FLKKISQR	0	0	0	0	0	0	sp|P02663|CASA2_BOVIN	178	185
FLKKISQRY	0	0	0	0	0	0	sp|P02663|CASA2_BOVIN	178	186
FLKKISQRYQ	0	0	0	0	0	0	sp|P02663|CASA2_BOVIN	178	187
FLLYQEPVL	0	0	0	0	0	0	sp|P02666|CASB_BOVIN	205	213
FLLYQEPVLGPVRGP	0	0	0	0	0	0	sp|P02666|CASB_BOVIN	205	219
FLLYQEPVLGPVRGPFPIIV	0	0	0	0	0	0	sp|P02666|CASB_BOVIN	205	224
FLPYPYYAKPA	0	0	0	0	0	0	sp|P02668|CASK_BOVIN	76	86
FLQPEVM	0	0	1	0	0	0	sp|P02666|CASB_BOVIN	102	108
FLQPEVMGV	0	0	0	0	0	0	sp|P02666|CASB_BOVIN	102	110
FPDVVPLQPE	0	0	0	0	0	0	tr|F6RL69|F6RL69_BOVIN	223	232
FPEVFGK	0	0	0	0	0	0	sp|P02662|CASA1_BOVIN	43	49
FPEVFGKEKVN	0	0	0	0	0	0	sp|P02662|CASA1_BOVIN	43	53
FPGPIPNSLPQ	0	0	0	0	0	0	sp|P02666|CASB_BOVIN	77	87
FPGPIPNSLPQNIPPL	0	0	0	0	0	0	sp|P02666|CASB_BOVIN	77	92
FPKYPVE	0	0	0	0	0	0	sp|P02666|CASB_BOVIN	126	132
FPKYPVEP	0	0	0	0	0	0	sp|P02666|CASB_BOVIN	126	133
FPKYPVEPF	0	0	0	0	0	0	sp|P02666|CASB_BOVIN	126	134
FPKYPVEPFT	0	0	0	0	0	0	sp|P02666|CASB_BOVIN	126	135
FPKYPVEPFTE	0	0	0	0	0	0	sp|P02666|CASB_BOVIN	126	136
FPKYPVEPFTES	0	0	0	0	0	0	sp|P02666|CASB_BOVIN	126	137
FPKYPVEPFTESQ	0	0	0	0	0	0	sp|P02666|CASB_BOVIN	126	138
FPKYPVEPFTESQSL	0	0	0	0	0	0	sp|P02666|CASB_BOVIN	126	140
FPPGTG	0	0	0	0	0	0	tr|A5PKC2|A5PKC2_BOVIN	226	231
FPPQSVLSL	0	0	0	0	0	0	sp|P02666|CASB_BOVIN	172	180
FQSEEQQQTED	0	1	0	0	0	0	sp|P02666|CASB_BOVIN	48	58
FQSEEQQQTEDELQDKIHP	0	0	0	0	0	0	sp|P02666|CASB_BOVIN	48	66
FQSEEQQQTEDELQDKIHPF	0	0	0	0	0	0	sp|P02666|CASB_BOVIN	48	67
FQSEEQQQTEDELQDKIHPF	0	1	0	0	0	0	sp|P02666|CASB_BOVIN	48	67
FQSEEQQQTEDELQDKIHPFA	0	1	0	0	0	0	sp|P02666|CASB_BOVIN	48	68
FQSEEQQQTEDELQDKIHPFAQ	0	1	0	0	0	0	sp|P02666|CASB_BOVIN	48	69
FQSEEQQQTEDELQDKIHPFAQT	0	1	0	0	0	0	sp|P02666|CASB_BOVIN	48	70
FQSEEQQQTEDELQDKIHPFAQTQ	0	0	0	0	0	0	sp|P02666|CASB_BOVIN	48	71
FQSEEQQQTEDELQDKIHPFAQTQ	0	1	0	0	0	0	sp|P02666|CASB_BOVIN	48	71
FQSEEQQQTEDELQDKIHPFAQTQSL	0	1	0	0	0	0	sp|P02666|CASB_BOVIN	48	73
FRQFYQLDAYPS	0	0	0	0	0	0	sp|P02662|CASA1_BOVIN	165	176
FSDIPNPIGS	0	0	0	0	0	0	sp|P02662|CASA1_BOVIN	194	203
FSDIPNPIGSE	0	0	0	0	0	0	sp|P02662|CASA1_BOVIN	194	204
FSDIPNPIGSEN	0	0	0	0	0	0	sp|P02662|CASA1_BOVIN	194	205
FSDIPNPIGSEN	0	0	0	0	0	1	sp|P02662|CASA1_BOVIN	194	205
FSDIPNPIGSENS	0	0	0	0	0	0	sp|P02662|CASA1_BOVIN	194	206
FSDIPNPIGSENSE	0	0	0	0	0	0	sp|P02662|CASA1_BOVIN	194	207
FSDIPNPIGSENSE	0	0	0	0	0	1	sp|P02662|CASA1_BOVIN	194	207
FSDIPNPIGSENSEK	0	0	0	0	0	0	sp|P02662|CASA1_BOVIN	194	208
FSDIPNPIGSENSEK	0	0	0	0	0	1	sp|P02662|CASA1_BOVIN	194	208
FSDIPNPIGSENSEKT	0	0	0	0	0	0	sp|P02662|CASA1_BOVIN	194	209
FSDIPNPIGSENSEKT	0	0	0	0	0	1	sp|P02662|CASA1_BOVIN	194	209
FSDIPNPIGSENSEKTT	0	0	0	0	0	0	sp|P02662|CASA1_BOVIN	194	210
FSDIPNPIGSENSEKTT	0	0	0	0	0	1	sp|P02662|CASA1_BOVIN	194	210
FSDIPNPIGSENSEKTTM	0	0	1	0	0	0	sp|P02662|CASA1_BOVIN	194	211
FSDIPNPIGSENSEKTTMP	0	0	1	0	0	0	sp|P02662|CASA1_BOVIN	194	212
FSDIPNPIGSENSEKTTMP	0	0	0	0	0	0	sp|P02662|CASA1_BOVIN	194	212
FSDIPNPIGSENSEKTTMP	0	0	0	0	0	1	sp|P02662|CASA1_BOVIN	194	212
FSDIPNPIGSENSEKTTMPL	0	0	0	0	0	0	sp|P02662|CASA1_BOVIN	194	213
FSDIPNPIGSENSEKTTMPL	0	0	1	0	0	0	sp|P02662|CASA1_BOVIN	194	213
FSDIPNPIGSENSEKTTMPL	0	0	0	0	0	1	sp|P02662|CASA1_BOVIN	194	213
FSDIPNPIGSENSEKTTMPLW	0	0	1	0	0	0	sp|P02662|CASA1_BOVIN	194	214
FSDIPNPIGSENSEKTTMPLW	0	0	0	0	0	0	sp|P02662|CASA1_BOVIN	194	214
FSDIPNPIGSENSEKTTMPLW	0	0	0	0	0	1	sp|P02662|CASA1_BOVIN	194	214
FSDKIAKYIPIQ	0	0	0	0	0	0	sp|P02668|CASK_BOVIN	39	50
FSDKIAKYIPIQY	0	0	0	0	0	0	sp|P02668|CASK_BOVIN	39	51
FSDKIAKYIPIQYVL	0	0	0	0	0	0	sp|P02668|CASK_BOVIN	39	53
FTESQSLTLTDVENLHLPLPLLQSW	0	0	0	0	0	1	sp|P02666|CASB_BOVIN	134	158
FTKKTKLTEEEKNRLN	0	0	0	0	0	0	sp|P02663|CASA2_BOVIN	162	177
FVAPFPEV	0	0	0	0	0	0	sp|P02662|CASA1_BOVIN	39	46
FVAPFPEVF	0	0	0	0	0	0	sp|P02662|CASA1_BOVIN	39	47
FVAPFPEVFG	0	0	0	0	0	0	sp|P02662|CASA1_BOVIN	39	48
FVAPFPEVFGK	0	0	0	0	0	0	sp|P02662|CASA1_BOVIN	39	49
FVAPFPEVFGKE	0	0	0	0	0	0	sp|P02662|CASA1_BOVIN	39	50
FVAPFPEVFGKEK	0	0	0	0	0	0	sp|P02662|CASA1_BOVIN	39	51
FVAPFPEVFGKEKV	0	0	0	0	0	0	sp|P02662|CASA1_BOVIN	39	52
FVAPFPEVFGKEKVN	0	0	0	0	0	0	sp|P02662|CASA1_BOVIN	39	53
FVAPFPEVFGKEKVN	0	0	0	0	0	1	sp|P02662|CASA1_BOVIN	39	53
FVAPFPEVFGKEKVNE	0	0	0	0	0	0	sp|P02662|CASA1_BOVIN	39	54
FVAPFPEVFGKEKVNEL	0	0	0	0	0	0	sp|P02662|CASA1_BOVIN	39	55
FVAPFPEVFGKEKVNEL	0	0	0	0	0	1	sp|P02662|CASA1_BOVIN	39	55
FVAPFPEVFGKEKVNELSK	0	0	0	0	0	0	sp|P02662|CASA1_BOVIN	39	57
FVAPFPEVFGKEKVNELSKD	0	0	0	0	0	0	sp|P02662|CASA1_BOVIN	39	58
FVAPFPEVFGKEKVNELSKDIG	0	0	0	0	0	0	sp|P02662|CASA1_BOVIN	39	60
FVAPFPEVFGKEKVNELSKDIG	0	0	0	0	0	1	sp|P02662|CASA1_BOVIN	39	60
FVAPFPEVFGKEKVNELSKDIGSESTEDQAMEDIK	0	2	0	0	0	0	sp|P02662|CASA1_BOVIN	39	73
FVAPFPEVFGKEKVNELSKDIGSESTEDQAMEDIK	0	3	0	0	0	0	sp|P02662|CASA1_BOVIN	39	73
FVAPFPEVFGKEKVNELSKDIGSESTEDQAMEDIK	0	1	0	0	0	0	sp|P02662|CASA1_BOVIN	39	73
FVAPFPEVFGKEKVNELSKDIGSESTEDQAMEDIKQ	0	2	0	0	0	0	sp|P02662|CASA1_BOVIN	39	74
FVAPFPEVFGKEKVNELSKDIGSESTEDQAMEDIKQM	0	2	0	0	0	0	sp|P02662|CASA1_BOVIN	39	75
FVAPFPEVFGKEKVNELSKDIGSESTEDQAMEDIKQM	0	3	0	0	0	0	sp|P02662|CASA1_BOVIN	39	75
FVAPFPEVFGKEKVNELSKDIGSESTEDQAMEDIKQME	0	3	0	0	0	0	sp|P02662|CASA1_BOVIN	39	76
FVAPFPEVFGKEKVNELSKDIGSESTEDQAMEDIKQMEAE	0	2	0	0	0	0	sp|P02662|CASA1_BOVIN	39	78
FYPELFR	0	0	0	0	0	0	sp|P02662|CASA1_BOVIN	160	166
FYPELFRQF	0	0	0	0	0	0	sp|P02662|CASA1_BOVIN	160	168
FYPELFRQFYQL	0	0	0	0	0	0	sp|P02662|CASA1_BOVIN	160	171
FYQKFPQY	0	0	0	0	0	0	sp|P02663|CASA2_BOVIN	103	110
FYQKFPQYLQY	0	0	0	0	0	0	sp|P02663|CASA2_BOVIN	103	113
FYQKFPQYLQYLYQGPIVLNPWDQVKR	0	0	0	0	0	0	sp|P02663|CASA2_BOVIN	103	129
FYQLDAYPSGAWYYVPLGTQYTDAPSFSDIPNPIGSENSEK	0	0	0	0	0	1	sp|P02662|CASA1_BOVIN	168	208
GAEVPDPEPLP	0	0	0	0	0	0	tr|F1MX26|F1MX26_BOVIN	377	387
GAGGQGLTVFGGVNSSSHT	0	0	0	0	0	0	sp|A0JNB0|FYN_BOVIN	55	73
GAIPGVPGVGGVPGVGIPAAAAAKAAAKA	0	0	0	0	0	0	tr|F1N0H9|F1N0H9_BOVIN	464	492
GAVGLGGVSPAAAAKAAK	0	1	0	0	0	0	sp|P04985|ELN_BOVIN	671	688
GAWYYVPLGTQ	0	0	0	0	0	0	sp|P02662|CASA1_BOVIN	177	187
GAWYYVPLGTQYTDAPSFSDIPNPIGSE	0	0	0	0	0	0	sp|P02662|CASA1_BOVIN	177	204
GAWYYVPLGTQYTDAPSFSDIPNPIGSEN	0	0	0	0	0	0	sp|P02662|CASA1_BOVIN	177	205
GAWYYVPLGTQYTDAPSFSDIPNPIGSENSE	0	0	0	0	0	1	sp|P02662|CASA1_BOVIN	177	207
GAWYYVPLGTQYTDAPSFSDIPNPIGSENSE	0	0	0	0	0	0	sp|P02662|CASA1_BOVIN	177	207
GAWYYVPLGTQYTDAPSFSDIPNPIGSENSEK	0	0	0	0	0	0	sp|P02662|CASA1_BOVIN	177	208
GAWYYVPLGTQYTDAPSFSDIPNPIGSENSEK	0	0	0	0	0	1	sp|P02662|CASA1_BOVIN	177	208
GAWYYVPLGTQYTDAPSFSDIPNPIGSENSEKT	0	0	0	0	0	0	sp|P02662|CASA1_BOVIN	177	209
GAWYYVPLGTQYTDAPSFSDIPNPIGSENSEKT	0	0	0	0	0	1	sp|P02662|CASA1_BOVIN	177	209
GAWYYVPLGTQYTDAPSFSDIPNPIGSENSEKTTMPL	0	0	0	0	0	1	sp|P02662|CASA1_BOVIN	177	213
GAWYYVPLGTQYTDAPSFSDIPNPIGSENSEKTTMPL	0	0	0	0	0	0	sp|P02662|CASA1_BOVIN	177	213
GAWYYVPLGTQYTDAPSFSDIPNPIGSENSEKTTMPL	0	0	0	0	0	2	sp|P02662|CASA1_BOVIN	177	213
GAWYYVPLGTQYTDAPSFSDIPNPIGSENSEKTTMPLW	0	0	0	0	0	1	sp|P02662|CASA1_BOVIN	177	214
GAWYYVPLGTQYTDAPSFSDIPNPIGSENSEKTTMPLW	0	0	0	0	0	2	sp|P02662|CASA1_BOVIN	177	214
GAWYYVPLGTQYTDAPSFSDIPNPIGSENSEKTTMPLW	0	0	1	0	0	0	sp|P02662|CASA1_BOVIN	177	214
GAWYYVPLGTQYTDAPSFSDIPNPIGSENSEKTTMPLW	0	0	0	0	0	0	sp|P02662|CASA1_BOVIN	177	214
GDSDLQLERI	0	0	0	0	0	0	sp|Q6B856|TBB2B_BOVIN	38	47
GDTHLGGEDFDNRLV	0	0	0	0	0	0	sp|Q27975|HS71A_BOVIN	224	238
GEDSASGDIETLHSK	0	0	0	0	0	0	sp|P18892|BT1A1_BOVIN	501	515
GEDSASGDIETLHSKLIPLQPSQGVP	0	0	0	0	0	1	sp|P18892|BT1A1_BOVIN	501	526
GEDSASGDIETLHSKLIPLQPSQGVP	0	0	0	0	0	0	sp|P18892|BT1A1_BOVIN	501	526
GEGPSTAMRAP	0	0	1	0	0	0	tr|F1MM81|F1MM81_BOVIN	1628	1638
GFIPLVIYLGF	0	0	0	0	0	0	sp|Q2KI08|TOM7_BOVIN	26	36
GIHAQQKEPM	0	0	0	0	0	0	sp|P02662|CASA1_BOVIN	141	150
GIHAQQKEPMIGVNQELA	0	0	0	0	0	0	sp|P02662|CASA1_BOVIN	141	158
GKEKVNELSKDIG	0	0	0	0	0	0	sp|P02662|CASA1_BOVIN	48	60
GKEKVNELSKDIG	0	1	0	0	0	0	sp|P02662|CASA1_BOVIN	48	60
GKEKVNELSKDIGS	0	1	0	0	0	0	sp|P02662|CASA1_BOVIN	48	61
GKEKVNELSKDIGSE	0	1	0	0	0	0	sp|P02662|CASA1_BOVIN	48	62
GKEKVNELSKDIGSESTE	0	2	0	0	0	0	sp|P02662|CASA1_BOVIN	48	65
GKEKVNELSKDIGSESTE	0	3	0	0	0	0	sp|P02662|CASA1_BOVIN	48	65
GKEKVNELSKDIGSESTED	0	2	0	0	0	0	sp|P02662|CASA1_BOVIN	48	66
GKEKVNELSKDIGSESTEDQ	0	2	0	0	0	0	sp|P02662|CASA1_BOVIN	48	67
GKEKVNELSKDIGSESTEDQA	0	2	0	0	0	0	sp|P02662|CASA1_BOVIN	48	68
GKEKVNELSKDIGSESTEDQAM	0	2	0	0	0	0	sp|P02662|CASA1_BOVIN	48	69
GKEKVNELSKDIGSESTEDQAMED	0	2	0	0	0	0	sp|P02662|CASA1_BOVIN	48	71
GKEKVNELSKDIGSESTEDQAMEDIK	0	1	0	0	0	0	sp|P02662|CASA1_BOVIN	48	73
GKEKVNELSKDIGSESTEDQAMEDIK	0	2	0	0	0	0	sp|P02662|CASA1_BOVIN	48	73
GKEKVNELSKDIGSESTEDQAMEDIK	0	3	0	0	0	0	sp|P02662|CASA1_BOVIN	48	73
GKEKVNELSKDIGSESTEDQAMEDIKQ	0	2	0	0	0	0	sp|P02662|CASA1_BOVIN	48	74
GKEKVNELSKDIGSESTEDQAMEDIKQ	0	3	0	0	0	0	sp|P02662|CASA1_BOVIN	48	74
GKEKVNELSKDIGSESTEDQAMEDIKQM	0	2	0	0	0	0	sp|P02662|CASA1_BOVIN	48	75
GKEKVNELSKDIGSESTEDQAMEDIKQM	0	3	0	0	0	0	sp|P02662|CASA1_BOVIN	48	75
GKEKVNELSKDIGSESTEDQAMEDIKQMEAE	0	2	0	0	0	0	sp|P02662|CASA1_BOVIN	48	78
GLIKEQYEGRL	0	0	0	0	0	0	sp|P81265|PIGR_BOVIN	402	412
GLNYYQQKPV	0	0	0	0	0	0	sp|P02668|CASK_BOVIN	60	69
GLNYYQQKPVA	0	0	0	0	0	0	sp|P02668|CASK_BOVIN	60	70
GLPQEVLNENLLR	0	0	0	0	0	0	sp|P02662|CASA1_BOVIN	25	37
GLPQEVLNENLLRF	0	0	0	0	0	0	sp|P02662|CASA1_BOVIN	25	38
GLPQEVLNENLLRFF	0	0	0	0	0	0	sp|P02662|CASA1_BOVIN	25	39
GLPQEVLNENLLRFFVAPFPEVFGK	0	0	0	0	0	0	sp|P02662|CASA1_BOVIN	25	49
GLPQEVLNENLLRFFVAPFPEVFGKEKVN	0	0	0	0	0	1	sp|P02662|CASA1_BOVIN	25	53
GNPEVPVH	0	0	0	0	0	0	tr|Q58DP6|Q58DP6_BOVIN	137	144
GPEPLRRPV	0	0	0	0	0	0	sp|Q2KI89|ARMC9_BOVIN	646	654
GPIPNSLPQ	0	0	0	0	0	1	sp|P02666|CASB_BOVIN	79	87
GPIVLNPWD	0	0	0	0	0	0	sp|P02663|CASA2_BOVIN	117	125
GPIVLNPWDQ	0	0	0	0	0	0	sp|P02663|CASA2_BOVIN	117	126
GPIVLNPWDQV	0	0	0	0	0	0	sp|P02663|CASA2_BOVIN	117	127
GPIVLNPWDQVK	0	0	0	0	0	0	sp|P02663|CASA2_BOVIN	117	128
GPIVLNPWDQVK	0	0	0	0	0	1	sp|P02663|CASA2_BOVIN	117	128
GPIVLNPWDQVKR	0	0	0	0	0	0	sp|P02663|CASA2_BOVIN	117	129
GPIVLNPWDQVKR	0	0	0	0	0	1	sp|P02663|CASA2_BOVIN	117	129
GPIVLNPWDQVKRN	0	0	0	0	0	0	sp|P02663|CASA2_BOVIN	117	130
GPIVLNPWDQVKRN	0	0	0	0	0	1	sp|P02663|CASA2_BOVIN	117	130
GPLPLP	0	0	0	0	0	0	tr|F1MFJ7|F1MFJ7_BOVIN	85	90
GPVRGPFP	0	0	0	0	0	0	sp|P02666|CASB_BOVIN	214	221
GPVRGPFPI	0	0	0	0	0	0	sp|P02666|CASB_BOVIN	214	222
GPVRGPFPII	0	0	0	0	0	0	sp|P02666|CASB_BOVIN	214	223
GPVRGPFPIIV	0	0	0	0	0	0	sp|P02666|CASB_BOVIN	214	224
GRVSLVEDHIAEGSVAVR	0	0	0	0	0	0	sp|P18892|BT1A1_BOVIN	93	110
GTQYTDAPSFS	0	0	0	0	0	0	sp|P02662|CASA1_BOVIN	185	195
GTQYTDAPSFSDIPNPIGS	0	0	0	0	0	0	sp|P02662|CASA1_BOVIN	185	203
GTQYTDAPSFSDIPNPIGSE	0	0	0	0	0	0	sp|P02662|CASA1_BOVIN	185	204
GTQYTDAPSFSDIPNPIGSEN	0	0	0	0	0	0	sp|P02662|CASA1_BOVIN	185	205
GTQYTDAPSFSDIPNPIGSEN	0	0	0	0	0	1	sp|P02662|CASA1_BOVIN	185	205
GTQYTDAPSFSDIPNPIGSENSE	0	0	0	0	0	0	sp|P02662|CASA1_BOVIN	185	207
GTQYTDAPSFSDIPNPIGSENSE	0	0	0	0	0	1	sp|P02662|CASA1_BOVIN	185	207
GTQYTDAPSFSDIPNPIGSENSEK	0	0	0	0	0	0	sp|P02662|CASA1_BOVIN	185	208
GTQYTDAPSFSDIPNPIGSENSEK	0	0	0	0	0	1	sp|P02662|CASA1_BOVIN	185	208
GTQYTDAPSFSDIPNPIGSENSEKT	0	0	0	0	0	0	sp|P02662|CASA1_BOVIN	185	209
GTQYTDAPSFSDIPNPIGSENSEKT	0	0	0	0	0	1	sp|P02662|CASA1_BOVIN	185	209
GTQYTDAPSFSDIPNPIGSENSEKTTMP	0	0	1	0	0	0	sp|P02662|CASA1_BOVIN	185	212
GTQYTDAPSFSDIPNPIGSENSEKTTMP	0	0	0	0	0	0	sp|P02662|CASA1_BOVIN	185	212
GTQYTDAPSFSDIPNPIGSENSEKTTMP	0	0	0	0	0	1	sp|P02662|CASA1_BOVIN	185	212
GTQYTDAPSFSDIPNPIGSENSEKTTMPL	0	0	0	0	0	0	sp|P02662|CASA1_BOVIN	185	213
GTQYTDAPSFSDIPNPIGSENSEKTTMPL	0	0	0	0	0	1	sp|P02662|CASA1_BOVIN	185	213
GTQYTDAPSFSDIPNPIGSENSEKTTMPL	0	0	1	0	0	0	sp|P02662|CASA1_BOVIN	185	213
GTQYTDAPSFSDIPNPIGSENSEKTTMPLW	0	0	1	0	0	0	sp|P02662|CASA1_BOVIN	185	214
GTQYTDAPSFSDIPNPIGSENSEKTTMPLW	0	0	0	0	0	0	sp|P02662|CASA1_BOVIN	185	214
GTQYTDAPSFSDIPNPIGSENSEKTTMPLW	0	0	0	0	0	1	sp|P02662|CASA1_BOVIN	185	214
GTWNPGRPEPG	0	0	0	0	0	0	sp|P02672|FIBA_BOVIN	311	321
GVPGAVSPAAAAKAAAKAAK	0	1	0	0	0	0	tr|F1N0H9|F1N0H9_BOVIN	386	405
GVSKVKEAM	0	0	1	0	0	0	sp|P02666|CASB_BOVIN	109	117
GVSKVKEAM	0	0	0	0	0	0	sp|P02666|CASB_BOVIN	109	117
GVSKVKEAMA	0	0	0	0	0	0	sp|P02666|CASB_BOVIN	109	118
GVSKVKEAMAP	0	0	0	0	0	0	sp|P02666|CASB_BOVIN	109	119
GVSKVKEAMAP	0	0	1	0	0	0	sp|P02666|CASB_BOVIN	109	119
GVSKVKEAMAPK	0	0	1	0	0	0	sp|P02666|CASB_BOVIN	109	120
GVSKVKEAMAPK	0	0	0	0	0	0	sp|P02666|CASB_BOVIN	109	120
GVSKVKEAMAPKH	0	0	0	0	0	0	sp|P02666|CASB_BOVIN	109	121
GVSKVKEAMAPKHK	0	0	0	0	0	0	sp|P02666|CASB_BOVIN	109	122
GVSKVKEAMAPKHKE	0	0	0	0	0	0	sp|P02666|CASB_BOVIN	109	123
GVSKVKEAMAPKHKEMPFPK	0	0	0	0	0	0	sp|P02666|CASB_BOVIN	109	128
GVSKVKEAMAPKHKEMPFPK	0	0	1	0	0	0	sp|P02666|CASB_BOVIN	109	128
GVSKVKEAMAPKHKEMPFPKYPVEPF	0	0	0	0	0	0	sp|P02666|CASB_BOVIN	109	134
GVSKVKEAMAPKHKEMPFPKYPVEPF	0	0	1	0	0	0	sp|P02666|CASB_BOVIN	109	134
GVSKVKEAMAPKHKEMPFPKYPVEPFTESQ	0	0	0	0	0	0	sp|P02666|CASB_BOVIN	109	138
GVVDRTKGAVTG	0	0	0	0	0	0	sp|Q9TUM6|PLIN2_BOVIN	136	147
GYIPQAFP	0	0	0	0	0	0	tr|F6RYN2|F6RYN2_BOVIN	569	576
GYLEQLLR	0	0	0	0	0	0	sp|P02662|CASA1_BOVIN	108	115
GYLEQLLRL	0	0	0	0	0	0	sp|P02662|CASA1_BOVIN	108	116
GYLEQLLRLK	0	0	0	0	0	0	sp|P02662|CASA1_BOVIN	108	117
GYLEQLLRLKK	0	0	0	0	0	0	sp|P02662|CASA1_BOVIN	108	118
GYLEQLLRLKKY	0	0	0	0	0	0	sp|P02662|CASA1_BOVIN	108	119
GYLEQLLRLKKYK	0	0	0	0	0	0	sp|P02662|CASA1_BOVIN	108	120
GYLEQLLRLKKYKVPQ	0	0	0	0	0	0	sp|P02662|CASA1_BOVIN	108	123
GYLEQLLRLKKYKVPQLEIVPN	0	0	0	0	0	0	sp|P02662|CASA1_BOVIN	108	129
GYLEQLLRLKKYKVPQLEIVPN	0	0	0	0	0	1	sp|P02662|CASA1_BOVIN	108	129
GYLEQLLRLKKYKVPQLEIVPNSAE	0	1	0	0	0	0	sp|P02662|CASA1_BOVIN	108	132
GYLEQLLRLKKYKVPQLEIVPNSAEERL	0	1	0	0	0	0	sp|P02662|CASA1_BOVIN	108	135
GYLEQLLRLKKYKVPQLEIVPNSAEERLH	0	1	0	0	0	0	sp|P02662|CASA1_BOVIN	108	136
GYLEQLLRLKKYKVPQLEIVPNSAEERLHSM	0	1	0	0	0	0	sp|P02662|CASA1_BOVIN	108	138
GYLEQLLRLKKYKVPQLEIVPNSAEERLHSMK	0	1	0	0	0	0	sp|P02662|CASA1_BOVIN	108	139
HIQKEDMRLHRLPSRWSSR	0	0	0	0	0	0	sp|A6QP75|AL2CL_BOVIN	932	950
HIQKEDVPS	0	0	0	0	0	0	sp|P02662|CASA1_BOVIN	95	103
HIQKEDVPS	0	0	0	0	0	1	sp|P02662|CASA1_BOVIN	95	103
HIQKEDVPSE	0	0	0	0	0	0	sp|P02662|CASA1_BOVIN	95	104
HIQKEDVPSE	0	0	0	0	0	1	sp|P02662|CASA1_BOVIN	95	104
HIQKEDVPSER	0	0	0	0	0	0	sp|P02662|CASA1_BOVIN	95	105
HIQKEDVPSER	0	0	0	0	0	1	sp|P02662|CASA1_BOVIN	95	105
HIQKEDVPSERY	0	0	0	0	0	0	sp|P02662|CASA1_BOVIN	95	106
HIQKEDVPSERYL	0	0	0	0	0	0	sp|P02662|CASA1_BOVIN	95	107
HIQKEDVPSERYL	0	1	0	0	0	0	sp|P02662|CASA1_BOVIN	95	107
HIQKEDVPSERYL	0	0	0	0	0	1	sp|P02662|CASA1_BOVIN	95	107
HIQKEDVPSERYLG	0	0	0	0	0	0	sp|P02662|CASA1_BOVIN	95	108
HIQKEDVPSERYLG	0	0	0	0	0	1	sp|P02662|CASA1_BOVIN	95	108
HIQKEDVPSERYLGY	0	0	0	0	0	0	sp|P02662|CASA1_BOVIN	95	109
HIQKEDVPSERYLGYL	0	0	0	0	0	0	sp|P02662|CASA1_BOVIN	95	110
HIQKEDVPSERYLGYLE	0	0	0	0	0	0	sp|P02662|CASA1_BOVIN	95	111
HIQKEDVPSERYLGYLEQ	0	0	0	0	0	0	sp|P02662|CASA1_BOVIN	95	112
HIQKEDVPSERYLGYLEQL	0	0	0	0	0	0	sp|P02662|CASA1_BOVIN	95	113
HIQKEDVPSERYLGYLEQL	0	0	0	0	0	1	sp|P02662|CASA1_BOVIN	95	113
HIQKEDVPSERYLGYLEQLL	0	0	0	0	0	1	sp|P02662|CASA1_BOVIN	95	114
HIQKEDVPSERYLGYLEQLL	0	0	0	0	0	0	sp|P02662|CASA1_BOVIN	95	114
HIQKEDVPSERYLGYLEQLLR	0	0	0	0	0	0	sp|P02662|CASA1_BOVIN	95	115
HIQKEDVPSERYLGYLEQLLRL	0	0	0	0	0	0	sp|P02662|CASA1_BOVIN	95	116
HIQKEDVPSERYLGYLEQLLRL	0	0	0	0	0	1	sp|P02662|CASA1_BOVIN	95	116
HIQKEDVPSERYLGYLEQLLRLK	0	0	0	0	0	0	sp|P02662|CASA1_BOVIN	95	117
HIQKEDVPSERYLGYLEQLLRLKK	0	0	0	0	0	0	sp|P02662|CASA1_BOVIN	95	118
HIQKEDVPSERYLGYLEQLLRLKK	0	0	0	0	0	1	sp|P02662|CASA1_BOVIN	95	118
HIQKEDVPSERYLGYLEQLLRLKKY	0	0	0	0	0	1	sp|P02662|CASA1_BOVIN	95	119
HIQKEDVPSERYLGYLEQLLRLKKY	0	0	0	0	0	0	sp|P02662|CASA1_BOVIN	95	119
HIQKEDVPSERYLGYLEQLLRLKKYK	0	0	0	0	0	1	sp|P02662|CASA1_BOVIN	95	120
HIQKEDVPSERYLGYLEQLLRLKKYKVPQL	0	0	0	0	0	1	sp|P02662|CASA1_BOVIN	95	124
HIQKEDVPSERYLGYLEQLLRLKKYKVPQLEIVPN	0	0	0	0	0	1	sp|P02662|CASA1_BOVIN	95	129
HKEMPFP	0	0	0	0	0	0	sp|P02666|CASB_BOVIN	121	127
HKEMPFPK	0	0	1	0	0	0	sp|P02666|CASB_BOVIN	121	128
HKEMPFPK	0	0	0	0	0	0	sp|P02666|CASB_BOVIN	121	128
HKEMPFPKYP	0	0	0	0	0	0	sp|P02666|CASB_BOVIN	121	130
HKEMPFPKYPV	0	0	0	0	0	0	sp|P02666|CASB_BOVIN	121	131
HKEMPFPKYPVE	0	0	0	0	0	0	sp|P02666|CASB_BOVIN	121	132
HKEMPFPKYPVEP	0	0	0	0	0	0	sp|P02666|CASB_BOVIN	121	133
HKEMPFPKYPVEP	0	0	1	0	0	0	sp|P02666|CASB_BOVIN	121	133
HKEMPFPKYPVEPF	0	0	1	0	0	0	sp|P02666|CASB_BOVIN	121	134
HKEMPFPKYPVEPF	0	0	0	0	0	0	sp|P02666|CASB_BOVIN	121	134
HKEMPFPKYPVEPFT	0	0	0	0	0	0	sp|P02666|CASB_BOVIN	121	135
HKEMPFPKYPVEPFT	0	0	1	0	0	0	sp|P02666|CASB_BOVIN	121	135
HKEMPFPKYPVEPFTE	0	0	0	0	0	0	sp|P02666|CASB_BOVIN	121	136
HKEMPFPKYPVEPFTES	0	0	1	0	0	0	sp|P02666|CASB_BOVIN	121	137
HKEMPFPKYPVEPFTES	0	0	0	0	0	0	sp|P02666|CASB_BOVIN	121	137
HKEMPFPKYPVEPFTESQ	0	0	0	0	0	0	sp|P02666|CASB_BOVIN	121	138
HKEMPFPKYPVEPFTESQ	0	0	1	0	0	0	sp|P02666|CASB_BOVIN	121	138
HKEMPFPKYPVEPFTESQ	0	0	0	0	0	1	sp|P02666|CASB_BOVIN	121	138
HKEMPFPKYPVEPFTESQS	0	0	0	0	0	0	sp|P02666|CASB_BOVIN	121	139
HKEMPFPKYPVEPFTESQS	0	0	0	0	0	1	sp|P02666|CASB_BOVIN	121	139
HKEMPFPKYPVEPFTESQSL	0	0	1	0	0	0	sp|P02666|CASB_BOVIN	121	140
HKEMPFPKYPVEPFTESQSL	0	0	0	0	0	0	sp|P02666|CASB_BOVIN	121	140
HKEMPFPKYPVEPFTESQSL	0	0	0	0	0	1	sp|P02666|CASB_BOVIN	121	140
HKEMPFPKYPVEPFTESQSLT	0	0	0	0	0	0	sp|P02666|CASB_BOVIN	121	141
HKEMPFPKYPVEPFTESQSLT	0	0	0	0	0	1	sp|P02666|CASB_BOVIN	121	141
HKEMPFPKYPVEPFTESQSLTL	0	0	0	0	0	0	sp|P02666|CASB_BOVIN	121	142
HKEMPFPKYPVEPFTESQSLTL	0	2	0	0	0	0	sp|P02666|CASB_BOVIN	121	142
HKEMPFPKYPVEPFTESQSLTLT	0	0	0	0	0	0	sp|P02666|CASB_BOVIN	121	143
HKEMPFPKYPVEPFTESQSLTLT	0	0	0	0	0	1	sp|P02666|CASB_BOVIN	121	143
HKEMPFPKYPVEPFTESQSLTLTD	0	0	0	0	0	0	sp|P02666|CASB_BOVIN	121	144
HKEMPFPKYPVEPFTESQSLTLTD	0	0	0	0	0	1	sp|P02666|CASB_BOVIN	121	144
HKEMPFPKYPVEPFTESQSLTLTDVEN	0	0	0	0	0	1	sp|P02666|CASB_BOVIN	121	147
HKEMPFPKYPVEPFTESQSLTLTDVEN	0	0	0	0	0	2	sp|P02666|CASB_BOVIN	121	147
HKEMPFPKYPVEPFTESQSLTLTDVENL	0	0	0	0	0	1	sp|P02666|CASB_BOVIN	121	148
HKEMPFPKYPVEPFTESQSLTLTDVENL	0	0	0	0	0	0	sp|P02666|CASB_BOVIN	121	148
HKEMPFPKYPVEPFTESQSLTLTDVENL	0	0	0	0	0	2	sp|P02666|CASB_BOVIN	121	148
HKEMPFPKYPVEPFTESQSLTLTDVENLHL	0	0	0	0	0	1	sp|P02666|CASB_BOVIN	121	150
HKEMPFPKYPVEPFTESQSLTLTDVENLHLP	0	0	0	0	0	1	sp|P02666|CASB_BOVIN	121	151
HKEMPFPKYPVEPFTESQSLTLTDVENLHLPL	0	0	0	0	0	1	sp|P02666|CASB_BOVIN	121	152
HKEMPFPKYPVEPFTESQSLTLTDVENLHLPLP	0	0	1	0	0	0	sp|P02666|CASB_BOVIN	121	153
HKEMPFPKYPVEPFTESQSLTLTDVENLHLPLP	0	0	0	0	0	0	sp|P02666|CASB_BOVIN	121	153
HKEMPFPKYPVEPFTESQSLTLTDVENLHLPLP	0	0	0	0	0	1	sp|P02666|CASB_BOVIN	121	153
HKEMPFPKYPVEPFTESQSLTLTDVENLHLPLPL	0	0	0	0	0	1	sp|P02666|CASB_BOVIN	121	154
HKEMPFPKYPVEPFTESQSLTLTDVENLHLPLPL	0	0	0	0	0	0	sp|P02666|CASB_BOVIN	121	154
HKEMPFPKYPVEPFTESQSLTLTDVENLHLPLPL	0	0	1	0	0	0	sp|P02666|CASB_BOVIN	121	154
HKEMPFPKYPVEPFTESQSLTLTDVENLHLPLPLL	0	0	0	0	0	2	sp|P02666|CASB_BOVIN	121	155
HKEMPFPKYPVEPFTESQSLTLTDVENLHLPLPLL	0	0	0	0	0	1	sp|P02666|CASB_BOVIN	121	155
HKEMPFPKYPVEPFTESQSLTLTDVENLHLPLPLLQ	0	0	0	0	0	2	sp|P02666|CASB_BOVIN	121	156
HKEMPFPKYPVEPFTESQSLTLTDVENLHLPLPLLQ	0	0	0	0	0	1	sp|P02666|CASB_BOVIN	121	156
HKEMPFPKYPVEPFTESQSLTLTDVENLHLPLPLLQ	0	0	0	0	0	0	sp|P02666|CASB_BOVIN	121	156
HKEMPFPKYPVEPFTESQSLTLTDVENLHLPLPLLQS	0	0	0	0	0	1	sp|P02666|CASB_BOVIN	121	157
HKEMPFPKYPVEPFTESQSLTLTDVENLHLPLPLLQS	0	0	0	0	0	2	sp|P02666|CASB_BOVIN	121	157
HKEMPFPKYPVEPFTESQSLTLTDVENLHLPLPLLQS	0	0	1	0	0	0	sp|P02666|CASB_BOVIN	121	157
HKEMPFPKYPVEPFTESQSLTLTDVENLHLPLPLLQSW	0	0	0	0	0	1	sp|P02666|CASB_BOVIN	121	158
HKEMPFPKYPVEPFTESQSLTLTDVENLHLPLPLLQSW	0	0	0	0	0	0	sp|P02666|CASB_BOVIN	121	158
HKEMPFPKYPVEPFTESQSLTLTDVENLHLPLPLLQSWM	0	0	0	0	0	2	sp|P02666|CASB_BOVIN	121	159
HKEMPFPKYPVEPFTESQSLTLTDVENLHLPLPLLQSWM	0	0	0	0	0	1	sp|P02666|CASB_BOVIN	121	159
HLLPLP	0	0	0	0	0	0	tr|Q2KIW4|Q2KIW4_BOVIN	392	397
HLPLPLL	0	0	0	0	0	0	sp|P02666|CASB_BOVIN	149	155
HLPLPLLQ	0	0	0	0	0	0	sp|P02666|CASB_BOVIN	149	156
HLPLPLLQS	0	0	0	0	0	0	sp|P02666|CASB_BOVIN	149	157
HLPLPLLQSW	0	0	0	0	0	0	sp|P02666|CASB_BOVIN	149	158
HLPLPLLQSWM	0	0	1	0	0	0	sp|P02666|CASB_BOVIN	149	159
HLPLPLLQSWM	0	0	0	0	0	0	sp|P02666|CASB_BOVIN	149	159
HLPLPLLQSWMHQPHQPLPPT	0	0	0	0	0	1	sp|P02666|CASB_BOVIN	149	169
HLPLPLLQSWMHQPHQPLPPTVMFPPQ	0	0	0	0	0	1	sp|P02666|CASB_BOVIN	149	175
HLPLPLLQSWMHQPHQPLPPTVMFPPQSV	0	0	0	0	0	1	sp|P02666|CASB_BOVIN	149	177
HLPLPLLQSWMHQPHQPLPPTVMFPPQSVL	0	0	0	0	0	1	sp|P02666|CASB_BOVIN	149	178
HPHPHLSF	0	0	0	0	0	0	sp|P02668|CASK_BOVIN	119	126
HPIKHQ	0	0	0	0	0	0	sp|P02662|CASA1_BOVIN	19	24
HPIKHQGLPQ	0	0	0	0	0	0	sp|P02662|CASA1_BOVIN	19	28
HPIKHQGLPQ	0	0	0	0	0	1	sp|P02662|CASA1_BOVIN	19	28
HPIKHQGLPQE	0	0	0	0	0	0	sp|P02662|CASA1_BOVIN	19	29
HPIKHQGLPQEVLNENLL	0	0	0	0	0	0	sp|P02662|CASA1_BOVIN	19	36
HPIKHQGLPQEVLNENLLR	0	0	0	0	0	1	sp|P02662|CASA1_BOVIN	19	37
HPIKHQGLPQEVLNENLLR	0	0	0	0	0	0	sp|P02662|CASA1_BOVIN	19	37
HQGLPQE	0	0	0	0	0	0	sp|P02662|CASA1_BOVIN	23	29
HQGLPQEV	0	0	0	0	0	0	sp|P02662|CASA1_BOVIN	23	30
HQGLPQEVL	0	0	0	0	0	0	sp|P02662|CASA1_BOVIN	23	31
HQGLPQEVLN	0	0	0	0	0	0	sp|P02662|CASA1_BOVIN	23	32
HQGLPQEVLNENLL	0	0	0	0	0	0	sp|P02662|CASA1_BOVIN	23	36
HQGLPQEVLNENLLR	0	0	0	0	0	0	sp|P02662|CASA1_BOVIN	23	37
HQGLPQEVLNENLLRF	0	0	0	0	0	0	sp|P02662|CASA1_BOVIN	23	38
HQGLPQEVLNENLLRF	0	0	0	0	0	1	sp|P02662|CASA1_BOVIN	23	38
HQKAMKPW	0	0	0	0	0	0	sp|P02663|CASA2_BOVIN	201	208
HQKAMKPW	0	0	1	0	0	0	sp|P02663|CASA2_BOVIN	201	208
HQKAMKPWIQPK	0	0	0	0	0	0	sp|P02663|CASA2_BOVIN	201	212
HQPHQPLPP	0	0	0	0	0	0	sp|P02666|CASB_BOVIN	160	168
HQPHQPLPPT	0	0	0	0	0	0	sp|P02666|CASB_BOVIN	160	169
HQPHQPLPPT	0	0	0	0	0	1	sp|P02666|CASB_BOVIN	160	169
HQPHQPLPPTV	0	0	0	0	0	0	sp|P02666|CASB_BOVIN	160	170
HQPHQPLPPTVM	0	0	0	0	0	0	sp|P02666|CASB_BOVIN	160	171
HQPHQPLPPTVM	0	0	1	0	0	0	sp|P02666|CASB_BOVIN	160	171
HQPHQPLPPTVMF	0	0	0	0	0	0	sp|P02666|CASB_BOVIN	160	172
HQPHQPLPPTVMFPPQ	0	0	1	0	0	0	sp|P02666|CASB_BOVIN	160	175
HQPHQPLPPTVMFPPQ	0	0	0	0	0	0	sp|P02666|CASB_BOVIN	160	175
HQPHQPLPPTVMFPPQS	0	0	0	0	0	0	sp|P02666|CASB_BOVIN	160	176
HQPHQPLPPTVMFPPQSV	0	0	0	0	0	0	sp|P02666|CASB_BOVIN	160	177
HQPHQPLPPTVMFPPQSVL	0	0	0	0	0	0	sp|P02666|CASB_BOVIN	160	178
HQPHQPLPPTVMFPPQSVL	0	0	0	0	0	1	sp|P02666|CASB_BOVIN	160	178
HQPHQPLPPTVMFPPQSVLS	0	3	0	0	0	0	sp|P02666|CASB_BOVIN	160	179
HQPHQPLPPTVMFPPQSVLSL	0	0	0	0	0	0	sp|P02666|CASB_BOVIN	160	180
HQPHQPLPPTVMFPPQSVLSLSQSK	0	0	0	0	0	0	sp|P02666|CASB_BOVIN	160	184
HQPHQPLPPTVMFPPQSVLSLSQSKVLPVPQ	0	0	0	0	0	1	sp|P02666|CASB_BOVIN	160	190
HQPHQPLPPTVMFPPQSVLSLSQSKVLPVPQ	0	0	0	0	0	0	sp|P02666|CASB_BOVIN	160	190
HQPLPPT	0	0	0	0	0	0	sp|P02666|CASB_BOVIN	163	169
HQPLPPTV	0	0	0	0	0	0	sp|P02666|CASB_BOVIN	163	170
HQPLPPTVMFPPQ	0	0	0	0	0	0	sp|P02666|CASB_BOVIN	163	175
HQPLPPTVMFPPQ	0	0	1	0	0	0	sp|P02666|CASB_BOVIN	163	175
HSKLIPLQPSQGVP	0	0	0	0	0	0	sp|P18892|BT1A1_BOVIN	513	526
HSMKEGIHA	0	0	1	0	0	0	sp|P02662|CASA1_BOVIN	136	144
HSMKEGIHA	0	0	0	0	0	0	sp|P02662|CASA1_BOVIN	136	144
HSMKEGIHAQ	0	0	0	0	0	0	sp|P02662|CASA1_BOVIN	136	145
HSMKEGIHAQ	0	0	1	0	0	0	sp|P02662|CASA1_BOVIN	136	145
HSMKEGIHAQ	0	0	0	0	0	1	sp|P02662|CASA1_BOVIN	136	145
HSMKEGIHAQQKEPM	0	0	0	0	0	0	sp|P02662|CASA1_BOVIN	136	150
HSMKEGIHAQQKEPMIGVN	0	0	0	0	0	0	sp|P02662|CASA1_BOVIN	136	154
HSMKEGIHAQQKEPMIGVNQEL	0	0	0	0	0	0	sp|P02662|CASA1_BOVIN	136	157
HSMKEGIHAQQKEPMIGVNQEL	0	0	0	0	0	1	sp|P02662|CASA1_BOVIN	136	157
HSMKEGIHAQQKEPMIGVNQELA	0	0	0	0	0	1	sp|P02662|CASA1_BOVIN	136	158
HSMKEGIHAQQKEPMIGVNQELA	0	0	0	0	0	0	sp|P02662|CASA1_BOVIN	136	158
HSMKEGIHAQQKEPMIGVNQELAY	0	0	0	0	0	0	sp|P02662|CASA1_BOVIN	136	159
HSMKEGIHAQQKEPMIGVNQELAYFYPE	0	0	0	0	0	1	sp|P02662|CASA1_BOVIN	136	163
HSMKEGIHAQQKEPMIGVNQELAYFYPELFRQ	0	0	0	0	0	1	sp|P02662|CASA1_BOVIN	136	167
HSMKEGIHAQQKEPMIGVNQELAYFYPELFRQ	0	0	0	0	0	2	sp|P02662|CASA1_BOVIN	136	167
HSMKEGIHAQQKEPMIGVNQELAYFYPELFRQF	0	0	0	0	0	2	sp|P02662|CASA1_BOVIN	136	168
HVSSSEESIISQE	0	1	0	0	0	0	sp|P02663|CASA2_BOVIN	21	33
HYQKALNEIN	0	0	0	0	0	0	sp|P02663|CASA2_BOVIN	92	101
IAAIMQQGDTSIKPI	0	0	0	0	0	0	tr|Q0VCV0|Q0VCV0_BOVIN	10	24
IAKYIPIQ	0	0	0	0	0	0	sp|P02668|CASK_BOVIN	43	50
IAKYIPIQY	0	0	0	0	0	0	sp|P02668|CASK_BOVIN	43	51
IEELSLVASPT	0	0	0	0	0	0	tr|F1MFK1|F1MFK1_BOVIN	293	303
IEKFQSEEQ	0	0	0	0	0	0	sp|P02666|CASB_BOVIN	45	53
IEKFQSEEQQ	0	0	0	0	0	0	sp|P02666|CASB_BOVIN	45	54
IEKFQSEEQQQ	0	0	0	0	0	0	sp|P02666|CASB_BOVIN	45	55
IEKFQSEEQQQ	0	1	0	0	0	0	sp|P02666|CASB_BOVIN	45	55
IEKFQSEEQQQT	0	1	0	0	0	0	sp|P02666|CASB_BOVIN	45	56
IEKFQSEEQQQT	0	0	0	0	0	0	sp|P02666|CASB_BOVIN	45	56
IEKFQSEEQQQTE	0	1	0	0	0	0	sp|P02666|CASB_BOVIN	45	57
IEKFQSEEQQQTE	0	0	0	0	0	0	sp|P02666|CASB_BOVIN	45	57
IEKFQSEEQQQTED	0	1	0	0	0	0	sp|P02666|CASB_BOVIN	45	58
IEKFQSEEQQQTED	0	0	0	0	0	0	sp|P02666|CASB_BOVIN	45	58
IEKFQSEEQQQTEDEL	0	1	0	0	0	0	sp|P02666|CASB_BOVIN	45	60
IEKFQSEEQQQTEDELQ	0	1	0	0	0	0	sp|P02666|CASB_BOVIN	45	61
IEKFQSEEQQQTEDELQ	0	0	0	0	0	1	sp|P02666|CASB_BOVIN	45	61
IEKFQSEEQQQTEDELQD	0	1	0	0	0	0	sp|P02666|CASB_BOVIN	45	62
IEKFQSEEQQQTEDELQD	0	0	0	0	0	0	sp|P02666|CASB_BOVIN	45	62
IEKFQSEEQQQTEDELQDK	0	1	0	0	0	0	sp|P02666|CASB_BOVIN	45	63
IEKFQSEEQQQTEDELQDKIH	0	1	0	0	0	0	sp|P02666|CASB_BOVIN	45	65
IEKFQSEEQQQTEDELQDKIHP	0	0	0	0	0	0	sp|P02666|CASB_BOVIN	45	66
IEKFQSEEQQQTEDELQDKIHPF	0	1	0	0	0	0	sp|P02666|CASB_BOVIN	45	67
IEKFQSEEQQQTEDELQDKIHPF	0	0	0	0	0	0	sp|P02666|CASB_BOVIN	45	67
IEKFQSEEQQQTEDELQDKIHPF	0	0	0	0	0	1	sp|P02666|CASB_BOVIN	45	67
IEKFQSEEQQQTEDELQDKIHPFA	0	1	0	0	0	0	sp|P02666|CASB_BOVIN	45	68
IEKFQSEEQQQTEDELQDKIHPFAQ	0	1	0	0	0	0	sp|P02666|CASB_BOVIN	45	69
IEKFQSEEQQQTEDELQDKIHPFAQT	0	1	0	0	0	0	sp|P02666|CASB_BOVIN	45	70
IEKFQSEEQQQTEDELQDKIHPFAQTQ	0	0	0	0	0	0	sp|P02666|CASB_BOVIN	45	71
IEKFQSEEQQQTEDELQDKIHPFAQTQ	0	1	0	0	0	0	sp|P02666|CASB_BOVIN	45	71
IEKFQSEEQQQTEDELQDKIHPFAQTQ	0	0	0	0	0	1	sp|P02666|CASB_BOVIN	45	71
IEKFQSEEQQQTEDELQDKIHPFAQTQS	0	1	0	0	0	0	sp|P02666|CASB_BOVIN	45	72
IEKFQSEEQQQTEDELQDKIHPFAQTQSL	0	1	0	0	0	0	sp|P02666|CASB_BOVIN	45	73
IGSENSEKTTMP	0	0	0	0	0	0	sp|P02662|CASA1_BOVIN	201	212
IGSESTEDQAMEDIK	0	0	1	0	0	0	sp|P02662|CASA1_BOVIN	59	73
IHPFAQTQ	0	0	0	0	0	0	sp|P02666|CASB_BOVIN	64	71
IHPFAQTQSL	0	0	0	0	0	0	sp|P02666|CASB_BOVIN	64	73
IHPFAQTQSLVYPFPGPIPN	0	2	0	0	0	0	sp|P02666|CASB_BOVIN	64	83
IHPFAQTQSLVYPFPGPIPNSLPQ	0	0	0	0	0	0	sp|P02666|CASB_BOVIN	64	87
IHPFAQTQSLVYPFPGPIPNSLPQNIPPL	0	0	0	0	0	0	sp|P02666|CASB_BOVIN	64	92
IHPFAQTQSLVYPFPGPIPNSLPQNIPPL	0	0	0	0	0	1	sp|P02666|CASB_BOVIN	64	92
IHPFAQTQSLVYPFPGPIPNSLPQNIPPLTQTPV	0	0	0	0	0	0	sp|P02666|CASB_BOVIN	64	97
IISQETYKQEK	0	1	0	0	0	0	sp|P02663|CASA2_BOVIN	29	39
IKHQGLPQEVLNENLL	0	0	0	0	0	0	sp|P02662|CASA1_BOVIN	21	36
ILNKPEDETH	0	0	0	0	0	0	sp|P80195|GLCM1_BOVIN	19	28
ILNKPEDETHL	0	0	0	0	0	0	sp|P80195|GLCM1_BOVIN	19	29
ILNKPEDETHLE	0	0	0	0	0	0	sp|P80195|GLCM1_BOVIN	19	30
INKKIEKFQSEE	0	1	0	0	0	0	sp|P02666|CASB_BOVIN	41	52
INKKIEKFQSEEQQ	0	1	0	0	0	0	sp|P02666|CASB_BOVIN	41	54
INKKIEKFQSEEQQQ	0	1	0	0	0	0	sp|P02666|CASB_BOVIN	41	55
INKKIEKFQSEEQQQT	0	1	0	0	0	0	sp|P02666|CASB_BOVIN	41	56
INKKIEKFQSEEQQQTED	0	1	0	0	0	0	sp|P02666|CASB_BOVIN	41	58
INKKIEKFQSEEQQQTEDEL	0	1	0	0	0	0	sp|P02666|CASB_BOVIN	41	60
INKKIEKFQSEEQQQTEDELQ	0	1	0	0	0	0	sp|P02666|CASB_BOVIN	41	61
INKKIEKFQSEEQQQTEDELQDK	0	1	0	0	0	0	sp|P02666|CASB_BOVIN	41	63
INKKIEKFQSEEQQQTEDELQDKIHPF	0	1	0	0	0	0	sp|P02666|CASB_BOVIN	41	67
INKKIEKFQSEEQQQTEDELQDKIHPF	0	0	0	0	0	1	sp|P02666|CASB_BOVIN	41	67
INKKIEKFQSEEQQQTEDELQDKIHPFAQTQ	0	1	0	0	0	0	sp|P02666|CASB_BOVIN	41	71
INNILNEVEVGDIIIESLDIITITVPPA	0	0	0	0	0	0	tr|E1BG26|E1BG26_BOVIN	430	457
INNQFLPYPYYAKPA	0	0	0	0	0	0	sp|P02668|CASK_BOVIN	72	86
IPNPIGSE	0	0	0	0	0	0	sp|P02662|CASA1_BOVIN	197	204
IPNPIGSEN	0	0	0	0	0	0	sp|P02662|CASA1_BOVIN	197	205
IPNPIGSEN	0	0	0	0	0	1	sp|P02662|CASA1_BOVIN	197	205
IPNPIGSENS	0	0	0	0	0	0	sp|P02662|CASA1_BOVIN	197	206
IPNPIGSENS	0	0	0	0	0	1	sp|P02662|CASA1_BOVIN	197	206
IPNPIGSENSE	0	0	0	0	0	0	sp|P02662|CASA1_BOVIN	197	207
IPNPIGSENSE	0	0	0	0	0	1	sp|P02662|CASA1_BOVIN	197	207
IPNPIGSENSEK	0	0	0	0	0	0	sp|P02662|CASA1_BOVIN	197	208
IPNPIGSENSEK	0	0	0	0	0	1	sp|P02662|CASA1_BOVIN	197	208
IPNPIGSENSEKT	0	0	0	0	0	0	sp|P02662|CASA1_BOVIN	197	209
IPNPIGSENSEKT	0	0	0	0	0	1	sp|P02662|CASA1_BOVIN	197	209
IPNPIGSENSEKTTMP	0	0	0	0	0	1	sp|P02662|CASA1_BOVIN	197	212
IPNPIGSENSEKTTMP	0	0	1	0	0	0	sp|P02662|CASA1_BOVIN	197	212
IPNPIGSENSEKTTMP	0	0	0	0	0	0	sp|P02662|CASA1_BOVIN	197	212
IPNPIGSENSEKTTMPL	0	0	0	0	0	1	sp|P02662|CASA1_BOVIN	197	213
IPNPIGSENSEKTTMPLW	0	0	0	0	0	0	sp|P02662|CASA1_BOVIN	197	214
IPNPIGSENSEKTTMPLW	0	0	0	0	0	1	sp|P02662|CASA1_BOVIN	197	214
IPPLTQTPVVVPP	0	0	0	0	0	0	sp|P02666|CASB_BOVIN	89	101
IPPLTQTPVVVPPF	0	0	0	0	0	0	sp|P02666|CASB_BOVIN	89	102
IPPLTQTPVVVPPFLQP	0	0	0	0	0	0	sp|P02666|CASB_BOVIN	89	105
IPPLTQTPVVVPPFLQPE	0	0	0	0	0	0	sp|P02666|CASB_BOVIN	89	106
IPPLTQTPVVVPPFLQPEVM	0	0	1	0	0	0	sp|P02666|CASB_BOVIN	89	108
IPPLTQTPVVVPPFLQPEVMG	0	0	0	0	0	0	sp|P02666|CASB_BOVIN	89	109
IQKEDVPSE	0	0	0	0	0	0	sp|P02662|CASA1_BOVIN	96	104
IQKEDVPSER	0	0	0	0	0	0	sp|P02662|CASA1_BOVIN	96	105
IQKEDVPSER	0	0	0	0	0	1	sp|P02662|CASA1_BOVIN	96	105
IQKEDVPSERY	0	0	0	0	0	0	sp|P02662|CASA1_BOVIN	96	106
IQKEDVPSERYL	0	0	0	0	0	0	sp|P02662|CASA1_BOVIN	96	107
IQKEDVPSERYLG	0	0	0	0	0	0	sp|P02662|CASA1_BOVIN	96	108
IQKEDVPSERYLGYL	0	0	0	0	0	0	sp|P02662|CASA1_BOVIN	96	110
IQKEDVPSERYLGYLEQL	0	0	0	0	0	0	sp|P02662|CASA1_BOVIN	96	113
IQKEDVPSERYLGYLEQLLRL	0	0	0	0	0	0	sp|P02662|CASA1_BOVIN	96	116
IQKEDVPSERYLGYLEQLLRLK	0	0	0	0	0	0	sp|P02662|CASA1_BOVIN	96	117
IQPKTKVIPYVR	0	0	0	0	0	0	sp|P02663|CASA2_BOVIN	209	220
IQPKTKVIPYVR	0	0	0	0	0	1	sp|P02663|CASA2_BOVIN	209	220
ISKEQIVIR	0	1	0	0	0	0	sp|P80195|GLCM1_BOVIN	63	71
ISQETYK	0	1	0	0	0	0	sp|P02663|CASA2_BOVIN	30	36
ISQRYQKF	0	0	0	0	0	0	sp|P02663|CASA2_BOVIN	182	189
ITVDDKHY	0	0	0	0	0	0	sp|P02663|CASA2_BOVIN	86	93
ITVDDKHYQ	0	0	0	0	0	0	sp|P02663|CASA2_BOVIN	86	94
ITVDDKHYQK	0	0	0	0	0	0	sp|P02663|CASA2_BOVIN	86	95
ITVDDKHYQKA	0	0	0	0	0	0	sp|P02663|CASA2_BOVIN	86	96
ITVDDKHYQKAL	0	0	0	0	0	0	sp|P02663|CASA2_BOVIN	86	97
ITVDDKHYQKALNE	0	0	0	0	0	0	sp|P02663|CASA2_BOVIN	86	99
ITVDDKHYQKALNEIN	0	0	0	0	0	0	sp|P02663|CASA2_BOVIN	86	101
ITVDDKHYQKALNEINQ	0	0	0	0	0	0	sp|P02663|CASA2_BOVIN	86	102
ITVDDKHYQKALNEINQF	0	0	0	0	0	0	sp|P02663|CASA2_BOVIN	86	103
ITVDDKHYQKALNEINQFY	0	0	0	0	0	0	sp|P02663|CASA2_BOVIN	86	104
ITVDDKHYQKALNEINQFY	0	0	0	0	0	1	sp|P02663|CASA2_BOVIN	86	104
ITVDDKHYQKALNEINQFYQ	0	0	0	0	0	0	sp|P02663|CASA2_BOVIN	86	105
ITVDDKHYQKALNEINQFYQKFPQ	0	0	0	0	0	1	sp|P02663|CASA2_BOVIN	86	109
ITVDDKHYQKALNEINQFYQKFPQY	0	0	0	0	0	0	sp|P02663|CASA2_BOVIN	86	110
ITVDDKHYQKALNEINQFYQKFPQY	0	0	0	0	0	1	sp|P02663|CASA2_BOVIN	86	110
ITVDDKHYQKALNEINQFYQKFPQYLQ	0	0	0	0	0	1	sp|P02663|CASA2_BOVIN	86	112
ITVDDKHYQKALNEINQFYQKFPQYLQY	0	0	0	0	0	1	sp|P02663|CASA2_BOVIN	86	113
ITVDDKHYQKALNEINQFYQKFPQYLQY	0	0	0	0	0	0	sp|P02663|CASA2_BOVIN	86	113
IVLNPWDQ	0	0	0	0	0	0	sp|P02663|CASA2_BOVIN	119	126
IVLNPWDQV	0	0	0	0	0	0	sp|P02663|CASA2_BOVIN	119	127
IVLNPWDQVK	0	0	0	0	0	0	sp|P02663|CASA2_BOVIN	119	128
IVLNPWDQVKR	0	0	0	0	0	0	sp|P02663|CASA2_BOVIN	119	129
IVLNPWDQVKRN	0	0	0	0	0	0	sp|P02663|CASA2_BOVIN	119	130
IVPNSAEER	0	0	0	0	0	0	sp|P02662|CASA1_BOVIN	126	134
IVPNSAEER	0	1	0	0	0	0	sp|P02662|CASA1_BOVIN	126	134
IVPNSAEERL	0	0	0	0	0	0	sp|P02662|CASA1_BOVIN	126	135
IVPNSAEERL	0	1	0	0	0	0	sp|P02662|CASA1_BOVIN	126	135
IVPNSAEERLH	0	0	0	0	0	0	sp|P02662|CASA1_BOVIN	126	136
IVPNSAEERLH	0	1	0	0	0	0	sp|P02662|CASA1_BOVIN	126	136
IVPNSAEERLH	0	0	0	0	0	1	sp|P02662|CASA1_BOVIN	126	136
IVPNSAEERLHSM	0	1	0	0	0	0	sp|P02662|CASA1_BOVIN	126	138
IVPNSAEERLHSMK	0	1	0	0	0	0	sp|P02662|CASA1_BOVIN	126	139
IVPNSAEERLHSMKEGIH	0	1	0	0	0	0	sp|P02662|CASA1_BOVIN	126	143
IVPNSAEERLHSMKEGIHAQ	0	1	0	0	0	0	sp|P02662|CASA1_BOVIN	126	145
KAMKPWIQPK	0	0	1	0	0	0	sp|P02663|CASA2_BOVIN	203	212
KAMKPWIQPK	0	0	0	0	0	0	sp|P02663|CASA2_BOVIN	203	212
KAMKPWIQPKTKVIPY	0	0	0	0	0	0	sp|P02663|CASA2_BOVIN	203	218
KAVPYPQR	0	0	0	0	0	0	sp|P02666|CASB_BOVIN	191	198
KAVPYPQRD	0	0	0	0	0	0	sp|P02666|CASB_BOVIN	191	199
KAVPYPQRDMP	0	0	0	0	0	0	sp|P02666|CASB_BOVIN	191	201
KAVPYPQRDMP	0	0	1	0	0	0	sp|P02666|CASB_BOVIN	191	201
KAVPYPQRDMPI	0	0	0	0	0	0	sp|P02666|CASB_BOVIN	191	202
KAVPYPQRDMPI	0	0	1	0	0	0	sp|P02666|CASB_BOVIN	191	202
KAVPYPQRDMPIQ	0	0	1	0	0	0	sp|P02666|CASB_BOVIN	191	203
KAVPYPQRDMPIQ	0	0	0	0	0	0	sp|P02666|CASB_BOVIN	191	203
KAVPYPQRDMPIQA	0	0	1	0	0	0	sp|P02666|CASB_BOVIN	191	204
KAVPYPQRDMPIQA	0	0	0	0	0	0	sp|P02666|CASB_BOVIN	191	204
KAVPYPQRDMPIQA	0	0	0	0	0	1	sp|P02666|CASB_BOVIN	191	204
KAVPYPQRDMPIQAF	0	0	0	0	0	0	sp|P02666|CASB_BOVIN	191	205
KAVPYPQRDMPIQAFL	0	0	0	0	0	0	sp|P02666|CASB_BOVIN	191	206
KAVPYPQRDMPIQAFLL	0	0	1	0	0	0	sp|P02666|CASB_BOVIN	191	207
KAVPYPQRDMPIQAFLL	0	0	0	0	0	0	sp|P02666|CASB_BOVIN	191	207
KAVPYPQRDMPIQAFLL	0	0	0	0	0	1	sp|P02666|CASB_BOVIN	191	207
KAVPYPQRDMPIQAFLLY	0	0	0	0	0	0	sp|P02666|CASB_BOVIN	191	208
KAVPYPQRDMPIQAFLLYQEPVL	0	0	0	0	0	1	sp|P02666|CASB_BOVIN	191	213
KAVPYPQRDMPIQAFLLYQEPVL	0	0	0	0	0	0	sp|P02666|CASB_BOVIN	191	213
KAVPYPQRDMPIQAFLLYQEPVLGPV	0	0	0	0	0	1	sp|P02666|CASB_BOVIN	191	216
KAVPYPQRDMPIQAFLLYQEPVLGPV	0	0	0	0	0	0	sp|P02666|CASB_BOVIN	191	216
KAVPYPQRDMPIQAFLLYQEPVLGPVRGP	0	0	0	0	0	1	sp|P02666|CASB_BOVIN	191	219
KAVPYPQRDMPIQAFLLYQEPVLGPVRGPFP	0	0	0	0	0	1	sp|P02666|CASB_BOVIN	191	221
KAVPYPQRDMPIQAFLLYQEPVLGPVRGPFPII	0	0	0	0	0	0	sp|P02666|CASB_BOVIN	191	223
KAVPYPQRDMPIQAFLLYQEPVLGPVRGPFPII	0	0	0	0	0	1	sp|P02666|CASB_BOVIN	191	223
KAVPYPQRDMPIQAFLLYQEPVLGPVRGPFPIIV	0	0	0	0	0	1	sp|P02666|CASB_BOVIN	191	224
KAVPYPQRDMPIQAFLLYQEPVLGPVRGPFPIIV	0	0	0	0	0	0	sp|P02666|CASB_BOVIN	191	224
KDERFFSD	0	0	0	0	0	0	sp|P02668|CASK_BOVIN	34	41
KDERFFSDKIA	0	0	0	0	0	0	sp|P02668|CASK_BOVIN	34	44
KDIGSESTEDQA	0	0	0	0	0	0	sp|P02662|CASA1_BOVIN	57	68
KDIGSESTEDQAM	0	1	0	0	0	0	sp|P02662|CASA1_BOVIN	57	69
KDIGSESTEDQAM	0	0	0	0	0	0	sp|P02662|CASA1_BOVIN	57	69
KDIGSESTEDQAME	0	2	0	0	0	0	sp|P02662|CASA1_BOVIN	57	70
KDIGSESTEDQAME	0	0	1	0	0	0	sp|P02662|CASA1_BOVIN	57	70
KDIGSESTEDQAME	0	0	0	0	0	0	sp|P02662|CASA1_BOVIN	57	70
KDIGSESTEDQAMED	0	0	1	0	0	0	sp|P02662|CASA1_BOVIN	57	71
KDIGSESTEDQAMEDIK	0	2	0	0	0	0	sp|P02662|CASA1_BOVIN	57	73
KDIGSESTEDQAMEDIK	0	0	1	0	0	0	sp|P02662|CASA1_BOVIN	57	73
KDIGSESTEDQAMEDIK	0	0	0	0	0	0	sp|P02662|CASA1_BOVIN	57	73
KDIGSESTEDQAMEDIKQM	0	2	0	0	0	0	sp|P02662|CASA1_BOVIN	57	75
KDPTQAFVPRTVMIGGKAA	0	0	1	0	0	0	sp|Q3B7M9|PYGB_BOVIN	593	611
KDVLARAAAKGLLEGIEL	0	0	0	0	0	0	tr|F1MME5|F1MME5_BOVIN	522	539
KDVLARAAAKGLLEGIELG	0	0	0	0	0	0	tr|F1MME5|F1MME5_BOVIN	522	540
KDVLARAAAKGLLEGIELGK	0	0	0	0	0	0	tr|F1MME5|F1MME5_BOVIN	522	541
KEAAEAKAQEAAK	0	0	0	0	0	1	tr|E1BF55|E1BF55_BOVIN	405	417
KEAAEAKAQEAAKQ	0	0	0	0	0	1	tr|E1BF55|E1BF55_BOVIN	405	418
KEAAEAKAQEAAKQMRL	0	0	0	0	0	1	tr|E1BF55|E1BF55_BOVIN	405	421
KEAAEAKAQEAAKQMRLK	0	0	0	0	0	1	tr|E1BF55|E1BF55_BOVIN	405	422
KEAEAKAALEEEKR	0	0	0	0	0	0	tr|F1MPV5|F1MPV5_BOVIN	843	856
KEAMAPKHKEMPFPKYPVEPF	0	0	0	0	0	0	sp|P02666|CASB_BOVIN	114	134
KEDVPSER	0	0	0	0	0	0	sp|P02662|CASA1_BOVIN	98	105
KEDVPSERY	0	0	0	0	0	0	sp|P02662|CASA1_BOVIN	98	106
KEDVPSERYL	0	0	0	0	0	0	sp|P02662|CASA1_BOVIN	98	107
KEDVPSERYLG	0	0	0	0	0	0	sp|P02662|CASA1_BOVIN	98	108
KEDVPSERYLGY	0	0	0	0	0	0	sp|P02662|CASA1_BOVIN	98	109
KEDVPSERYLGYL	0	0	0	0	0	0	sp|P02662|CASA1_BOVIN	98	110
KEDVPSERYLGYLEQ	0	0	0	0	0	0	sp|P02662|CASA1_BOVIN	98	112
KEDVPSERYLGYLEQLLRL	0	0	0	0	0	0	sp|P02662|CASA1_BOVIN	98	116
KEDVPSERYLGYLEQLLRLK	0	0	0	0	0	0	sp|P02662|CASA1_BOVIN	98	117
KEDVPSERYLGYLEQLLRLKK	0	0	0	0	0	0	sp|P02662|CASA1_BOVIN	98	118
KEGIHAQQKEPMIGV	0	0	0	0	0	0	sp|P02662|CASA1_BOVIN	139	153
KEGIHAQQKEPMIGVN	0	0	1	0	0	0	sp|P02662|CASA1_BOVIN	139	154
KEGIHAQQKEPMIGVN	0	0	0	0	0	0	sp|P02662|CASA1_BOVIN	139	154
KEGIHAQQKEPMIGVNQ	0	0	0	0	0	0	sp|P02662|CASA1_BOVIN	139	155
KEGIHAQQKEPMIGVNQEL	0	0	0	0	0	0	sp|P02662|CASA1_BOVIN	139	157
KEGIHAQQKEPMIGVNQELA	0	0	1	0	0	0	sp|P02662|CASA1_BOVIN	139	158
KEGIHAQQKEPMIGVNQELA	0	0	0	0	0	0	sp|P02662|CASA1_BOVIN	139	158
KEGIHAQQKEPMIGVNQELAY	0	0	1	0	0	0	sp|P02662|CASA1_BOVIN	139	159
KEGIHAQQKEPMIGVNQELAY	0	0	0	0	0	0	sp|P02662|CASA1_BOVIN	139	159
KEGIHAQQKEPMIGVNQELAYFYPE	0	0	0	0	0	0	sp|P02662|CASA1_BOVIN	139	163
KEGIHAQQKEPMIGVNQELAYFYPELFR	0	0	0	0	0	1	sp|P02662|CASA1_BOVIN	139	166
KEGIHAQQKEPMIGVNQELAYFYPELFR	0	0	0	0	0	0	sp|P02662|CASA1_BOVIN	139	166
KEGIHAQQKEPMIGVNQELAYFYPELFRQ	0	0	1	0	0	0	sp|P02662|CASA1_BOVIN	139	167
KEGIHAQQKEPMIGVNQELAYFYPELFRQ	0	0	0	0	0	1	sp|P02662|CASA1_BOVIN	139	167
KEGIHAQQKEPMIGVNQELAYFYPELFRQ	0	0	0	0	0	0	sp|P02662|CASA1_BOVIN	139	167
KEGIHAQQKEPMIGVNQELAYFYPELFRQF	0	0	0	0	0	1	sp|P02662|CASA1_BOVIN	139	168
KEGIHAQQKEPMIGVNQELAYFYPELFRQFYQL	0	0	0	0	0	1	sp|P02662|CASA1_BOVIN	139	171
KEGIHAQQKEPMIGVNQELAYFYPELFRQFYQL	0	0	0	0	0	0	sp|P02662|CASA1_BOVIN	139	171
KEGIHAQQKEPMIGVNQELAYFYPELFRQFYQLD	0	0	0	0	0	1	sp|P02662|CASA1_BOVIN	139	172
KEGIHAQQKEPMIGVNQELAYFYPELFRQFYQLDAYPS	0	0	0	0	0	1	sp|P02662|CASA1_BOVIN	139	176
KEGIHAQQKEPMIGVNQELAYFYPELFRQFYQLDAYPS	0	0	0	0	0	2	sp|P02662|CASA1_BOVIN	139	176
KEGNGIGVN	0	0	0	0	0	0	tr|F1MY82|F1MY82_BOVIN	337	345
KEKVNELSKDIGSESTEDQAMEDIK	0	3	0	0	0	0	sp|P02662|CASA1_BOVIN	49	73
KEKVNELSKDIGSESTEDQAMEDIK	0	2	0	0	0	0	sp|P02662|CASA1_BOVIN	49	73
KEMPFPK	0	0	0	0	0	0	sp|P02666|CASB_BOVIN	122	128
KEMPFPKYP	0	0	0	0	0	0	sp|P02666|CASB_BOVIN	122	130
KEMPFPKYPVEP	0	0	0	0	0	0	sp|P02666|CASB_BOVIN	122	133
KEMPFPKYPVEP	0	0	1	0	0	0	sp|P02666|CASB_BOVIN	122	133
KEMPFPKYPVEPF	0	0	1	0	0	0	sp|P02666|CASB_BOVIN	122	134
KEMPFPKYPVEPF	0	0	0	0	0	0	sp|P02666|CASB_BOVIN	122	134
KEMPFPKYPVEPFT	0	0	0	0	0	0	sp|P02666|CASB_BOVIN	122	135
KEMPFPKYPVEPFTES	0	0	0	0	0	0	sp|P02666|CASB_BOVIN	122	137
KEMPFPKYPVEPFTESQ	0	0	0	0	0	0	sp|P02666|CASB_BOVIN	122	138
KEMPFPKYPVEPFTESQSLTLTDVENL	0	0	0	0	0	2	sp|P02666|CASB_BOVIN	122	148
KEMPFPKYPVEPFTESQSLTLTDVENLHL	0	0	1	0	0	0	sp|P02666|CASB_BOVIN	122	150
KEMPFPKYPVEPFTESQSLTLTDVENLHL	0	0	0	0	0	1	sp|P02666|CASB_BOVIN	122	150
KEMPFPKYPVEPFTESQSLTLTDVENLHL	0	0	0	0	0	0	sp|P02666|CASB_BOVIN	122	150
KEMPFPKYPVEPFTESQSLTLTDVENLHLP	0	0	1	0	0	0	sp|P02666|CASB_BOVIN	122	151
KEMPFPKYPVEPFTESQSLTLTDVENLHLP	0	0	0	0	0	1	sp|P02666|CASB_BOVIN	122	151
KEMPFPKYPVEPFTESQSLTLTDVENLHLP	0	0	0	0	0	0	sp|P02666|CASB_BOVIN	122	151
KEMPFPKYPVEPFTESQSLTLTDVENLHLPL	0	0	1	0	0	0	sp|P02666|CASB_BOVIN	122	152
KEMPFPKYPVEPFTESQSLTLTDVENLHLPL	0	0	0	0	0	0	sp|P02666|CASB_BOVIN	122	152
KEMPFPKYPVEPFTESQSLTLTDVENLHLPL	0	0	0	0	0	1	sp|P02666|CASB_BOVIN	122	152
KEMPFPKYPVEPFTESQSLTLTDVENLHLPLP	0	0	0	0	0	0	sp|P02666|CASB_BOVIN	122	153
KEMPFPKYPVEPFTESQSLTLTDVENLHLPLP	0	0	0	0	0	2	sp|P02666|CASB_BOVIN	122	153
KEMPFPKYPVEPFTESQSLTLTDVENLHLPLP	0	0	0	0	0	1	sp|P02666|CASB_BOVIN	122	153
KEMPFPKYPVEPFTESQSLTLTDVENLHLPLP	0	0	1	0	0	0	sp|P02666|CASB_BOVIN	122	153
KEMPFPKYPVEPFTESQSLTLTDVENLHLPLPL	0	0	0	0	0	0	sp|P02666|CASB_BOVIN	122	154
KEMPFPKYPVEPFTESQSLTLTDVENLHLPLPL	0	0	0	0	0	1	sp|P02666|CASB_BOVIN	122	154
KEMPFPKYPVEPFTESQSLTLTDVENLHLPLPLL	0	3	0	0	0	0	sp|P02666|CASB_BOVIN	122	155
KEMPFPKYPVEPFTESQSLTLTDVENLHLPLPLLQS	0	0	0	0	0	1	sp|P02666|CASB_BOVIN	122	157
KEMPFPKYPVEPFTESQSLTLTDVENLHLPLPLLQS	0	0	0	0	0	0	sp|P02666|CASB_BOVIN	122	157
KEMPFPKYPVEPFTESQSLTLTDVENLHLPLPLLQS	0	0	1	0	0	0	sp|P02666|CASB_BOVIN	122	157
KEPMIGV	0	0	0	0	0	0	sp|P02662|CASA1_BOVIN	147	153
KEPMIGVN	0	0	0	0	0	0	sp|P02662|CASA1_BOVIN	147	154
KEPMIGVN	0	0	1	0	0	0	sp|P02662|CASA1_BOVIN	147	154
KEPMIGVN	0	0	0	0	0	1	sp|P02662|CASA1_BOVIN	147	154
KEPMIGVNQ	0	0	0	0	0	0	sp|P02662|CASA1_BOVIN	147	155
KEPMIGVNQ	0	0	1	0	0	0	sp|P02662|CASA1_BOVIN	147	155
KEPMIGVNQE	0	0	1	0	0	0	sp|P02662|CASA1_BOVIN	147	156
KEPMIGVNQE	0	0	0	0	0	0	sp|P02662|CASA1_BOVIN	147	156
KEPMIGVNQEL	0	0	0	0	0	0	sp|P02662|CASA1_BOVIN	147	157
KEPMIGVNQEL	0	0	1	0	0	0	sp|P02662|CASA1_BOVIN	147	157
KEPMIGVNQEL	0	0	0	0	0	1	sp|P02662|CASA1_BOVIN	147	157
KEPMIGVNQELA	0	0	0	0	0	0	sp|P02662|CASA1_BOVIN	147	158
KEPMIGVNQELA	0	0	1	0	0	0	sp|P02662|CASA1_BOVIN	147	158
KEPMIGVNQELA	0	0	0	0	0	1	sp|P02662|CASA1_BOVIN	147	158
KEPMIGVNQELAY	0	0	0	0	0	0	sp|P02662|CASA1_BOVIN	147	159
KEPMIGVNQELAYFYPELFRQ	0	0	0	0	0	0	sp|P02662|CASA1_BOVIN	147	167
KFALPQYL	0	0	0	0	0	0	sp|P02663|CASA2_BOVIN	188	195
KFALPQYLKT	0	0	0	0	0	0	sp|P02663|CASA2_BOVIN	188	197
KFALPQYLKTVYQHQ	0	0	0	0	0	0	sp|P02663|CASA2_BOVIN	188	202
KFLDDDLTDDIM	0	0	1	0	0	0	sp|P00711|LALBA_BOVIN	98	109
KFPQYLQYLYQGPIVLNPWDQVKR	0	0	0	0	0	0	sp|P02663|CASA2_BOVIN	106	129
KFPQYLQYLYQGPIVLNPWDQVKRN	0	0	0	0	0	1	sp|P02663|CASA2_BOVIN	106	130
KFQSEEQQQTE	0	1	0	0	0	0	sp|P02666|CASB_BOVIN	47	57
KFQSEEQQQTED	0	1	0	0	0	0	sp|P02666|CASB_BOVIN	47	58
KFQSEEQQQTEDEL	0	1	0	0	0	0	sp|P02666|CASB_BOVIN	47	60
KFQSEEQQQTEDELQ	0	0	0	0	0	0	sp|P02666|CASB_BOVIN	47	61
KFQSEEQQQTEDELQ	0	1	0	0	0	0	sp|P02666|CASB_BOVIN	47	61
KFQSEEQQQTEDELQD	0	1	0	0	0	0	sp|P02666|CASB_BOVIN	47	62
KFQSEEQQQTEDELQDK	0	1	0	0	0	0	sp|P02666|CASB_BOVIN	47	63
KFQSEEQQQTEDELQDKIHP	0	1	0	0	0	0	sp|P02666|CASB_BOVIN	47	66
KFQSEEQQQTEDELQDKIHPF	0	1	0	0	0	0	sp|P02666|CASB_BOVIN	47	67
KFQSEEQQQTEDELQDKIHPF	0	0	0	0	0	0	sp|P02666|CASB_BOVIN	47	67
KFQSEEQQQTEDELQDKIHPFA	0	1	0	0	0	0	sp|P02666|CASB_BOVIN	47	68
KFQSEEQQQTEDELQDKIHPFAQ	0	1	0	0	0	0	sp|P02666|CASB_BOVIN	47	69
KFQSEEQQQTEDELQDKIHPFAQT	0	1	0	0	0	0	sp|P02666|CASB_BOVIN	47	70
KFQSEEQQQTEDELQDKIHPFAQTQ	0	1	0	0	0	0	sp|P02666|CASB_BOVIN	47	71
KFQSEEQQQTEDELQDKIHPFAQTQ	0	0	0	0	0	0	sp|P02666|CASB_BOVIN	47	71
KFQSEEQQQTEDELQDKIHPFAQTQS	0	1	0	0	0	0	sp|P02666|CASB_BOVIN	47	72
KFQSEEQQQTEDELQDKIHPFAQTQSL	0	1	0	0	0	0	sp|P02666|CASB_BOVIN	47	73
KFVEVLDERS	0	0	0	0	0	0	sp|Q2KI13|SGSM3_BOVIN	529	538
KGLDIQKVA	0	0	0	0	0	0	sp|P02754|LACB_BOVIN	24	32
KHIQKEDVPSER	0	0	0	0	0	0	sp|P02662|CASA1_BOVIN	94	105
KHIQKEDVPSERY	0	0	0	0	0	0	sp|P02662|CASA1_BOVIN	94	106
KHIQKEDVPSERYL	0	0	0	0	0	0	sp|P02662|CASA1_BOVIN	94	107
KHIQKEDVPSERYLG	0	0	0	0	0	0	sp|P02662|CASA1_BOVIN	94	108
KHKEMPFPKYPVEPF	0	0	0	0	0	0	sp|P02666|CASB_BOVIN	120	134
KHKEMPFPKYPVEPF	0	0	1	0	0	0	sp|P02666|CASB_BOVIN	120	134
KHKEMPFPKYPVEPFTESQ	0	0	0	0	0	0	sp|P02666|CASB_BOVIN	120	138
KHPIKHQGLPQEVLN	0	0	0	0	0	0	sp|P02662|CASA1_BOVIN	18	32
KHPIKHQGLPQEVLNENLL	0	0	0	0	0	1	sp|P02662|CASA1_BOVIN	18	36
KHPIKHQGLPQEVLNENLLR	0	0	0	0	0	0	sp|P02662|CASA1_BOVIN	18	37
KHPIKHQGLPQEVLNENLLRF	0	0	0	0	0	1	sp|P02662|CASA1_BOVIN	18	38
KHPKPVPVSNAEGSQPDDSSS	0	0	0	0	0	1	sp|Q9TUM6|PLIN2_BOVIN	430	450
KHQGLPQEVLNENLL	0	0	0	0	0	0	sp|P02662|CASA1_BOVIN	22	36
KIAKYIPIQ	0	0	0	0	0	0	sp|P02668|CASK_BOVIN	42	50
KIEKFQSEE	0	0	0	0	0	0	sp|P02666|CASB_BOVIN	44	52
KIEKFQSEE	0	1	0	0	0	0	sp|P02666|CASB_BOVIN	44	52
KIEKFQSEEQ	0	0	0	0	0	0	sp|P02666|CASB_BOVIN	44	53
KIEKFQSEEQQ	0	0	0	0	0	0	sp|P02666|CASB_BOVIN	44	54
KIEKFQSEEQQ	0	1	0	0	0	0	sp|P02666|CASB_BOVIN	44	54
KIEKFQSEEQQQ	0	0	0	0	0	0	sp|P02666|CASB_BOVIN	44	55
KIEKFQSEEQQQ	0	1	0	0	0	0	sp|P02666|CASB_BOVIN	44	55
KIEKFQSEEQQQT	0	0	0	0	0	0	sp|P02666|CASB_BOVIN	44	56
KIEKFQSEEQQQT	0	1	0	0	0	0	sp|P02666|CASB_BOVIN	44	56
KIEKFQSEEQQQTE	0	1	0	0	0	0	sp|P02666|CASB_BOVIN	44	57
KIEKFQSEEQQQTE	0	0	0	0	0	0	sp|P02666|CASB_BOVIN	44	57
KIEKFQSEEQQQTED	0	1	0	0	0	0	sp|P02666|CASB_BOVIN	44	58
KIEKFQSEEQQQTED	0	0	0	0	0	0	sp|P02666|CASB_BOVIN	44	58
KIEKFQSEEQQQTEDE	0	1	0	0	0	0	sp|P02666|CASB_BOVIN	44	59
KIEKFQSEEQQQTEDEL	0	0	0	0	0	0	sp|P02666|CASB_BOVIN	44	60
KIEKFQSEEQQQTEDEL	0	1	0	0	0	0	sp|P02666|CASB_BOVIN	44	60
KIEKFQSEEQQQTEDELQ	0	1	0	0	0	0	sp|P02666|CASB_BOVIN	44	61
KIEKFQSEEQQQTEDELQ	0	0	0	0	0	0	sp|P02666|CASB_BOVIN	44	61
KIEKFQSEEQQQTEDELQD	0	0	0	0	0	0	sp|P02666|CASB_BOVIN	44	62
KIEKFQSEEQQQTEDELQD	0	1	0	0	0	0	sp|P02666|CASB_BOVIN	44	62
KIEKFQSEEQQQTEDELQDK	0	1	0	0	0	0	sp|P02666|CASB_BOVIN	44	63
KIEKFQSEEQQQTEDELQDK	0	2	0	0	0	0	sp|P02666|CASB_BOVIN	44	63
KIEKFQSEEQQQTEDELQDK	0	0	0	0	0	0	sp|P02666|CASB_BOVIN	44	63
KIEKFQSEEQQQTEDELQDKIH	0	1	0	0	0	0	sp|P02666|CASB_BOVIN	44	65
KIEKFQSEEQQQTEDELQDKIHP	0	1	0	0	0	0	sp|P02666|CASB_BOVIN	44	66
KIEKFQSEEQQQTEDELQDKIHPF	0	1	0	0	0	0	sp|P02666|CASB_BOVIN	44	67
KIEKFQSEEQQQTEDELQDKIHPF	0	0	0	0	0	0	sp|P02666|CASB_BOVIN	44	67
KIEKFQSEEQQQTEDELQDKIHPF	0	2	0	0	0	0	sp|P02666|CASB_BOVIN	44	67
KIEKFQSEEQQQTEDELQDKIHPFA	0	1	0	0	0	0	sp|P02666|CASB_BOVIN	44	68
KIEKFQSEEQQQTEDELQDKIHPFAQ	0	1	0	0	0	0	sp|P02666|CASB_BOVIN	44	69
KIEKFQSEEQQQTEDELQDKIHPFAQT	0	1	0	0	0	0	sp|P02666|CASB_BOVIN	44	70
KIEKFQSEEQQQTEDELQDKIHPFAQTQ	0	0	0	0	0	1	sp|P02666|CASB_BOVIN	44	71
KIEKFQSEEQQQTEDELQDKIHPFAQTQ	0	1	0	0	0	0	sp|P02666|CASB_BOVIN	44	71
KIEKFQSEEQQQTEDELQDKIHPFAQTQ	0	0	0	0	0	0	sp|P02666|CASB_BOVIN	44	71
KIEKFQSEEQQQTEDELQDKIHPFAQTQS	0	1	0	0	0	0	sp|P02666|CASB_BOVIN	44	72
KIEKFQSEEQQQTEDELQDKIHPFAQTQSL	0	1	0	0	0	0	sp|P02666|CASB_BOVIN	44	73
KIHPFAQTQ	0	0	0	0	0	0	sp|P02666|CASB_BOVIN	63	71
KIHPFAQTQS	0	0	0	0	0	0	sp|P02666|CASB_BOVIN	63	72
KITVDDKHYQKAL	0	0	0	0	0	0	sp|P02663|CASA2_BOVIN	85	97
KKAAAAAAAATLLPHE	0	0	0	0	0	0	tr|G3MYL5|G3MYL5_BOVIN	407	422
KKIEKFQSEE	0	1	0	0	0	0	sp|P02666|CASB_BOVIN	43	52
KKIEKFQSEEQ	0	1	0	0	0	0	sp|P02666|CASB_BOVIN	43	53
KKIEKFQSEEQQ	0	0	0	0	0	0	sp|P02666|CASB_BOVIN	43	54
KKIEKFQSEEQQQ	0	1	0	0	0	0	sp|P02666|CASB_BOVIN	43	55
KKIEKFQSEEQQQ	0	0	0	0	0	0	sp|P02666|CASB_BOVIN	43	55
KKIEKFQSEEQQQT	0	1	0	0	0	0	sp|P02666|CASB_BOVIN	43	56
KKIEKFQSEEQQQTE	0	1	0	0	0	0	sp|P02666|CASB_BOVIN	43	57
KKIEKFQSEEQQQTED	0	1	0	0	0	0	sp|P02666|CASB_BOVIN	43	58
KKIEKFQSEEQQQTED	0	0	0	0	0	0	sp|P02666|CASB_BOVIN	43	58
KKIEKFQSEEQQQTEDE	0	1	0	0	0	0	sp|P02666|CASB_BOVIN	43	59
KKIEKFQSEEQQQTEDEL	0	1	0	0	0	0	sp|P02666|CASB_BOVIN	43	60
KKIEKFQSEEQQQTEDELQ	0	1	0	0	0	0	sp|P02666|CASB_BOVIN	43	61
KKIEKFQSEEQQQTEDELQ	0	0	0	0	0	1	sp|P02666|CASB_BOVIN	43	61
KKIEKFQSEEQQQTEDELQD	0	1	0	0	0	0	sp|P02666|CASB_BOVIN	43	62
KKIEKFQSEEQQQTEDELQDK	0	1	0	0	0	0	sp|P02666|CASB_BOVIN	43	63
KKIEKFQSEEQQQTEDELQDKIHP	0	1	0	0	0	0	sp|P02666|CASB_BOVIN	43	66
KKIEKFQSEEQQQTEDELQDKIHPF	0	1	0	0	0	0	sp|P02666|CASB_BOVIN	43	67
KKIEKFQSEEQQQTEDELQDKIHPF	0	0	0	0	0	1	sp|P02666|CASB_BOVIN	43	67
KKIEKFQSEEQQQTEDELQDKIHPF	0	0	0	0	0	0	sp|P02666|CASB_BOVIN	43	67
KKIEKFQSEEQQQTEDELQDKIHPFA	0	1	0	0	0	0	sp|P02666|CASB_BOVIN	43	68
KKIEKFQSEEQQQTEDELQDKIHPFAQ	0	1	0	0	0	0	sp|P02666|CASB_BOVIN	43	69
KKIEKFQSEEQQQTEDELQDKIHPFAQTQ	0	0	0	0	0	1	sp|P02666|CASB_BOVIN	43	71
KKIEKFQSEEQQQTEDELQDKIHPFAQTQ	0	1	0	0	0	0	sp|P02666|CASB_BOVIN	43	71
KKIEKFQSEEQQQTEDELQDKIHPFAQTQS	0	1	0	0	0	0	sp|P02666|CASB_BOVIN	43	72
KKTKLTEEEKNRL	0	0	0	0	0	0	sp|P02663|CASA2_BOVIN	164	176
KKTKLTEEEKNRLN	0	0	0	0	0	0	sp|P02663|CASA2_BOVIN	164	177
KKTKLTEEEKNRLNF	0	0	0	0	0	0	sp|P02663|CASA2_BOVIN	164	178
KKTKLTEEEKNRLNFL	0	0	0	0	0	0	sp|P02663|CASA2_BOVIN	164	179
KKTVDMESTE	0	1	0	0	0	0	sp|P02663|CASA2_BOVIN	151	160
KKTVDMESTEVF	0	1	0	0	0	0	sp|P02663|CASA2_BOVIN	151	162
KKTVDMESTEVFTKK	0	1	0	0	0	0	sp|P02663|CASA2_BOVIN	151	165
KKTVDMESTEVFTKKTK	0	1	0	0	0	0	sp|P02663|CASA2_BOVIN	151	167
KKTVDMESTEVFTKKTKLTEEEKNRLN	0	1	0	0	0	0	sp|P02663|CASA2_BOVIN	151	177
KKYKVPQL	0	0	0	0	0	0	sp|P02662|CASA1_BOVIN	117	124
KKYKVPQLE	0	0	0	0	0	0	sp|P02662|CASA1_BOVIN	117	125
KKYKVPQLEIVPN	0	0	0	0	0	0	sp|P02662|CASA1_BOVIN	117	129
KKYKVPQLEIVPN	0	0	0	0	0	1	sp|P02662|CASA1_BOVIN	117	129
KKYKVPQLEIVPNSAE	0	1	0	0	0	0	sp|P02662|CASA1_BOVIN	117	132
KKYKVPQLEIVPNSAEER	0	1	0	0	0	0	sp|P02662|CASA1_BOVIN	117	134
KKYKVPQLEIVPNSAEERL	0	0	0	0	0	0	sp|P02662|CASA1_BOVIN	117	135
KKYKVPQLEIVPNSAEERL	0	1	0	0	0	0	sp|P02662|CASA1_BOVIN	117	135
KKYKVPQLEIVPNSAEERLH	0	0	0	0	0	0	sp|P02662|CASA1_BOVIN	117	136
KKYKVPQLEIVPNSAEERLH	0	1	0	0	0	0	sp|P02662|CASA1_BOVIN	117	136
KKYKVPQLEIVPNSAEERLHS	0	1	0	0	0	0	sp|P02662|CASA1_BOVIN	117	137
KKYKVPQLEIVPNSAEERLHSM	0	1	0	0	0	0	sp|P02662|CASA1_BOVIN	117	138
KKYKVPQLEIVPNSAEERLHSM	0	0	0	0	0	0	sp|P02662|CASA1_BOVIN	117	138
KKYKVPQLEIVPNSAEERLHSMK	0	1	0	0	0	0	sp|P02662|CASA1_BOVIN	117	139
KKYKVPQLEIVPNSAEERLHSMKE	0	1	0	0	0	0	sp|P02662|CASA1_BOVIN	117	140
KKYKVPQLEIVPNSAEERLHSMKEG	0	1	0	0	0	0	sp|P02662|CASA1_BOVIN	117	141
KKYKVPQLEIVPNSAEERLHSMKEGIH	0	1	0	0	0	0	sp|P02662|CASA1_BOVIN	117	143
KKYKVPQLEIVPNSAEERLHSMKEGIH	0	0	0	0	0	0	sp|P02662|CASA1_BOVIN	117	143
KKYKVPQLEIVPNSAEERLHSMKEGIHA	0	1	0	0	0	0	sp|P02662|CASA1_BOVIN	117	144
KKYKVPQLEIVPNSAEERLHSMKEGIHAQ	0	0	0	0	0	0	sp|P02662|CASA1_BOVIN	117	145
KKYKVPQLEIVPNSAEERLHSMKEGIHAQ	0	1	0	0	0	0	sp|P02662|CASA1_BOVIN	117	145
KKYKVPQLEIVPNSAEERLHSMKEGIHAQ	0	0	0	0	0	1	sp|P02662|CASA1_BOVIN	117	145
KKYKVPQLEIVPNSAEERLHSMKEGIHAQQ	0	0	0	0	0	1	sp|P02662|CASA1_BOVIN	117	146
KKYKVPQLEIVPNSAEERLHSMKEGIHAQQKEPMIGV	0	1	0	0	0	0	sp|P02662|CASA1_BOVIN	117	153
KKYKVPQLEIVPNSAEERLHSMKEGIHAQQKEPMIGVN	0	1	0	0	0	0	sp|P02662|CASA1_BOVIN	117	154
KLTEEEKNRL	0	0	0	0	0	0	sp|P02663|CASA2_BOVIN	167	176
KLTEEEKNRLN	0	0	0	0	0	0	sp|P02663|CASA2_BOVIN	167	177
KLTEEEKNRLN	0	0	0	0	0	1	sp|P02663|CASA2_BOVIN	167	177
KLTEEEKNRLNF	0	0	0	0	0	0	sp|P02663|CASA2_BOVIN	167	178
KLTEEEKNRLNFL	0	0	0	0	0	0	sp|P02663|CASA2_BOVIN	167	179
KLTEEEKNRLNFLKK	0	0	0	0	0	0	sp|P02663|CASA2_BOVIN	167	181
KNKMEVKGRE	0	0	1	0	0	0	tr|F1MP22|F1MP22_BOVIN	1340	1349
KNTMEHVSSSEESIISQETYK	0	3	0	0	0	0	sp|P02663|CASA2_BOVIN	16	36
KNTMEHVSSSEESIISQETYKQEK	0	3	0	0	0	0	sp|P02663|CASA2_BOVIN	16	39
KPAAALSAAP	0	0	0	0	0	0	tr|Q1RMR8|Q1RMR8_BOVIN	60	69
KPTPEGDLEIL	0	0	0	0	0	0	sp|P02754|LACB_BOVIN	63	73
KPVALINN	0	0	0	0	0	0	sp|P02668|CASK_BOVIN	67	74
KPWIQPK	0	0	0	0	0	0	sp|P02663|CASA2_BOVIN	206	212
KPWIQPK	0	0	0	0	0	1	sp|P02663|CASA2_BOVIN	206	212
KPWIQPKT	0	0	0	0	0	0	sp|P02663|CASA2_BOVIN	206	213
KPWIQPKTKV	0	0	0	0	0	0	sp|P02663|CASA2_BOVIN	206	215
KPWIQPKTKVIP	0	0	0	0	0	0	sp|P02663|CASA2_BOVIN	206	217
KPWIQPKTKVIPY	0	0	0	0	0	0	sp|P02663|CASA2_BOVIN	206	218
KPWIQPKTKVIPYVR	0	0	0	0	0	0	sp|P02663|CASA2_BOVIN	206	220
KSEPVSPKNGVLPQ	0	0	0	0	0	0	tr|E1BDZ3|E1BDZ3_BOVIN	2075	2088
KTKLTEEEKN	0	0	0	0	0	0	sp|P02663|CASA2_BOVIN	165	174
KTKLTEEEKNRL	0	0	0	0	0	0	sp|P02663|CASA2_BOVIN	165	176
KTKLTEEEKNRL	0	0	0	0	0	1	sp|P02663|CASA2_BOVIN	165	176
KTKLTEEEKNRLN	0	0	0	0	0	0	sp|P02663|CASA2_BOVIN	165	177
KTKLTEEEKNRLN	0	0	0	0	0	1	sp|P02663|CASA2_BOVIN	165	177
KTKLTEEEKNRLNF	0	0	0	0	0	0	sp|P02663|CASA2_BOVIN	165	178
KTKLTEEEKNRLNFL	0	0	0	0	0	0	sp|P02663|CASA2_BOVIN	165	179
KTKLTEEEKNRLNFLK	0	0	0	0	0	0	sp|P02663|CASA2_BOVIN	165	180
KTKLTEEEKNRLNFLK	0	0	0	0	0	1	sp|P02663|CASA2_BOVIN	165	180
KTKLTEEEKNRLNFLKK	0	0	0	0	0	0	sp|P02663|CASA2_BOVIN	165	181
KTKLTEEEKNRLNFLKK	0	0	0	0	0	1	sp|P02663|CASA2_BOVIN	165	181
KTKLTEEEKNRLNFLKKI	0	0	0	0	0	0	sp|P02663|CASA2_BOVIN	165	182
KTKLTEEEKNRLNFLKKIS	0	0	0	0	0	1	sp|P02663|CASA2_BOVIN	165	183
KTKLTEEEKNRLNFLKKIS	0	0	0	0	0	0	sp|P02663|CASA2_BOVIN	165	183
KTKLTEEEKNRLNFLKKISQ	0	0	0	0	0	0	sp|P02663|CASA2_BOVIN	165	184
KTKLTEEEKNRLNFLKKISQ	0	0	0	0	0	1	sp|P02663|CASA2_BOVIN	165	184
KTKLTEEEKNRLNFLKKISQR	0	0	0	0	0	0	sp|P02663|CASA2_BOVIN	165	185
KTKLTEEEKNRLNFLKKISQRY	0	0	0	0	0	0	sp|P02663|CASA2_BOVIN	165	186
KTKLTEEEKNRLNFLKKISQRY	0	0	0	0	0	1	sp|P02663|CASA2_BOVIN	165	186
KTKLTEEEKNRLNFLKKISQRYQ	0	0	0	0	0	0	sp|P02663|CASA2_BOVIN	165	187
KTKLTEEEKNRLNFLKKISQRYQ	0	0	0	0	0	1	sp|P02663|CASA2_BOVIN	165	187
KTKLTEEEKNRLNFLKKISQRYQKF	0	0	0	0	0	1	sp|P02663|CASA2_BOVIN	165	189
KTVDMESTE	0	0	0	0	0	0	sp|P02663|CASA2_BOVIN	152	160
KTVDMESTE	0	1	0	0	0	0	sp|P02663|CASA2_BOVIN	152	160
KTVDMESTEVF	0	0	0	0	0	0	sp|P02663|CASA2_BOVIN	152	162
KTVDMESTEVF	0	1	0	0	0	0	sp|P02663|CASA2_BOVIN	152	162
KTVDMESTEVFTK	0	1	0	0	0	0	sp|P02663|CASA2_BOVIN	152	164
KTVDMESTEVFTKK	0	1	0	0	0	0	sp|P02663|CASA2_BOVIN	152	165
KTVDMESTEVFTKK	0	0	0	0	0	0	sp|P02663|CASA2_BOVIN	152	165
KTVDMESTEVFTKKT	0	1	0	0	0	0	sp|P02663|CASA2_BOVIN	152	166
KTVDMESTEVFTKKTK	0	1	0	0	0	0	sp|P02663|CASA2_BOVIN	152	167
KTVDMESTEVFTKKTKL	0	1	0	0	0	0	sp|P02663|CASA2_BOVIN	152	168
KTVDMESTEVFTKKTKLT	0	1	0	0	0	0	sp|P02663|CASA2_BOVIN	152	169
KTVDMESTEVFTKKTKLTEEEKN	0	1	0	0	0	0	sp|P02663|CASA2_BOVIN	152	174
KTVDMESTEVFTKKTKLTEEEKNRL	0	1	0	0	0	0	sp|P02663|CASA2_BOVIN	152	176
KTVDMESTEVFTKKTKLTEEEKNRLN	0	1	0	0	0	0	sp|P02663|CASA2_BOVIN	152	177
KTVDMESTEVFTKKTKLTEEEKNRLNF	0	1	0	0	0	0	sp|P02663|CASA2_BOVIN	152	178
KTVDMESTEVFTKKTKLTEEEKNRLNFL	0	1	0	0	0	0	sp|P02663|CASA2_BOVIN	152	179
KVIPYVRYL	0	0	0	0	0	0	sp|P02663|CASA2_BOVIN	214	222
KVKEAMAPK	0	0	0	0	0	0	sp|P02666|CASB_BOVIN	112	120
KVKEAMAPKHK	0	0	0	0	0	0	sp|P02666|CASB_BOVIN	112	122
KVKEAMAPKHKEMPFPK	0	0	0	0	0	0	sp|P02666|CASB_BOVIN	112	128
KVKEAMAPKHKEMPFPKYPVEPF	0	0	0	0	0	0	sp|P02666|CASB_BOVIN	112	134
KVKEAMAPKHKEMPFPKYPVEPF	0	0	1	0	0	0	sp|P02666|CASB_BOVIN	112	134
KVKEAMAPKHKEMPFPKYPVEPFTESQ	0	0	0	0	0	0	sp|P02666|CASB_BOVIN	112	138
KVKEAMAPKHKEMPFPKYPVEPFTESQSLTL	0	0	0	0	0	1	sp|P02666|CASB_BOVIN	112	142
KVLPVP	0	0	0	0	0	0	sp|P02666|CASB_BOVIN	184	189
KVLPVPQ	0	0	0	0	0	0	sp|P02666|CASB_BOVIN	184	190
KVLPVPQK	0	0	0	0	0	0	sp|P02666|CASB_BOVIN	184	191
KVLPVPQKAVPYPQ	0	0	0	0	0	0	sp|P02666|CASB_BOVIN	184	197
KVLPVPQKAVPYPQRDMPIQA	0	0	0	0	0	0	sp|P02666|CASB_BOVIN	184	204
KVLPVPQKAVPYPQRDMPIQAF	0	0	0	0	0	0	sp|P02666|CASB_BOVIN	184	205
KVLPVPQKAVPYPQRDMPIQAF	0	0	0	0	0	1	sp|P02666|CASB_BOVIN	184	205
KVLPVPQKAVPYPQRDMPIQAFLLYQEPVL	0	0	0	0	0	1	sp|P02666|CASB_BOVIN	184	213
KVNELSKDIGSESTE	0	2	0	0	0	0	sp|P02662|CASA1_BOVIN	51	65
KVNELSKDIGSESTEDQAMEDIK	0	2	0	0	0	0	sp|P02662|CASA1_BOVIN	51	73
KVPLAG	0	0	0	0	0	0	sp|Q2TBK2|RM09_BOVIN	61	66
KVPQLEIVPNSAE	0	0	0	0	0	1	sp|P02662|CASA1_BOVIN	120	132
KVPQLEIVPNSAEE	0	0	0	0	0	0	sp|P02662|CASA1_BOVIN	120	133
KVPQLEIVPNSAEE	0	0	0	0	0	1	sp|P02662|CASA1_BOVIN	120	133
KVPQLEIVPNSAEE	0	1	0	0	0	0	sp|P02662|CASA1_BOVIN	120	133
KVPQLEIVPNSAEER	0	1	0	0	0	0	sp|P02662|CASA1_BOVIN	120	134
KVPQLEIVPNSAEERL	0	1	0	0	0	0	sp|P02662|CASA1_BOVIN	120	135
KVPQLEIVPNSAEERL	0	0	0	0	0	1	sp|P02662|CASA1_BOVIN	120	135
KVPQLEIVPNSAEERLH	0	0	0	0	0	0	sp|P02662|CASA1_BOVIN	120	136
KVPQLEIVPNSAEERLH	0	1	0	0	0	0	sp|P02662|CASA1_BOVIN	120	136
KVPQLEIVPNSAEERLH	0	0	0	0	0	1	sp|P02662|CASA1_BOVIN	120	136
KVPQLEIVPNSAEERLHS	0	1	0	0	0	0	sp|P02662|CASA1_BOVIN	120	137
KVPQLEIVPNSAEERLHSM	0	1	0	0	0	0	sp|P02662|CASA1_BOVIN	120	138
KVPQLEIVPNSAEERLHSMK	0	1	0	0	0	0	sp|P02662|CASA1_BOVIN	120	139
KVPQLEIVPNSAEERLHSMKEGIH	0	1	0	0	0	0	sp|P02662|CASA1_BOVIN	120	143
KVPQLEIVPNSAEERLHSMKEGIHAQ	0	1	0	0	0	0	sp|P02662|CASA1_BOVIN	120	145
KYIPIQYV	0	0	0	0	0	0	sp|P02668|CASK_BOVIN	45	52
KYKVPQL	0	0	0	0	0	0	sp|P02662|CASA1_BOVIN	118	124
KYKVPQLE	0	0	0	0	0	0	sp|P02662|CASA1_BOVIN	118	125
KYKVPQLEIVPN	0	0	0	0	0	0	sp|P02662|CASA1_BOVIN	118	129
KYKVPQLEIVPNSAE	0	1	0	0	0	0	sp|P02662|CASA1_BOVIN	118	132
KYKVPQLEIVPNSAEER	0	1	0	0	0	0	sp|P02662|CASA1_BOVIN	118	134
KYKVPQLEIVPNSAEERL	0	1	0	0	0	0	sp|P02662|CASA1_BOVIN	118	135
KYKVPQLEIVPNSAEERLH	0	1	0	0	0	0	sp|P02662|CASA1_BOVIN	118	136
KYKVPQLEIVPNSAEERLHSM	0	0	0	0	0	0	sp|P02662|CASA1_BOVIN	118	138
KYKVPQLEIVPNSAEERLHSM	0	1	0	0	0	0	sp|P02662|CASA1_BOVIN	118	138
KYKVPQLEIVPNSAEERLHSMK	0	1	0	0	0	0	sp|P02662|CASA1_BOVIN	118	139
KYKVPQLEIVPNSAEERLHSMKE	0	1	0	0	0	0	sp|P02662|CASA1_BOVIN	118	140
KYKVPQLEIVPNSAEERLHSMKEGIH	0	1	0	0	0	0	sp|P02662|CASA1_BOVIN	118	143
KYKVPQLEIVPNSAEERLHSMKEGIHA	0	1	0	0	0	0	sp|P02662|CASA1_BOVIN	118	144
KYKVPQLEIVPNSAEERLHSMKEGIHAQ	0	0	0	0	0	1	sp|P02662|CASA1_BOVIN	118	145
KYKVPQLEIVPNSAEERLHSMKEGIHAQ	0	1	0	0	0	0	sp|P02662|CASA1_BOVIN	118	145
KYPVEPF	0	0	0	0	0	0	sp|P02666|CASB_BOVIN	128	134
KYPVEPFTES	0	0	0	0	0	0	sp|P02666|CASB_BOVIN	128	137
KYPVEPFTESQ	0	0	0	0	0	0	sp|P02666|CASB_BOVIN	128	138
KYPVEPFTESQSL	0	0	0	0	0	0	sp|P02666|CASB_BOVIN	128	140
KYPVEPFTESQSLTLTDVENLHLPL	0	0	0	0	0	0	sp|P02666|CASB_BOVIN	128	152
KYPVEPFTESQSLTLTDVENLHLPLP	0	0	0	0	0	1	sp|P02666|CASB_BOVIN	128	153
KYPVEPFTESQSLTLTDVENLHLPLPLLQS	0	0	0	0	0	1	sp|P02666|CASB_BOVIN	128	157
LCLRKLIPMRGEVVPVPGAS	0	0	0	0	0	0	tr|Q58DQ8|Q58DQ8_BOVIN	217	236
LDAYPSGAWYYVPLGTQYTDAPSFSDIPNPIGSENSEKTTMPLW	0	0	0	0	0	1	sp|P02662|CASA1_BOVIN	171	214
LDAYPSGAWYYVPLGTQYTDAPSFSDIPNPIGSENSEKTTMPLW	0	0	0	0	0	2	sp|P02662|CASA1_BOVIN	171	214
LDAYPSGAWYYVPLGTQYTDAPSFSDIPNPIGSENSEKTTMPLW	0	0	0	0	0	0	sp|P02662|CASA1_BOVIN	171	214
LDSGGVLSLELQLNVS	0	0	0	0	0	0	sp|A6QLK4|TMM8B_BOVIN	79	94
LDTDYKKY	0	0	0	0	0	0	sp|P02754|LACB_BOVIN	111	118
LEIVPNSAEER	0	1	0	0	0	0	sp|P02662|CASA1_BOVIN	124	134
LEIVPNSAEER	0	0	0	0	0	1	sp|P02662|CASA1_BOVIN	124	134
LEIVPNSAEERL	0	1	0	0	0	0	sp|P02662|CASA1_BOVIN	124	135
LEIVPNSAEERLH	0	0	0	0	0	0	sp|P02662|CASA1_BOVIN	124	136
LEIVPNSAEERLH	0	1	0	0	0	0	sp|P02662|CASA1_BOVIN	124	136
LEIVPNSAEERLH	0	0	0	0	0	1	sp|P02662|CASA1_BOVIN	124	136
LEIVPNSAEERLHSM	0	1	0	0	0	0	sp|P02662|CASA1_BOVIN	124	138
LEIVPNSAEERLHSMK	0	1	0	0	0	0	sp|P02662|CASA1_BOVIN	124	139
LEIVPNSAEERLHSMKEGIH	0	1	0	0	0	0	sp|P02662|CASA1_BOVIN	124	143
LEIVPNSAEERLHSMKEGIHAQ	0	1	0	0	0	0	sp|P02662|CASA1_BOVIN	124	145
LEQLLRLK	0	0	0	0	0	0	sp|P02662|CASA1_BOVIN	110	117
LEQLLRLKK	0	0	0	0	0	0	sp|P02662|CASA1_BOVIN	110	118
LEQLLRLKKY	0	0	0	0	0	0	sp|P02662|CASA1_BOVIN	110	119
LFQPFLKVIEPV	0	0	0	0	0	0	sp|P32871|PK3CA_BOVIN	94	105
LFRQFYQLDAYPS	0	0	0	0	0	0	sp|P02662|CASA1_BOVIN	164	176
LGPVRGPFPI	0	0	0	0	0	0	sp|P02666|CASB_BOVIN	213	222
LGPVRGPFPII	0	0	0	0	0	0	sp|P02666|CASB_BOVIN	213	223
LGPVRGPFPIIV	0	0	0	0	0	0	sp|P02666|CASB_BOVIN	213	224
LGYLEQLLR	0	0	0	0	0	0	sp|P02662|CASA1_BOVIN	107	115
LGYLEQLLRL	0	0	0	0	0	0	sp|P02662|CASA1_BOVIN	107	116
LGYLEQLLRLK	0	0	0	0	0	0	sp|P02662|CASA1_BOVIN	107	117
LGYLEQLLRLKK	0	0	0	0	0	0	sp|P02662|CASA1_BOVIN	107	118
LGYLEQLLRLKKYKVPQLEIVPNSAEERLH	0	1	0	0	0	0	sp|P02662|CASA1_BOVIN	107	136
LHLPLPLL	0	0	0	0	0	0	sp|P02666|CASB_BOVIN	148	155
LHLPLPLLQ	0	0	0	0	0	0	sp|P02666|CASB_BOVIN	148	156
LHLPLPLLQS	0	0	0	0	0	0	sp|P02666|CASB_BOVIN	148	157
LHSMKEGIH	0	0	0	0	0	0	sp|P02662|CASA1_BOVIN	135	143
LHSMKEGIHAQ	0	0	0	0	0	0	sp|P02662|CASA1_BOVIN	135	145
LHSMKEGIHAQQKEPMIGVN	0	0	0	0	0	0	sp|P02662|CASA1_BOVIN	135	154
LHSMKEGIHAQQKEPMIGVNQELA	0	0	0	0	0	0	sp|P02662|CASA1_BOVIN	135	158
LHSMKEGIHAQQKEPMIGVNQELA	0	0	0	0	0	1	sp|P02662|CASA1_BOVIN	135	158
LHSMKEGIHAQQKEPMIGVNQELAY	0	0	0	0	0	1	sp|P02662|CASA1_BOVIN	135	159
LIESQENSKL	0	1	0	0	0	0	sp|P31098|OSTK_BOVIN	229	238
LINNQFLPYPYYAKPA	0	0	0	0	0	0	sp|P02668|CASK_BOVIN	71	86
LISKEQIVIR	0	1	0	0	0	0	sp|P80195|GLCM1_BOVIN	62	71
LKKYKVPQLEIVPNSAEER	0	1	0	0	0	0	sp|P02662|CASA1_BOVIN	116	134
LKKYKVPQLEIVPNSAEERL	0	1	0	0	0	0	sp|P02662|CASA1_BOVIN	116	135
LKKYKVPQLEIVPNSAEERLH	0	1	0	0	0	0	sp|P02662|CASA1_BOVIN	116	136
LKKYKVPQLEIVPNSAEERLHSM	0	1	0	0	0	0	sp|P02662|CASA1_BOVIN	116	138
LKKYKVPQLEIVPNSAEERLHSMK	0	1	0	0	0	0	sp|P02662|CASA1_BOVIN	116	139
LKKYKVPQLEIVPNSAEERLHSMKEGIH	0	1	0	0	0	0	sp|P02662|CASA1_BOVIN	116	143
LKKYKVPQLEIVPNSAEERLHSMKEGIHAQ	0	1	0	0	0	0	sp|P02662|CASA1_BOVIN	116	145
LLPGELAKHAVSEGTK	0	0	0	0	0	0	sp|Q2M2T1|H2B1K_BOVIN	102	117
LLQSWMHQPHQPLPPTVMFPPQ	0	0	0	0	0	0	sp|P02666|CASB_BOVIN	154	175
LLRLKKYKVPQLEIVPNSAEERL	0	1	0	0	0	0	sp|P02662|CASA1_BOVIN	113	135
LLRLKKYKVPQLEIVPNSAEERLH	0	1	0	0	0	0	sp|P02662|CASA1_BOVIN	113	136
LLRLKKYKVPQLEIVPNSAEERLHSM	0	1	0	0	0	0	sp|P02662|CASA1_BOVIN	113	138
LLYQEPVLGPV	0	0	0	0	0	0	sp|P02666|CASB_BOVIN	206	216
LLYQEPVLGPVR	0	0	0	0	0	0	sp|P02666|CASB_BOVIN	206	217
LLYQEPVLGPVRGP	0	0	0	0	0	0	sp|P02666|CASB_BOVIN	206	219
LLYQEPVLGPVRGPF	0	0	0	0	0	0	sp|P02666|CASB_BOVIN	206	220
LLYQEPVLGPVRGPFP	0	0	0	0	0	0	sp|P02666|CASB_BOVIN	206	221
LLYQEPVLGPVRGPFPI	0	0	0	0	0	0	sp|P02666|CASB_BOVIN	206	222
LLYQEPVLGPVRGPFPII	0	0	0	0	0	0	sp|P02666|CASB_BOVIN	206	223
LLYQEPVLGPVRGPFPIIV	0	0	0	0	0	0	sp|P02666|CASB_BOVIN	206	224
LLYQEPVLGPVRGPFPIIV	0	0	0	0	0	1	sp|P02666|CASB_BOVIN	206	224
LMNSRSLELFSIDPQ	0	0	1	0	0	0	tr|F1MHH5|F1MHH5_BOVIN	366	380
LNEINQFYQKFPQ	0	0	0	0	0	0	sp|P02663|CASA2_BOVIN	97	109
LNEINQFYQKFPQY	0	0	0	0	0	0	sp|P02663|CASA2_BOVIN	97	110
LNEINQFYQKFPQYLQYLYQGPIVLNPWDQVKR	0	0	0	0	0	2	sp|P02663|CASA2_BOVIN	97	129
LNENLLRF	0	0	0	0	0	0	sp|P02662|CASA1_BOVIN	31	38
LNFLKKIS	0	0	0	0	0	0	sp|P02663|CASA2_BOVIN	176	183
LNKPEDETHL	0	0	0	0	0	0	sp|P80195|GLCM1_BOVIN	20	29
LNKPEDETHLE	0	0	0	0	0	0	sp|P80195|GLCM1_BOVIN	20	30
LNPWDQVKR	0	0	0	0	0	0	sp|P02663|CASA2_BOVIN	121	129
LNPWDQVKRN	0	0	0	0	0	0	sp|P02663|CASA2_BOVIN	121	130
LNREQLSTSEEN	0	0	0	0	0	0	sp|P02663|CASA2_BOVIN	138	149
LNREQLSTSEENS	0	1	0	0	0	0	sp|P02663|CASA2_BOVIN	138	150
LNREQLSTSEENS	0	0	0	0	0	0	sp|P02663|CASA2_BOVIN	138	150
LNREQLSTSEENSK	0	2	0	0	0	0	sp|P02663|CASA2_BOVIN	138	151
LNREQLSTSEENSK	0	1	0	0	0	0	sp|P02663|CASA2_BOVIN	138	151
LNREQLSTSEENSK	0	0	0	0	0	1	sp|P02663|CASA2_BOVIN	138	151
LNREQLSTSEENSKK	0	2	0	0	0	0	sp|P02663|CASA2_BOVIN	138	152
LNREQLSTSEENSKK	0	0	0	0	0	0	sp|P02663|CASA2_BOVIN	138	152
LNREQLSTSEENSKK	0	1	0	0	0	0	sp|P02663|CASA2_BOVIN	138	152
LNREQLSTSEENSKK	0	3	0	0	0	0	sp|P02663|CASA2_BOVIN	138	152
LNREQLSTSEENSKKT	0	2	0	0	0	0	sp|P02663|CASA2_BOVIN	138	153
LNREQLSTSEENSKKT	0	1	0	0	0	0	sp|P02663|CASA2_BOVIN	138	153
LNREQLSTSEENSKKTV	0	2	0	0	0	0	sp|P02663|CASA2_BOVIN	138	154
LNREQLSTSEENSKKTV	0	3	0	0	0	0	sp|P02663|CASA2_BOVIN	138	154
LNREQLSTSEENSKKTVD	0	1	0	0	0	0	sp|P02663|CASA2_BOVIN	138	155
LNREQLSTSEENSKKTVD	0	2	0	0	0	0	sp|P02663|CASA2_BOVIN	138	155
LNREQLSTSEENSKKTVD	0	3	0	0	0	0	sp|P02663|CASA2_BOVIN	138	155
LNREQLSTSEENSKKTVDME	0	1	0	0	0	0	sp|P02663|CASA2_BOVIN	138	157
LNREQLSTSEENSKKTVDME	0	2	0	0	0	0	sp|P02663|CASA2_BOVIN	138	157
LNREQLSTSEENSKKTVDMESTEVFTK	0	1	0	0	0	0	sp|P02663|CASA2_BOVIN	138	164
LNREQLSTSEENSKKTVDMESTEVFTK	0	3	0	0	0	0	sp|P02663|CASA2_BOVIN	138	164
LNREQLSTSEENSKKTVDMESTEVFTK	0	2	0	0	0	0	sp|P02663|CASA2_BOVIN	138	164
LNREQLSTSEENSKKTVDMESTEVFTKK	0	3	0	0	0	0	sp|P02663|CASA2_BOVIN	138	165
LNREQLSTSEENSKKTVDMESTEVFTKK	0	1	0	0	0	0	sp|P02663|CASA2_BOVIN	138	165
LNREQLSTSEENSKKTVDMESTEVFTKK	0	2	0	0	0	0	sp|P02663|CASA2_BOVIN	138	165
LNREQLSTSEENSKKTVDMESTEVFTKKT	0	3	0	0	0	0	sp|P02663|CASA2_BOVIN	138	166
LNREQLSTSEENSKKTVDMESTEVFTKKTK	0	1	0	0	0	0	sp|P02663|CASA2_BOVIN	138	167
LNREQLSTSEENSKKTVDMESTEVFTKKTK	0	3	0	0	0	0	sp|P02663|CASA2_BOVIN	138	167
LNREQLSTSEENSKKTVDMESTEVFTKKTKL	0	3	0	0	0	0	sp|P02663|CASA2_BOVIN	138	168
LNREQLSTSEENSKKTVDMESTEVFTKKTKLT	0	3	0	0	0	0	sp|P02663|CASA2_BOVIN	138	169
LNREQLSTSEENSKKTVDMESTEVFTKKTKLTEEEKN	0	3	0	0	0	0	sp|P02663|CASA2_BOVIN	138	174
LNREQLSTSEENSKKTVDMESTEVFTKKTKLTEEEKNRLN	0	3	0	0	0	0	sp|P02663|CASA2_BOVIN	138	177
LPCLPSEEWPNPPT	0	0	0	0	0	0	sp|Q2HJD0|FAF2_BOVIN	412	425
LPLNDVAQAQRSRPELTAR	0	0	0	0	0	0	tr|F1MTM9|F1MTM9_BOVIN	670	688
LPLPLL	0	0	0	0	0	0	sp|P02666|CASB_BOVIN	150	155
LPLPLLQSWMHQPHQPLPPT	0	0	0	0	0	0	sp|P02666|CASB_BOVIN	150	169
LPPDVEFNRPF	0	0	0	0	0	0	sp|P34955|A1AT_BOVIN	382	392
LPPTVMFPPQ	0	0	1	0	0	0	sp|P02666|CASB_BOVIN	166	175
LPPTVMFPPQ	0	0	0	0	0	0	sp|P02666|CASB_BOVIN	166	175
LPQEVLNENLL	0	0	0	0	0	0	sp|P02662|CASA1_BOVIN	26	36
LPQEVLNENLLR	0	0	0	0	0	0	sp|P02662|CASA1_BOVIN	26	37
LPQNIPPLTQTPV	0	0	0	0	0	0	sp|P02666|CASB_BOVIN	85	97
LPQNIPPLTQTPVVVPPF	0	0	0	0	0	0	sp|P02666|CASB_BOVIN	85	102
LPQYLKT	0	0	0	0	0	0	sp|P02663|CASA2_BOVIN	191	197
LPQYLKTV	0	0	0	0	0	0	sp|P02663|CASA2_BOVIN	191	198
LPQYLKTVY	0	0	0	0	0	0	sp|P02663|CASA2_BOVIN	191	199
LPQYLKTVYQ	0	0	0	0	0	0	sp|P02663|CASA2_BOVIN	191	200
LPQYLKTVYQH	0	0	0	0	0	0	sp|P02663|CASA2_BOVIN	191	201
LPQYLKTVYQHQ	0	0	0	0	0	0	sp|P02663|CASA2_BOVIN	191	202
LPQYLKTVYQHQK	0	0	0	0	0	0	sp|P02663|CASA2_BOVIN	191	203
LPQYLKTVYQHQKA	0	0	0	0	0	0	sp|P02663|CASA2_BOVIN	191	204
LPVPQKAVPY	0	0	0	0	0	0	sp|P02666|CASB_BOVIN	186	195
LPVPQKAVPYPQ	0	0	0	0	0	0	sp|P02666|CASB_BOVIN	186	197
LPVPQKAVPYPQ	0	0	0	0	0	1	sp|P02666|CASB_BOVIN	186	197
LPVPQKAVPYPQRDMP	0	0	0	0	0	0	sp|P02666|CASB_BOVIN	186	201
LPVPQKAVPYPQRDMPIQA	0	0	0	0	0	0	sp|P02666|CASB_BOVIN	186	204
LPVPQKAVPYPQRDMPIQAF	0	0	0	0	0	0	sp|P02666|CASB_BOVIN	186	205
LPYPYYAKPA	0	0	0	0	0	0	sp|P02668|CASK_BOVIN	77	86
LQPEVMGVS	0	0	0	0	0	0	sp|P02666|CASB_BOVIN	103	111
LQPEVMGVSK	0	0	0	0	0	0	sp|P02666|CASB_BOVIN	103	112
LQPEVMGVSKVK	0	0	0	0	0	0	sp|P02666|CASB_BOVIN	103	114
LQPEVMGVSKVKE	0	0	0	0	0	0	sp|P02666|CASB_BOVIN	103	115
LQPEVMGVSKVKEA	0	0	0	0	0	0	sp|P02666|CASB_BOVIN	103	116
LQPEVMGVSKVKEAMAPK	0	0	0	0	0	0	sp|P02666|CASB_BOVIN	103	120
LQPEVMGVSKVKEAMAPKHK	0	0	1	0	0	0	sp|P02666|CASB_BOVIN	103	122
LQPEVMGVSKVKEAMAPKHK	0	0	0	0	0	0	sp|P02666|CASB_BOVIN	103	122
LQSWMHQPHQPLPPT	0	0	0	0	0	0	sp|P02666|CASB_BOVIN	155	169
LQSWMHQPHQPLPPT	0	0	1	0	0	0	sp|P02666|CASB_BOVIN	155	169
LQSWMHQPHQPLPPT	0	0	0	0	0	1	sp|P02666|CASB_BOVIN	155	169
LQSWMHQPHQPLPPTVMFPPQ	0	0	0	0	0	0	sp|P02666|CASB_BOVIN	155	175
LQSWMHQPHQPLPPTVMFPPQ	0	0	1	0	0	0	sp|P02666|CASB_BOVIN	155	175
LQSWMHQPHQPLPPTVMFPPQS	0	0	0	0	0	0	sp|P02666|CASB_BOVIN	155	176
LQSWMHQPHQPLPPTVMFPPQS	0	0	0	0	0	1	sp|P02666|CASB_BOVIN	155	176
LQSWMHQPHQPLPPTVMFPPQSV	0	0	0	0	0	1	sp|P02666|CASB_BOVIN	155	177
LQSWMHQPHQPLPPTVMFPPQSV	0	0	0	0	0	0	sp|P02666|CASB_BOVIN	155	177
LQSWMHQPHQPLPPTVMFPPQSVL	0	0	0	0	0	0	sp|P02666|CASB_BOVIN	155	178
LQSWMHQPHQPLPPTVMFPPQSVL	0	0	0	0	0	1	sp|P02666|CASB_BOVIN	155	178
LQSWMHQPHQPLPPTVMFPPQSVLSL	0	0	0	0	0	1	sp|P02666|CASB_BOVIN	155	180
LQSWMHQPHQPLPPTVMFPPQSVLSL	0	0	0	0	0	0	sp|P02666|CASB_BOVIN	155	180
LQYLYQGPIVLNPWDQVK	0	0	0	0	0	0	sp|P02663|CASA2_BOVIN	111	128
LQYLYQGPIVLNPWDQVKR	0	0	0	0	0	0	sp|P02663|CASA2_BOVIN	111	129
LQYLYQGPIVLNPWDQVKRN	0	0	0	0	0	0	sp|P02663|CASA2_BOVIN	111	130
LQYLYQGPIVLNPWDQVKRNAVPITPT	0	0	0	0	0	1	sp|P02663|CASA2_BOVIN	111	137
LQYLYQGPIVLNPWDQVKRNAVPITPT	0	0	0	0	0	0	sp|P02663|CASA2_BOVIN	111	137
LQYLYQGPIVLNPWDQVKRNAVPITPTL	0	0	0	0	0	1	sp|P02663|CASA2_BOVIN	111	138
LRLKKYKVPQLEIVPN	0	0	0	0	0	0	sp|P02662|CASA1_BOVIN	114	129
LRLKKYKVPQLEIVPNSAE	0	1	0	0	0	0	sp|P02662|CASA1_BOVIN	114	132
LRLKKYKVPQLEIVPNSAEER	0	1	0	0	0	0	sp|P02662|CASA1_BOVIN	114	134
LRLKKYKVPQLEIVPNSAEERL	0	1	0	0	0	0	sp|P02662|CASA1_BOVIN	114	135
LRLKKYKVPQLEIVPNSAEERLH	0	1	0	0	0	0	sp|P02662|CASA1_BOVIN	114	136
LRLKKYKVPQLEIVPNSAEERLHS	0	1	0	0	0	0	sp|P02662|CASA1_BOVIN	114	137
LRLKKYKVPQLEIVPNSAEERLHSM	0	1	0	0	0	0	sp|P02662|CASA1_BOVIN	114	138
LRLKKYKVPQLEIVPNSAEERLHSMKEGIHA	0	0	1	0	0	0	sp|P02662|CASA1_BOVIN	114	144
LRLKKYKVPQLEIVPNSAEERLHSMKEGIHAQ	0	1	0	0	0	0	sp|P02662|CASA1_BOVIN	114	145
LSDPSQDLQF	0	0	0	0	0	0	tr|F1N5Q5|F1N5Q5_BOVIN	238	247
LSFRHKVTGLHSGTLQ	0	0	0	0	0	0	tr|E1BBK6|E1BBK6_BOVIN	512	527
LSKDIGSESTE	0	2	0	0	0	0	sp|P02662|CASA1_BOVIN	55	65
LSKDIGSESTE	0	1	0	0	0	0	sp|P02662|CASA1_BOVIN	55	65
LSKDIGSESTE	0	0	0	0	0	0	sp|P02662|CASA1_BOVIN	55	65
LSKDIGSESTED	0	0	0	0	0	0	sp|P02662|CASA1_BOVIN	55	66
LSKDIGSESTEDQ	0	0	0	0	0	0	sp|P02662|CASA1_BOVIN	55	67
LSKDIGSESTEDQA	0	0	0	0	0	0	sp|P02662|CASA1_BOVIN	55	68
LSKDIGSESTEDQAM	0	1	0	0	0	0	sp|P02662|CASA1_BOVIN	55	69
LSKDIGSESTEDQAM	0	0	1	0	0	0	sp|P02662|CASA1_BOVIN	55	69
LSKDIGSESTEDQAMEDIK	0	2	0	0	0	0	sp|P02662|CASA1_BOVIN	55	73
LSKDIGSESTEDQAMEDIK	0	0	1	0	0	0	sp|P02662|CASA1_BOVIN	55	73
LSKDIGSESTEDQAMEDIK	0	0	0	0	0	0	sp|P02662|CASA1_BOVIN	55	73
LSKDIGSESTEDQAMEDIKQ	0	2	0	0	0	0	sp|P02662|CASA1_BOVIN	55	74
LSKDIGSESTEDQAMEDIKQM	0	2	0	0	0	0	sp|P02662|CASA1_BOVIN	55	75
LSLSQSKVLPVPQ	0	0	0	0	0	0	sp|P02666|CASB_BOVIN	178	190
LSLSQSKVLPVPQK	0	0	0	0	0	0	sp|P02666|CASB_BOVIN	178	191
LSLSQSKVLPVPQKAVPYPQ	0	0	0	0	0	0	sp|P02666|CASB_BOVIN	178	197
LSLSQSKVLPVPQKAVPYPQRDMPIQ	0	0	0	0	0	0	sp|P02666|CASB_BOVIN	178	203
LSLSQSKVLPVPQKAVPYPQRDMPIQ	0	0	0	0	0	1	sp|P02666|CASB_BOVIN	178	203
LSLSQSKVLPVPQKAVPYPQRDMPIQA	0	0	0	0	0	1	sp|P02666|CASB_BOVIN	178	204
LSLSQSKVLPVPQKAVPYPQRDMPIQA	0	2	0	0	0	0	sp|P02666|CASB_BOVIN	178	204
LSLSQSKVLPVPQKAVPYPQRDMPIQA	0	0	0	0	0	0	sp|P02666|CASB_BOVIN	178	204
LSLSQSKVLPVPQKAVPYPQRDMPIQAF	0	0	0	0	0	0	sp|P02666|CASB_BOVIN	178	205
LSLSQSKVLPVPQKAVPYPQRDMPIQAF	0	0	0	0	0	1	sp|P02666|CASB_BOVIN	178	205
LSLSQSKVLPVPQKAVPYPQRDMPIQAFL	0	0	0	0	0	1	sp|P02666|CASB_BOVIN	178	206
LSLSQSKVLPVPQKAVPYPQRDMPIQAFLL	0	0	0	0	0	1	sp|P02666|CASB_BOVIN	178	207
LSLSQSKVLPVPQKAVPYPQRDMPIQAFLL	0	0	0	0	0	0	sp|P02666|CASB_BOVIN	178	207
LSLSQSKVLPVPQKAVPYPQRDMPIQAFLLYQEPVL	0	0	0	0	0	1	sp|P02666|CASB_BOVIN	178	213
LSLSQSKVLPVPQKAVPYPQRDMPIQAFLLYQEPVLGPV	0	0	0	0	0	1	sp|P02666|CASB_BOVIN	178	216
LSQSKVLPVPQ	0	0	0	0	0	0	sp|P02666|CASB_BOVIN	180	190
LSQSKVLPVPQK	0	0	0	0	0	0	sp|P02666|CASB_BOVIN	180	191
LSQSKVLPVPQKAVPYPQ	0	0	0	0	0	0	sp|P02666|CASB_BOVIN	180	197
LSQSKVLPVPQKAVPYPQRDMPIQA	0	0	0	0	0	1	sp|P02666|CASB_BOVIN	180	204
LSQSKVLPVPQKAVPYPQRDMPIQA	0	0	0	0	0	0	sp|P02666|CASB_BOVIN	180	204
LSQSKVLPVPQKAVPYPQRDMPIQAF	0	0	0	0	0	0	sp|P02666|CASB_BOVIN	180	205
LSQSKVLPVPQKAVPYPQRDMPIQAFLLYQEPVL	0	0	0	0	0	1	sp|P02666|CASB_BOVIN	180	213
LSSSEESITR	0	0	0	0	0	0	sp|P02666|CASB_BOVIN	31	40
LSTSEENSKKTVD	0	1	0	0	0	0	sp|P02663|CASA2_BOVIN	143	155
LTDVENLHLPLPL	0	0	0	0	0	0	sp|P02666|CASB_BOVIN	142	154
LTDVENLHLPLPLL	0	0	0	0	0	0	sp|P02666|CASB_BOVIN	142	155
LTDVENLHLPLPLLQ	0	0	0	0	0	0	sp|P02666|CASB_BOVIN	142	156
LTDVENLHLPLPLLQ	0	0	0	0	0	1	sp|P02666|CASB_BOVIN	142	156
LTDVENLHLPLPLLQS	0	0	0	0	0	0	sp|P02666|CASB_BOVIN	142	157
LTDVENLHLPLPLLQSW	0	0	0	0	0	0	sp|P02666|CASB_BOVIN	142	158
LTDVENLHLPLPLLQSWM	0	0	0	0	0	0	sp|P02666|CASB_BOVIN	142	159
LTDVENLHLPLPLLQSWMHQPHQPLPPT	0	0	0	0	0	1	sp|P02666|CASB_BOVIN	142	169
LTDVENLHLPLPLLQSWMHQPHQPLPPT	0	0	0	0	0	0	sp|P02666|CASB_BOVIN	142	169
LTDVENLHLPLPLLQSWMHQPHQPLPPTVMFPPQ	0	0	0	0	0	1	sp|P02666|CASB_BOVIN	142	175
LTDVENLHLPLPLLQSWMHQPHQPLPPTVMFPPQSVL	0	0	0	0	0	2	sp|P02666|CASB_BOVIN	142	178
LTEEEKNRL	0	0	0	0	0	0	sp|P02663|CASA2_BOVIN	168	176
LTEEEKNRLN	0	0	0	0	0	0	sp|P02663|CASA2_BOVIN	168	177
LTEEEKNRLN	0	0	0	0	0	1	sp|P02663|CASA2_BOVIN	168	177
LTEEEKNRLNF	0	0	0	0	0	0	sp|P02663|CASA2_BOVIN	168	178
LTEEEKNRLNFL	0	0	0	0	0	0	sp|P02663|CASA2_BOVIN	168	179
LTEEEKNRLNFLK	0	0	0	0	0	0	sp|P02663|CASA2_BOVIN	168	180
LTEEEKNRLNFLKK	0	0	0	0	0	0	sp|P02663|CASA2_BOVIN	168	181
LTEEEKNRLNFLKKI	0	0	0	0	0	0	sp|P02663|CASA2_BOVIN	168	182
LTEEEKNRLNFLKKISQ	0	0	0	0	0	0	sp|P02663|CASA2_BOVIN	168	184
LTEEEKNRLNFLKKISQR	0	0	0	0	0	0	sp|P02663|CASA2_BOVIN	168	185
LTEEEKNRLNFLKKISQRY	0	0	0	0	0	0	sp|P02663|CASA2_BOVIN	168	186
LTEEEKNRLNFLKKISQRYQ	0	0	0	0	0	0	sp|P02663|CASA2_BOVIN	168	187
LTEEEKNRLNFLKKISQRYQK	0	0	0	0	0	1	sp|P02663|CASA2_BOVIN	168	188
LTEEEKNRLNFLKKISQRYQKF	0	0	0	0	0	1	sp|P02663|CASA2_BOVIN	168	189
LTLTDVENLHLPLP	0	0	0	0	0	0	sp|P02666|CASB_BOVIN	140	153
LTLTDVENLHLPLPL	0	0	0	0	0	0	sp|P02666|CASB_BOVIN	140	154
LTLTDVENLHLPLPLLQSWMHQPHQPLPPTVMFPPQ	0	0	0	0	0	1	sp|P02666|CASB_BOVIN	140	175
LTLTDVENLHLPLPLLQSWMHQPHQPLPPTVMFPPQSVL	0	0	0	0	0	2	sp|P02666|CASB_BOVIN	140	178
LTLTDVENLHLPLPLLQSWMHQPHQPLPPTVMFPPQSVL	0	0	0	0	0	1	sp|P02666|CASB_BOVIN	140	178
LTLTDVENLHLPLPLLQSWMHQPHQPLPPTVMFPPQSVLSL	0	0	0	0	0	2	sp|P02666|CASB_BOVIN	140	180
LTPGAP	0	1	0	0	0	0	tr|E1BN28|E1BN28_BOVIN	779	784
LVPGGGV	0	0	0	0	0	0	tr|F1MFY5|F1MFY5_BOVIN	1097	1103
LVRTPEVDDEALE	0	0	0	0	0	0	sp|P02754|LACB_BOVIN	138	150
LVYPFPGPI	0	0	0	0	0	0	sp|P02666|CASB_BOVIN	73	81
LVYPFPGPIPN	0	0	0	0	0	0	sp|P02666|CASB_BOVIN	73	83
LVYPFPGPIPNS	0	0	0	0	0	0	sp|P02666|CASB_BOVIN	73	84
LVYPFPGPIPNSLPQ	0	0	0	0	0	0	sp|P02666|CASB_BOVIN	73	87
LVYPFPGPIPNSLPQNIPPL	0	0	0	0	0	0	sp|P02666|CASB_BOVIN	73	92
LVYPFPGPIPNSLPQNIPPLTQTPVVVPPF	0	0	0	0	0	0	sp|P02666|CASB_BOVIN	73	102
LVYPFPGPIPNSLPQNIPPLTQTPVVVPPFLQPEVMG	0	0	0	0	0	1	sp|P02666|CASB_BOVIN	73	109
LVYPFPGPIPNSLPQNIPPLTQTPVVVPPFLQPEVMG	0	0	0	0	0	0	sp|P02666|CASB_BOVIN	73	109
LYNRTPEQVAEEEYLLQELRKI	0	0	0	0	0	0	tr|Q1LZ99|Q1LZ99_BOVIN	233	254
LYNRTPEQVAEEEYLLQELRKI	0	0	0	0	0	1	tr|Q1LZ99|Q1LZ99_BOVIN	233	254
LYQEPVLGPV	0	0	0	0	0	0	sp|P02666|CASB_BOVIN	207	216
LYQEPVLGPVRGP	0	0	0	0	0	0	sp|P02666|CASB_BOVIN	207	219
LYQEPVLGPVRGPF	0	0	0	0	0	0	sp|P02666|CASB_BOVIN	207	220
LYQEPVLGPVRGPFP	0	0	0	0	0	0	sp|P02666|CASB_BOVIN	207	221
LYQEPVLGPVRGPFPI	0	0	0	0	0	0	sp|P02666|CASB_BOVIN	207	222
LYQEPVLGPVRGPFPII	0	0	0	0	0	0	sp|P02666|CASB_BOVIN	207	223
LYQEPVLGPVRGPFPIIV	0	0	0	0	0	1	sp|P02666|CASB_BOVIN	207	224
LYQEPVLGPVRGPFPIIV	0	0	0	0	0	0	sp|P02666|CASB_BOVIN	207	224
LYQGPIVLNPWDQVK	0	0	0	0	0	0	sp|P02663|CASA2_BOVIN	114	128
LYQGPIVLNPWDQVK	0	0	0	0	0	1	sp|P02663|CASA2_BOVIN	114	128
LYQGPIVLNPWDQVKR	0	0	0	0	0	0	sp|P02663|CASA2_BOVIN	114	129
LYQGPIVLNPWDQVKR	0	0	0	0	0	1	sp|P02663|CASA2_BOVIN	114	129
LYQGPIVLNPWDQVKRN	0	0	0	0	0	0	sp|P02663|CASA2_BOVIN	114	130
LYQGPIVLNPWDQVKRN	0	0	0	0	0	1	sp|P02663|CASA2_BOVIN	114	130
LYQGPIVLNPWDQVKRNAVP	0	0	0	0	0	0	sp|P02663|CASA2_BOVIN	114	133
MAINPSKENLCSTFCKEVVR	0	0	0	0	0	0	sp|P02663|CASA2_BOVIN	41	60
MAINPSKENLCSTFCKEVVR	0	0	0	0	0	1	sp|P02663|CASA2_BOVIN	41	60
MAPKHKEMPF	0	0	0	0	0	0	sp|P02666|CASB_BOVIN	117	126
MAPKHKEMPFPKYPVEPF	0	0	1	0	0	0	sp|P02666|CASB_BOVIN	117	134
MAPKHKEMPFPKYPVEPF	0	0	0	0	0	0	sp|P02666|CASB_BOVIN	117	134
MAPKHKEMPFPKYPVEPFTESQ	0	0	0	0	0	0	sp|P02666|CASB_BOVIN	117	138
MARHPHPHLSF	0	0	0	0	0	0	sp|P02668|CASK_BOVIN	116	126
MEDIKQM	0	0	0	0	0	0	sp|P02662|CASA1_BOVIN	69	75
MESTEVFTK	0	1	0	0	0	0	sp|P02663|CASA2_BOVIN	156	164
MESTEVFTK	0	0	0	0	0	0	sp|P02663|CASA2_BOVIN	156	164
MESTEVFTKK	0	1	0	0	0	0	sp|P02663|CASA2_BOVIN	156	165
MESTEVFTKKTK	0	1	0	0	0	0	sp|P02663|CASA2_BOVIN	156	167
MESTEVFTKKTKLTEEEKNRLN	0	1	0	0	0	0	sp|P02663|CASA2_BOVIN	156	177
MGLLMGEARAALKWADGKMI	0	0	1	0	0	0	sp|Q3MHH4|SYQ_BOVIN	146	165
MGVSKVKE	0	0	0	0	0	0	sp|P02666|CASB_BOVIN	108	115
MGVSKVKEA	0	0	0	0	0	0	sp|P02666|CASB_BOVIN	108	116
MGVSKVKEAM	0	0	0	0	0	0	sp|P02666|CASB_BOVIN	108	117
MGVSKVKEAMAPK	0	0	0	0	0	0	sp|P02666|CASB_BOVIN	108	120
MGVSKVKEAMAPKHK	0	0	0	0	0	0	sp|P02666|CASB_BOVIN	108	122
MHQPHQPLPPT	0	0	1	0	0	0	sp|P02666|CASB_BOVIN	159	169
MHQPHQPLPPT	0	0	0	0	0	0	sp|P02666|CASB_BOVIN	159	169
MHQPHQPLPPTV	0	0	0	0	0	0	sp|P02666|CASB_BOVIN	159	170
MHQPHQPLPPTVM	0	0	0	0	0	0	sp|P02666|CASB_BOVIN	159	171
MHQPHQPLPPTVMFPPQ	0	0	1	0	0	0	sp|P02666|CASB_BOVIN	159	175
MHQPHQPLPPTVMFPPQ	0	0	0	0	0	0	sp|P02666|CASB_BOVIN	159	175
MHQPHQPLPPTVMFPPQ	0	0	0	0	0	1	sp|P02666|CASB_BOVIN	159	175
MHQPHQPLPPTVMFPPQ	0	0	2	0	0	0	sp|P02666|CASB_BOVIN	159	175
MHQPHQPLPPTVMFPPQS	0	0	0	0	0	0	sp|P02666|CASB_BOVIN	159	176
MHQPHQPLPPTVMFPPQSV	0	0	0	0	0	0	sp|P02666|CASB_BOVIN	159	177
MHQPHQPLPPTVMFPPQSVL	0	0	1	0	0	0	sp|P02666|CASB_BOVIN	159	178
MHQPHQPLPPTVMFPPQSVL	0	0	0	0	0	0	sp|P02666|CASB_BOVIN	159	178
MHQPHQPLPPTVMFPPQSVL	0	0	0	0	0	1	sp|P02666|CASB_BOVIN	159	178
MHQPHQPLPPTVMFPPQSVLS	0	0	0	0	0	0	sp|P02666|CASB_BOVIN	159	179
MHQPHQPLPPTVMFPPQSVLSL	0	0	1	0	0	0	sp|P02666|CASB_BOVIN	159	180
MHQPHQPLPPTVMFPPQSVLSL	0	0	0	0	0	0	sp|P02666|CASB_BOVIN	159	180
MHQPHQPLPPTVMFPPQSVLSL	0	0	0	0	0	1	sp|P02666|CASB_BOVIN	159	180
MHQPHQPLPPTVMFPPQSVLSLS	0	0	0	0	0	1	sp|P02666|CASB_BOVIN	159	181
MHQPHQPLPPTVMFPPQSVLSLS	0	0	0	0	0	0	sp|P02666|CASB_BOVIN	159	181
MHQPHQPLPPTVMFPPQSVLSLSQ	0	0	0	0	0	0	sp|P02666|CASB_BOVIN	159	182
MHQPHQPLPPTVMFPPQSVLSLSQ	0	0	0	0	0	1	sp|P02666|CASB_BOVIN	159	182
MHQPHQPLPPTVMFPPQSVLSLSQSK	0	0	0	0	0	0	sp|P02666|CASB_BOVIN	159	184
MHQPHQPLPPTVMFPPQSVLSLSQSKVLPVPQ	0	0	0	0	0	0	sp|P02666|CASB_BOVIN	159	190
MHQPHQPLPPTVMFPPQSVLSLSQSKVLPVPQ	0	0	0	0	0	1	sp|P02666|CASB_BOVIN	159	190
MHQPHQPLPPTVMFPPQSVLSLSQSKVLPVPQK	0	0	0	0	0	1	sp|P02666|CASB_BOVIN	159	191
MHQPHQPLPPTVMFPPQSVLSLSQSKVLPVPQKAVPYPQ	0	0	0	0	0	1	sp|P02666|CASB_BOVIN	159	197
MKEGIHAQQ	0	0	0	0	0	0	sp|P02662|CASA1_BOVIN	138	146
MKGKNKLVPRLLGITKDSVMRVDEKTKE	0	0	2	0	0	0	tr|F1MQI1|F1MQI1_BOVIN	322	349
MKPWIQPK	0	0	1	0	0	0	sp|P02663|CASA2_BOVIN	205	212
MKPWIQPK	0	0	0	0	0	0	sp|P02663|CASA2_BOVIN	205	212
MKPWIQPKTK	0	0	0	0	0	0	sp|P02663|CASA2_BOVIN	205	214
MLPGAR	0	0	1	0	0	0	tr|F1MKX7|F1MKX7_BOVIN	770	775
MPFPKYPVEP	0	0	1	0	0	0	sp|P02666|CASB_BOVIN	124	133
MPFPKYPVEP	0	0	0	0	0	0	sp|P02666|CASB_BOVIN	124	133
MPFPKYPVEPF	0	0	1	0	0	0	sp|P02666|CASB_BOVIN	124	134
MPFPKYPVEPF	0	0	0	0	0	0	sp|P02666|CASB_BOVIN	124	134
MPFPKYPVEPFT	0	0	0	0	0	0	sp|P02666|CASB_BOVIN	124	135
MPFPKYPVEPFT	0	0	1	0	0	0	sp|P02666|CASB_BOVIN	124	135
MPFPKYPVEPFTE	0	0	0	0	0	0	sp|P02666|CASB_BOVIN	124	136
MPFPKYPVEPFTES	0	0	0	0	0	0	sp|P02666|CASB_BOVIN	124	137
MPFPKYPVEPFTESQ	0	0	0	0	0	0	sp|P02666|CASB_BOVIN	124	138
MPFPKYPVEPFTESQSL	0	0	0	0	0	0	sp|P02666|CASB_BOVIN	124	140
MPIQAFLLYQEPVLGPVRGPFPIIV	0	0	0	0	0	0	sp|P02666|CASB_BOVIN	200	224
MVKDEDVHFSLGV	0	0	1	0	0	0	tr|E1BCS0|E1BCS0_BOVIN	7	19
MVLTGVPPF	0	0	1	0	0	0	tr|G3MWP6|G3MWP6_BOVIN	2	10
NAVPITPTLN	0	0	0	0	0	0	sp|P02663|CASA2_BOVIN	130	139
NAVPITPTLNRE	0	0	0	0	0	0	sp|P02663|CASA2_BOVIN	130	141
NAVPITPTLNREQL	0	0	0	0	0	0	sp|P02663|CASA2_BOVIN	130	143
NAVPITPTLNREQLSTSEENSK	0	1	0	0	0	0	sp|P02663|CASA2_BOVIN	130	151
NAVPITPTLNREQLSTSEENSK	0	2	0	0	0	0	sp|P02663|CASA2_BOVIN	130	151
NAVPITPTLNREQLSTSEENSK	0	0	0	0	0	0	sp|P02663|CASA2_BOVIN	130	151
NAVPITPTLNREQLSTSEENSKK	0	2	0	0	0	0	sp|P02663|CASA2_BOVIN	130	152
NAVPITPTLNREQLSTSEENSKKTVD	0	2	0	0	0	0	sp|P02663|CASA2_BOVIN	130	155
NAVPITPTLNREQLSTSEENSKKTVDMESTEVFTK	0	3	0	0	0	0	sp|P02663|CASA2_BOVIN	130	164
NEINQFYQKFPQ	0	0	0	0	0	0	sp|P02663|CASA2_BOVIN	98	109
NEINQFYQKFPQY	0	0	0	0	0	0	sp|P02663|CASA2_BOVIN	98	110
NEINQFYQKFPQYL	0	0	0	0	0	0	sp|P02663|CASA2_BOVIN	98	111
NEINQFYQKFPQYLQ	0	0	0	0	0	0	sp|P02663|CASA2_BOVIN	98	112
NEINQFYQKFPQYLQ	0	0	0	0	0	1	sp|P02663|CASA2_BOVIN	98	112
NEINQFYQKFPQYLQY	0	0	0	0	0	0	sp|P02663|CASA2_BOVIN	98	113
NEINQFYQKFPQYLQYL	0	0	0	0	0	0	sp|P02663|CASA2_BOVIN	98	114
NEINQFYQKFPQYLQYLY	0	0	0	0	0	0	sp|P02663|CASA2_BOVIN	98	115
NEINQFYQKFPQYLQYLYQGPIVLNPWDQVK	0	0	0	0	0	0	sp|P02663|CASA2_BOVIN	98	128
NEINQFYQKFPQYLQYLYQGPIVLNPWDQVK	0	0	0	0	0	1	sp|P02663|CASA2_BOVIN	98	128
NEINQFYQKFPQYLQYLYQGPIVLNPWDQVKR	0	0	0	0	0	1	sp|P02663|CASA2_BOVIN	98	129
NEINQFYQKFPQYLQYLYQGPIVLNPWDQVKR	0	0	0	0	0	0	sp|P02663|CASA2_BOVIN	98	129
NEINQFYQKFPQYLQYLYQGPIVLNPWDQVKRN	0	0	0	0	0	2	sp|P02663|CASA2_BOVIN	98	130
NEINQFYQKFPQYLQYLYQGPIVLNPWDQVKRN	0	0	0	0	0	1	sp|P02663|CASA2_BOVIN	98	130
NEINQFYQKFPQYLQYLYQGPIVLNPWDQVKRNAVPITPT	0	0	0	0	0	2	sp|P02663|CASA2_BOVIN	98	137
NEINQFYQKFPQYLQYLYQGPIVLNPWDQVKRNAVPITPT	0	0	0	0	0	1	sp|P02663|CASA2_BOVIN	98	137
NELSKDIGSESTED	0	0	0	0	0	0	sp|P02662|CASA1_BOVIN	53	66
NELSKDIGSESTEDQA	0	0	0	0	0	0	sp|P02662|CASA1_BOVIN	53	68
NELSKDIGSESTEDQAMEDIK	0	0	1	0	0	0	sp|P02662|CASA1_BOVIN	53	73
NENLLRFF	0	0	0	0	0	0	sp|P02662|CASA1_BOVIN	32	39
NENLLRFFVAPFPEVF	0	0	0	0	0	0	sp|P02662|CASA1_BOVIN	32	47
NFLKKISQ	0	0	0	0	0	0	sp|P02663|CASA2_BOVIN	177	184
NFLKKISQR	0	0	0	0	0	0	sp|P02663|CASA2_BOVIN	177	185
NFLKKISQRY	0	0	0	0	0	0	sp|P02663|CASA2_BOVIN	177	186
NFLKKISQRYQ	0	0	0	0	0	0	sp|P02663|CASA2_BOVIN	177	187
NGVLYLQAGQ	0	0	0	0	0	0	tr|E1B7Z9|E1B7Z9_BOVIN	303	312
NIPPLTQTPV	0	0	0	0	0	0	sp|P02666|CASB_BOVIN	88	97
NIPPLTQTPVVVPPF	0	0	0	0	0	0	sp|P02666|CASB_BOVIN	88	102
NIPPLTQTPVVVPPF	0	0	0	0	0	1	sp|P02666|CASB_BOVIN	88	102
NIPPLTQTPVVVPPFLQP	0	0	0	0	0	0	sp|P02666|CASB_BOVIN	88	105
NIPPLTQTPVVVPPFLQPE	0	0	0	0	0	0	sp|P02666|CASB_BOVIN	88	106
NIPPLTQTPVVVPPFLQPE	0	0	0	0	0	1	sp|P02666|CASB_BOVIN	88	106
NIPPLTQTPVVVPPFLQPEV	0	0	0	0	0	0	sp|P02666|CASB_BOVIN	88	107
NIPPLTQTPVVVPPFLQPEVM	0	0	0	0	0	0	sp|P02666|CASB_BOVIN	88	108
NIPPLTQTPVVVPPFLQPEVM	0	0	1	0	0	0	sp|P02666|CASB_BOVIN	88	108
NIPPLTQTPVVVPPFLQPEVMG	0	0	0	0	0	0	sp|P02666|CASB_BOVIN	88	109
NIPPLTQTPVVVPPFLQPEVMG	0	0	1	0	0	0	sp|P02666|CASB_BOVIN	88	109
NIPPLTQTPVVVPPFLQPEVMGV	0	0	0	0	0	0	sp|P02666|CASB_BOVIN	88	110
NIPPLTQTPVVVPPFLQPEVMGV	0	0	1	0	0	0	sp|P02666|CASB_BOVIN	88	110
NIPPLTQTPVVVPPFLQPEVMGV	0	0	0	0	0	1	sp|P02666|CASB_BOVIN	88	110
NIPPLTQTPVVVPPFLQPEVMGVS	0	0	0	0	0	0	sp|P02666|CASB_BOVIN	88	111
NIPPLTQTPVVVPPFLQPEVMGVSK	0	0	0	0	0	0	sp|P02666|CASB_BOVIN	88	112
NIPPLTQTPVVVPPFLQPEVMGVSK	0	0	0	0	0	1	sp|P02666|CASB_BOVIN	88	112
NIPPLTQTPVVVPPFLQPEVMGVSK	0	0	0	0	0	2	sp|P02666|CASB_BOVIN	88	112
NIPPLTQTPVVVPPFLQPEVMGVSKVK	0	0	1	0	0	0	sp|P02666|CASB_BOVIN	88	114
NIPPLTQTPVVVPPFLQPEVMGVSKVK	0	0	0	0	0	0	sp|P02666|CASB_BOVIN	88	114
NIPPLTQTPVVVPPFLQPEVMGVSKVK	0	0	0	0	0	1	sp|P02666|CASB_BOVIN	88	114
NIPPLTQTPVVVPPFLQPEVMGVSKVKEA	0	0	0	0	0	0	sp|P02666|CASB_BOVIN	88	116
NIPPLTQTPVVVPPFLQPEVMGVSKVKEA	0	0	0	0	0	1	sp|P02666|CASB_BOVIN	88	116
NIPPLTQTPVVVPPFLQPEVMGVSKVKEA	0	0	0	0	0	2	sp|P02666|CASB_BOVIN	88	116
NIPPLTQTPVVVPPFLQPEVMGVSKVKEAMAPK	0	0	1	0	0	0	sp|P02666|CASB_BOVIN	88	120
NIPPLTQTPVVVPPFLQPEVMGVSKVKEAMAPK	0	0	0	0	0	1	sp|P02666|CASB_BOVIN	88	120
NIPPLTQTPVVVPPFLQPEVMGVSKVKEAMAPK	0	0	0	0	0	0	sp|P02666|CASB_BOVIN	88	120
NIPPLTQTPVVVPPFLQPEVMGVSKVKEAMAPK	0	0	0	0	0	2	sp|P02666|CASB_BOVIN	88	120
NIPPLTQTPVVVPPFLQPEVMGVSKVKEAMAPKHK	0	0	0	0	0	1	sp|P02666|CASB_BOVIN	88	122
NIPPLTQTPVVVPPFLQPEVMGVSKVKEAMAPKHK	0	0	0	0	0	0	sp|P02666|CASB_BOVIN	88	122
NKKIEKFQSEE	0	1	0	0	0	0	sp|P02666|CASB_BOVIN	42	52
NKKIEKFQSEEQQ	0	1	0	0	0	0	sp|P02666|CASB_BOVIN	42	54
NKKIEKFQSEEQQQ	0	1	0	0	0	0	sp|P02666|CASB_BOVIN	42	55
NKKIEKFQSEEQQQTE	0	1	0	0	0	0	sp|P02666|CASB_BOVIN	42	57
NKKIEKFQSEEQQQTED	0	1	0	0	0	0	sp|P02666|CASB_BOVIN	42	58
NKKIEKFQSEEQQQTED	0	0	0	0	0	0	sp|P02666|CASB_BOVIN	42	58
NKKIEKFQSEEQQQTEDEL	0	1	0	0	0	0	sp|P02666|CASB_BOVIN	42	60
NKKIEKFQSEEQQQTEDELQ	0	1	0	0	0	0	sp|P02666|CASB_BOVIN	42	61
NKKIEKFQSEEQQQTEDELQDK	0	1	0	0	0	0	sp|P02666|CASB_BOVIN	42	63
NKKIEKFQSEEQQQTEDELQDKIHPF	0	1	0	0	0	0	sp|P02666|CASB_BOVIN	42	67
NKKIEKFQSEEQQQTEDELQDKIHPF	0	2	0	0	0	0	sp|P02666|CASB_BOVIN	42	67
NKKIEKFQSEEQQQTEDELQDKIHPFA	0	1	0	0	0	0	sp|P02666|CASB_BOVIN	42	68
NKKIEKFQSEEQQQTEDELQDKIHPFAQT	0	1	0	0	0	0	sp|P02666|CASB_BOVIN	42	70
NKKIEKFQSEEQQQTEDELQDKIHPFAQTQ	0	1	0	0	0	0	sp|P02666|CASB_BOVIN	42	71
NKPEDETHL	0	0	0	0	0	0	sp|P80195|GLCM1_BOVIN	21	29
NKPEDETHLE	0	0	0	0	0	0	sp|P80195|GLCM1_BOVIN	21	30
NLHLPLPLLQ	0	0	0	0	0	0	sp|P02666|CASB_BOVIN	147	156
NLHLPLPLLQ	0	0	0	0	0	1	sp|P02666|CASB_BOVIN	147	156
NLHLPLPLLQS	0	0	0	0	0	0	sp|P02666|CASB_BOVIN	147	157
NLHLPLPLLQSW	0	0	0	0	0	0	sp|P02666|CASB_BOVIN	147	158
NLHLPLPLLQSWMHQPHQPLPPT	0	0	0	0	0	0	sp|P02666|CASB_BOVIN	147	169
NLHLPLPLLQSWMHQPHQPLPPT	0	0	0	0	0	1	sp|P02666|CASB_BOVIN	147	169
NLHLPLPLLQSWMHQPHQPLPPTVMFPPQ	0	0	0	0	0	1	sp|P02666|CASB_BOVIN	147	175
NLHLPLPLLQSWMHQPHQPLPPTVMFPPQSVL	0	0	0	0	0	1	sp|P02666|CASB_BOVIN	147	178
NMAINPSKE	0	0	1	0	0	0	sp|P02663|CASA2_BOVIN	40	48
NMAINPSKE	0	0	0	0	0	0	sp|P02663|CASA2_BOVIN	40	48
NMAINPSKE	0	0	0	0	0	1	sp|P02663|CASA2_BOVIN	40	48
NMAINPSKENL	0	0	0	0	0	0	sp|P02663|CASA2_BOVIN	40	50
NMAINPSKENLCSTFCKEVVR	0	0	0	0	0	1	sp|P02663|CASA2_BOVIN	40	60
NMAINPSKENLCSTFCKEVVR	0	1	0	0	0	0	sp|P02663|CASA2_BOVIN	40	60
NMAINPSKENLCSTFCKEVVR	0	0	0	0	0	0	sp|P02663|CASA2_BOVIN	40	60
NMAINPSKENLCSTFCKEVVRNANEEE	0	0	0	0	0	1	sp|P02663|CASA2_BOVIN	40	66
NNQFLPYPY	0	0	0	0	0	0	sp|P02668|CASK_BOVIN	73	81
NNQFLPYPY	0	0	0	0	0	1	sp|P02668|CASK_BOVIN	73	81
NNQFLPYPYYAKPA	0	0	0	0	0	0	sp|P02668|CASK_BOVIN	73	86
NPIGSENSEKT	0	0	0	0	0	0	sp|P02662|CASA1_BOVIN	199	209
NPIGSENSEKT	0	0	0	0	0	1	sp|P02662|CASA1_BOVIN	199	209
NPIGSENSEKTTMP	0	0	0	0	0	1	sp|P02662|CASA1_BOVIN	199	212
NPIGSENSEKTTMP	0	0	1	0	0	0	sp|P02662|CASA1_BOVIN	199	212
NPWDQVK	0	0	0	0	0	0	sp|P02663|CASA2_BOVIN	122	128
NPWDQVKR	0	0	0	0	0	0	sp|P02663|CASA2_BOVIN	122	129
NPWDQVKRN	0	0	0	0	0	0	sp|P02663|CASA2_BOVIN	122	130
NQFLPYPYYAKPA	0	0	0	0	0	0	sp|P02668|CASK_BOVIN	74	86
NQFLPYPYYAKPAAV	0	0	0	0	0	0	sp|P02668|CASK_BOVIN	74	88
NREQLSTSEEN	0	0	0	0	0	0	sp|P02663|CASA2_BOVIN	139	149
NREQLSTSEENSK	0	2	0	0	0	0	sp|P02663|CASA2_BOVIN	139	151
NREQLSTSEENSK	0	1	0	0	0	0	sp|P02663|CASA2_BOVIN	139	151
NREQLSTSEENSK	0	0	0	0	0	0	sp|P02663|CASA2_BOVIN	139	151
NREQLSTSEENSKK	0	0	0	0	0	0	sp|P02663|CASA2_BOVIN	139	152
NREQLSTSEENSKK	0	1	0	0	0	0	sp|P02663|CASA2_BOVIN	139	152
NREQLSTSEENSKK	0	2	0	0	0	0	sp|P02663|CASA2_BOVIN	139	152
NREQLSTSEENSKKT	0	2	0	0	0	0	sp|P02663|CASA2_BOVIN	139	153
NREQLSTSEENSKKTVD	0	1	0	0	0	0	sp|P02663|CASA2_BOVIN	139	155
NREQLSTSEENSKKTVD	0	2	0	0	0	0	sp|P02663|CASA2_BOVIN	139	155
NREQLSTSEENSKKTVDMESTEVFTK	0	3	0	0	0	0	sp|P02663|CASA2_BOVIN	139	164
NREQLSTSEENSKKTVDMESTEVFTKK	0	2	0	0	0	0	sp|P02663|CASA2_BOVIN	139	165
NREQLSTSEENSKKTVDMESTEVFTKK	0	3	0	0	0	0	sp|P02663|CASA2_BOVIN	139	165
NREQLSTSEENSKKTVDMESTEVFTKKT	0	3	0	0	0	0	sp|P02663|CASA2_BOVIN	139	166
NREQLSTSEENSKKTVDMESTEVFTKKTK	0	3	0	0	0	0	sp|P02663|CASA2_BOVIN	139	167
NREQLSTSEENSKKTVDMESTEVFTKKTK	0	2	0	0	0	0	sp|P02663|CASA2_BOVIN	139	167
NREQLSTSEENSKKTVDMESTEVFTKKTKLTEEEKNRLN	0	3	0	0	0	0	sp|P02663|CASA2_BOVIN	139	177
NRLNFLKK	0	0	0	0	0	0	sp|P02663|CASA2_BOVIN	174	181
NSAEERLHSM	0	1	0	0	0	0	sp|P02662|CASA1_BOVIN	129	138
NSEKTTMPL	0	0	0	0	0	0	sp|P02662|CASA1_BOVIN	205	213
NSEKTTMPLW	0	0	0	0	0	0	sp|P02662|CASA1_BOVIN	205	214
NVPGEIVESL	0	0	0	0	0	0	sp|P02666|CASB_BOVIN	22	31
NVPGEIVESLSSSEESIT	0	2	0	0	0	0	sp|P02666|CASB_BOVIN	22	39
NVPGEIVESLSSSEESIT	0	1	0	0	0	0	sp|P02666|CASB_BOVIN	22	39
NVPGEIVESLSSSEESIT	0	3	0	0	0	0	sp|P02666|CASB_BOVIN	22	39
NVPGEIVESLSSSEESIT	0	0	0	0	0	0	sp|P02666|CASB_BOVIN	22	39
NVPGEIVESLSSSEESITR	0	1	0	0	0	0	sp|P02666|CASB_BOVIN	22	40
NVPGEIVESLSSSEESITRIN	0	3	0	0	0	0	sp|P02666|CASB_BOVIN	22	42
NVPGEIVESLSSSEESITRINK	0	3	0	0	0	0	sp|P02666|CASB_BOVIN	22	43
NVQTEIVNK	0	0	0	0	0	0	tr|F6R3I5|F6R3I5_BOVIN	36	44
NYYQQKPV	0	0	0	0	0	0	sp|P02668|CASK_BOVIN	62	69
NYYQQKPVA	0	0	0	0	0	0	sp|P02668|CASK_BOVIN	62	70
NYYQQKPVAL	0	0	0	0	0	0	sp|P02668|CASK_BOVIN	62	71
NYYQQKPVALIN	0	0	0	0	0	0	sp|P02668|CASK_BOVIN	62	73
PEVMGVSKVKEAMAPK	0	0	0	0	0	0	sp|P02666|CASB_BOVIN	105	120
PFAQTQSLVYPFPGPIPNSLPQ	0	2	0	0	0	0	sp|P02666|CASB_BOVIN	66	87
PFLQPEVM	0	0	0	0	0	0	sp|P02666|CASB_BOVIN	101	108
PFPEVFGKEKVN	0	0	0	0	0	0	sp|P02662|CASA1_BOVIN	42	53
PFPGPIPNSLPQ	0	0	0	0	0	0	sp|P02666|CASB_BOVIN	76	87
PFPGPIPNSLPQNIPPLTQTPVVVPPFLQPEVM	0	0	0	0	0	2	sp|P02666|CASB_BOVIN	76	108
PFPGPIPNSLPQNIPPLTQTPVVVPPFLQPEVM	0	0	0	0	0	1	sp|P02666|CASB_BOVIN	76	108
PFPKYPVEP	0	0	0	0	0	0	sp|P02666|CASB_BOVIN	125	133
PFPKYPVEPF	0	0	0	0	0	0	sp|P02666|CASB_BOVIN	125	134
PFPKYPVEPFT	0	0	0	0	0	0	sp|P02666|CASB_BOVIN	125	135
PFPKYPVEPFTESQ	0	0	0	0	0	0	sp|P02666|CASB_BOVIN	125	138
PFPKYPVEPFTESQSL	0	0	0	0	0	0	sp|P02666|CASB_BOVIN	125	140
PFTESQSLTLTDVENLHLPLPLLQS	0	0	0	0	0	0	sp|P02666|CASB_BOVIN	133	157
PGEIVESLSSSEESITRINKKIEKFQSEEQQQTEDELQ	0	3	0	0	0	0	sp|P02666|CASB_BOVIN	24	61
PGEPVVEVLSRPRP	0	0	0	0	0	0	sp|Q1JQD7|MOCS1_BOVIN	32	45
PGKSGAAAAAAAAAAAAAAAAAA	0	0	0	0	0	0	tr|E1BME7|E1BME7_BOVIN	237	259
PGPIPNSLP	0	0	0	0	0	1	sp|P02666|CASB_BOVIN	78	86
PGPIPNSLPQ	0	0	0	0	0	1	sp|P02666|CASB_BOVIN	78	87
PGPIPNSLPQ	0	0	0	0	0	0	sp|P02666|CASB_BOVIN	78	87
PHPELLLRGGAAARRLP	0	0	0	0	0	0	tr|G3MX55|G3MX55_BOVIN	210	226
PHQPLPPT	0	0	0	0	0	0	sp|P02666|CASB_BOVIN	162	169
PHQPLPPTVM	0	0	1	0	0	0	sp|P02666|CASB_BOVIN	162	171
PHQPLPPTVMFPPQ	0	0	1	0	0	0	sp|P02666|CASB_BOVIN	162	175
PHQPLPPTVMFPPQ	0	0	0	0	0	0	sp|P02666|CASB_BOVIN	162	175
PIGSENSEKTTMPLW	0	0	0	0	0	0	sp|P02662|CASA1_BOVIN	200	214
PIVLNPWDQVK	0	0	0	0	0	0	sp|P02663|CASA2_BOVIN	118	128
PIVLNPWDQVKR	0	0	0	0	0	0	sp|P02663|CASA2_BOVIN	118	129
PIVLNPWDQVKRN	0	0	0	0	0	0	sp|P02663|CASA2_BOVIN	118	130
PKHPIKHQGLPQE	0	0	0	0	0	0	sp|P02662|CASA1_BOVIN	17	29
PKYPVEPF	0	0	0	0	0	0	sp|P02666|CASB_BOVIN	127	134
PKYPVEPFT	0	0	0	0	0	0	sp|P02666|CASB_BOVIN	127	135
PKYPVEPFTES	0	0	0	0	0	0	sp|P02666|CASB_BOVIN	127	137
PKYPVEPFTESQ	0	0	0	0	0	0	sp|P02666|CASB_BOVIN	127	138
PLGTQYTDAPS	0	0	0	0	0	0	sp|P02662|CASA1_BOVIN	183	193
PLGTQYTDAPSFSDIPNPIGSE	0	1	0	0	0	0	sp|P02662|CASA1_BOVIN	183	204
PLGTQYTDAPSFSDIPNPIGSENSEKTTMPL	0	0	0	0	0	1	sp|P02662|CASA1_BOVIN	183	213
PLGTQYTDAPSFSDIPNPIGSENSEKTTMPLW	0	0	0	0	0	1	sp|P02662|CASA1_BOVIN	183	214
PLPPTVMFPPQ	0	0	1	0	0	0	sp|P02666|CASB_BOVIN	165	175
PLPPTVMFPPQ	0	0	0	0	0	0	sp|P02666|CASB_BOVIN	165	175
PMIGVNQ	0	0	0	0	0	0	sp|P02662|CASA1_BOVIN	149	155
PMIGVNQEL	0	0	1	0	0	0	sp|P02662|CASA1_BOVIN	149	157
PNPIGSEN	0	0	0	0	0	0	sp|P02662|CASA1_BOVIN	198	205
PNPIGSENSEK	0	0	0	0	0	1	sp|P02662|CASA1_BOVIN	198	208
PNPIGSENSEKT	0	0	0	0	0	0	sp|P02662|CASA1_BOVIN	198	209
PNPIGSENSEKT	0	0	0	0	0	1	sp|P02662|CASA1_BOVIN	198	209
PNPIGSENSEKTT	0	0	0	0	0	1	sp|P02662|CASA1_BOVIN	198	210
PNPIGSENSEKTTMPLW	0	0	1	0	0	0	sp|P02662|CASA1_BOVIN	198	214
PNSAEERLH	0	1	0	0	0	0	sp|P02662|CASA1_BOVIN	128	136
PPFLQPEVM	0	0	0	0	0	0	sp|P02666|CASB_BOVIN	100	108
PPFLQPEVM	0	0	1	0	0	0	sp|P02666|CASB_BOVIN	100	108
PPFLQPEVMGV	0	0	0	0	0	0	sp|P02666|CASB_BOVIN	100	110
PPFLQPEVMGVSKVKEAMA	0	0	1	0	0	0	sp|P02666|CASB_BOVIN	100	118
PPFLQPEVMGVSKVKEAMA	0	1	0	0	0	0	sp|P02666|CASB_BOVIN	100	118
PPFLQPEVMGVSKVKEAMAPKHKEMPFPKYP	0	1	0	0	0	0	sp|P02666|CASB_BOVIN	100	130
PPFLQPEVMGVSKVKEAMAPKHKEMPFPKYPVEP	0	0	1	0	0	0	sp|P02666|CASB_BOVIN	100	133
PPFLQPEVMGVSKVKEAMAPKHKEMPFPKYPVEPF	0	0	0	0	0	0	sp|P02666|CASB_BOVIN	100	134
[truncated: 1,522 more rows]

## Sheet: Table S2 Taleggio interior
Table S2. Peptide sequences identified in the interior of Taleggio cheese.
Peptide sequence	Acetylations	Phosphorylations	Oxidations	Dehydrations	Ammonia loss	Deamidation	Protein	Start position	End position
AAAAKAAKIGAGGVGALG	0	0	0	0	0	0	sp|P04985|ELN_BOVIN	441	458
AAAKAAKAASTSTPTKGN	0	0	0	0	0	0	sp|E1BB52|CDK13_BOVIN	483	500
AAKAAAKAAQFGLALLAFAGLGP	0	0	0	0	0	1	sp|P04985-6|ELN_BOVIN	453	475
AAKAAAKAAQFGLGGVGGLG	0	0	0	0	0	1	sp|P04985|ELN_BOVIN	643	662
AAKAAAKAAQFGLGGVGGLG	0	0	0	0	0	0	sp|P04985|ELN_BOVIN	643	662
AAKAAAKAAQFGLGPGVGVAP	0	0	0	0	0	0	sp|P04985|ELN_BOVIN	487	507
AAKAAAKAAQFGVSPAAA	0	0	0	0	0	1	sp|P04985-7|ELN_BOVIN	609	626
AFLLYQEPVL	0	0	0	0	0	0	sp|P02666|CASB_BOVIN	204	213
AFLLYQEPVLGPVRGP	0	0	0	0	0	0	sp|P02666|CASB_BOVIN	204	219
AFLLYQEPVLGPVRGPFPIIV	0	0	0	0	0	0	sp|P02666|CASB_BOVIN	204	224
AINPSKENL	0	1	0	0	0	0	sp|P02663|CASA2_BOVIN	42	50
AINPSKENL	0	0	0	0	0	0	sp|P02663|CASA2_BOVIN	42	50
AINPSKENLC	0	0	0	0	0	0	sp|P02663|CASA2_BOVIN	42	51
ALNEINQFY	0	0	0	0	0	0	sp|P02663|CASA2_BOVIN	96	104
ALNEINQFYQ	0	0	0	0	0	0	sp|P02663|CASA2_BOVIN	96	105
ALNEINQFYQKFPQ	0	0	0	0	0	0	sp|P02663|CASA2_BOVIN	96	109
ALNEINQFYQKFPQY	0	0	0	0	0	0	sp|P02663|CASA2_BOVIN	96	110
ALNEINQFYQKFPQYL	0	0	0	0	0	0	sp|P02663|CASA2_BOVIN	96	111
ALNEINQFYQKFPQYLQ	0	0	0	0	0	0	sp|P02663|CASA2_BOVIN	96	112
ALNEINQFYQKFPQYLQY	0	0	0	0	0	0	sp|P02663|CASA2_BOVIN	96	113
ALNEINQFYQKFPQYLQYL	0	0	0	0	0	0	sp|P02663|CASA2_BOVIN	96	114
ALNEINQFYQKFPQYLQYLY	0	0	0	0	0	1	sp|P02663|CASA2_BOVIN	96	115
ALNEINQFYQKFPQYLQYLY	0	0	0	0	0	0	sp|P02663|CASA2_BOVIN	96	115
ALNEINQFYQKFPQYLQYLYQGPIVLNPWDQVKR	0	0	0	0	0	2	sp|P02663|CASA2_BOVIN	96	129
ALNEINQFYQKFPQYLQYLYQGPIVLNPWDQVKR	0	0	0	0	0	1	sp|P02663|CASA2_BOVIN	96	129
ALNEINQFYQKFPQYLQYLYQGPIVLNPWDQVKRN	0	0	0	0	0	0	sp|P02663|CASA2_BOVIN	96	130
ALNEINQFYQKFPQYLQYLYQGPIVLNPWDQVKRN	0	0	0	0	0	1	sp|P02663|CASA2_BOVIN	96	130
ALPQYLK	0	0	0	0	0	0	sp|P02663|CASA2_BOVIN	190	196
ALPQYLKT	0	0	0	0	0	0	sp|P02663|CASA2_BOVIN	190	197
ALPQYLKTV	0	0	0	0	0	0	sp|P02663|CASA2_BOVIN	190	198
ALPQYLKTVY	0	0	0	0	0	0	sp|P02663|CASA2_BOVIN	190	199
ALPQYLKTVYQH	0	0	0	0	0	0	sp|P02663|CASA2_BOVIN	190	201
ALPQYLKTVYQHQ	0	0	0	0	0	0	sp|P02663|CASA2_BOVIN	190	202
ALPQYLKTVYQHQK	0	0	0	0	0	0	sp|P02663|CASA2_BOVIN	190	203
ALPQYLKTVYQHQKA	0	0	0	0	0	0	sp|P02663|CASA2_BOVIN	190	204
ALPQYLKTVYQHQKA	0	0	0	0	0	1	sp|P02663|CASA2_BOVIN	190	204
ALPQYLKTVYQHQKAMKPWIQPK	0	0	0	0	0	1	sp|P02663|CASA2_BOVIN	190	212
AMAPKHKEMPFPKYPVEPF	0	0	0	0	0	0	sp|P02666|CASB_BOVIN	116	134
AMAPKHKEMPFPKYPVEPF	0	0	1	0	0	0	sp|P02666|CASB_BOVIN	116	134
AMAPKHKEMPFPKYPVEPFTESQ	0	0	0	0	0	0	sp|P02666|CASB_BOVIN	116	138
AMEDIKQ	0	0	0	0	0	0	sp|P02662|CASA1_BOVIN	68	74
AMEDIKQM	0	0	1	0	0	0	sp|P02662|CASA1_BOVIN	68	75
AMEDIKQM	0	0	0	0	0	0	sp|P02662|CASA1_BOVIN	68	75
AMEDIKQME	0	0	0	0	0	0	sp|P02662|CASA1_BOVIN	68	76
AMKPWIQPK	0	0	1	0	0	0	sp|P02663|CASA2_BOVIN	204	212
AMKPWIQPK	0	0	0	0	0	0	sp|P02663|CASA2_BOVIN	204	212
AMKPWIQPKT	0	0	0	0	0	0	sp|P02663|CASA2_BOVIN	204	213
AMKPWIQPKTK	0	0	0	0	0	0	sp|P02663|CASA2_BOVIN	204	214
APFPEVF	0	0	0	0	0	0	sp|P02662|CASA1_BOVIN	41	47
APFPEVFGK	0	0	0	0	0	0	sp|P02662|CASA1_BOVIN	41	49
APFPEVFGKEK	0	0	0	0	0	0	sp|P02662|CASA1_BOVIN	41	51
APFPEVFGKEKVN	0	0	0	0	0	0	sp|P02662|CASA1_BOVIN	41	53
APKHKEMPFPK	0	0	0	0	0	0	sp|P02666|CASB_BOVIN	118	128
APKHKEMPFPKYP	0	0	0	0	0	0	sp|P02666|CASB_BOVIN	118	130
APKHKEMPFPKYPV	0	0	0	0	0	0	sp|P02666|CASB_BOVIN	118	131
APKHKEMPFPKYPVEP	0	0	0	0	0	0	sp|P02666|CASB_BOVIN	118	133
APKHKEMPFPKYPVEPF	0	0	1	0	0	0	sp|P02666|CASB_BOVIN	118	134
APKHKEMPFPKYPVEPF	0	0	0	0	0	0	sp|P02666|CASB_BOVIN	118	134
APKHKEMPFPKYPVEPFT	0	0	0	0	0	0	sp|P02666|CASB_BOVIN	118	135
APKHKEMPFPKYPVEPFTE	0	0	0	0	0	0	sp|P02666|CASB_BOVIN	118	136
APKHKEMPFPKYPVEPFTESQ	0	0	0	0	0	0	sp|P02666|CASB_BOVIN	118	138
APKHKEMPFPKYPVEPFTESQSLTLTDVENLHLPLP	0	0	0	0	0	1	sp|P02666|CASB_BOVIN	118	153
APKHKEMPFPKYPVEPFTESQSLTLTDVENLHLPLPLLQS	0	0	0	0	0	1	sp|P02666|CASB_BOVIN	118	157
APSFSDIPNPIGSE	0	0	0	0	0	0	sp|P02662|CASA1_BOVIN	191	204
APSFSDIPNPIGSENSEK	0	0	0	0	0	0	sp|P02662|CASA1_BOVIN	191	208
APSFSDIPNPIGSENSEKTTMPLW	0	0	1	0	0	0	sp|P02662|CASA1_BOVIN	191	214
APSFSDIPNPIGSENSEKTTMPLW	0	0	0	0	0	0	sp|P02662|CASA1_BOVIN	191	214
APSFSDIPNPIGSENSEKTTMPLW	0	0	0	0	0	1	sp|P02662|CASA1_BOVIN	191	214
AQQKEPMIG	0	0	0	0	0	0	sp|P02662|CASA1_BOVIN	144	152
AQQKEPMIGV	0	0	0	0	0	0	sp|P02662|CASA1_BOVIN	144	153
AQQKEPMIGVN	0	0	1	0	0	0	sp|P02662|CASA1_BOVIN	144	154
AQQKEPMIGVN	0	0	0	0	0	0	sp|P02662|CASA1_BOVIN	144	154
AQQKEPMIGVNQEL	0	0	0	0	0	0	sp|P02662|CASA1_BOVIN	144	157
AQQKEPMIGVNQELA	0	0	0	0	0	0	sp|P02662|CASA1_BOVIN	144	158
AQQKEPMIGVNQELAY	0	0	0	0	0	0	sp|P02662|CASA1_BOVIN	144	159
AQQKEPMIGVNQELAYFYPE	0	0	0	0	0	0	sp|P02662|CASA1_BOVIN	144	163
AQQKEPMIGVNQELAYFYPELFR	0	0	0	0	0	0	sp|P02662|CASA1_BOVIN	144	166
AQQKEPMIGVNQELAYFYPELFRQ	0	0	0	0	0	0	sp|P02662|CASA1_BOVIN	144	167
AQQKEPMIGVNQELAYFYPELFRQF	0	0	0	0	0	0	sp|P02662|CASA1_BOVIN	144	168
AQQKEPMIGVNQELAYFYPELFRQFYQL	0	0	0	0	0	0	sp|P02662|CASA1_BOVIN	144	171
AQQKEPMIGVNQELAYFYPELFRQFYQLDAYPS	0	0	0	0	0	1	sp|P02662|CASA1_BOVIN	144	176
AQTQSLVYPFPGPIPN	0	0	0	0	0	0	sp|P02666|CASB_BOVIN	68	83
AQTQSLVYPFPGPIPNSLPQ	0	0	0	0	0	0	sp|P02666|CASB_BOVIN	68	87
AQTQSLVYPFPGPIPNSLPQNIPPL	0	0	0	0	0	0	sp|P02666|CASB_BOVIN	68	92
AQTQSLVYPFPGPIPNSLPQNIPPLTQTPVVVPPF	0	0	0	0	0	1	sp|P02666|CASB_BOVIN	68	102
AQTQSLVYPFPGPIPNSLPQNIPPLTQTPVVVPPFLQPEVM	0	0	0	0	0	0	sp|P02666|CASB_BOVIN	68	108
AQTQSLVYPFPGPIPNSLPQNIPPLTQTPVVVPPFLQPEVM	0	0	0	0	0	2	sp|P02666|CASB_BOVIN	68	108
AQTQSLVYPFPGPIPNSLPQNIPPLTQTPVVVPPFLQPEVM	0	0	0	0	0	1	sp|P02666|CASB_BOVIN	68	108
AQTQSLVYPFPGPIPNSLPQNIPPLTQTPVVVPPFLQPEVMGV	0	0	0	0	0	2	sp|P02666|CASB_BOVIN	68	110
AQTQSLVYPFPGPIPNSLPQNIPPLTQTPVVVPPFLQPEVMGVS	0	0	0	0	0	0	sp|P02666|CASB_BOVIN	68	111
AQTQSLVYPFPGPIPNSLPQNIPPLTQTPVVVPPFLQPEVMGVS	0	0	0	0	0	2	sp|P02666|CASB_BOVIN	68	111
AQTQSLVYPFPGPIPNSLPQNIPPLTQTPVVVPPFLQPEVMGVSK	0	0	0	0	0	2	sp|P02666|CASB_BOVIN	68	112
ARHPHPHLSF	0	0	0	0	0	0	sp|P02668|CASK_BOVIN	117	126
ASLAATSLAILNKPEDETHLEAQPTDASAQ	0	2	0	0	0	0	sp|P80195|GLCM1_BOVIN	10	39
AVDVTLDPDTAHPH	0	0	0	0	0	0	sp|P18892|BT1A1_BOVIN	302	315
AVPITPTLNR	0	0	0	0	0	0	sp|P02663|CASA2_BOVIN	131	140
AVPITPTLNRE	0	0	0	0	0	0	sp|P02663|CASA2_BOVIN	131	141
AVPITPTLNREQ	0	0	0	0	0	0	sp|P02663|CASA2_BOVIN	131	142
AVPITPTLNREQL	0	0	0	0	0	0	sp|P02663|CASA2_BOVIN	131	143
AVPITPTLNREQLSTSEENSK	0	0	0	0	0	0	sp|P02663|CASA2_BOVIN	131	151
AVPITPTLNREQLSTSEENSK	0	2	0	0	0	0	sp|P02663|CASA2_BOVIN	131	151
AVPITPTLNREQLSTSEENSKK	0	2	0	0	0	0	sp|P02663|CASA2_BOVIN	131	152
AVPITPTLNREQLSTSEENSKKTVDMESTEVFTK	0	3	0	0	0	0	sp|P02663|CASA2_BOVIN	131	164
AVPYPQRDMP	0	0	0	0	0	0	sp|P02666|CASB_BOVIN	192	201
AVPYPQRDMPI	0	0	0	0	0	0	sp|P02666|CASB_BOVIN	192	202
AVPYPQRDMPIQ	0	0	1	0	0	0	sp|P02666|CASB_BOVIN	192	203
AVPYPQRDMPIQ	0	0	0	0	0	0	sp|P02666|CASB_BOVIN	192	203
AVPYPQRDMPIQA	0	0	1	0	0	0	sp|P02666|CASB_BOVIN	192	204
AVPYPQRDMPIQA	0	0	0	0	0	0	sp|P02666|CASB_BOVIN	192	204
AVPYPQRDMPIQA	0	0	0	0	0	1	sp|P02666|CASB_BOVIN	192	204
AVPYPQRDMPIQAF	0	0	1	0	0	0	sp|P02666|CASB_BOVIN	192	205
AVPYPQRDMPIQAF	0	0	0	0	0	0	sp|P02666|CASB_BOVIN	192	205
AVPYPQRDMPIQAF	0	0	0	0	0	1	sp|P02666|CASB_BOVIN	192	205
AVPYPQRDMPIQAFL	0	0	0	0	0	0	sp|P02666|CASB_BOVIN	192	206
AVPYPQRDMPIQAFLL	0	0	0	0	0	0	sp|P02666|CASB_BOVIN	192	207
AVPYPQRDMPIQAFLLY	0	0	0	0	0	0	sp|P02666|CASB_BOVIN	192	208
AVPYPQRDMPIQAFLLYQEPVLGPVRGPFP	0	0	0	0	0	1	sp|P02666|CASB_BOVIN	192	221
AVPYPQRDMPIQAFLLYQEPVLGPVRGPFP	0	0	0	0	0	0	sp|P02666|CASB_BOVIN	192	221
AVPYPQRDMPIQAFLLYQEPVLGPVRGPFPIIV	0	0	1	0	0	0	sp|P02666|CASB_BOVIN	192	224
AVPYPQRDMPIQAFLLYQEPVLGPVRGPFPIIV	0	0	0	0	0	0	sp|P02666|CASB_BOVIN	192	224
AVPYPQRDMPIQAFLLYQEPVLGPVRGPFPIIV	0	0	0	0	0	1	sp|P02666|CASB_BOVIN	192	224
AVRSPAQILQWQVLSNTVPA	0	0	0	0	0	1	sp|P02668|CASK_BOVIN	87	106
AVRSPAQILQWQVLSNTVPA	0	0	0	0	0	0	sp|P02668|CASK_BOVIN	87	106
AVRSPAQILQWQVLSNTVPA	0	0	0	0	0	2	sp|P02668|CASK_BOVIN	87	106
AYFYPELFR	0	0	0	0	0	0	sp|P02662|CASA1_BOVIN	158	166
AYFYPELFRQ	0	0	0	0	0	0	sp|P02662|CASA1_BOVIN	158	167
DAPSFSDIPNPIGSENSEKTTMPLW	0	0	0	0	0	0	sp|P02662|CASA1_BOVIN	190	214
DAYPSGAWYYVPLGTQYTDAPSFSDIPNPIGSENSEKTTMPLW	0	0	0	0	0	0	sp|P02662|CASA1_BOVIN	172	214
DAYPSGAWYYVPLGTQYTDAPSFSDIPNPIGSENSEKTTMPLW	0	0	0	0	0	1	sp|P02662|CASA1_BOVIN	172	214
DELQDKIHPF	0	0	0	0	0	0	sp|P02666|CASB_BOVIN	58	67
DELQDKIHPFAQTQ	0	0	0	0	0	0	sp|P02666|CASB_BOVIN	58	71
DEQEDGIPGLLGGSES	0	0	0	0	0	0	tr|F1MX46|F1MX46_BOVIN	40	55
DEQEEEEAANQKLA	0	0	0	0	0	0	tr|F1N1E0|F1N1E0_BOVIN	727	740
DEQQESVRAAPERS	0	0	0	0	0	0	tr|E1BCR2|E1BCR2_BOVIN	814	827
DEQQESVRAAPERS	0	0	0	0	0	1	tr|E1BCR2|E1BCR2_BOVIN	814	827
DIPNPIGSE	0	0	0	0	0	0	sp|P02662|CASA1_BOVIN	196	204
DIPNPIGSENSEK	0	0	0	0	0	0	sp|P02662|CASA1_BOVIN	196	208
DIPNPIGSENSEKT	0	0	0	0	0	0	sp|P02662|CASA1_BOVIN	196	209
DKIHPFAQ	0	0	0	0	0	0	sp|P02666|CASB_BOVIN	62	69
DKIHPFAQTQ	0	0	0	0	0	0	sp|P02666|CASB_BOVIN	62	71
DKIHPFAQTQ	0	0	0	0	0	1	sp|P02666|CASB_BOVIN	62	71
DKIHPFAQTQS	0	0	0	0	0	0	sp|P02666|CASB_BOVIN	62	72
DKIHPFAQTQSL	0	0	0	0	0	0	sp|P02666|CASB_BOVIN	62	73
DKPWLQKP	0	0	0	0	0	0	tr|E1BFA0|E1BFA0_BOVIN	19	26
DKTEIPTIN	0	0	0	0	0	0	sp|P02668|CASK_BOVIN	136	144
DLDHKSEEDKHLK	0	1	0	0	0	0	sp|P31098|OSTK_BOVIN	250	262
DLISKEQIVIR	0	1	0	0	0	0	sp|P80195|GLCM1_BOVIN	61	71
DMESTEVFTKK	0	1	0	0	0	0	sp|P02663|CASA2_BOVIN	155	165
DMESTEVFTKKTK	0	1	0	0	0	0	sp|P02663|CASA2_BOVIN	155	167
DMESTEVFTKKTKLTEEEKNRLNFL	0	0	1	0	0	0	sp|P02663|CASA2_BOVIN	155	179
DMPIQAFLL	0	0	1	0	0	0	sp|P02666|CASB_BOVIN	199	207
DMPIQAFLLYQEPVL	0	0	0	0	0	0	sp|P02666|CASB_BOVIN	199	213
DMPIQAFLLYQEPVLGPVRGPFPIIV	0	0	1	0	0	0	sp|P02666|CASB_BOVIN	199	224
DMPIQAFLLYQEPVLGPVRGPFPIIV	0	0	0	0	0	0	sp|P02666|CASB_BOVIN	199	224
DMPIQAFLLYQEPVLGPVRGPFPIIV	0	0	0	0	0	1	sp|P02666|CASB_BOVIN	199	224
DQAMEDIKQM	0	0	0	0	0	0	sp|P02662|CASA1_BOVIN	66	75
DQEILMHHPPQ	0	0	0	0	0	1	tr|A7MB65|A7MB65_BOVIN	388	398
DQVKRNAVPITPTLNREQLSTSEENSK	0	2	0	0	0	0	sp|P02663|CASA2_BOVIN	125	151
DQVKRNAVPITPTLNREQLSTSEENSKK	0	2	0	0	0	0	sp|P02663|CASA2_BOVIN	125	152
DRITGGKDFR	0	0	0	0	0	0	sp|P11151|LIPL_BOVIN	29	38
DVENLHLPLPL	0	0	0	0	0	0	sp|P02666|CASB_BOVIN	144	154
DVENLHLPLPLL	0	0	0	0	0	0	sp|P02666|CASB_BOVIN	144	155
DVENLHLPLPLLQ	0	0	0	0	0	0	sp|P02666|CASB_BOVIN	144	156
DVENLHLPLPLLQS	0	0	0	0	0	0	sp|P02666|CASB_BOVIN	144	157
DVENLHLPLPLLQSW	0	0	0	0	0	0	sp|P02666|CASB_BOVIN	144	158
DVENLHLPLPLLQSWMHQPHQPLPPT	0	0	0	0	0	1	sp|P02666|CASB_BOVIN	144	169
DVENLHLPLPLLQSWMHQPHQPLPPT	0	0	0	0	0	0	sp|P02666|CASB_BOVIN	144	169
DVENLHLPLPLLQSWMHQPHQPLPPTVMFPPQ	0	0	0	0	0	1	sp|P02666|CASB_BOVIN	144	175
DVENLHLPLPLLQSWMHQPHQPLPPTVMFPPQ	0	0	0	0	0	2	sp|P02666|CASB_BOVIN	144	175
DVENLHLPLPLLQSWMHQPHQPLPPTVMFPPQ	0	0	0	0	0	0	sp|P02666|CASB_BOVIN	144	175
DVENLHLPLPLLQSWMHQPHQPLPPTVMFPPQSV	0	0	0	0	0	1	sp|P02666|CASB_BOVIN	144	177
DVENLHLPLPLLQSWMHQPHQPLPPTVMFPPQSVL	0	0	0	0	0	1	sp|P02666|CASB_BOVIN	144	178
DVENLHLPLPLLQSWMHQPHQPLPPTVMFPPQSVL	0	0	0	0	0	0	sp|P02666|CASB_BOVIN	144	178
DVENLHLPLPLLQSWMHQPHQPLPPTVMFPPQSVLSL	0	0	0	0	0	1	sp|P02666|CASB_BOVIN	144	180
DVFEKGKVGG	0	0	0	0	0	0	tr|F1N2K1|F1N2K1_BOVIN	67	76
DVPSERYLGYL	0	0	0	0	0	0	sp|P02662|CASA1_BOVIN	100	110
DVPSERYLGYLE	0	0	0	0	0	0	sp|P02662|CASA1_BOVIN	100	111
DVPSERYLGYLEQ	0	0	0	0	0	0	sp|P02662|CASA1_BOVIN	100	112
DVPSERYLGYLEQL	0	0	0	0	0	0	sp|P02662|CASA1_BOVIN	100	113
DVPSERYLGYLEQLL	0	0	0	0	0	0	sp|P02662|CASA1_BOVIN	100	114
DVPSERYLGYLEQLLR	0	0	0	0	0	0	sp|P02662|CASA1_BOVIN	100	115
DVPSERYLGYLEQLLRL	0	0	0	0	0	0	sp|P02662|CASA1_BOVIN	100	116
DVPSERYLGYLEQLLRLK	0	0	0	0	0	0	sp|P02662|CASA1_BOVIN	100	117
DVPSERYLGYLEQLLRLKK	0	0	0	0	0	0	sp|P02662|CASA1_BOVIN	100	118
DVPSERYLGYLEQLLRLKKY	0	0	0	0	0	0	sp|P02662|CASA1_BOVIN	100	119
EAMAPKHKEMPFPK	0	0	1	0	0	0	sp|P02666|CASB_BOVIN	115	128
EAMAPKHKEMPFPK	0	0	0	0	0	0	sp|P02666|CASB_BOVIN	115	128
EAMAPKHKEMPFPK	0	0	1	1	0	0	sp|P02666|CASB_BOVIN	115	128
EAMAPKHKEMPFPKYPVEPF	0	0	0	0	0	0	sp|P02666|CASB_BOVIN	115	134
EAMAPKHKEMPFPKYPVEPFTESQ	0	0	0	0	0	0	sp|P02666|CASB_BOVIN	115	138
EAMAPKHKEMPFPKYPVEPFTESQSL	0	0	0	0	0	0	sp|P02666|CASB_BOVIN	115	140
EDDVPSLWVY	0	0	0	0	0	0	sp|P07318|CRBB1_BOVIN	169	178
EDELQDKIHPF	0	0	0	0	0	0	sp|P02666|CASB_BOVIN	57	67
EDELQDKIHPFAQTQ	0	0	0	0	0	0	sp|P02666|CASB_BOVIN	57	71
EDQAMEDIK	0	0	0	0	0	0	sp|P02662|CASA1_BOVIN	65	73
EDQEFQAKHLDQ	0	0	0	0	0	0	tr|E1BDJ1|E1BDJ1_BOVIN	617	628
EDQEILMHHPPQ	0	0	0	0	0	0	tr|A7MB65|A7MB65_BOVIN	387	398
EDVPSERYL	0	0	0	0	0	0	sp|P02662|CASA1_BOVIN	99	107
EDVPSERYLG	0	0	0	0	0	0	sp|P02662|CASA1_BOVIN	99	108
EDVPSERYLGYL	0	0	0	0	0	0	sp|P02662|CASA1_BOVIN	99	110
EDVPSERYLGYLEQL	0	0	0	0	0	0	sp|P02662|CASA1_BOVIN	99	113
EDVPSERYLGYLEQLL	0	0	0	0	0	0	sp|P02662|CASA1_BOVIN	99	114
EDVPSERYLGYLEQLLRL	0	0	0	0	0	0	sp|P02662|CASA1_BOVIN	99	116
EDVPSERYLGYLEQLLRLK	0	0	0	0	0	0	sp|P02662|CASA1_BOVIN	99	117
EDVPSERYLGYLEQLLRLKK	0	0	0	0	0	0	sp|P02662|CASA1_BOVIN	99	118
EDVPSERYLGYLEQLLRLKKY	0	0	0	0	0	0	sp|P02662|CASA1_BOVIN	99	119
EEEKNRLNF	0	0	0	0	0	0	sp|P02663|CASA2_BOVIN	170	178
EEEKNRLNFL	0	0	0	0	0	0	sp|P02663|CASA2_BOVIN	170	179
EEEKNRLNFLK	0	0	0	0	0	0	sp|P02663|CASA2_BOVIN	170	180
EEIVPNSVEQK	0	1	0	0	0	0	sp|P02662|CASA1_BOVIN	84	94
EEIVPNSVEQKHIQ	0	1	0	0	0	0	sp|P02662|CASA1_BOVIN	84	97
EEIVPNSVEQKHIQKEDVPSERYL	0	0	0	1	0	0	sp|P02662|CASA1_BOVIN	84	107
EEKNRLNF	0	0	0	0	0	0	sp|P02663|CASA2_BOVIN	171	178
EEPASPQEP	0	0	0	0	0	0	tr|G3N3T9|G3N3T9_BOVIN	15	23
EEQQQTEDELQDKIHPF	0	0	0	0	0	0	sp|P02666|CASB_BOVIN	51	67
EEQQQTEDELQDKIHPF	0	0	0	0	0	1	sp|P02666|CASB_BOVIN	51	67
EERLHSMKEGIH	0	0	0	0	0	0	sp|P02662|CASA1_BOVIN	132	143
EERLHSMKEGIHAQ	0	0	0	0	0	0	sp|P02662|CASA1_BOVIN	132	145
EESAEVATEEVK	0	1	0	0	0	0	sp|P02663|CASA2_BOVIN	74	85
EESITRINKKIEKFQSEEQQQTEDELQDKIHPF	0	3	0	1	0	0	sp|P02666|CASB_BOVIN	35	67
EGAEPVGQGAAAAVVVP	0	0	0	0	0	0	tr|F1MPT5|F1MPT5_BOVIN	2554	2570
EGIHAQQKEPM	0	0	0	0	0	0	sp|P02662|CASA1_BOVIN	140	150
EGIHAQQKEPMIG	0	0	0	0	0	0	sp|P02662|CASA1_BOVIN	140	152
EGIHAQQKEPMIGVN	0	0	0	0	0	0	sp|P02662|CASA1_BOVIN	140	154
EGIHAQQKEPMIGVNQ	0	0	0	0	0	0	sp|P02662|CASA1_BOVIN	140	155
EGIHAQQKEPMIGVNQEL	0	0	0	0	0	0	sp|P02662|CASA1_BOVIN	140	157
EGIHAQQKEPMIGVNQELA	0	0	1	0	0	0	sp|P02662|CASA1_BOVIN	140	158
EGIHAQQKEPMIGVNQELA	0	0	0	0	0	0	sp|P02662|CASA1_BOVIN	140	158
EGIHAQQKEPMIGVNQELAY	0	0	0	0	0	0	sp|P02662|CASA1_BOVIN	140	159
EGIHAQQKEPMIGVNQELAYFYPE	0	0	0	0	0	0	sp|P02662|CASA1_BOVIN	140	163
EGIHAQQKEPMIGVNQELAYFYPE	0	0	0	0	0	1	sp|P02662|CASA1_BOVIN	140	163
EGIHAQQKEPMIGVNQELAYFYPELF	0	0	0	0	0	0	sp|P02662|CASA1_BOVIN	140	165
EGIHAQQKEPMIGVNQELAYFYPELF	0	0	0	0	0	1	sp|P02662|CASA1_BOVIN	140	165
EGIHAQQKEPMIGVNQELAYFYPELFR	0	0	0	0	0	0	sp|P02662|CASA1_BOVIN	140	166
EGIHAQQKEPMIGVNQELAYFYPELFR	0	0	0	0	0	1	sp|P02662|CASA1_BOVIN	140	166
EGIHAQQKEPMIGVNQELAYFYPELFRQ	0	0	1	0	0	0	sp|P02662|CASA1_BOVIN	140	167
EGIHAQQKEPMIGVNQELAYFYPELFRQ	0	0	0	0	0	0	sp|P02662|CASA1_BOVIN	140	167
EGIHAQQKEPMIGVNQELAYFYPELFRQ	0	0	0	0	0	1	sp|P02662|CASA1_BOVIN	140	167
EGIHAQQKEPMIGVNQELAYFYPELFRQ	0	0	0	0	0	2	sp|P02662|CASA1_BOVIN	140	167
EGIHAQQKEPMIGVNQELAYFYPELFRQF	0	0	0	0	0	1	sp|P02662|CASA1_BOVIN	140	168
EGIHAQQKEPMIGVNQELAYFYPELFRQF	0	0	0	0	0	0	sp|P02662|CASA1_BOVIN	140	168
EGIHAQQKEPMIGVNQELAYFYPELFRQFYQ	0	0	0	0	0	1	sp|P02662|CASA1_BOVIN	140	170
EGIHAQQKEPMIGVNQELAYFYPELFRQFYQ	0	0	0	0	0	0	sp|P02662|CASA1_BOVIN	140	170
EGIHAQQKEPMIGVNQELAYFYPELFRQFYQL	0	0	0	0	0	0	sp|P02662|CASA1_BOVIN	140	171
EGIHAQQKEPMIGVNQELAYFYPELFRQFYQL	0	0	0	0	0	1	sp|P02662|CASA1_BOVIN	140	171
EGIHAQQKEPMIGVNQELAYFYPELFRQFYQLDAYPS	0	0	0	0	0	2	sp|P02662|CASA1_BOVIN	140	176
EGIHAQQKEPMIGVNQELAYFYPELFRQFYQLDAYPS	0	0	0	0	0	0	sp|P02662|CASA1_BOVIN	140	176
EIVDMIQNDGDLQ	0	0	1	0	0	0	tr|E1BIS9|E1BIS9_BOVIN	64	76
EIVPNSAEER	0	0	0	0	0	0	sp|P02662|CASA1_BOVIN	125	134
EIVPNSAEER	0	1	0	0	0	0	sp|P02662|CASA1_BOVIN	125	134
EIVPNSAEERL	0	0	0	0	0	1	sp|P02662|CASA1_BOVIN	125	135
EIVPNSAEERL	0	0	0	0	0	0	sp|P02662|CASA1_BOVIN	125	135
EIVPNSAEERL	0	1	0	0	0	0	sp|P02662|CASA1_BOVIN	125	135
EIVPNSAEERL	0	1	0	1	0	0	sp|P02662|CASA1_BOVIN	125	135
EIVPNSAEERLH	0	0	0	0	0	0	sp|P02662|CASA1_BOVIN	125	136
EIVPNSAEERLH	0	1	0	0	0	0	sp|P02662|CASA1_BOVIN	125	136
EIVPNSAEERLH	0	1	0	1	0	0	sp|P02662|CASA1_BOVIN	125	136
EIVPNSAEERLHSM	0	0	0	0	0	0	sp|P02662|CASA1_BOVIN	125	138
EIVPNSAEERLHSM	0	1	0	0	0	0	sp|P02662|CASA1_BOVIN	125	138
EIVPNSAEERLHSMK	0	1	0	0	0	0	sp|P02662|CASA1_BOVIN	125	139
EIVPNSAEERLHSMK	0	1	0	1	0	0	sp|P02662|CASA1_BOVIN	125	139
EIVPNSAEERLHSMKE	0	1	0	0	0	0	sp|P02662|CASA1_BOVIN	125	140
EIVPNSAEERLHSMKEGIH	0	1	0	0	0	0	sp|P02662|CASA1_BOVIN	125	143
EIVPNSAEERLHSMKEGIHA	0	1	0	0	0	0	sp|P02662|CASA1_BOVIN	125	144
EIVPNSAEERLHSMKEGIHAQ	0	0	0	0	0	0	sp|P02662|CASA1_BOVIN	125	145
EIVPNSAEERLHSMKEGIHAQ	0	1	0	0	0	0	sp|P02662|CASA1_BOVIN	125	145
EIVPNSVEQK	0	1	0	0	0	0	sp|P02662|CASA1_BOVIN	85	94
EIVPNSVEQKHIQ	0	1	0	0	0	0	sp|P02662|CASA1_BOVIN	85	97
EIVPNSVEQKHIQKE	0	1	0	0	0	0	sp|P02662|CASA1_BOVIN	85	99
EKDERFFSDK	0	0	0	0	0	0	sp|P02668|CASK_BOVIN	33	42
EKFQSEEQQQTEDELQ	0	1	0	0	0	0	sp|P02666|CASB_BOVIN	46	61
EKFQSEEQQQTEDELQDKIHPF	0	1	0	0	0	0	sp|P02666|CASB_BOVIN	46	67
EKVNELSKDIG	0	0	0	0	0	0	sp|P02662|CASA1_BOVIN	50	60
EKVNELSKDIGSE	0	1	0	0	0	0	sp|P02662|CASA1_BOVIN	50	62
EKVNELSKDIGSESTEDQAMEDIK	0	2	0	0	0	0	sp|P02662|CASA1_BOVIN	50	73
EKVNELSKDIGSESTEDQAMEDIK	0	3	0	0	0	0	sp|P02662|CASA1_BOVIN	50	73
ELAYFYPELFR	0	0	0	0	0	0	sp|P02662|CASA1_BOVIN	156	166
ELAYFYPELFRQ	0	0	0	0	0	0	sp|P02662|CASA1_BOVIN	156	167
ELEELNVPGEIVESLSSSEESITRINK	0	3	0	0	0	0	sp|P02666|CASB_BOVIN	17	43
ELFRQFY	0	0	0	0	0	0	sp|P02662|CASA1_BOVIN	163	169
ELFRQFYQ	0	0	0	0	0	0	sp|P02662|CASA1_BOVIN	163	170
ELQDKIHPF	0	0	0	0	0	0	sp|P02666|CASB_BOVIN	59	67
ELQDKIHPF	0	0	0	1	0	0	sp|P02666|CASB_BOVIN	59	67
ELSKDIGSESTE	0	1	0	0	0	0	sp|P02662|CASA1_BOVIN	54	65
ELSKDIGSESTEDQAMEDIK	0	1	0	0	0	0	sp|P02662|CASA1_BOVIN	54	73
ELSKDIGSESTEDQAMEDIK	0	2	0	0	0	0	sp|P02662|CASA1_BOVIN	54	73
ELSKDIGSESTEDQAMEDIK	0	3	0	0	0	0	sp|P02662|CASA1_BOVIN	54	73
ELSKDIGSESTEDQAMEDIKQ	0	2	0	0	0	0	sp|P02662|CASA1_BOVIN	54	74
ELSKDIGSESTEDQAMEDIKQM	0	2	0	0	0	0	sp|P02662|CASA1_BOVIN	54	75
ELSKDIGSESTEDQAMEDIKQM	0	3	0	0	0	0	sp|P02662|CASA1_BOVIN	54	75
ELSKDIGSESTEDQAMEDIKQME	0	2	0	0	0	0	sp|P02662|CASA1_BOVIN	54	76
ELSKDIGSESTEDQAMEDIKQME	0	3	0	0	0	0	sp|P02662|CASA1_BOVIN	54	76
ELSKDIGSESTEDQAMEDIKQMEAE	0	2	0	0	0	0	sp|P02662|CASA1_BOVIN	54	78
EMPFPKYP	0	0	0	0	0	0	sp|P02666|CASB_BOVIN	123	130
EMPFPKYPV	0	0	0	0	0	0	sp|P02666|CASB_BOVIN	123	131
EMPFPKYPVEP	0	0	0	0	0	0	sp|P02666|CASB_BOVIN	123	133
EMPFPKYPVEPF	0	0	1	0	0	0	sp|P02666|CASB_BOVIN	123	134
EMPFPKYPVEPF	0	0	0	0	0	0	sp|P02666|CASB_BOVIN	123	134
EMPFPKYPVEPF	0	0	0	1	0	0	sp|P02666|CASB_BOVIN	123	134
EMPFPKYPVEPFT	0	0	0	0	0	0	sp|P02666|CASB_BOVIN	123	135
EMPFPKYPVEPFTE	0	0	0	0	0	0	sp|P02666|CASB_BOVIN	123	136
EMPFPKYPVEPFTESQ	0	0	1	0	0	0	sp|P02666|CASB_BOVIN	123	138
EMPFPKYPVEPFTESQ	0	0	0	0	0	0	sp|P02666|CASB_BOVIN	123	138
EMPFPKYPVEPFTESQ	0	0	0	0	0	1	sp|P02666|CASB_BOVIN	123	138
EMPFPKYPVEPFTESQS	0	0	0	0	0	0	sp|P02666|CASB_BOVIN	123	139
EMPFPKYPVEPFTESQSL	0	0	1	0	0	0	sp|P02666|CASB_BOVIN	123	140
EMPFPKYPVEPFTESQSL	0	0	0	0	0	1	sp|P02666|CASB_BOVIN	123	140
EMPFPKYPVEPFTESQSL	0	0	0	0	0	0	sp|P02666|CASB_BOVIN	123	140
EMPFPKYPVEPFTESQSLT	0	0	0	0	0	0	sp|P02666|CASB_BOVIN	123	141
EMPFPKYPVEPFTESQSLTL	0	0	0	0	0	0	sp|P02666|CASB_BOVIN	123	142
EMPFPKYPVEPFTESQSLTLTDVENL	0	0	0	0	0	1	sp|P02666|CASB_BOVIN	123	148
EMPFPKYPVEPFTESQSLTLTDVENLHL	0	0	0	0	0	0	sp|P02666|CASB_BOVIN	123	150
EMPFPKYPVEPFTESQSLTLTDVENLHLPL	0	0	0	0	0	0	sp|P02666|CASB_BOVIN	123	152
EMPFPKYPVEPFTESQSLTLTDVENLHLPLP	0	0	1	0	0	0	sp|P02666|CASB_BOVIN	123	153
EMPFPKYPVEPFTESQSLTLTDVENLHLPLP	0	0	0	0	0	0	sp|P02666|CASB_BOVIN	123	153
EMPFPKYPVEPFTESQSLTLTDVENLHLPLPL	0	0	1	0	0	0	sp|P02666|CASB_BOVIN	123	154
EMPFPKYPVEPFTESQSLTLTDVENLHLPLPL	0	0	0	0	0	0	sp|P02666|CASB_BOVIN	123	154
EMPFPKYPVEPFTESQSLTLTDVENLHLPLPL	0	0	0	0	0	1	sp|P02666|CASB_BOVIN	123	154
EMPFPKYPVEPFTESQSLTLTDVENLHLPLPLL	0	0	0	0	0	1	sp|P02666|CASB_BOVIN	123	155
EMPFPKYPVEPFTESQSLTLTDVENLHLPLPLL	0	0	0	0	0	0	sp|P02666|CASB_BOVIN	123	155
EMPFPKYPVEPFTESQSLTLTDVENLHLPLPLLQ	0	0	0	0	0	0	sp|P02666|CASB_BOVIN	123	156
EMPFPKYPVEPFTESQSLTLTDVENLHLPLPLLQ	0	0	0	0	0	2	sp|P02666|CASB_BOVIN	123	156
EMPFPKYPVEPFTESQSLTLTDVENLHLPLPLLQ	0	0	0	0	0	1	sp|P02666|CASB_BOVIN	123	156
EMPFPKYPVEPFTESQSLTLTDVENLHLPLPLLQS	0	0	1	0	0	0	sp|P02666|CASB_BOVIN	123	157
EMPFPKYPVEPFTESQSLTLTDVENLHLPLPLLQS	0	0	0	0	0	0	sp|P02666|CASB_BOVIN	123	157
EMPFPKYPVEPFTESQSLTLTDVENLHLPLPLLQS	0	0	0	0	0	2	sp|P02666|CASB_BOVIN	123	157
EMPFPKYPVEPFTESQSLTLTDVENLHLPLPLLQS	0	0	0	0	0	1	sp|P02666|CASB_BOVIN	123	157
EMPFPKYPVEPFTESQSLTLTDVENLHLPLPLLQSW	0	0	1	0	0	0	sp|P02666|CASB_BOVIN	123	158
EMPFPKYPVEPFTESQSLTLTDVENLHLPLPLLQSW	0	0	0	0	0	0	sp|P02666|CASB_BOVIN	123	158
EMPFPKYPVEPFTESQSLTLTDVENLHLPLPLLQSWM	0	0	0	0	0	2	sp|P02666|CASB_BOVIN	123	159
EMPFPKYPVEPFTESQSLTLTDVENLHLPLPLLQSWM	0	0	0	0	0	0	sp|P02666|CASB_BOVIN	123	159
ENLHLPLPLLQ	0	0	0	0	0	0	sp|P02666|CASB_BOVIN	146	156
EPPGVVGGPGEKAKPLVL	0	0	0	0	0	0	tr|F1N4Q3|F1N4Q3_BOVIN	136	153
EPPKPDKGKGPP	0	0	0	1	0	0	tr|E1B808|E1B808_BOVIN	834	845
EPVKAAEVPAPIRDLSVKDST	0	2	0	0	0	0	tr|F1N757|F1N757_BOVIN	28397	28417
EPVLGPVRGP	0	0	0	0	0	0	sp|P02666|CASB_BOVIN	210	219
EPVLGPVRGPFP	0	0	0	0	0	0	sp|P02666|CASB_BOVIN	210	221
EPVLGPVRGPFP	0	0	0	1	0	0	sp|P02666|CASB_BOVIN	210	221
EPVLGPVRGPFPI	0	0	0	0	0	0	sp|P02666|CASB_BOVIN	210	222
EPVLGPVRGPFPII	0	0	0	0	0	0	sp|P02666|CASB_BOVIN	210	223
EPVLGPVRGPFPIIV	0	0	0	0	0	0	sp|P02666|CASB_BOVIN	210	224
EPVLGPVRGPFPIIV	0	0	0	1	0	0	sp|P02666|CASB_BOVIN	210	224
EQKHIQKEDVPSERYL	0	0	0	0	0	0	sp|P02662|CASA1_BOVIN	92	107
EQLLRLK	0	0	0	0	0	0	sp|P02662|CASA1_BOVIN	111	117
EQLSTSEENSKKTVD	0	1	0	0	0	0	sp|P02663|CASA2_BOVIN	141	155
EQLSTSEENSKKTVDMESTEVFTKK	0	3	0	0	0	0	sp|P02663|CASA2_BOVIN	141	165
EQQQTEDELQDK	0	0	0	0	0	0	sp|P02666|CASB_BOVIN	52	63
EQQQTEDELQDKIHPF	0	0	0	0	0	0	sp|P02666|CASB_BOVIN	52	67
ERLHSMKEGIHAQ	0	0	0	0	0	0	sp|P02662|CASA1_BOVIN	133	145
ERYLGYLE	0	0	0	0	0	0	sp|P02662|CASA1_BOVIN	104	111
ERYLGYLEQ	0	0	0	0	0	0	sp|P02662|CASA1_BOVIN	104	112
ERYLGYLEQL	0	0	0	0	0	0	sp|P02662|CASA1_BOVIN	104	113
ERYLGYLEQLL	0	0	0	0	0	0	sp|P02662|CASA1_BOVIN	104	114
ERYLGYLEQLLRL	0	0	0	0	0	0	sp|P02662|CASA1_BOVIN	104	116
ERYLGYLEQLLRLK	0	0	0	0	0	0	sp|P02662|CASA1_BOVIN	104	117
ERYLGYLEQLLRLKKY	0	0	0	0	0	0	sp|P02662|CASA1_BOVIN	104	119
ERYLGYLEQLLRLKKYK	0	0	0	0	0	0	sp|P02662|CASA1_BOVIN	104	120
ESAEVATEEVK	0	1	0	0	0	0	sp|P02663|CASA2_BOVIN	75	85
ESTEVFTKKTK	0	1	0	0	0	0	sp|P02663|CASA2_BOVIN	157	167
ESTEVFTKKTKLTEEEKNRL	0	0	0	0	0	0	sp|P02663|CASA2_BOVIN	157	176
ETKKPAIKQEAVPDMEDSPPVSDSDEQQESVRAAPERS	0	3	0	0	0	0	tr|E1BCR2|E1BCR2_BOVIN	790	827
EVFGKEKVN	0	0	0	0	0	0	sp|P02662|CASA1_BOVIN	45	53
EVFGKEKVN	0	0	0	1	0	0	sp|P02662|CASA1_BOVIN	45	53
EVFGKEKVNEL	0	0	0	0	0	0	sp|P02662|CASA1_BOVIN	45	55
EVKITVDDKHYQK	0	0	0	0	0	0	sp|P02663|CASA2_BOVIN	83	95
EVLNENLLR	0	0	0	0	0	0	sp|P02662|CASA1_BOVIN	29	37
EVLNENLLRF	0	0	0	0	0	0	sp|P02662|CASA1_BOVIN	29	38
EVLNENLLRFF	0	0	0	0	0	0	sp|P02662|CASA1_BOVIN	29	39
EVLNENLLRFFVAPFPEVF	0	0	0	0	0	1	sp|P02662|CASA1_BOVIN	29	47
FALPQYLK	0	0	0	0	0	0	sp|P02663|CASA2_BOVIN	189	196
FALPQYLKT	0	0	0	0	0	0	sp|P02663|CASA2_BOVIN	189	197
FALPQYLKTVYQHQ	0	0	0	0	0	0	sp|P02663|CASA2_BOVIN	189	202
FALPQYLKTVYQHQKA	0	0	0	0	0	0	sp|P02663|CASA2_BOVIN	189	204
FAQTQSLVYPFPGPIPN	0	0	0	0	0	0	sp|P02666|CASB_BOVIN	67	83
FFVAPFPEVF	0	0	0	0	0	0	sp|P02662|CASA1_BOVIN	38	47
FFVAPFPEVFGKEKVN	0	0	0	0	0	0	sp|P02662|CASA1_BOVIN	38	53
FFVAPFPEVFGKEKVNELSKDIGSESTEDQAMEDIK	0	2	0	0	0	0	sp|P02662|CASA1_BOVIN	38	73
FGKEKVNE	0	0	0	0	0	0	sp|P02662|CASA1_BOVIN	47	54
FGKEKVNEL	0	0	0	0	0	0	sp|P02662|CASA1_BOVIN	47	55
FHSLEDKL	0	1	0	0	0	0	sp|P31098|OSTK_BOVIN	242	249
FLKKISQR	0	0	0	0	0	0	sp|P02663|CASA2_BOVIN	178	185
FLKKISQRY	0	0	0	0	0	0	sp|P02663|CASA2_BOVIN	178	186
FLKKISQRYQ	0	0	0	0	0	0	sp|P02663|CASA2_BOVIN	178	187
FLLYQEPVL	0	0	0	0	0	0	sp|P02666|CASB_BOVIN	205	213
FLLYQEPVLGPVRGP	0	0	0	0	0	0	sp|P02666|CASB_BOVIN	205	219
FLLYQEPVLGPVRGPFPIIV	0	0	0	0	0	0	sp|P02666|CASB_BOVIN	205	224
FLPYPYYAKPA	0	0	0	0	0	0	sp|P02668|CASK_BOVIN	76	86
FLQPEVM	0	0	1	0	0	0	sp|P02666|CASB_BOVIN	102	108
FLQPEVMGV	0	0	0	0	0	0	sp|P02666|CASB_BOVIN	102	110
FPDVVPLQPE	0	0	0	0	0	0	tr|F6RL69|F6RL69_BOVIN	223	232
FPEVFGK	0	0	0	0	0	0	sp|P02662|CASA1_BOVIN	43	49
FPEVFGKEKVN	0	0	0	0	0	0	sp|P02662|CASA1_BOVIN	43	53
FPGPIPNSLPQ	0	0	0	0	0	0	sp|P02666|CASB_BOVIN	77	87
FPGPIPNSLPQNIPPL	0	0	0	0	0	0	sp|P02666|CASB_BOVIN	77	92
FPKYPVEP	0	0	0	0	0	0	sp|P02666|CASB_BOVIN	126	133
FPKYPVEPF	0	0	0	0	0	0	sp|P02666|CASB_BOVIN	126	134
FPKYPVEPFT	0	0	0	0	0	0	sp|P02666|CASB_BOVIN	126	135
FPKYPVEPFTESQ	0	0	0	0	0	0	sp|P02666|CASB_BOVIN	126	138
FPKYPVEPFTESQSL	0	0	0	0	0	0	sp|P02666|CASB_BOVIN	126	140
FPPGTG	0	0	0	0	0	0	tr|A5PKC2|A5PKC2_BOVIN	226	231
FPPQSVLSL	0	0	0	0	0	0	sp|P02666|CASB_BOVIN	172	180
FQSEEQQQTED	0	1	0	0	0	0	sp|P02666|CASB_BOVIN	48	58
FQSEEQQQTEDELQDKIHPF	0	0	0	0	0	0	sp|P02666|CASB_BOVIN	48	67
FQSEEQQQTEDELQDKIHPF	0	1	0	0	0	0	sp|P02666|CASB_BOVIN	48	67
FQSEEQQQTEDELQDKIHPFA	0	1	0	0	0	0	sp|P02666|CASB_BOVIN	48	68
FQSEEQQQTEDELQDKIHPFAQ	0	1	0	0	0	0	sp|P02666|CASB_BOVIN	48	69
FQSEEQQQTEDELQDKIHPFAQT	0	1	0	0	0	0	sp|P02666|CASB_BOVIN	48	70
FQSEEQQQTEDELQDKIHPFAQTQ	0	0	0	0	0	0	sp|P02666|CASB_BOVIN	48	71
FQSEEQQQTEDELQDKIHPFAQTQ	0	1	0	0	0	0	sp|P02666|CASB_BOVIN	48	71
FQSEEQQQTEDELQDKIHPFAQTQSL	0	1	0	0	0	0	sp|P02666|CASB_BOVIN	48	73
FRQFYQLDAYPS	0	0	0	0	0	0	sp|P02662|CASA1_BOVIN	165	176
FSDIPNPIGSE	0	0	0	0	0	0	sp|P02662|CASA1_BOVIN	194	204
FSDIPNPIGSEN	0	0	0	0	0	0	sp|P02662|CASA1_BOVIN	194	205
FSDIPNPIGSENSEK	0	0	0	0	0	0	sp|P02662|CASA1_BOVIN	194	208
FSDIPNPIGSENSEKT	0	0	0	0	0	0	sp|P02662|CASA1_BOVIN	194	209
FSDIPNPIGSENSEKTTMPL	0	0	0	0	0	0	sp|P02662|CASA1_BOVIN	194	213
FSDIPNPIGSENSEKTTMPLW	0	0	1	0	0	0	sp|P02662|CASA1_BOVIN	194	214
FSDIPNPIGSENSEKTTMPLW	0	0	0	0	0	0	sp|P02662|CASA1_BOVIN	194	214
FSDIPNPIGSENSEKTTMPLW	0	0	0	0	0	1	sp|P02662|CASA1_BOVIN	194	214
FSDKIAKYIPIQ	0	0	0	0	0	0	sp|P02668|CASK_BOVIN	39	50
FSDKIAKYIPIQY	0	0	0	0	0	0	sp|P02668|CASK_BOVIN	39	51
FSDKIAKYIPIQYVL	0	0	0	0	0	0	sp|P02668|CASK_BOVIN	39	53
FTKKTKLTEEEKNRLN	0	0	0	0	0	0	sp|P02663|CASA2_BOVIN	162	177
FVAPFPEV	0	0	0	0	0	0	sp|P02662|CASA1_BOVIN	39	46
FVAPFPEVF	0	0	0	0	0	0	sp|P02662|CASA1_BOVIN	39	47
FVAPFPEVFG	0	0	0	0	0	0	sp|P02662|CASA1_BOVIN	39	48
FVAPFPEVFGK	0	0	0	0	0	0	sp|P02662|CASA1_BOVIN	39	49
FVAPFPEVFGKE	0	0	0	0	0	0	sp|P02662|CASA1_BOVIN	39	50
FVAPFPEVFGKEK	0	0	0	0	0	0	sp|P02662|CASA1_BOVIN	39	51
FVAPFPEVFGKEKV	0	0	0	0	0	0	sp|P02662|CASA1_BOVIN	39	52
FVAPFPEVFGKEKVN	0	0	0	0	0	0	sp|P02662|CASA1_BOVIN	39	53
FVAPFPEVFGKEKVN	0	0	0	0	0	1	sp|P02662|CASA1_BOVIN	39	53
FVAPFPEVFGKEKVNE	0	0	0	0	0	0	sp|P02662|CASA1_BOVIN	39	54
FVAPFPEVFGKEKVNEL	0	0	0	0	0	0	sp|P02662|CASA1_BOVIN	39	55
FVAPFPEVFGKEKVNEL	0	0	0	0	0	1	sp|P02662|CASA1_BOVIN	39	55
FVAPFPEVFGKEKVNELSK	0	0	0	0	0	0	sp|P02662|CASA1_BOVIN	39	57
FVAPFPEVFGKEKVNELSKD	0	0	0	0	0	0	sp|P02662|CASA1_BOVIN	39	58
FVAPFPEVFGKEKVNELSKDIG	0	0	0	0	0	0	sp|P02662|CASA1_BOVIN	39	60
FVAPFPEVFGKEKVNELSKDIG	0	0	0	0	0	1	sp|P02662|CASA1_BOVIN	39	60
FVAPFPEVFGKEKVNELSKDIGSESTEDQAMEDIK	0	2	0	0	0	0	sp|P02662|CASA1_BOVIN	39	73
FVAPFPEVFGKEKVNELSKDIGSESTEDQAMEDIK	0	3	0	0	0	0	sp|P02662|CASA1_BOVIN	39	73
FVAPFPEVFGKEKVNELSKDIGSESTEDQAMEDIK	0	1	0	0	0	0	sp|P02662|CASA1_BOVIN	39	73
FVAPFPEVFGKEKVNELSKDIGSESTEDQAMEDIKQ	0	2	0	0	0	0	sp|P02662|CASA1_BOVIN	39	74
FVAPFPEVFGKEKVNELSKDIGSESTEDQAMEDIKQM	0	2	0	0	0	0	sp|P02662|CASA1_BOVIN	39	75
FVAPFPEVFGKEKVNELSKDIGSESTEDQAMEDIKQM	0	3	0	0	0	0	sp|P02662|CASA1_BOVIN	39	75
FVAPFPEVFGKEKVNELSKDIGSESTEDQAMEDIKQME	0	3	0	0	0	0	sp|P02662|CASA1_BOVIN	39	76
FVAPFPEVFGKEKVNELSKDIGSESTEDQAMEDIKQMEAE	0	2	0	0	0	0	sp|P02662|CASA1_BOVIN	39	78
FYPELFR	0	0	0	0	0	0	sp|P02662|CASA1_BOVIN	160	166
FYPELFRQF	0	0	0	0	0	0	sp|P02662|CASA1_BOVIN	160	168
FYPELFRQFYQL	0	0	0	0	0	0	sp|P02662|CASA1_BOVIN	160	171
FYQKFPQY	0	0	0	0	0	0	sp|P02663|CASA2_BOVIN	103	110
FYQKFPQYLQY	0	0	0	0	0	0	sp|P02663|CASA2_BOVIN	103	113
FYQKFPQYLQYLYQGPIVLNPWDQVKR	0	0	0	0	0	0	sp|P02663|CASA2_BOVIN	103	129
FYQLDAYPSGAWYYVPLGTQYTDAPSFSDIPNPIGSENSEK	0	0	0	0	0	1	sp|P02662|CASA1_BOVIN	168	208
GAEVPDPEPLP	0	0	0	0	0	0	tr|F1MX26|F1MX26_BOVIN	377	387
GAVGLGGVSPAAAAKAAK	0	1	0	0	0	0	sp|P04985|ELN_BOVIN	671	688
GAWYYVPLGTQ	0	0	0	0	0	0	sp|P02662|CASA1_BOVIN	177	187
GAWYYVPLGTQYTDAPSFSDIPNPIGSE	0	0	0	0	0	0	sp|P02662|CASA1_BOVIN	177	204
GAWYYVPLGTQYTDAPSFSDIPNPIGSEN	0	0	0	0	0	0	sp|P02662|CASA1_BOVIN	177	205
GAWYYVPLGTQYTDAPSFSDIPNPIGSENSE	0	0	0	0	0	1	sp|P02662|CASA1_BOVIN	177	207
GAWYYVPLGTQYTDAPSFSDIPNPIGSENSE	0	0	0	0	0	0	sp|P02662|CASA1_BOVIN	177	207
GAWYYVPLGTQYTDAPSFSDIPNPIGSENSEK	0	0	0	0	0	0	sp|P02662|CASA1_BOVIN	177	208
GAWYYVPLGTQYTDAPSFSDIPNPIGSENSEK	0	0	0	0	0	1	sp|P02662|CASA1_BOVIN	177	208
GAWYYVPLGTQYTDAPSFSDIPNPIGSENSEKT	0	0	0	0	0	0	sp|P02662|CASA1_BOVIN	177	209
GAWYYVPLGTQYTDAPSFSDIPNPIGSENSEKT	0	0	0	0	0	1	sp|P02662|CASA1_BOVIN	177	209
GAWYYVPLGTQYTDAPSFSDIPNPIGSENSEKTTMPL	0	0	0	0	0	1	sp|P02662|CASA1_BOVIN	177	213
GAWYYVPLGTQYTDAPSFSDIPNPIGSENSEKTTMPL	0	0	0	0	0	0	sp|P02662|CASA1_BOVIN	177	213
GAWYYVPLGTQYTDAPSFSDIPNPIGSENSEKTTMPL	0	0	0	0	0	2	sp|P02662|CASA1_BOVIN	177	213
GAWYYVPLGTQYTDAPSFSDIPNPIGSENSEKTTMPLW	0	0	0	0	0	1	sp|P02662|CASA1_BOVIN	177	214
GAWYYVPLGTQYTDAPSFSDIPNPIGSENSEKTTMPLW	0	0	0	0	0	2	sp|P02662|CASA1_BOVIN	177	214
GAWYYVPLGTQYTDAPSFSDIPNPIGSENSEKTTMPLW	0	0	1	0	0	0	sp|P02662|CASA1_BOVIN	177	214
GAWYYVPLGTQYTDAPSFSDIPNPIGSENSEKTTMPLW	0	0	0	0	0	0	sp|P02662|CASA1_BOVIN	177	214
GEDSASGDIETLHSK	0	0	0	0	0	0	sp|P18892|BT1A1_BOVIN	501	515
GEDSASGDIETLHSKLIPLQPSQGVP	0	0	0	0	0	1	sp|P18892|BT1A1_BOVIN	501	526
GEDSASGDIETLHSKLIPLQPSQGVP	0	0	0	0	0	0	sp|P18892|BT1A1_BOVIN	501	526
GFIPLVIYLGF	0	0	0	0	0	0	sp|Q2KI08|TOM7_BOVIN	26	36
GIHAQQKEPM	0	0	0	0	0	0	sp|P02662|CASA1_BOVIN	141	150
GIHAQQKEPMIGVNQELA	0	0	0	0	0	0	sp|P02662|CASA1_BOVIN	141	158
GKEKVNELSKDIG	0	0	0	0	0	0	sp|P02662|CASA1_BOVIN	48	60
GKEKVNELSKDIG	0	1	0	0	0	0	sp|P02662|CASA1_BOVIN	48	60
GKEKVNELSKDIGS	0	1	0	0	0	0	sp|P02662|CASA1_BOVIN	48	61
GKEKVNELSKDIGSE	0	1	0	0	0	0	sp|P02662|CASA1_BOVIN	48	62
GKEKVNELSKDIGSESTE	0	2	0	0	0	0	sp|P02662|CASA1_BOVIN	48	65
GKEKVNELSKDIGSESTE	0	3	0	0	0	0	sp|P02662|CASA1_BOVIN	48	65
GKEKVNELSKDIGSESTED	0	2	0	0	0	0	sp|P02662|CASA1_BOVIN	48	66
GKEKVNELSKDIGSESTEDQ	0	2	0	0	0	0	sp|P02662|CASA1_BOVIN	48	67
GKEKVNELSKDIGSESTEDQA	0	2	0	0	0	0	sp|P02662|CASA1_BOVIN	48	68
GKEKVNELSKDIGSESTEDQAM	0	2	0	0	0	0	sp|P02662|CASA1_BOVIN	48	69
GKEKVNELSKDIGSESTEDQAMED	0	2	0	0	0	0	sp|P02662|CASA1_BOVIN	48	71
GKEKVNELSKDIGSESTEDQAMEDIK	0	1	0	0	0	0	sp|P02662|CASA1_BOVIN	48	73
GKEKVNELSKDIGSESTEDQAMEDIK	0	2	0	0	0	0	sp|P02662|CASA1_BOVIN	48	73
GKEKVNELSKDIGSESTEDQAMEDIK	0	3	0	0	0	0	sp|P02662|CASA1_BOVIN	48	73
GKEKVNELSKDIGSESTEDQAMEDIKQ	0	2	0	0	0	0	sp|P02662|CASA1_BOVIN	48	74
GKEKVNELSKDIGSESTEDQAMEDIKQ	0	3	0	0	0	0	sp|P02662|CASA1_BOVIN	48	74
GKEKVNELSKDIGSESTEDQAMEDIKQM	0	2	0	0	0	0	sp|P02662|CASA1_BOVIN	48	75
GKEKVNELSKDIGSESTEDQAMEDIKQM	0	3	0	0	0	0	sp|P02662|CASA1_BOVIN	48	75
GKEKVNELSKDIGSESTEDQAMEDIKQMEAE	0	2	0	0	0	0	sp|P02662|CASA1_BOVIN	48	78
GLIKEQYEGRL	0	0	0	0	0	0	sp|P81265|PIGR_BOVIN	402	412
GLNYYQQKPV	0	0	0	0	0	0	sp|P02668|CASK_BOVIN	60	69
GLNYYQQKPVA	0	0	0	0	0	0	sp|P02668|CASK_BOVIN	60	70
GLPQEVLNENLLR	0	0	0	0	0	0	sp|P02662|CASA1_BOVIN	25	37
GLPQEVLNENLLRF	0	0	0	0	0	0	sp|P02662|CASA1_BOVIN	25	38
GLPQEVLNENLLRFF	0	0	0	0	0	0	sp|P02662|CASA1_BOVIN	25	39
GLPQEVLNENLLRFFVAPFPEVFGK	0	0	0	0	0	0	sp|P02662|CASA1_BOVIN	25	49
GLPQEVLNENLLRFFVAPFPEVFGKEKVN	0	0	0	0	0	1	sp|P02662|CASA1_BOVIN	25	53
GPIPNSLPQ	0	0	0	0	0	1	sp|P02666|CASB_BOVIN	79	87
GPIVLNPWDQVK	0	0	0	0	0	0	sp|P02663|CASA2_BOVIN	117	128
GPIVLNPWDQVK	0	0	0	0	0	1	sp|P02663|CASA2_BOVIN	117	128
GPIVLNPWDQVKR	0	0	0	0	0	0	sp|P02663|CASA2_BOVIN	117	129
GPIVLNPWDQVKR	0	0	0	0	0	1	sp|P02663|CASA2_BOVIN	117	129
GPIVLNPWDQVKRN	0	0	0	0	0	0	sp|P02663|CASA2_BOVIN	117	130
GPIVLNPWDQVKRN	0	0	0	0	0	1	sp|P02663|CASA2_BOVIN	117	130
GPVRGPFP	0	0	0	0	0	0	sp|P02666|CASB_BOVIN	214	221
GPVRGPFPI	0	0	0	0	0	0	sp|P02666|CASB_BOVIN	214	222
GPVRGPFPII	0	0	0	0	0	0	sp|P02666|CASB_BOVIN	214	223
GPVRGPFPIIV	0	0	0	0	0	0	sp|P02666|CASB_BOVIN	214	224
GRVSLVEDHIAEGSVAVR	0	0	0	0	0	0	sp|P18892|BT1A1_BOVIN	93	110
GTQYTDAPSFSDIPNPIGSENSEK	0	0	0	0	0	0	sp|P02662|CASA1_BOVIN	185	208
GTQYTDAPSFSDIPNPIGSENSEKT	0	0	0	0	0	0	sp|P02662|CASA1_BOVIN	185	209
GTQYTDAPSFSDIPNPIGSENSEKTTMPL	0	0	0	0	0	0	sp|P02662|CASA1_BOVIN	185	213
GTQYTDAPSFSDIPNPIGSENSEKTTMPL	0	0	0	0	0	1	sp|P02662|CASA1_BOVIN	185	213
GTQYTDAPSFSDIPNPIGSENSEKTTMPLW	0	0	1	0	0	0	sp|P02662|CASA1_BOVIN	185	214
GTQYTDAPSFSDIPNPIGSENSEKTTMPLW	0	0	0	0	0	0	sp|P02662|CASA1_BOVIN	185	214
GTQYTDAPSFSDIPNPIGSENSEKTTMPLW	0	0	0	0	0	1	sp|P02662|CASA1_BOVIN	185	214
GTWNPGRPEPG	0	0	0	0	0	0	sp|P02672|FIBA_BOVIN	311	321
GVPGAVSPAAAAKAAAKAAK	0	1	0	0	0	0	tr|F1N0H9|F1N0H9_BOVIN	386	405
GVSKVKEAM	0	0	1	0	0	0	sp|P02666|CASB_BOVIN	109	117
GVSKVKEAM	0	0	0	0	0	0	sp|P02666|CASB_BOVIN	109	117
GVSKVKEAMA	0	0	0	0	0	0	sp|P02666|CASB_BOVIN	109	118
GVSKVKEAMAP	0	0	0	0	0	0	sp|P02666|CASB_BOVIN	109	119
GVSKVKEAMAPK	0	0	1	0	0	0	sp|P02666|CASB_BOVIN	109	120
GVSKVKEAMAPK	0	0	0	0	0	0	sp|P02666|CASB_BOVIN	109	120
GVSKVKEAMAPKH	0	0	0	0	0	0	sp|P02666|CASB_BOVIN	109	121
GVSKVKEAMAPKHK	0	0	0	0	0	0	sp|P02666|CASB_BOVIN	109	122
GVSKVKEAMAPKHKE	0	0	0	0	0	0	sp|P02666|CASB_BOVIN	109	123
GVSKVKEAMAPKHKEMPFPK	0	0	0	0	0	0	sp|P02666|CASB_BOVIN	109	128
GVSKVKEAMAPKHKEMPFPK	0	0	1	0	0	0	sp|P02666|CASB_BOVIN	109	128
GVSKVKEAMAPKHKEMPFPKYPVEPF	0	0	0	0	0	0	sp|P02666|CASB_BOVIN	109	134
GVSKVKEAMAPKHKEMPFPKYPVEPF	0	0	1	0	0	0	sp|P02666|CASB_BOVIN	109	134
GVSKVKEAMAPKHKEMPFPKYPVEPFTESQ	0	0	0	0	0	0	sp|P02666|CASB_BOVIN	109	138
GVVDRTKGAVTG	0	0	0	0	0	0	sp|Q9TUM6|PLIN2_BOVIN	136	147
GYLEQLLR	0	0	0	0	0	0	sp|P02662|CASA1_BOVIN	108	115
GYLEQLLRL	0	0	0	0	0	0	sp|P02662|CASA1_BOVIN	108	116
GYLEQLLRLK	0	0	0	0	0	0	sp|P02662|CASA1_BOVIN	108	117
GYLEQLLRLKK	0	0	0	0	0	0	sp|P02662|CASA1_BOVIN	108	118
GYLEQLLRLKKY	0	0	0	0	0	0	sp|P02662|CASA1_BOVIN	108	119
GYLEQLLRLKKYK	0	0	0	0	0	0	sp|P02662|CASA1_BOVIN	108	120
GYLEQLLRLKKYKVPQ	0	0	0	0	0	0	sp|P02662|CASA1_BOVIN	108	123
GYLEQLLRLKKYKVPQLEIVPN	0	0	0	0	0	0	sp|P02662|CASA1_BOVIN	108	129
GYLEQLLRLKKYKVPQLEIVPN	0	0	0	0	0	1	sp|P02662|CASA1_BOVIN	108	129
GYLEQLLRLKKYKVPQLEIVPNSAE	0	1	0	0	0	0	sp|P02662|CASA1_BOVIN	108	132
GYLEQLLRLKKYKVPQLEIVPNSAEERL	0	1	0	0	0	0	sp|P02662|CASA1_BOVIN	108	135
GYLEQLLRLKKYKVPQLEIVPNSAEERLH	0	1	0	0	0	0	sp|P02662|CASA1_BOVIN	108	136
GYLEQLLRLKKYKVPQLEIVPNSAEERLHSM	0	1	0	0	0	0	sp|P02662|CASA1_BOVIN	108	138
GYLEQLLRLKKYKVPQLEIVPNSAEERLHSMK	0	1	0	0	0	0	sp|P02662|CASA1_BOVIN	108	139
HIQKEDMRLHRLPSRWSSR	0	0	0	0	0	0	sp|A6QP75|AL2CL_BOVIN	932	950
HIQKEDVPS	0	0	0	0	0	0	sp|P02662|CASA1_BOVIN	95	103
HIQKEDVPS	0	0	0	0	0	1	sp|P02662|CASA1_BOVIN	95	103
HIQKEDVPSE	0	0	0	0	0	0	sp|P02662|CASA1_BOVIN	95	104
HIQKEDVPSE	0	0	0	0	0	1	sp|P02662|CASA1_BOVIN	95	104
HIQKEDVPSER	0	0	0	0	0	0	sp|P02662|CASA1_BOVIN	95	105
HIQKEDVPSER	0	0	0	0	0	1	sp|P02662|CASA1_BOVIN	95	105
HIQKEDVPSERY	0	0	0	0	0	0	sp|P02662|CASA1_BOVIN	95	106
HIQKEDVPSERYL	0	0	0	0	0	0	sp|P02662|CASA1_BOVIN	95	107
HIQKEDVPSERYL	0	1	0	0	0	0	sp|P02662|CASA1_BOVIN	95	107
HIQKEDVPSERYL	0	0	0	0	0	1	sp|P02662|CASA1_BOVIN	95	107
HIQKEDVPSERYLG	0	0	0	0	0	0	sp|P02662|CASA1_BOVIN	95	108
HIQKEDVPSERYLG	0	0	0	0	0	1	sp|P02662|CASA1_BOVIN	95	108
HIQKEDVPSERYLGY	0	0	0	0	0	0	sp|P02662|CASA1_BOVIN	95	109
HIQKEDVPSERYLGYL	0	0	0	0	0	0	sp|P02662|CASA1_BOVIN	95	110
HIQKEDVPSERYLGYLE	0	0	0	0	0	0	sp|P02662|CASA1_BOVIN	95	111
HIQKEDVPSERYLGYLEQ	0	0	0	0	0	0	sp|P02662|CASA1_BOVIN	95	112
HIQKEDVPSERYLGYLEQL	0	0	0	0	0	0	sp|P02662|CASA1_BOVIN	95	113
HIQKEDVPSERYLGYLEQL	0	0	0	0	0	1	sp|P02662|CASA1_BOVIN	95	113
HIQKEDVPSERYLGYLEQLL	0	0	0	0	0	1	sp|P02662|CASA1_BOVIN	95	114
HIQKEDVPSERYLGYLEQLL	0	0	0	0	0	0	sp|P02662|CASA1_BOVIN	95	114
HIQKEDVPSERYLGYLEQLLR	0	0	0	0	0	0	sp|P02662|CASA1_BOVIN	95	115
HIQKEDVPSERYLGYLEQLLRL	0	0	0	0	0	0	sp|P02662|CASA1_BOVIN	95	116
HIQKEDVPSERYLGYLEQLLRL	0	0	0	0	0	1	sp|P02662|CASA1_BOVIN	95	116
HIQKEDVPSERYLGYLEQLLRLK	0	0	0	0	0	0	sp|P02662|CASA1_BOVIN	95	117
HIQKEDVPSERYLGYLEQLLRLKK	0	0	0	0	0	0	sp|P02662|CASA1_BOVIN	95	118
HIQKEDVPSERYLGYLEQLLRLKK	0	0	0	0	0	1	sp|P02662|CASA1_BOVIN	95	118
HIQKEDVPSERYLGYLEQLLRLKKY	0	0	0	0	0	1	sp|P02662|CASA1_BOVIN	95	119
HIQKEDVPSERYLGYLEQLLRLKKY	0	0	0	0	0	0	sp|P02662|CASA1_BOVIN	95	119
HIQKEDVPSERYLGYLEQLLRLKKYK	0	0	0	0	0	1	sp|P02662|CASA1_BOVIN	95	120
HIQKEDVPSERYLGYLEQLLRLKKYKVPQL	0	0	0	0	0	1	sp|P02662|CASA1_BOVIN	95	124
HIQKEDVPSERYLGYLEQLLRLKKYKVPQLEIVPN	0	0	0	0	0	1	sp|P02662|CASA1_BOVIN	95	129
HKEMPFP	0	0	0	0	0	0	sp|P02666|CASB_BOVIN	121	127
HKEMPFPK	0	0	1	0	0	0	sp|P02666|CASB_BOVIN	121	128
HKEMPFPK	0	0	0	0	0	0	sp|P02666|CASB_BOVIN	121	128
HKEMPFPKYP	0	0	0	0	0	0	sp|P02666|CASB_BOVIN	121	130
HKEMPFPKYPV	0	0	0	0	0	0	sp|P02666|CASB_BOVIN	121	131
HKEMPFPKYPVE	0	0	0	0	0	0	sp|P02666|CASB_BOVIN	121	132
HKEMPFPKYPVEP	0	0	0	0	0	0	sp|P02666|CASB_BOVIN	121	133
HKEMPFPKYPVEPF	0	0	1	0	0	0	sp|P02666|CASB_BOVIN	121	134
HKEMPFPKYPVEPF	0	0	0	0	0	0	sp|P02666|CASB_BOVIN	121	134
HKEMPFPKYPVEPFT	0	0	0	0	0	0	sp|P02666|CASB_BOVIN	121	135
HKEMPFPKYPVEPFTE	0	0	0	0	0	0	sp|P02666|CASB_BOVIN	121	136
HKEMPFPKYPVEPFTESQ	0	0	0	0	0	0	sp|P02666|CASB_BOVIN	121	138
HKEMPFPKYPVEPFTESQ	0	0	1	0	0	0	sp|P02666|CASB_BOVIN	121	138
HKEMPFPKYPVEPFTESQ	0	0	0	0	0	1	sp|P02666|CASB_BOVIN	121	138
HKEMPFPKYPVEPFTESQS	0	0	0	0	0	0	sp|P02666|CASB_BOVIN	121	139
HKEMPFPKYPVEPFTESQS	0	0	0	0	0	1	sp|P02666|CASB_BOVIN	121	139
HKEMPFPKYPVEPFTESQSL	0	0	1	0	0	0	sp|P02666|CASB_BOVIN	121	140
HKEMPFPKYPVEPFTESQSL	0	0	0	0	0	0	sp|P02666|CASB_BOVIN	121	140
HKEMPFPKYPVEPFTESQSL	0	0	0	0	0	1	sp|P02666|CASB_BOVIN	121	140
HKEMPFPKYPVEPFTESQSLT	0	0	0	0	0	0	sp|P02666|CASB_BOVIN	121	141
HKEMPFPKYPVEPFTESQSLT	0	0	0	0	0	1	sp|P02666|CASB_BOVIN	121	141
HKEMPFPKYPVEPFTESQSLTL	0	0	0	0	0	0	sp|P02666|CASB_BOVIN	121	142
HKEMPFPKYPVEPFTESQSLTL	0	2	0	0	0	0	sp|P02666|CASB_BOVIN	121	142
HKEMPFPKYPVEPFTESQSLTLT	0	0	0	0	0	0	sp|P02666|CASB_BOVIN	121	143
HKEMPFPKYPVEPFTESQSLTLT	0	0	0	0	0	1	sp|P02666|CASB_BOVIN	121	143
HKEMPFPKYPVEPFTESQSLTLTD	0	0	0	0	0	0	sp|P02666|CASB_BOVIN	121	144
HKEMPFPKYPVEPFTESQSLTLTD	0	0	0	0	0	1	sp|P02666|CASB_BOVIN	121	144
HKEMPFPKYPVEPFTESQSLTLTDVEN	0	0	0	0	0	1	sp|P02666|CASB_BOVIN	121	147
HKEMPFPKYPVEPFTESQSLTLTDVEN	0	0	0	0	0	2	sp|P02666|CASB_BOVIN	121	147
HKEMPFPKYPVEPFTESQSLTLTDVENL	0	0	0	0	0	1	sp|P02666|CASB_BOVIN	121	148
HKEMPFPKYPVEPFTESQSLTLTDVENL	0	0	0	0	0	0	sp|P02666|CASB_BOVIN	121	148
HKEMPFPKYPVEPFTESQSLTLTDVENL	0	0	0	0	0	2	sp|P02666|CASB_BOVIN	121	148
HKEMPFPKYPVEPFTESQSLTLTDVENLHLP	0	0	0	0	0	1	sp|P02666|CASB_BOVIN	121	151
HKEMPFPKYPVEPFTESQSLTLTDVENLHLPL	0	0	0	0	0	1	sp|P02666|CASB_BOVIN	121	152
HKEMPFPKYPVEPFTESQSLTLTDVENLHLPLP	0	0	1	0	0	0	sp|P02666|CASB_BOVIN	121	153
HKEMPFPKYPVEPFTESQSLTLTDVENLHLPLP	0	0	0	0	0	0	sp|P02666|CASB_BOVIN	121	153
HKEMPFPKYPVEPFTESQSLTLTDVENLHLPLPL	0	0	0	0	0	1	sp|P02666|CASB_BOVIN	121	154
HKEMPFPKYPVEPFTESQSLTLTDVENLHLPLPL	0	0	0	0	0	0	sp|P02666|CASB_BOVIN	121	154
HKEMPFPKYPVEPFTESQSLTLTDVENLHLPLPLL	0	0	0	0	0	2	sp|P02666|CASB_BOVIN	121	155
HKEMPFPKYPVEPFTESQSLTLTDVENLHLPLPLL	0	0	0	0	0	1	sp|P02666|CASB_BOVIN	121	155
HKEMPFPKYPVEPFTESQSLTLTDVENLHLPLPLLQ	0	0	0	0	0	2	sp|P02666|CASB_BOVIN	121	156
HKEMPFPKYPVEPFTESQSLTLTDVENLHLPLPLLQ	0	0	0	0	0	1	sp|P02666|CASB_BOVIN	121	156
HKEMPFPKYPVEPFTESQSLTLTDVENLHLPLPLLQS	0	0	0	0	0	1	sp|P02666|CASB_BOVIN	121	157
HKEMPFPKYPVEPFTESQSLTLTDVENLHLPLPLLQS	0	0	0	0	0	2	sp|P02666|CASB_BOVIN	121	157
HKEMPFPKYPVEPFTESQSLTLTDVENLHLPLPLLQSW	0	0	0	0	0	1	sp|P02666|CASB_BOVIN	121	158
HKEMPFPKYPVEPFTESQSLTLTDVENLHLPLPLLQSW	0	0	0	0	0	0	sp|P02666|CASB_BOVIN	121	158
HKEMPFPKYPVEPFTESQSLTLTDVENLHLPLPLLQSWM	0	0	0	0	0	2	sp|P02666|CASB_BOVIN	121	159
HLPLPLLQ	0	0	0	0	0	0	sp|P02666|CASB_BOVIN	149	156
HLPLPLLQS	0	0	0	0	0	0	sp|P02666|CASB_BOVIN	149	157
HLPLPLLQSW	0	0	0	0	0	0	sp|P02666|CASB_BOVIN	149	158
HLPLPLLQSWM	0	0	1	0	0	0	sp|P02666|CASB_BOVIN	149	159
HLPLPLLQSWM	0	0	0	0	0	0	sp|P02666|CASB_BOVIN	149	159
HLPLPLLQSWMHQPHQPLPPT	0	0	0	0	0	1	sp|P02666|CASB_BOVIN	149	169
HLPLPLLQSWMHQPHQPLPPTVMFPPQ	0	0	0	0	0	1	sp|P02666|CASB_BOVIN	149	175
HLPLPLLQSWMHQPHQPLPPTVMFPPQSV	0	0	0	0	0	1	sp|P02666|CASB_BOVIN	149	177
HLPLPLLQSWMHQPHQPLPPTVMFPPQSVL	0	0	0	0	0	1	sp|P02666|CASB_BOVIN	149	178
HPHPHLSF	0	0	0	0	0	0	sp|P02668|CASK_BOVIN	119	126
HPIKHQ	0	0	0	0	0	0	sp|P02662|CASA1_BOVIN	19	24
HPIKHQGLPQ	0	0	0	0	0	0	sp|P02662|CASA1_BOVIN	19	28
HPIKHQGLPQ	0	0	0	0	0	1	sp|P02662|CASA1_BOVIN	19	28
HPIKHQGLPQE	0	0	0	0	0	0	sp|P02662|CASA1_BOVIN	19	29
HPIKHQGLPQEVLNENLL	0	0	0	0	0	0	sp|P02662|CASA1_BOVIN	19	36
HPIKHQGLPQEVLNENLLR	0	0	0	0	0	1	sp|P02662|CASA1_BOVIN	19	37
HPIKHQGLPQEVLNENLLR	0	0	0	0	0	0	sp|P02662|CASA1_BOVIN	19	37
HQGLPQE	0	0	0	0	0	0	sp|P02662|CASA1_BOVIN	23	29
HQGLPQEV	0	0	0	0	0	0	sp|P02662|CASA1_BOVIN	23	30
HQGLPQEVL	0	0	0	0	0	0	sp|P02662|CASA1_BOVIN	23	31
HQGLPQEVLN	0	0	0	0	0	0	sp|P02662|CASA1_BOVIN	23	32
HQGLPQEVLNENLL	0	0	0	0	0	0	sp|P02662|CASA1_BOVIN	23	36
HQGLPQEVLNENLLR	0	0	0	0	0	0	sp|P02662|CASA1_BOVIN	23	37
HQGLPQEVLNENLLRF	0	0	0	0	0	0	sp|P02662|CASA1_BOVIN	23	38
HQGLPQEVLNENLLRF	0	0	0	0	0	1	sp|P02662|CASA1_BOVIN	23	38
HQKAMKPW	0	0	0	0	0	0	sp|P02663|CASA2_BOVIN	201	208
HQKAMKPW	0	0	1	0	0	0	sp|P02663|CASA2_BOVIN	201	208
HQKAMKPWIQPK	0	0	0	0	0	0	sp|P02663|CASA2_BOVIN	201	212
HQPHQPLPP	0	0	0	0	0	0	sp|P02666|CASB_BOVIN	160	168
HQPHQPLPPT	0	0	0	0	0	0	sp|P02666|CASB_BOVIN	160	169
HQPHQPLPPTV	0	0	0	0	0	0	sp|P02666|CASB_BOVIN	160	170
HQPHQPLPPTVM	0	0	0	0	0	0	sp|P02666|CASB_BOVIN	160	171
HQPHQPLPPTVMF	0	0	0	0	0	0	sp|P02666|CASB_BOVIN	160	172
HQPHQPLPPTVMFPPQ	0	0	1	0	0	0	sp|P02666|CASB_BOVIN	160	175
HQPHQPLPPTVMFPPQ	0	0	0	0	0	0	sp|P02666|CASB_BOVIN	160	175
HQPHQPLPPTVMFPPQS	0	0	0	0	0	0	sp|P02666|CASB_BOVIN	160	176
HQPHQPLPPTVMFPPQSV	0	0	0	0	0	0	sp|P02666|CASB_BOVIN	160	177
HQPHQPLPPTVMFPPQSVL	0	0	0	0	0	0	sp|P02666|CASB_BOVIN	160	178
HQPHQPLPPTVMFPPQSVL	0	0	0	0	0	1	sp|P02666|CASB_BOVIN	160	178
HQPHQPLPPTVMFPPQSVLS	0	3	0	0	0	0	sp|P02666|CASB_BOVIN	160	179
HQPHQPLPPTVMFPPQSVLSL	0	0	0	0	0	0	sp|P02666|CASB_BOVIN	160	180
HQPHQPLPPTVMFPPQSVLSLSQSK	0	0	0	0	0	0	sp|P02666|CASB_BOVIN	160	184
HQPHQPLPPTVMFPPQSVLSLSQSKVLPVPQ	0	0	0	0	0	1	sp|P02666|CASB_BOVIN	160	190
HQPHQPLPPTVMFPPQSVLSLSQSKVLPVPQ	0	0	0	0	0	0	sp|P02666|CASB_BOVIN	160	190
HQPLPPT	0	0	0	0	0	0	sp|P02666|CASB_BOVIN	163	169
HQPLPPTVMFPPQ	0	0	0	0	0	0	sp|P02666|CASB_BOVIN	163	175
HSKLIPLQPSQGVP	0	0	0	0	0	0	sp|P18892|BT1A1_BOVIN	513	526
HSMKEGIHA	0	0	1	0	0	0	sp|P02662|CASA1_BOVIN	136	144
HSMKEGIHA	0	0	0	0	0	0	sp|P02662|CASA1_BOVIN	136	144
HSMKEGIHAQ	0	0	0	0	0	0	sp|P02662|CASA1_BOVIN	136	145
HSMKEGIHAQ	0	0	1	0	0	0	sp|P02662|CASA1_BOVIN	136	145
HSMKEGIHAQ	0	0	0	0	0	1	sp|P02662|CASA1_BOVIN	136	145
HSMKEGIHAQQKEPM	0	0	0	0	0	0	sp|P02662|CASA1_BOVIN	136	150
HSMKEGIHAQQKEPMIGVN	0	0	0	0	0	0	sp|P02662|CASA1_BOVIN	136	154
HSMKEGIHAQQKEPMIGVNQEL	0	0	0	0	0	0	sp|P02662|CASA1_BOVIN	136	157
HSMKEGIHAQQKEPMIGVNQEL	0	0	0	0	0	1	sp|P02662|CASA1_BOVIN	136	157
HSMKEGIHAQQKEPMIGVNQELA	0	0	0	0	0	1	sp|P02662|CASA1_BOVIN	136	158
HSMKEGIHAQQKEPMIGVNQELA	0	0	0	0	0	0	sp|P02662|CASA1_BOVIN	136	158
HSMKEGIHAQQKEPMIGVNQELAY	0	0	0	0	0	0	sp|P02662|CASA1_BOVIN	136	159
HSMKEGIHAQQKEPMIGVNQELAYFYPE	0	0	0	0	0	1	sp|P02662|CASA1_BOVIN	136	163
HSMKEGIHAQQKEPMIGVNQELAYFYPELFRQ	0	0	0	0	0	1	sp|P02662|CASA1_BOVIN	136	167
HSMKEGIHAQQKEPMIGVNQELAYFYPELFRQ	0	0	0	0	0	2	sp|P02662|CASA1_BOVIN	136	167
HSMKEGIHAQQKEPMIGVNQELAYFYPELFRQF	0	0	0	0	0	2	sp|P02662|CASA1_BOVIN	136	168
HYQKALNEIN	0	0	0	0	0	0	sp|P02663|CASA2_BOVIN	92	101
IAAIMQQGDTSIKPI	0	0	0	0	0	0	tr|Q0VCV0|Q0VCV0_BOVIN	10	24
IEELSLVASPT	0	0	0	0	0	0	tr|F1MFK1|F1MFK1_BOVIN	293	303
IEKFQSEEQQ	0	0	0	0	0	0	sp|P02666|CASB_BOVIN	45	54
IEKFQSEEQQQ	0	0	0	0	0	0	sp|P02666|CASB_BOVIN	45	55
IEKFQSEEQQQ	0	1	0	0	0	0	sp|P02666|CASB_BOVIN	45	55
IEKFQSEEQQQT	0	1	0	0	0	0	sp|P02666|CASB_BOVIN	45	56
IEKFQSEEQQQTE	0	1	0	0	0	0	sp|P02666|CASB_BOVIN	45	57
IEKFQSEEQQQTED	0	1	0	0	0	0	sp|P02666|CASB_BOVIN	45	58
IEKFQSEEQQQTEDEL	0	1	0	0	0	0	sp|P02666|CASB_BOVIN	45	60
IEKFQSEEQQQTEDELQ	0	1	0	0	0	0	sp|P02666|CASB_BOVIN	45	61
IEKFQSEEQQQTEDELQD	0	1	0	0	0	0	sp|P02666|CASB_BOVIN	45	62
IEKFQSEEQQQTEDELQDK	0	1	0	0	0	0	sp|P02666|CASB_BOVIN	45	63
IEKFQSEEQQQTEDELQDKIH	0	1	0	0	0	0	sp|P02666|CASB_BOVIN	45	65
IEKFQSEEQQQTEDELQDKIHPF	0	1	0	0	0	0	sp|P02666|CASB_BOVIN	45	67
IEKFQSEEQQQTEDELQDKIHPF	0	0	0	0	0	0	sp|P02666|CASB_BOVIN	45	67
IEKFQSEEQQQTEDELQDKIHPF	0	0	0	0	0	1	sp|P02666|CASB_BOVIN	45	67
IEKFQSEEQQQTEDELQDKIHPFA	0	1	0	0	0	0	sp|P02666|CASB_BOVIN	45	68
IEKFQSEEQQQTEDELQDKIHPFAQ	0	1	0	0	0	0	sp|P02666|CASB_BOVIN	45	69
IEKFQSEEQQQTEDELQDKIHPFAQT	0	1	0	0	0	0	sp|P02666|CASB_BOVIN	45	70
IEKFQSEEQQQTEDELQDKIHPFAQTQ	0	0	0	0	0	0	sp|P02666|CASB_BOVIN	45	71
IEKFQSEEQQQTEDELQDKIHPFAQTQ	0	1	0	0	0	0	sp|P02666|CASB_BOVIN	45	71
IEKFQSEEQQQTEDELQDKIHPFAQTQ	0	0	0	0	0	1	sp|P02666|CASB_BOVIN	45	71
IEKFQSEEQQQTEDELQDKIHPFAQTQS	0	1	0	0	0	0	sp|P02666|CASB_BOVIN	45	72
IEKFQSEEQQQTEDELQDKIHPFAQTQSL	0	1	0	0	0	0	sp|P02666|CASB_BOVIN	45	73
IHPFAQTQ	0	0	0	0	0	0	sp|P02666|CASB_BOVIN	64	71
IHPFAQTQSL	0	0	0	0	0	0	sp|P02666|CASB_BOVIN	64	73
IHPFAQTQSLVYPFPGPIPNSLPQ	0	0	0	0	0	0	sp|P02666|CASB_BOVIN	64	87
IHPFAQTQSLVYPFPGPIPNSLPQNIPPL	0	0	0	0	0	0	sp|P02666|CASB_BOVIN	64	92
IHPFAQTQSLVYPFPGPIPNSLPQNIPPL	0	0	0	0	0	1	sp|P02666|CASB_BOVIN	64	92
IHPFAQTQSLVYPFPGPIPNSLPQNIPPLTQTPV	0	0	0	0	0	0	sp|P02666|CASB_BOVIN	64	97
IISQETYKQEK	0	1	0	0	0	0	sp|P02663|CASA2_BOVIN	29	39
IKHQGLPQEVLNENLL	0	0	0	0	0	0	sp|P02662|CASA1_BOVIN	21	36
ILNKPEDETH	0	0	0	0	0	0	sp|P80195|GLCM1_BOVIN	19	28
ILNKPEDETHL	0	0	0	0	0	0	sp|P80195|GLCM1_BOVIN	19	29
ILNKPEDETHLE	0	0	0	0	0	0	sp|P80195|GLCM1_BOVIN	19	30
INKKIEKFQSEE	0	1	0	0	0	0	sp|P02666|CASB_BOVIN	41	52
INKKIEKFQSEEQQ	0	1	0	0	0	0	sp|P02666|CASB_BOVIN	41	54
INKKIEKFQSEEQQQ	0	1	0	0	0	0	sp|P02666|CASB_BOVIN	41	55
INKKIEKFQSEEQQQT	0	1	0	0	0	0	sp|P02666|CASB_BOVIN	41	56
INKKIEKFQSEEQQQTED	0	1	0	0	0	0	sp|P02666|CASB_BOVIN	41	58
INKKIEKFQSEEQQQTEDEL	0	1	0	0	0	0	sp|P02666|CASB_BOVIN	41	60
INKKIEKFQSEEQQQTEDELQ	0	1	0	0	0	0	sp|P02666|CASB_BOVIN	41	61
INKKIEKFQSEEQQQTEDELQDK	0	1	0	0	0	0	sp|P02666|CASB_BOVIN	41	63
INKKIEKFQSEEQQQTEDELQDKIHPF	0	1	0	0	0	0	sp|P02666|CASB_BOVIN	41	67
INKKIEKFQSEEQQQTEDELQDKIHPF	0	0	0	0	0	1	sp|P02666|CASB_BOVIN	41	67
INKKIEKFQSEEQQQTEDELQDKIHPFAQTQ	0	1	0	0	0	0	sp|P02666|CASB_BOVIN	41	71
INNILNEVEVGDIIIESLDIITITVPPA	0	0	0	0	0	0	tr|E1BG26|E1BG26_BOVIN	430	457
INNQFLPYPYYAKPA	0	0	0	0	0	0	sp|P02668|CASK_BOVIN	72	86
IPNPIGSENSEK	0	0	0	0	0	0	sp|P02662|CASA1_BOVIN	197	208
IPNPIGSENSEKT	0	0	0	0	0	0	sp|P02662|CASA1_BOVIN	197	209
IPNPIGSENSEKTTMPLW	0	0	0	0	0	0	sp|P02662|CASA1_BOVIN	197	214
IPNPIGSENSEKTTMPLW	0	0	0	0	0	1	sp|P02662|CASA1_BOVIN	197	214
IPPLTQTPVVVPP	0	0	0	0	0	0	sp|P02666|CASB_BOVIN	89	101
IPPLTQTPVVVPPF	0	0	0	0	0	0	sp|P02666|CASB_BOVIN	89	102
IPPLTQTPVVVPPFLQPE	0	0	0	0	0	0	sp|P02666|CASB_BOVIN	89	106
IPPLTQTPVVVPPFLQPEVMG	0	0	0	0	0	0	sp|P02666|CASB_BOVIN	89	109
IQKEDVPSE	0	0	0	0	0	0	sp|P02662|CASA1_BOVIN	96	104
IQKEDVPSER	0	0	0	0	0	0	sp|P02662|CASA1_BOVIN	96	105
IQKEDVPSER	0	0	0	0	0	1	sp|P02662|CASA1_BOVIN	96	105
IQKEDVPSERY	0	0	0	0	0	0	sp|P02662|CASA1_BOVIN	96	106
IQKEDVPSERYL	0	0	0	0	0	0	sp|P02662|CASA1_BOVIN	96	107
IQKEDVPSERYLG	0	0	0	0	0	0	sp|P02662|CASA1_BOVIN	96	108
IQKEDVPSERYLGYL	0	0	0	0	0	0	sp|P02662|CASA1_BOVIN	96	110
IQKEDVPSERYLGYLEQL	0	0	0	0	0	0	sp|P02662|CASA1_BOVIN	96	113
IQKEDVPSERYLGYLEQLLRL	0	0	0	0	0	0	sp|P02662|CASA1_BOVIN	96	116
IQKEDVPSERYLGYLEQLLRLK	0	0	0	0	0	0	sp|P02662|CASA1_BOVIN	96	117
IQPKTKVIPYVR	0	0	0	0	0	0	sp|P02663|CASA2_BOVIN	209	220
IQPKTKVIPYVR	0	0	0	0	0	1	sp|P02663|CASA2_BOVIN	209	220
ISKEQIVIR	0	1	0	0	0	0	sp|P80195|GLCM1_BOVIN	63	71
ISQETYK	0	1	0	0	0	0	sp|P02663|CASA2_BOVIN	30	36
ISQRYQKF	0	0	0	0	0	0	sp|P02663|CASA2_BOVIN	182	189
ITVDDKHY	0	0	0	0	0	0	sp|P02663|CASA2_BOVIN	86	93
ITVDDKHYQ	0	0	0	0	0	0	sp|P02663|CASA2_BOVIN	86	94
ITVDDKHYQK	0	0	0	0	0	0	sp|P02663|CASA2_BOVIN	86	95
ITVDDKHYQKA	0	0	0	0	0	0	sp|P02663|CASA2_BOVIN	86	96
ITVDDKHYQKAL	0	0	0	0	0	0	sp|P02663|CASA2_BOVIN	86	97
ITVDDKHYQKALNE	0	0	0	0	0	0	sp|P02663|CASA2_BOVIN	86	99
ITVDDKHYQKALNEIN	0	0	0	0	0	0	sp|P02663|CASA2_BOVIN	86	101
ITVDDKHYQKALNEINQ	0	0	0	0	0	0	sp|P02663|CASA2_BOVIN	86	102
ITVDDKHYQKALNEINQF	0	0	0	0	0	0	sp|P02663|CASA2_BOVIN	86	103
ITVDDKHYQKALNEINQFY	0	0	0	0	0	0	sp|P02663|CASA2_BOVIN	86	104
ITVDDKHYQKALNEINQFY	0	0	0	0	0	1	sp|P02663|CASA2_BOVIN	86	104
ITVDDKHYQKALNEINQFYQ	0	0	0	0	0	0	sp|P02663|CASA2_BOVIN	86	105
ITVDDKHYQKALNEINQFYQKFPQ	0	0	0	0	0	1	sp|P02663|CASA2_BOVIN	86	109
ITVDDKHYQKALNEINQFYQKFPQY	0	0	0	0	0	0	sp|P02663|CASA2_BOVIN	86	110
ITVDDKHYQKALNEINQFYQKFPQY	0	0	0	0	0	1	sp|P02663|CASA2_BOVIN	86	110
ITVDDKHYQKALNEINQFYQKFPQYLQ	0	0	0	0	0	1	sp|P02663|CASA2_BOVIN	86	112
ITVDDKHYQKALNEINQFYQKFPQYLQY	0	0	0	0	0	1	sp|P02663|CASA2_BOVIN	86	113
ITVDDKHYQKALNEINQFYQKFPQYLQY	0	0	0	0	0	0	sp|P02663|CASA2_BOVIN	86	113
IVLNPWDQ	0	0	0	0	0	0	sp|P02663|CASA2_BOVIN	119	126
IVLNPWDQVK	0	0	0	0	0	0	sp|P02663|CASA2_BOVIN	119	128
IVLNPWDQVKR	0	0	0	0	0	0	sp|P02663|CASA2_BOVIN	119	129
IVLNPWDQVKRN	0	0	0	0	0	0	sp|P02663|CASA2_BOVIN	119	130
IVPNSAEER	0	0	0	0	0	0	sp|P02662|CASA1_BOVIN	126	134
IVPNSAEER	0	1	0	0	0	0	sp|P02662|CASA1_BOVIN	126	134
IVPNSAEERL	0	0	0	0	0	0	sp|P02662|CASA1_BOVIN	126	135
IVPNSAEERL	0	1	0	0	0	0	sp|P02662|CASA1_BOVIN	126	135
IVPNSAEERLH	0	0	0	0	0	0	sp|P02662|CASA1_BOVIN	126	136
IVPNSAEERLH	0	1	0	0	0	0	sp|P02662|CASA1_BOVIN	126	136
IVPNSAEERLHSM	0	1	0	0	0	0	sp|P02662|CASA1_BOVIN	126	138
IVPNSAEERLHSMK	0	1	0	0	0	0	sp|P02662|CASA1_BOVIN	126	139
IVPNSAEERLHSMKEGIH	0	1	0	0	0	0	sp|P02662|CASA1_BOVIN	126	143
IVPNSAEERLHSMKEGIHAQ	0	1	0	0	0	0	sp|P02662|CASA1_BOVIN	126	145
KAMKPWIQPK	0	0	1	0	0	0	sp|P02663|CASA2_BOVIN	203	212
KAMKPWIQPK	0	0	0	0	0	0	sp|P02663|CASA2_BOVIN	203	212
KAMKPWIQPKTKVIPY	0	0	0	0	0	0	sp|P02663|CASA2_BOVIN	203	218
KAVPYPQR	0	0	0	0	0	0	sp|P02666|CASB_BOVIN	191	198
KAVPYPQRD	0	0	0	0	0	0	sp|P02666|CASB_BOVIN	191	199
KAVPYPQRDMP	0	0	0	0	0	0	sp|P02666|CASB_BOVIN	191	201
KAVPYPQRDMPI	0	0	0	0	0	0	sp|P02666|CASB_BOVIN	191	202
KAVPYPQRDMPIQ	0	0	1	0	0	0	sp|P02666|CASB_BOVIN	191	203
KAVPYPQRDMPIQ	0	0	0	0	0	0	sp|P02666|CASB_BOVIN	191	203
KAVPYPQRDMPIQA	0	0	1	0	0	0	sp|P02666|CASB_BOVIN	191	204
KAVPYPQRDMPIQA	0	0	0	0	0	0	sp|P02666|CASB_BOVIN	191	204
KAVPYPQRDMPIQA	0	0	0	0	0	1	sp|P02666|CASB_BOVIN	191	204
KAVPYPQRDMPIQAF	0	0	0	0	0	0	sp|P02666|CASB_BOVIN	191	205
KAVPYPQRDMPIQAFL	0	0	0	0	0	0	sp|P02666|CASB_BOVIN	191	206
KAVPYPQRDMPIQAFLL	0	0	1	0	0	0	sp|P02666|CASB_BOVIN	191	207
KAVPYPQRDMPIQAFLL	0	0	0	0	0	0	sp|P02666|CASB_BOVIN	191	207
KAVPYPQRDMPIQAFLL	0	0	0	0	0	1	sp|P02666|CASB_BOVIN	191	207
KAVPYPQRDMPIQAFLLY	0	0	0	0	0	0	sp|P02666|CASB_BOVIN	191	208
KAVPYPQRDMPIQAFLLYQEPVL	0	0	0	0	0	1	sp|P02666|CASB_BOVIN	191	213
KAVPYPQRDMPIQAFLLYQEPVL	0	0	0	0	0	0	sp|P02666|CASB_BOVIN	191	213
KAVPYPQRDMPIQAFLLYQEPVLGPV	0	0	0	0	0	1	sp|P02666|CASB_BOVIN	191	216
KAVPYPQRDMPIQAFLLYQEPVLGPV	0	0	0	0	0	0	sp|P02666|CASB_BOVIN	191	216
KAVPYPQRDMPIQAFLLYQEPVLGPVRGP	0	0	0	0	0	1	sp|P02666|CASB_BOVIN	191	219
KAVPYPQRDMPIQAFLLYQEPVLGPVRGPFP	0	0	0	0	0	1	sp|P02666|CASB_BOVIN	191	221
KAVPYPQRDMPIQAFLLYQEPVLGPVRGPFPII	0	0	0	0	0	0	sp|P02666|CASB_BOVIN	191	223
KAVPYPQRDMPIQAFLLYQEPVLGPVRGPFPII	0	0	0	0	0	1	sp|P02666|CASB_BOVIN	191	223
KAVPYPQRDMPIQAFLLYQEPVLGPVRGPFPIIV	0	0	0	0	0	1	sp|P02666|CASB_BOVIN	191	224
KAVPYPQRDMPIQAFLLYQEPVLGPVRGPFPIIV	0	0	0	0	0	0	sp|P02666|CASB_BOVIN	191	224
KDIGSESTEDQAM	0	1	0	0	0	0	sp|P02662|CASA1_BOVIN	57	69
KDIGSESTEDQAME	0	2	0	0	0	0	sp|P02662|CASA1_BOVIN	57	70
KDIGSESTEDQAMEDIK	0	2	0	0	0	0	sp|P02662|CASA1_BOVIN	57	73
KDIGSESTEDQAMEDIKQM	0	2	0	0	0	0	sp|P02662|CASA1_BOVIN	57	75
KDPTQAFVPRTVMIGGKAA	0	0	1	0	0	0	sp|Q3B7M9|PYGB_BOVIN	593	611
KEAMAPKHKEMPFPKYPVEPF	0	0	0	0	0	0	sp|P02666|CASB_BOVIN	114	134
KEDVPSER	0	0	0	0	0	0	sp|P02662|CASA1_BOVIN	98	105
KEDVPSERY	0	0	0	0	0	0	sp|P02662|CASA1_BOVIN	98	106
KEDVPSERYL	0	0	0	0	0	0	sp|P02662|CASA1_BOVIN	98	107
KEDVPSERYLG	0	0	0	0	0	0	sp|P02662|CASA1_BOVIN	98	108
KEDVPSERYLGY	0	0	0	0	0	0	sp|P02662|CASA1_BOVIN	98	109
KEDVPSERYLGYL	0	0	0	0	0	0	sp|P02662|CASA1_BOVIN	98	110
KEDVPSERYLGYLEQ	0	0	0	0	0	0	sp|P02662|CASA1_BOVIN	98	112
KEDVPSERYLGYLEQLLRL	0	0	0	0	0	0	sp|P02662|CASA1_BOVIN	98	116
KEDVPSERYLGYLEQLLRLK	0	0	0	0	0	0	sp|P02662|CASA1_BOVIN	98	117
KEDVPSERYLGYLEQLLRLKK	0	0	0	0	0	0	sp|P02662|CASA1_BOVIN	98	118
KEGIHAQQKEPMIGV	0	0	0	0	0	0	sp|P02662|CASA1_BOVIN	139	153
KEGIHAQQKEPMIGVN	0	0	1	0	0	0	sp|P02662|CASA1_BOVIN	139	154
KEGIHAQQKEPMIGVN	0	0	0	0	0	0	sp|P02662|CASA1_BOVIN	139	154
KEGIHAQQKEPMIGVNQ	0	0	0	0	0	0	sp|P02662|CASA1_BOVIN	139	155
KEGIHAQQKEPMIGVNQEL	0	0	0	0	0	0	sp|P02662|CASA1_BOVIN	139	157
KEGIHAQQKEPMIGVNQELA	0	0	1	0	0	0	sp|P02662|CASA1_BOVIN	139	158
KEGIHAQQKEPMIGVNQELA	0	0	0	0	0	0	sp|P02662|CASA1_BOVIN	139	158
KEGIHAQQKEPMIGVNQELAY	0	0	1	0	0	0	sp|P02662|CASA1_BOVIN	139	159
KEGIHAQQKEPMIGVNQELAY	0	0	0	0	0	0	sp|P02662|CASA1_BOVIN	139	159
KEGIHAQQKEPMIGVNQELAYFYPE	0	0	0	0	0	0	sp|P02662|CASA1_BOVIN	139	163
KEGIHAQQKEPMIGVNQELAYFYPELFR	0	0	0	0	0	1	sp|P02662|CASA1_BOVIN	139	166
KEGIHAQQKEPMIGVNQELAYFYPELFR	0	0	0	0	0	0	sp|P02662|CASA1_BOVIN	139	166
KEGIHAQQKEPMIGVNQELAYFYPELFRQ	0	0	1	0	0	0	sp|P02662|CASA1_BOVIN	139	167
KEGIHAQQKEPMIGVNQELAYFYPELFRQ	0	0	0	0	0	1	sp|P02662|CASA1_BOVIN	139	167
KEGIHAQQKEPMIGVNQELAYFYPELFRQ	0	0	0	0	0	0	sp|P02662|CASA1_BOVIN	139	167
KEGIHAQQKEPMIGVNQELAYFYPELFRQF	0	0	0	0	0	1	sp|P02662|CASA1_BOVIN	139	168
KEGIHAQQKEPMIGVNQELAYFYPELFRQFYQL	0	0	0	0	0	1	sp|P02662|CASA1_BOVIN	139	171
KEGIHAQQKEPMIGVNQELAYFYPELFRQFYQL	0	0	0	0	0	0	sp|P02662|CASA1_BOVIN	139	171
KEGIHAQQKEPMIGVNQELAYFYPELFRQFYQLD	0	0	0	0	0	1	sp|P02662|CASA1_BOVIN	139	172
KEGIHAQQKEPMIGVNQELAYFYPELFRQFYQLDAYPS	0	0	0	0	0	1	sp|P02662|CASA1_BOVIN	139	176
KEGIHAQQKEPMIGVNQELAYFYPELFRQFYQLDAYPS	0	0	0	0	0	2	sp|P02662|CASA1_BOVIN	139	176
KEKVNELSKDIGSESTEDQAMEDIK	0	3	0	0	0	0	sp|P02662|CASA1_BOVIN	49	73
KEKVNELSKDIGSESTEDQAMEDIK	0	2	0	0	0	0	sp|P02662|CASA1_BOVIN	49	73
KEMPFPK	0	0	0	0	0	0	sp|P02666|CASB_BOVIN	122	128
KEMPFPKYP	0	0	0	0	0	0	sp|P02666|CASB_BOVIN	122	130
KEMPFPKYPVEP	0	0	0	0	0	0	sp|P02666|CASB_BOVIN	122	133
KEMPFPKYPVEPF	0	0	1	0	0	0	sp|P02666|CASB_BOVIN	122	134
KEMPFPKYPVEPF	0	0	0	0	0	0	sp|P02666|CASB_BOVIN	122	134
KEMPFPKYPVEPFT	0	0	0	0	0	0	sp|P02666|CASB_BOVIN	122	135
KEMPFPKYPVEPFTESQ	0	0	0	0	0	0	sp|P02666|CASB_BOVIN	122	138
KEMPFPKYPVEPFTESQSLTLTDVENL	0	0	0	0	0	2	sp|P02666|CASB_BOVIN	122	148
KEMPFPKYPVEPFTESQSLTLTDVENLHL	0	0	1	0	0	0	sp|P02666|CASB_BOVIN	122	150
KEMPFPKYPVEPFTESQSLTLTDVENLHL	0	0	0	0	0	1	sp|P02666|CASB_BOVIN	122	150
KEMPFPKYPVEPFTESQSLTLTDVENLHL	0	0	0	0	0	0	sp|P02666|CASB_BOVIN	122	150
KEMPFPKYPVEPFTESQSLTLTDVENLHLP	0	0	1	0	0	0	sp|P02666|CASB_BOVIN	122	151
KEMPFPKYPVEPFTESQSLTLTDVENLHLP	0	0	0	0	0	1	sp|P02666|CASB_BOVIN	122	151
KEMPFPKYPVEPFTESQSLTLTDVENLHLP	0	0	0	0	0	0	sp|P02666|CASB_BOVIN	122	151
KEMPFPKYPVEPFTESQSLTLTDVENLHLPL	0	0	1	0	0	0	sp|P02666|CASB_BOVIN	122	152
KEMPFPKYPVEPFTESQSLTLTDVENLHLPL	0	0	0	0	0	0	sp|P02666|CASB_BOVIN	122	152
KEMPFPKYPVEPFTESQSLTLTDVENLHLPLP	0	0	0	0	0	0	sp|P02666|CASB_BOVIN	122	153
KEMPFPKYPVEPFTESQSLTLTDVENLHLPLP	0	0	0	0	0	2	sp|P02666|CASB_BOVIN	122	153
KEMPFPKYPVEPFTESQSLTLTDVENLHLPLP	0	0	0	0	0	1	sp|P02666|CASB_BOVIN	122	153
KEMPFPKYPVEPFTESQSLTLTDVENLHLPLPL	0	0	0	0	0	0	sp|P02666|CASB_BOVIN	122	154
KEMPFPKYPVEPFTESQSLTLTDVENLHLPLPLL	0	3	0	0	0	0	sp|P02666|CASB_BOVIN	122	155
KEMPFPKYPVEPFTESQSLTLTDVENLHLPLPLLQS	0	0	0	0	0	1	sp|P02666|CASB_BOVIN	122	157
KEMPFPKYPVEPFTESQSLTLTDVENLHLPLPLLQS	0	0	0	0	0	0	sp|P02666|CASB_BOVIN	122	157
KEPMIGVN	0	0	0	0	0	0	sp|P02662|CASA1_BOVIN	147	154
KEPMIGVNQ	0	0	0	0	0	0	sp|P02662|CASA1_BOVIN	147	155
KEPMIGVNQ	0	0	1	0	0	0	sp|P02662|CASA1_BOVIN	147	155
KEPMIGVNQEL	0	0	0	0	0	0	sp|P02662|CASA1_BOVIN	147	157
KEPMIGVNQELA	0	0	0	0	0	0	sp|P02662|CASA1_BOVIN	147	158
KEPMIGVNQELAY	0	0	0	0	0	0	sp|P02662|CASA1_BOVIN	147	159
KEPMIGVNQELAYFYPELFRQ	0	0	0	0	0	0	sp|P02662|CASA1_BOVIN	147	167
KFALPQYL	0	0	0	0	0	0	sp|P02663|CASA2_BOVIN	188	195
KFALPQYLKT	0	0	0	0	0	0	sp|P02663|CASA2_BOVIN	188	197
KFALPQYLKTVYQHQ	0	0	0	0	0	0	sp|P02663|CASA2_BOVIN	188	202
KFPQYLQYLYQGPIVLNPWDQVKR	0	0	0	0	0	0	sp|P02663|CASA2_BOVIN	106	129
KFPQYLQYLYQGPIVLNPWDQVKRN	0	0	0	0	0	1	sp|P02663|CASA2_BOVIN	106	130
KFQSEEQQQTE	0	1	0	0	0	0	sp|P02666|CASB_BOVIN	47	57
KFQSEEQQQTED	0	1	0	0	0	0	sp|P02666|CASB_BOVIN	47	58
KFQSEEQQQTEDEL	0	1	0	0	0	0	sp|P02666|CASB_BOVIN	47	60
KFQSEEQQQTEDELQ	0	0	0	0	0	0	sp|P02666|CASB_BOVIN	47	61
KFQSEEQQQTEDELQ	0	1	0	0	0	0	sp|P02666|CASB_BOVIN	47	61
KFQSEEQQQTEDELQD	0	1	0	0	0	0	sp|P02666|CASB_BOVIN	47	62
KFQSEEQQQTEDELQDK	0	1	0	0	0	0	sp|P02666|CASB_BOVIN	47	63
KFQSEEQQQTEDELQDKIHP	0	1	0	0	0	0	sp|P02666|CASB_BOVIN	47	66
KFQSEEQQQTEDELQDKIHPF	0	1	0	0	0	0	sp|P02666|CASB_BOVIN	47	67
KFQSEEQQQTEDELQDKIHPF	0	0	0	0	0	0	sp|P02666|CASB_BOVIN	47	67
KFQSEEQQQTEDELQDKIHPFA	0	1	0	0	0	0	sp|P02666|CASB_BOVIN	47	68
KFQSEEQQQTEDELQDKIHPFAQ	0	1	0	0	0	0	sp|P02666|CASB_BOVIN	47	69
KFQSEEQQQTEDELQDKIHPFAQT	0	1	0	0	0	0	sp|P02666|CASB_BOVIN	47	70
KFQSEEQQQTEDELQDKIHPFAQTQ	0	1	0	0	0	0	sp|P02666|CASB_BOVIN	47	71
KFQSEEQQQTEDELQDKIHPFAQTQ	0	0	0	0	0	0	sp|P02666|CASB_BOVIN	47	71
KFQSEEQQQTEDELQDKIHPFAQTQS	0	1	0	0	0	0	sp|P02666|CASB_BOVIN	47	72
KFQSEEQQQTEDELQDKIHPFAQTQSL	0	1	0	0	0	0	sp|P02666|CASB_BOVIN	47	73
KHIQKEDVPSER	0	0	0	0	0	0	sp|P02662|CASA1_BOVIN	94	105
KHIQKEDVPSERYL	0	0	0	0	0	0	sp|P02662|CASA1_BOVIN	94	107
KHIQKEDVPSERYLG	0	0	0	0	0	0	sp|P02662|CASA1_BOVIN	94	108
KHKEMPFPKYPVEPF	0	0	0	0	0	0	sp|P02666|CASB_BOVIN	120	134
KHKEMPFPKYPVEPFTESQ	0	0	0	0	0	0	sp|P02666|CASB_BOVIN	120	138
KHPIKHQGLPQEVLN	0	0	0	0	0	0	sp|P02662|CASA1_BOVIN	18	32
KHPIKHQGLPQEVLNENLL	0	0	0	0	0	1	sp|P02662|CASA1_BOVIN	18	36
KHPIKHQGLPQEVLNENLLR	0	0	0	0	0	0	sp|P02662|CASA1_BOVIN	18	37
KHPIKHQGLPQEVLNENLLRF	0	0	0	0	0	1	sp|P02662|CASA1_BOVIN	18	38
KHPKPVPVSNAEGSQPDDSSS	0	0	0	0	0	1	sp|Q9TUM6|PLIN2_BOVIN	430	450
KHQGLPQEVLNENLL	0	0	0	0	0	0	sp|P02662|CASA1_BOVIN	22	36
KIEKFQSEE	0	0	0	0	0	0	sp|P02666|CASB_BOVIN	44	52
KIEKFQSEE	0	1	0	0	0	0	sp|P02666|CASB_BOVIN	44	52
KIEKFQSEEQQ	0	0	0	0	0	0	sp|P02666|CASB_BOVIN	44	54
KIEKFQSEEQQ	0	1	0	0	0	0	sp|P02666|CASB_BOVIN	44	54
KIEKFQSEEQQQ	0	0	0	0	0	0	sp|P02666|CASB_BOVIN	44	55
KIEKFQSEEQQQ	0	1	0	0	0	0	sp|P02666|CASB_BOVIN	44	55
KIEKFQSEEQQQT	0	0	0	0	0	0	sp|P02666|CASB_BOVIN	44	56
KIEKFQSEEQQQT	0	1	0	0	0	0	sp|P02666|CASB_BOVIN	44	56
KIEKFQSEEQQQTE	0	1	0	0	0	0	sp|P02666|CASB_BOVIN	44	57
KIEKFQSEEQQQTED	0	1	0	0	0	0	sp|P02666|CASB_BOVIN	44	58
KIEKFQSEEQQQTED	0	0	0	0	0	0	sp|P02666|CASB_BOVIN	44	58
KIEKFQSEEQQQTEDE	0	1	0	0	0	0	sp|P02666|CASB_BOVIN	44	59
KIEKFQSEEQQQTEDEL	0	0	0	0	0	0	sp|P02666|CASB_BOVIN	44	60
KIEKFQSEEQQQTEDEL	0	1	0	0	0	0	sp|P02666|CASB_BOVIN	44	60
KIEKFQSEEQQQTEDELQ	0	1	0	0	0	0	sp|P02666|CASB_BOVIN	44	61
KIEKFQSEEQQQTEDELQ	0	0	0	0	0	0	sp|P02666|CASB_BOVIN	44	61
KIEKFQSEEQQQTEDELQD	0	0	0	0	0	0	sp|P02666|CASB_BOVIN	44	62
KIEKFQSEEQQQTEDELQD	0	1	0	0	0	0	sp|P02666|CASB_BOVIN	44	62
KIEKFQSEEQQQTEDELQDK	0	1	0	0	0	0	sp|P02666|CASB_BOVIN	44	63
KIEKFQSEEQQQTEDELQDK	0	2	0	0	0	0	sp|P02666|CASB_BOVIN	44	63
KIEKFQSEEQQQTEDELQDK	0	0	0	0	0	0	sp|P02666|CASB_BOVIN	44	63
KIEKFQSEEQQQTEDELQDKIH	0	1	0	0	0	0	sp|P02666|CASB_BOVIN	44	65
KIEKFQSEEQQQTEDELQDKIHP	0	1	0	0	0	0	sp|P02666|CASB_BOVIN	44	66
KIEKFQSEEQQQTEDELQDKIHPF	0	1	0	0	0	0	sp|P02666|CASB_BOVIN	44	67
KIEKFQSEEQQQTEDELQDKIHPF	0	0	0	0	0	0	sp|P02666|CASB_BOVIN	44	67
KIEKFQSEEQQQTEDELQDKIHPF	0	2	0	0	0	0	sp|P02666|CASB_BOVIN	44	67
KIEKFQSEEQQQTEDELQDKIHPFA	0	1	0	0	0	0	sp|P02666|CASB_BOVIN	44	68
KIEKFQSEEQQQTEDELQDKIHPFAQ	0	1	0	0	0	0	sp|P02666|CASB_BOVIN	44	69
KIEKFQSEEQQQTEDELQDKIHPFAQT	0	1	0	0	0	0	sp|P02666|CASB_BOVIN	44	70
KIEKFQSEEQQQTEDELQDKIHPFAQTQ	0	0	0	0	0	1	sp|P02666|CASB_BOVIN	44	71
KIEKFQSEEQQQTEDELQDKIHPFAQTQ	0	1	0	0	0	0	sp|P02666|CASB_BOVIN	44	71
KIEKFQSEEQQQTEDELQDKIHPFAQTQ	0	0	0	0	0	0	sp|P02666|CASB_BOVIN	44	71
KIEKFQSEEQQQTEDELQDKIHPFAQTQS	0	1	0	0	0	0	sp|P02666|CASB_BOVIN	44	72
KIEKFQSEEQQQTEDELQDKIHPFAQTQSL	0	1	0	0	0	0	sp|P02666|CASB_BOVIN	44	73
KIHPFAQTQ	0	0	0	0	0	0	sp|P02666|CASB_BOVIN	63	71
KIHPFAQTQS	0	0	0	0	0	0	sp|P02666|CASB_BOVIN	63	72
KITVDDKHYQKAL	0	0	0	0	0	0	sp|P02663|CASA2_BOVIN	85	97
KKIEKFQSEE	0	1	0	0	0	0	sp|P02666|CASB_BOVIN	43	52
KKIEKFQSEEQ	0	1	0	0	0	0	sp|P02666|CASB_BOVIN	43	53
KKIEKFQSEEQQ	0	0	0	0	0	0	sp|P02666|CASB_BOVIN	43	54
KKIEKFQSEEQQQ	0	1	0	0	0	0	sp|P02666|CASB_BOVIN	43	55
KKIEKFQSEEQQQ	0	0	0	0	0	0	sp|P02666|CASB_BOVIN	43	55
KKIEKFQSEEQQQT	0	1	0	0	0	0	sp|P02666|CASB_BOVIN	43	56
KKIEKFQSEEQQQTE	0	1	0	0	0	0	sp|P02666|CASB_BOVIN	43	57
KKIEKFQSEEQQQTED	0	1	0	0	0	0	sp|P02666|CASB_BOVIN	43	58
KKIEKFQSEEQQQTEDE	0	1	0	0	0	0	sp|P02666|CASB_BOVIN	43	59
KKIEKFQSEEQQQTEDEL	0	1	0	0	0	0	sp|P02666|CASB_BOVIN	43	60
KKIEKFQSEEQQQTEDELQ	0	1	0	0	0	0	sp|P02666|CASB_BOVIN	43	61
KKIEKFQSEEQQQTEDELQ	0	0	0	0	0	1	sp|P02666|CASB_BOVIN	43	61
KKIEKFQSEEQQQTEDELQD	0	1	0	0	0	0	sp|P02666|CASB_BOVIN	43	62
KKIEKFQSEEQQQTEDELQDK	0	1	0	0	0	0	sp|P02666|CASB_BOVIN	43	63
KKIEKFQSEEQQQTEDELQDKIHP	0	1	0	0	0	0	sp|P02666|CASB_BOVIN	43	66
KKIEKFQSEEQQQTEDELQDKIHPF	0	1	0	0	0	0	sp|P02666|CASB_BOVIN	43	67
KKIEKFQSEEQQQTEDELQDKIHPF	0	0	0	0	0	1	sp|P02666|CASB_BOVIN	43	67
KKIEKFQSEEQQQTEDELQDKIHPF	0	0	0	0	0	0	sp|P02666|CASB_BOVIN	43	67
KKIEKFQSEEQQQTEDELQDKIHPFA	0	1	0	0	0	0	sp|P02666|CASB_BOVIN	43	68
KKIEKFQSEEQQQTEDELQDKIHPFAQ	0	1	0	0	0	0	sp|P02666|CASB_BOVIN	43	69
KKIEKFQSEEQQQTEDELQDKIHPFAQTQ	0	0	0	0	0	1	sp|P02666|CASB_BOVIN	43	71
KKIEKFQSEEQQQTEDELQDKIHPFAQTQ	0	1	0	0	0	0	sp|P02666|CASB_BOVIN	43	71
KKIEKFQSEEQQQTEDELQDKIHPFAQTQS	0	1	0	0	0	0	sp|P02666|CASB_BOVIN	43	72
KKTKLTEEEKNRL	0	0	0	0	0	0	sp|P02663|CASA2_BOVIN	164	176
KKTKLTEEEKNRLN	0	0	0	0	0	0	sp|P02663|CASA2_BOVIN	164	177
KKTKLTEEEKNRLNF	0	0	0	0	0	0	sp|P02663|CASA2_BOVIN	164	178
KKTKLTEEEKNRLNFL	0	0	0	0	0	0	sp|P02663|CASA2_BOVIN	164	179
KKTVDMESTE	0	1	0	0	0	0	sp|P02663|CASA2_BOVIN	151	160
KKTVDMESTEVF	0	1	0	0	0	0	sp|P02663|CASA2_BOVIN	151	162
KKTVDMESTEVFTKK	0	1	0	0	0	0	sp|P02663|CASA2_BOVIN	151	165
KKTVDMESTEVFTKKTK	0	1	0	0	0	0	sp|P02663|CASA2_BOVIN	151	167
KKTVDMESTEVFTKKTKLTEEEKNRLN	0	1	0	0	0	0	sp|P02663|CASA2_BOVIN	151	177
KKYKVPQL	0	0	0	0	0	0	sp|P02662|CASA1_BOVIN	117	124
KKYKVPQLEIVPN	0	0	0	0	0	0	sp|P02662|CASA1_BOVIN	117	129
KKYKVPQLEIVPN	0	0	0	0	0	1	sp|P02662|CASA1_BOVIN	117	129
KKYKVPQLEIVPNSAE	0	1	0	0	0	0	sp|P02662|CASA1_BOVIN	117	132
KKYKVPQLEIVPNSAEER	0	1	0	0	0	0	sp|P02662|CASA1_BOVIN	117	134
KKYKVPQLEIVPNSAEERL	0	0	0	0	0	0	sp|P02662|CASA1_BOVIN	117	135
KKYKVPQLEIVPNSAEERL	0	1	0	0	0	0	sp|P02662|CASA1_BOVIN	117	135
KKYKVPQLEIVPNSAEERLH	0	0	0	0	0	0	sp|P02662|CASA1_BOVIN	117	136
KKYKVPQLEIVPNSAEERLH	0	1	0	0	0	0	sp|P02662|CASA1_BOVIN	117	136
KKYKVPQLEIVPNSAEERLHS	0	1	0	0	0	0	sp|P02662|CASA1_BOVIN	117	137
KKYKVPQLEIVPNSAEERLHSM	0	1	0	0	0	0	sp|P02662|CASA1_BOVIN	117	138
KKYKVPQLEIVPNSAEERLHSM	0	0	0	0	0	0	sp|P02662|CASA1_BOVIN	117	138
KKYKVPQLEIVPNSAEERLHSMK	0	1	0	0	0	0	sp|P02662|CASA1_BOVIN	117	139
KKYKVPQLEIVPNSAEERLHSMKE	0	1	0	0	0	0	sp|P02662|CASA1_BOVIN	117	140
KKYKVPQLEIVPNSAEERLHSMKEG	0	1	0	0	0	0	sp|P02662|CASA1_BOVIN	117	141
KKYKVPQLEIVPNSAEERLHSMKEGIH	0	1	0	0	0	0	sp|P02662|CASA1_BOVIN	117	143
KKYKVPQLEIVPNSAEERLHSMKEGIH	0	0	0	0	0	0	sp|P02662|CASA1_BOVIN	117	143
KKYKVPQLEIVPNSAEERLHSMKEGIHA	0	1	0	0	0	0	sp|P02662|CASA1_BOVIN	117	144
KKYKVPQLEIVPNSAEERLHSMKEGIHAQ	0	0	0	0	0	0	sp|P02662|CASA1_BOVIN	117	145
KKYKVPQLEIVPNSAEERLHSMKEGIHAQ	0	1	0	0	0	0	sp|P02662|CASA1_BOVIN	117	145
KKYKVPQLEIVPNSAEERLHSMKEGIHAQ	0	0	0	0	0	1	sp|P02662|CASA1_BOVIN	117	145
KKYKVPQLEIVPNSAEERLHSMKEGIHAQQ	0	0	0	0	0	1	sp|P02662|CASA1_BOVIN	117	146
KKYKVPQLEIVPNSAEERLHSMKEGIHAQQKEPMIGV	0	1	0	0	0	0	sp|P02662|CASA1_BOVIN	117	153
KKYKVPQLEIVPNSAEERLHSMKEGIHAQQKEPMIGVN	0	1	0	0	0	0	sp|P02662|CASA1_BOVIN	117	154
KLTEEEKNRL	0	0	0	0	0	0	sp|P02663|CASA2_BOVIN	167	176
KLTEEEKNRLN	0	0	0	0	0	0	sp|P02663|CASA2_BOVIN	167	177
KLTEEEKNRLN	0	0	0	0	0	1	sp|P02663|CASA2_BOVIN	167	177
KLTEEEKNRLNF	0	0	0	0	0	0	sp|P02663|CASA2_BOVIN	167	178
KLTEEEKNRLNFL	0	0	0	0	0	0	sp|P02663|CASA2_BOVIN	167	179
KLTEEEKNRLNFLKK	0	0	0	0	0	0	sp|P02663|CASA2_BOVIN	167	181
KNTMEHVSSSEESIISQETYK	0	3	0	0	0	0	sp|P02663|CASA2_BOVIN	16	36
KNTMEHVSSSEESIISQETYKQEK	0	3	0	0	0	0	sp|P02663|CASA2_BOVIN	16	39
KPWIQPK	0	0	0	0	0	0	sp|P02663|CASA2_BOVIN	206	212
KPWIQPK	0	0	0	0	0	1	sp|P02663|CASA2_BOVIN	206	212
KPWIQPKT	0	0	0	0	0	0	sp|P02663|CASA2_BOVIN	206	213
KPWIQPKTKV	0	0	0	0	0	0	sp|P02663|CASA2_BOVIN	206	215
KPWIQPKTKVIP	0	0	0	0	0	0	sp|P02663|CASA2_BOVIN	206	217
KPWIQPKTKVIPY	0	0	0	0	0	0	sp|P02663|CASA2_BOVIN	206	218
KPWIQPKTKVIPYVR	0	0	0	0	0	0	sp|P02663|CASA2_BOVIN	206	220
KSEPVSPKNGVLPQ	0	0	0	0	0	0	tr|E1BDZ3|E1BDZ3_BOVIN	2075	2088
KTKLTEEEKN	0	0	0	0	0	0	sp|P02663|CASA2_BOVIN	165	174
KTKLTEEEKNRL	0	0	0	0	0	0	sp|P02663|CASA2_BOVIN	165	176
KTKLTEEEKNRL	0	0	0	0	0	1	sp|P02663|CASA2_BOVIN	165	176
KTKLTEEEKNRLN	0	0	0	0	0	0	sp|P02663|CASA2_BOVIN	165	177
KTKLTEEEKNRLN	0	0	0	0	0	1	sp|P02663|CASA2_BOVIN	165	177
KTKLTEEEKNRLNF	0	0	0	0	0	0	sp|P02663|CASA2_BOVIN	165	178
KTKLTEEEKNRLNFL	0	0	0	0	0	0	sp|P02663|CASA2_BOVIN	165	179
KTKLTEEEKNRLNFLK	0	0	0	0	0	0	sp|P02663|CASA2_BOVIN	165	180
KTKLTEEEKNRLNFLK	0	0	0	0	0	1	sp|P02663|CASA2_BOVIN	165	180
KTKLTEEEKNRLNFLKK	0	0	0	0	0	0	sp|P02663|CASA2_BOVIN	165	181
KTKLTEEEKNRLNFLKK	0	0	0	0	0	1	sp|P02663|CASA2_BOVIN	165	181
KTKLTEEEKNRLNFLKKI	0	0	0	0	0	0	sp|P02663|CASA2_BOVIN	165	182
KTKLTEEEKNRLNFLKKIS	0	0	0	0	0	1	sp|P02663|CASA2_BOVIN	165	183
KTKLTEEEKNRLNFLKKIS	0	0	0	0	0	0	sp|P02663|CASA2_BOVIN	165	183
KTKLTEEEKNRLNFLKKISQ	0	0	0	0	0	0	sp|P02663|CASA2_BOVIN	165	184
KTKLTEEEKNRLNFLKKISQ	0	0	0	0	0	1	sp|P02663|CASA2_BOVIN	165	184
KTKLTEEEKNRLNFLKKISQR	0	0	0	0	0	0	sp|P02663|CASA2_BOVIN	165	185
KTKLTEEEKNRLNFLKKISQRY	0	0	0	0	0	0	sp|P02663|CASA2_BOVIN	165	186
KTKLTEEEKNRLNFLKKISQRY	0	0	0	0	0	1	sp|P02663|CASA2_BOVIN	165	186
KTKLTEEEKNRLNFLKKISQRYQ	0	0	0	0	0	0	sp|P02663|CASA2_BOVIN	165	187
KTKLTEEEKNRLNFLKKISQRYQ	0	0	0	0	0	1	sp|P02663|CASA2_BOVIN	165	187
KTKLTEEEKNRLNFLKKISQRYQKF	0	0	0	0	0	1	sp|P02663|CASA2_BOVIN	165	189
KTVDMESTE	0	0	0	0	0	0	sp|P02663|CASA2_BOVIN	152	160
KTVDMESTE	0	1	0	0	0	0	sp|P02663|CASA2_BOVIN	152	160
KTVDMESTEVF	0	0	0	0	0	0	sp|P02663|CASA2_BOVIN	152	162
KTVDMESTEVF	0	1	0	0	0	0	sp|P02663|CASA2_BOVIN	152	162
KTVDMESTEVFTK	0	1	0	0	0	0	sp|P02663|CASA2_BOVIN	152	164
KTVDMESTEVFTKK	0	1	0	0	0	0	sp|P02663|CASA2_BOVIN	152	165
KTVDMESTEVFTKK	0	0	0	0	0	0	sp|P02663|CASA2_BOVIN	152	165
KTVDMESTEVFTKKT	0	1	0	0	0	0	sp|P02663|CASA2_BOVIN	152	166
KTVDMESTEVFTKKTK	0	1	0	0	0	0	sp|P02663|CASA2_BOVIN	152	167
KTVDMESTEVFTKKTKL	0	1	0	0	0	0	sp|P02663|CASA2_BOVIN	152	168
KTVDMESTEVFTKKTKLT	0	1	0	0	0	0	sp|P02663|CASA2_BOVIN	152	169
KTVDMESTEVFTKKTKLTEEEKN	0	1	0	0	0	0	sp|P02663|CASA2_BOVIN	152	174
KTVDMESTEVFTKKTKLTEEEKNRL	0	1	0	0	0	0	sp|P02663|CASA2_BOVIN	152	176
KTVDMESTEVFTKKTKLTEEEKNRLN	0	1	0	0	0	0	sp|P02663|CASA2_BOVIN	152	177
KTVDMESTEVFTKKTKLTEEEKNRLNF	0	1	0	0	0	0	sp|P02663|CASA2_BOVIN	152	178
KTVDMESTEVFTKKTKLTEEEKNRLNFL	0	1	0	0	0	0	sp|P02663|CASA2_BOVIN	152	179
KVIPYVRYL	0	0	0	0	0	0	sp|P02663|CASA2_BOVIN	214	222
KVKEAMAPK	0	0	0	0	0	0	sp|P02666|CASB_BOVIN	112	120
KVKEAMAPKHK	0	0	0	0	0	0	sp|P02666|CASB_BOVIN	112	122
KVKEAMAPKHKEMPFPK	0	0	0	0	0	0	sp|P02666|CASB_BOVIN	112	128
KVKEAMAPKHKEMPFPKYPVEPF	0	0	0	0	0	0	sp|P02666|CASB_BOVIN	112	134
KVKEAMAPKHKEMPFPKYPVEPF	0	0	1	0	0	0	sp|P02666|CASB_BOVIN	112	134
KVKEAMAPKHKEMPFPKYPVEPFTESQ	0	0	0	0	0	0	sp|P02666|CASB_BOVIN	112	138
KVKEAMAPKHKEMPFPKYPVEPFTESQSLTL	0	0	0	0	0	1	sp|P02666|CASB_BOVIN	112	142
KVLPVPQ	0	0	0	0	0	0	sp|P02666|CASB_BOVIN	184	190
KVLPVPQK	0	0	0	0	0	0	sp|P02666|CASB_BOVIN	184	191
KVLPVPQKAVPYPQ	0	0	0	0	0	0	sp|P02666|CASB_BOVIN	184	197
KVLPVPQKAVPYPQRDMPIQA	0	0	0	0	0	0	sp|P02666|CASB_BOVIN	184	204
KVLPVPQKAVPYPQRDMPIQAF	0	0	0	0	0	0	sp|P02666|CASB_BOVIN	184	205
KVLPVPQKAVPYPQRDMPIQAF	0	0	0	0	0	1	sp|P02666|CASB_BOVIN	184	205
KVLPVPQKAVPYPQRDMPIQAFLLYQEPVL	0	0	0	0	0	1	sp|P02666|CASB_BOVIN	184	213
KVNELSKDIGSESTE	0	2	0	0	0	0	sp|P02662|CASA1_BOVIN	51	65
KVNELSKDIGSESTEDQAMEDIK	0	2	0	0	0	0	sp|P02662|CASA1_BOVIN	51	73
KVPLAG	0	0	0	0	0	0	sp|Q2TBK2|RM09_BOVIN	61	66
KVPQLEIVPNSAEER	0	1	0	0	0	0	sp|P02662|CASA1_BOVIN	120	134
KVPQLEIVPNSAEERL	0	1	0	0	0	0	sp|P02662|CASA1_BOVIN	120	135
KVPQLEIVPNSAEERLH	0	0	0	0	0	0	sp|P02662|CASA1_BOVIN	120	136
KVPQLEIVPNSAEERLH	0	1	0	0	0	0	sp|P02662|CASA1_BOVIN	120	136
KVPQLEIVPNSAEERLHS	0	1	0	0	0	0	sp|P02662|CASA1_BOVIN	120	137
KVPQLEIVPNSAEERLHSM	0	1	0	0	0	0	sp|P02662|CASA1_BOVIN	120	138
KVPQLEIVPNSAEERLHSMK	0	1	0	0	0	0	sp|P02662|CASA1_BOVIN	120	139
KVPQLEIVPNSAEERLHSMKEGIH	0	1	0	0	0	0	sp|P02662|CASA1_BOVIN	120	143
KVPQLEIVPNSAEERLHSMKEGIHAQ	0	1	0	0	0	0	sp|P02662|CASA1_BOVIN	120	145
KYKVPQL	0	0	0	0	0	0	sp|P02662|CASA1_BOVIN	118	124
KYKVPQLE	0	0	0	0	0	0	sp|P02662|CASA1_BOVIN	118	125
KYKVPQLEIVPN	0	0	0	0	0	0	sp|P02662|CASA1_BOVIN	118	129
KYKVPQLEIVPNSAE	0	1	0	0	0	0	sp|P02662|CASA1_BOVIN	118	132
KYKVPQLEIVPNSAEER	0	1	0	0	0	0	sp|P02662|CASA1_BOVIN	118	134
KYKVPQLEIVPNSAEERL	0	1	0	0	0	0	sp|P02662|CASA1_BOVIN	118	135
KYKVPQLEIVPNSAEERLH	0	1	0	0	0	0	sp|P02662|CASA1_BOVIN	118	136
KYKVPQLEIVPNSAEERLHSM	0	0	0	0	0	0	sp|P02662|CASA1_BOVIN	118	138
KYKVPQLEIVPNSAEERLHSM	0	1	0	0	0	0	sp|P02662|CASA1_BOVIN	118	138
KYKVPQLEIVPNSAEERLHSMK	0	1	0	0	0	0	sp|P02662|CASA1_BOVIN	118	139
KYKVPQLEIVPNSAEERLHSMKE	0	1	0	0	0	0	sp|P02662|CASA1_BOVIN	118	140
KYKVPQLEIVPNSAEERLHSMKEGIH	0	1	0	0	0	0	sp|P02662|CASA1_BOVIN	118	143
KYKVPQLEIVPNSAEERLHSMKEGIHA	0	1	0	0	0	0	sp|P02662|CASA1_BOVIN	118	144
KYKVPQLEIVPNSAEERLHSMKEGIHAQ	0	0	0	0	0	1	sp|P02662|CASA1_BOVIN	118	145
KYKVPQLEIVPNSAEERLHSMKEGIHAQ	0	1	0	0	0	0	sp|P02662|CASA1_BOVIN	118	145
KYPVEPF	0	0	0	0	0	0	sp|P02666|CASB_BOVIN	128	134
KYPVEPFTESQ	0	0	0	0	0	0	sp|P02666|CASB_BOVIN	128	138
KYPVEPFTESQSL	0	0	0	0	0	0	sp|P02666|CASB_BOVIN	128	140
KYPVEPFTESQSLTLTDVENLHLPLPLLQS	0	0	0	0	0	1	sp|P02666|CASB_BOVIN	128	157
LCLRKLIPMRGEVVPVPGAS	0	0	0	0	0	0	tr|Q58DQ8|Q58DQ8_BOVIN	217	236
LDAYPSGAWYYVPLGTQYTDAPSFSDIPNPIGSENSEKTTMPLW	0	0	0	0	0	1	sp|P02662|CASA1_BOVIN	171	214
LDAYPSGAWYYVPLGTQYTDAPSFSDIPNPIGSENSEKTTMPLW	0	0	0	0	0	2	sp|P02662|CASA1_BOVIN	171	214
LDAYPSGAWYYVPLGTQYTDAPSFSDIPNPIGSENSEKTTMPLW	0	0	0	0	0	0	sp|P02662|CASA1_BOVIN	171	214
LEIVPNSAEER	0	1	0	0	0	0	sp|P02662|CASA1_BOVIN	124	134
LEIVPNSAEERL	0	1	0	0	0	0	sp|P02662|CASA1_BOVIN	124	135
LEIVPNSAEERLH	0	0	0	0	0	0	sp|P02662|CASA1_BOVIN	124	136
LEIVPNSAEERLH	0	1	0	0	0	0	sp|P02662|CASA1_BOVIN	124	136
LEIVPNSAEERLHSM	0	1	0	0	0	0	sp|P02662|CASA1_BOVIN	124	138
LEIVPNSAEERLHSMK	0	1	0	0	0	0	sp|P02662|CASA1_BOVIN	124	139
LEIVPNSAEERLHSMKEGIH	0	1	0	0	0	0	sp|P02662|CASA1_BOVIN	124	143
LEIVPNSAEERLHSMKEGIHAQ	0	1	0	0	0	0	sp|P02662|CASA1_BOVIN	124	145
LEQLLRLK	0	0	0	0	0	0	sp|P02662|CASA1_BOVIN	110	117
LEQLLRLKK	0	0	0	0	0	0	sp|P02662|CASA1_BOVIN	110	118
LEQLLRLKKY	0	0	0	0	0	0	sp|P02662|CASA1_BOVIN	110	119
LFRQFYQLDAYPS	0	0	0	0	0	0	sp|P02662|CASA1_BOVIN	164	176
LGYLEQLLR	0	0	0	0	0	0	sp|P02662|CASA1_BOVIN	107	115
LGYLEQLLRL	0	0	0	0	0	0	sp|P02662|CASA1_BOVIN	107	116
LGYLEQLLRLK	0	0	0	0	0	0	sp|P02662|CASA1_BOVIN	107	117
LGYLEQLLRLKK	0	0	0	0	0	0	sp|P02662|CASA1_BOVIN	107	118
LGYLEQLLRLKKYKVPQLEIVPNSAEERLH	0	1	0	0	0	0	sp|P02662|CASA1_BOVIN	107	136
LHLPLPLLQ	0	0	0	0	0	0	sp|P02666|CASB_BOVIN	148	156
LHSMKEGIH	0	0	0	0	0	0	sp|P02662|CASA1_BOVIN	135	143
LHSMKEGIHAQ	0	0	0	0	0	0	sp|P02662|CASA1_BOVIN	135	145
LHSMKEGIHAQQKEPMIGVN	0	0	0	0	0	0	sp|P02662|CASA1_BOVIN	135	154
LHSMKEGIHAQQKEPMIGVNQELA	0	0	0	0	0	0	sp|P02662|CASA1_BOVIN	135	158
LHSMKEGIHAQQKEPMIGVNQELA	0	0	0	0	0	1	sp|P02662|CASA1_BOVIN	135	158
LHSMKEGIHAQQKEPMIGVNQELAY	0	0	0	0	0	1	sp|P02662|CASA1_BOVIN	135	159
LIESQENSKL	0	1	0	0	0	0	sp|P31098|OSTK_BOVIN	229	238
LINNQFLPYPYYAKPA	0	0	0	0	0	0	sp|P02668|CASK_BOVIN	71	86
LISKEQIVIR	0	1	0	0	0	0	sp|P80195|GLCM1_BOVIN	62	71
LKKYKVPQLEIVPNSAEER	0	1	0	0	0	0	sp|P02662|CASA1_BOVIN	116	134
LKKYKVPQLEIVPNSAEERL	0	1	0	0	0	0	sp|P02662|CASA1_BOVIN	116	135
LKKYKVPQLEIVPNSAEERLH	0	1	0	0	0	0	sp|P02662|CASA1_BOVIN	116	136
LKKYKVPQLEIVPNSAEERLHSM	0	1	0	0	0	0	sp|P02662|CASA1_BOVIN	116	138
LKKYKVPQLEIVPNSAEERLHSMK	0	1	0	0	0	0	sp|P02662|CASA1_BOVIN	116	139
LKKYKVPQLEIVPNSAEERLHSMKEGIH	0	1	0	0	0	0	sp|P02662|CASA1_BOVIN	116	143
LKKYKVPQLEIVPNSAEERLHSMKEGIHAQ	0	1	0	0	0	0	sp|P02662|CASA1_BOVIN	116	145
LLPGELAKHAVSEGTK	0	0	0	0	0	0	sp|Q2M2T1|H2B1K_BOVIN	102	117
LLQSWMHQPHQPLPPTVMFPPQ	0	0	0	0	0	0	sp|P02666|CASB_BOVIN	154	175
LLRLKKYKVPQLEIVPNSAEERL	0	1	0	0	0	0	sp|P02662|CASA1_BOVIN	113	135
LLRLKKYKVPQLEIVPNSAEERLH	0	1	0	0	0	0	sp|P02662|CASA1_BOVIN	113	136
LLRLKKYKVPQLEIVPNSAEERLHSM	0	1	0	0	0	0	sp|P02662|CASA1_BOVIN	113	138
LLYQEPVLGPV	0	0	0	0	0	0	sp|P02666|CASB_BOVIN	206	216
LLYQEPVLGPVR	0	0	0	0	0	0	sp|P02666|CASB_BOVIN	206	217
LLYQEPVLGPVRGP	0	0	0	0	0	0	sp|P02666|CASB_BOVIN	206	219
LLYQEPVLGPVRGPFP	0	0	0	0	0	0	sp|P02666|CASB_BOVIN	206	221
LLYQEPVLGPVRGPFPII	0	0	0	0	0	0	sp|P02666|CASB_BOVIN	206	223
LLYQEPVLGPVRGPFPIIV	0	0	0	0	0	0	sp|P02666|CASB_BOVIN	206	224
LLYQEPVLGPVRGPFPIIV	0	0	0	0	0	1	sp|P02666|CASB_BOVIN	206	224
LMNSRSLELFSIDPQ	0	0	1	0	0	0	tr|F1MHH5|F1MHH5_BOVIN	366	380
LNEINQFYQKFPQ	0	0	0	0	0	0	sp|P02663|CASA2_BOVIN	97	109
LNEINQFYQKFPQY	0	0	0	0	0	0	sp|P02663|CASA2_BOVIN	97	110
LNEINQFYQKFPQYLQYLYQGPIVLNPWDQVKR	0	0	0	0	0	2	sp|P02663|CASA2_BOVIN	97	129
LNENLLRF	0	0	0	0	0	0	sp|P02662|CASA1_BOVIN	31	38
LNFLKKIS	0	0	0	0	0	0	sp|P02663|CASA2_BOVIN	176	183
LNKPEDETHL	0	0	0	0	0	0	sp|P80195|GLCM1_BOVIN	20	29
LNKPEDETHLE	0	0	0	0	0	0	sp|P80195|GLCM1_BOVIN	20	30
LNPWDQVKR	0	0	0	0	0	0	sp|P02663|CASA2_BOVIN	121	129
LNPWDQVKRN	0	0	0	0	0	0	sp|P02663|CASA2_BOVIN	121	130
LNREQLSTSEENS	0	1	0	0	0	0	sp|P02663|CASA2_BOVIN	138	150
LNREQLSTSEENSK	0	2	0	0	0	0	sp|P02663|CASA2_BOVIN	138	151
LNREQLSTSEENSK	0	1	0	0	0	0	sp|P02663|CASA2_BOVIN	138	151
LNREQLSTSEENSKK	0	2	0	0	0	0	sp|P02663|CASA2_BOVIN	138	152
LNREQLSTSEENSKK	0	0	0	0	0	0	sp|P02663|CASA2_BOVIN	138	152
LNREQLSTSEENSKK	0	1	0	0	0	0	sp|P02663|CASA2_BOVIN	138	152
LNREQLSTSEENSKK	0	3	0	0	0	0	sp|P02663|CASA2_BOVIN	138	152
LNREQLSTSEENSKKT	0	2	0	0	0	0	sp|P02663|CASA2_BOVIN	138	153
LNREQLSTSEENSKKT	0	1	0	0	0	0	sp|P02663|CASA2_BOVIN	138	153
LNREQLSTSEENSKKTV	0	2	0	0	0	0	sp|P02663|CASA2_BOVIN	138	154
LNREQLSTSEENSKKTV	0	3	0	0	0	0	sp|P02663|CASA2_BOVIN	138	154
LNREQLSTSEENSKKTVD	0	1	0	0	0	0	sp|P02663|CASA2_BOVIN	138	155
LNREQLSTSEENSKKTVD	0	2	0	0	0	0	sp|P02663|CASA2_BOVIN	138	155
LNREQLSTSEENSKKTVD	0	3	0	0	0	0	sp|P02663|CASA2_BOVIN	138	155
LNREQLSTSEENSKKTVDME	0	1	0	0	0	0	sp|P02663|CASA2_BOVIN	138	157
LNREQLSTSEENSKKTVDME	0	2	0	0	0	0	sp|P02663|CASA2_BOVIN	138	157
LNREQLSTSEENSKKTVDMESTEVFTK	0	1	0	0	0	0	sp|P02663|CASA2_BOVIN	138	164
LNREQLSTSEENSKKTVDMESTEVFTK	0	3	0	0	0	0	sp|P02663|CASA2_BOVIN	138	164
LNREQLSTSEENSKKTVDMESTEVFTK	0	2	0	0	0	0	sp|P02663|CASA2_BOVIN	138	164
LNREQLSTSEENSKKTVDMESTEVFTKK	0	3	0	0	0	0	sp|P02663|CASA2_BOVIN	138	165
LNREQLSTSEENSKKTVDMESTEVFTKK	0	1	0	0	0	0	sp|P02663|CASA2_BOVIN	138	165
LNREQLSTSEENSKKTVDMESTEVFTKK	0	2	0	0	0	0	sp|P02663|CASA2_BOVIN	138	165
LNREQLSTSEENSKKTVDMESTEVFTKKT	0	3	0	0	0	0	sp|P02663|CASA2_BOVIN	138	166
LNREQLSTSEENSKKTVDMESTEVFTKKTK	0	1	0	0	0	0	sp|P02663|CASA2_BOVIN	138	167
LNREQLSTSEENSKKTVDMESTEVFTKKTK	0	3	0	0	0	0	sp|P02663|CASA2_BOVIN	138	167
LNREQLSTSEENSKKTVDMESTEVFTKKTKL	0	3	0	0	0	0	sp|P02663|CASA2_BOVIN	138	168
LNREQLSTSEENSKKTVDMESTEVFTKKTKLT	0	3	0	0	0	0	sp|P02663|CASA2_BOVIN	138	169
LNREQLSTSEENSKKTVDMESTEVFTKKTKLTEEEKN	0	3	0	0	0	0	sp|P02663|CASA2_BOVIN	138	174
LNREQLSTSEENSKKTVDMESTEVFTKKTKLTEEEKNRLN	0	3	0	0	0	0	sp|P02663|CASA2_BOVIN	138	177
LPCLPSEEWPNPPT	0	0	0	0	0	0	sp|Q2HJD0|FAF2_BOVIN	412	425
LPLPLLQSWMHQPHQPLPPT	0	0	0	0	0	0	sp|P02666|CASB_BOVIN	150	169
LPQYLKT	0	0	0	0	0	0	sp|P02663|CASA2_BOVIN	191	197
LPQYLKTV	0	0	0	0	0	0	sp|P02663|CASA2_BOVIN	191	198
LPQYLKTVY	0	0	0	0	0	0	sp|P02663|CASA2_BOVIN	191	199
LPQYLKTVYQ	0	0	0	0	0	0	sp|P02663|CASA2_BOVIN	191	200
LPQYLKTVYQH	0	0	0	0	0	0	sp|P02663|CASA2_BOVIN	191	201
LPQYLKTVYQHQ	0	0	0	0	0	0	sp|P02663|CASA2_BOVIN	191	202
LPQYLKTVYQHQK	0	0	0	0	0	0	sp|P02663|CASA2_BOVIN	191	203
LPQYLKTVYQHQKA	0	0	0	0	0	0	sp|P02663|CASA2_BOVIN	191	204
LPVPQKAVPY	0	0	0	0	0	0	sp|P02666|CASB_BOVIN	186	195
LPVPQKAVPYPQ	0	0	0	0	0	0	sp|P02666|CASB_BOVIN	186	197
LPVPQKAVPYPQ	0	0	0	0	0	1	sp|P02666|CASB_BOVIN	186	197
LPVPQKAVPYPQRDMP	0	0	0	0	0	0	sp|P02666|CASB_BOVIN	186	201
LPVPQKAVPYPQRDMPIQA	0	0	0	0	0	0	sp|P02666|CASB_BOVIN	186	204
LPVPQKAVPYPQRDMPIQAF	0	0	0	0	0	0	sp|P02666|CASB_BOVIN	186	205
LPYPYYAKPA	0	0	0	0	0	0	sp|P02668|CASK_BOVIN	77	86
LQPEVMGVS	0	0	0	0	0	0	sp|P02666|CASB_BOVIN	103	111
LQPEVMGVSK	0	0	0	0	0	0	sp|P02666|CASB_BOVIN	103	112
LQPEVMGVSKVK	0	0	0	0	0	0	sp|P02666|CASB_BOVIN	103	114
LQPEVMGVSKVKE	0	0	0	0	0	0	sp|P02666|CASB_BOVIN	103	115
LQPEVMGVSKVKEA	0	0	0	0	0	0	sp|P02666|CASB_BOVIN	103	116
LQPEVMGVSKVKEAMAPK	0	0	0	0	0	0	sp|P02666|CASB_BOVIN	103	120
LQPEVMGVSKVKEAMAPKHK	0	0	1	0	0	0	sp|P02666|CASB_BOVIN	103	122
LQPEVMGVSKVKEAMAPKHK	0	0	0	0	0	0	sp|P02666|CASB_BOVIN	103	122
LQSWMHQPHQPLPPT	0	0	0	0	0	0	sp|P02666|CASB_BOVIN	155	169
LQSWMHQPHQPLPPT	0	0	1	0	0	0	sp|P02666|CASB_BOVIN	155	169
LQSWMHQPHQPLPPT	0	0	0	0	0	1	sp|P02666|CASB_BOVIN	155	169
LQSWMHQPHQPLPPTVMFPPQ	0	0	0	0	0	0	sp|P02666|CASB_BOVIN	155	175
LQSWMHQPHQPLPPTVMFPPQ	0	0	1	0	0	0	sp|P02666|CASB_BOVIN	155	175
LQSWMHQPHQPLPPTVMFPPQS	0	0	0	0	0	0	sp|P02666|CASB_BOVIN	155	176
LQSWMHQPHQPLPPTVMFPPQS	0	0	0	0	0	1	sp|P02666|CASB_BOVIN	155	176
LQSWMHQPHQPLPPTVMFPPQSV	0	0	0	0	0	1	sp|P02666|CASB_BOVIN	155	177
LQSWMHQPHQPLPPTVMFPPQSV	0	0	0	0	0	0	sp|P02666|CASB_BOVIN	155	177
LQSWMHQPHQPLPPTVMFPPQSVL	0	0	0	0	0	0	sp|P02666|CASB_BOVIN	155	178
LQSWMHQPHQPLPPTVMFPPQSVL	0	0	0	0	0	1	sp|P02666|CASB_BOVIN	155	178
LQSWMHQPHQPLPPTVMFPPQSVLSL	0	0	0	0	0	1	sp|P02666|CASB_BOVIN	155	180
LQSWMHQPHQPLPPTVMFPPQSVLSL	0	0	0	0	0	0	sp|P02666|CASB_BOVIN	155	180
LQYLYQGPIVLNPWDQVK	0	0	0	0	0	0	sp|P02663|CASA2_BOVIN	111	128
LQYLYQGPIVLNPWDQVKR	0	0	0	0	0	0	sp|P02663|CASA2_BOVIN	111	129
LQYLYQGPIVLNPWDQVKRN	0	0	0	0	0	0	sp|P02663|CASA2_BOVIN	111	130
LQYLYQGPIVLNPWDQVKRNAVPITPT	0	0	0	0	0	1	sp|P02663|CASA2_BOVIN	111	137
LQYLYQGPIVLNPWDQVKRNAVPITPT	0	0	0	0	0	0	sp|P02663|CASA2_BOVIN	111	137
LQYLYQGPIVLNPWDQVKRNAVPITPTL	0	0	0	0	0	1	sp|P02663|CASA2_BOVIN	111	138
LRLKKYKVPQLEIVPN	0	0	0	0	0	0	sp|P02662|CASA1_BOVIN	114	129
LRLKKYKVPQLEIVPNSAE	0	1	0	0	0	0	sp|P02662|CASA1_BOVIN	114	132
LRLKKYKVPQLEIVPNSAEER	0	1	0	0	0	0	sp|P02662|CASA1_BOVIN	114	134
LRLKKYKVPQLEIVPNSAEERL	0	1	0	0	0	0	sp|P02662|CASA1_BOVIN	114	135
LRLKKYKVPQLEIVPNSAEERLH	0	1	0	0	0	0	sp|P02662|CASA1_BOVIN	114	136
LRLKKYKVPQLEIVPNSAEERLHS	0	1	0	0	0	0	sp|P02662|CASA1_BOVIN	114	137
LRLKKYKVPQLEIVPNSAEERLHSM	0	1	0	0	0	0	sp|P02662|CASA1_BOVIN	114	138
LRLKKYKVPQLEIVPNSAEERLHSMKEGIHA	0	0	1	0	0	0	sp|P02662|CASA1_BOVIN	114	144
LRLKKYKVPQLEIVPNSAEERLHSMKEGIHAQ	0	1	0	0	0	0	sp|P02662|CASA1_BOVIN	114	145
LSKDIGSESTE	0	2	0	0	0	0	sp|P02662|CASA1_BOVIN	55	65
LSKDIGSESTE	0	1	0	0	0	0	sp|P02662|CASA1_BOVIN	55	65
LSKDIGSESTE	0	0	0	0	0	0	sp|P02662|CASA1_BOVIN	55	65
LSKDIGSESTEDQAM	0	1	0	0	0	0	sp|P02662|CASA1_BOVIN	55	69
LSKDIGSESTEDQAMEDIK	0	2	0	0	0	0	sp|P02662|CASA1_BOVIN	55	73
LSKDIGSESTEDQAMEDIKQ	0	2	0	0	0	0	sp|P02662|CASA1_BOVIN	55	74
LSKDIGSESTEDQAMEDIKQM	0	2	0	0	0	0	sp|P02662|CASA1_BOVIN	55	75
LSLSQSKVLPVPQ	0	0	0	0	0	0	sp|P02666|CASB_BOVIN	178	190
LSLSQSKVLPVPQK	0	0	0	0	0	0	sp|P02666|CASB_BOVIN	178	191
LSLSQSKVLPVPQKAVPYPQ	0	0	0	0	0	0	sp|P02666|CASB_BOVIN	178	197
LSLSQSKVLPVPQKAVPYPQRDMPIQ	0	0	0	0	0	0	sp|P02666|CASB_BOVIN	178	203
LSLSQSKVLPVPQKAVPYPQRDMPIQ	0	0	0	0	0	1	sp|P02666|CASB_BOVIN	178	203
LSLSQSKVLPVPQKAVPYPQRDMPIQA	0	0	0	0	0	1	sp|P02666|CASB_BOVIN	178	204
LSLSQSKVLPVPQKAVPYPQRDMPIQA	0	2	0	0	0	0	sp|P02666|CASB_BOVIN	178	204
LSLSQSKVLPVPQKAVPYPQRDMPIQA	0	0	0	0	0	0	sp|P02666|CASB_BOVIN	178	204
LSLSQSKVLPVPQKAVPYPQRDMPIQAF	0	0	0	0	0	0	sp|P02666|CASB_BOVIN	178	205
LSLSQSKVLPVPQKAVPYPQRDMPIQAF	0	0	0	0	0	1	sp|P02666|CASB_BOVIN	178	205
LSLSQSKVLPVPQKAVPYPQRDMPIQAFL	0	0	0	0	0	1	sp|P02666|CASB_BOVIN	178	206
LSLSQSKVLPVPQKAVPYPQRDMPIQAFLL	0	0	0	0	0	1	sp|P02666|CASB_BOVIN	178	207
LSLSQSKVLPVPQKAVPYPQRDMPIQAFLL	0	0	0	0	0	0	sp|P02666|CASB_BOVIN	178	207
LSLSQSKVLPVPQKAVPYPQRDMPIQAFLLYQEPVL	0	0	0	0	0	1	sp|P02666|CASB_BOVIN	178	213
LSLSQSKVLPVPQKAVPYPQRDMPIQAFLLYQEPVLGPV	0	0	0	0	0	1	sp|P02666|CASB_BOVIN	178	216
LSQSKVLPVPQ	0	0	0	0	0	0	sp|P02666|CASB_BOVIN	180	190
LSQSKVLPVPQK	0	0	0	0	0	0	sp|P02666|CASB_BOVIN	180	191
LSQSKVLPVPQKAVPYPQ	0	0	0	0	0	0	sp|P02666|CASB_BOVIN	180	197
LSQSKVLPVPQKAVPYPQRDMPIQA	0	0	0	0	0	1	sp|P02666|CASB_BOVIN	180	204
LSQSKVLPVPQKAVPYPQRDMPIQA	0	0	0	0	0	0	sp|P02666|CASB_BOVIN	180	204
LSQSKVLPVPQKAVPYPQRDMPIQAF	0	0	0	0	0	0	sp|P02666|CASB_BOVIN	180	205
LSQSKVLPVPQKAVPYPQRDMPIQAFLLYQEPVL	0	0	0	0	0	1	sp|P02666|CASB_BOVIN	180	213
LSTSEENSKKTVD	0	1	0	0	0	0	sp|P02663|CASA2_BOVIN	143	155
LTDVENLHLPLPL	0	0	0	0	0	0	sp|P02666|CASB_BOVIN	142	154
LTDVENLHLPLPLL	0	0	0	0	0	0	sp|P02666|CASB_BOVIN	142	155
LTDVENLHLPLPLLQ	0	0	0	0	0	0	sp|P02666|CASB_BOVIN	142	156
LTDVENLHLPLPLLQS	0	0	0	0	0	0	sp|P02666|CASB_BOVIN	142	157
LTDVENLHLPLPLLQSW	0	0	0	0	0	0	sp|P02666|CASB_BOVIN	142	158
LTDVENLHLPLPLLQSWM	0	0	0	0	0	0	sp|P02666|CASB_BOVIN	142	159
LTDVENLHLPLPLLQSWMHQPHQPLPPT	0	0	0	0	0	1	sp|P02666|CASB_BOVIN	142	169
LTDVENLHLPLPLLQSWMHQPHQPLPPT	0	0	0	0	0	0	sp|P02666|CASB_BOVIN	142	169
LTDVENLHLPLPLLQSWMHQPHQPLPPTVMFPPQ	0	0	0	0	0	1	sp|P02666|CASB_BOVIN	142	175
LTDVENLHLPLPLLQSWMHQPHQPLPPTVMFPPQSVL	0	0	0	0	0	2	sp|P02666|CASB_BOVIN	142	178
LTEEEKNRL	0	0	0	0	0	0	sp|P02663|CASA2_BOVIN	168	176
LTEEEKNRLN	0	0	0	0	0	0	sp|P02663|CASA2_BOVIN	168	177
LTEEEKNRLN	0	0	0	0	0	1	sp|P02663|CASA2_BOVIN	168	177
LTEEEKNRLNF	0	0	0	0	0	0	sp|P02663|CASA2_BOVIN	168	178
LTEEEKNRLNFL	0	0	0	0	0	0	sp|P02663|CASA2_BOVIN	168	179
LTEEEKNRLNFLK	0	0	0	0	0	0	sp|P02663|CASA2_BOVIN	168	180
LTEEEKNRLNFLKK	0	0	0	0	0	0	sp|P02663|CASA2_BOVIN	168	181
LTEEEKNRLNFLKKI	0	0	0	0	0	0	sp|P02663|CASA2_BOVIN	168	182
LTEEEKNRLNFLKKISQ	0	0	0	0	0	0	sp|P02663|CASA2_BOVIN	168	184
LTEEEKNRLNFLKKISQR	0	0	0	0	0	0	sp|P02663|CASA2_BOVIN	168	185
LTEEEKNRLNFLKKISQRY	0	0	0	0	0	0	sp|P02663|CASA2_BOVIN	168	186
LTEEEKNRLNFLKKISQRYQ	0	0	0	0	0	0	sp|P02663|CASA2_BOVIN	168	187
LTEEEKNRLNFLKKISQRYQK	0	0	0	0	0	1	sp|P02663|CASA2_BOVIN	168	188
LTEEEKNRLNFLKKISQRYQKF	0	0	0	0	0	1	sp|P02663|CASA2_BOVIN	168	189
LTLTDVENLHLPLPLLQSWMHQPHQPLPPTVMFPPQ	0	0	0	0	0	1	sp|P02666|CASB_BOVIN	140	175
LTLTDVENLHLPLPLLQSWMHQPHQPLPPTVMFPPQSVL	0	0	0	0	0	2	sp|P02666|CASB_BOVIN	140	178
LTLTDVENLHLPLPLLQSWMHQPHQPLPPTVMFPPQSVL	0	0	0	0	0	1	sp|P02666|CASB_BOVIN	140	178
LTLTDVENLHLPLPLLQSWMHQPHQPLPPTVMFPPQSVLSL	0	0	0	0	0	2	sp|P02666|CASB_BOVIN	140	180
LVYPFPGPIPN	0	0	0	0	0	0	sp|P02666|CASB_BOVIN	73	83
LVYPFPGPIPNS	0	0	0	0	0	0	sp|P02666|CASB_BOVIN	73	84
LVYPFPGPIPNSLPQ	0	0	0	0	0	0	sp|P02666|CASB_BOVIN	73	87
LVYPFPGPIPNSLPQNIPPL	0	0	0	0	0	0	sp|P02666|CASB_BOVIN	73	92
LVYPFPGPIPNSLPQNIPPLTQTPVVVPPFLQPEVMG	0	0	0	0	0	1	sp|P02666|CASB_BOVIN	73	109
LVYPFPGPIPNSLPQNIPPLTQTPVVVPPFLQPEVMG	0	0	0	0	0	0	sp|P02666|CASB_BOVIN	73	109
LYNRTPEQVAEEEYLLQELRKI	0	0	0	0	0	0	tr|Q1LZ99|Q1LZ99_BOVIN	233	254
LYNRTPEQVAEEEYLLQELRKI	0	0	0	0	0	1	tr|Q1LZ99|Q1LZ99_BOVIN	233	254
LYQEPVLGPV	0	0	0	0	0	0	sp|P02666|CASB_BOVIN	207	216
LYQEPVLGPVRGP	0	0	0	0	0	0	sp|P02666|CASB_BOVIN	207	219
LYQEPVLGPVRGPFP	0	0	0	0	0	0	sp|P02666|CASB_BOVIN	207	221
LYQEPVLGPVRGPFPII	0	0	0	0	0	0	sp|P02666|CASB_BOVIN	207	223
LYQEPVLGPVRGPFPIIV	0	0	0	0	0	1	sp|P02666|CASB_BOVIN	207	224
LYQEPVLGPVRGPFPIIV	0	0	0	0	0	0	sp|P02666|CASB_BOVIN	207	224
LYQGPIVLNPWDQVK	0	0	0	0	0	0	sp|P02663|CASA2_BOVIN	114	128
LYQGPIVLNPWDQVKR	0	0	0	0	0	0	sp|P02663|CASA2_BOVIN	114	129
LYQGPIVLNPWDQVKR	0	0	0	0	0	1	sp|P02663|CASA2_BOVIN	114	129
LYQGPIVLNPWDQVKRN	0	0	0	0	0	0	sp|P02663|CASA2_BOVIN	114	130
LYQGPIVLNPWDQVKRN	0	0	0	0	0	1	sp|P02663|CASA2_BOVIN	114	130
LYQGPIVLNPWDQVKRNAVP	0	0	0	0	0	0	sp|P02663|CASA2_BOVIN	114	133
MAINPSKENLCSTFCKEVVR	0	0	0	0	0	0	sp|P02663|CASA2_BOVIN	41	60
MAINPSKENLCSTFCKEVVR	0	0	0	0	0	1	sp|P02663|CASA2_BOVIN	41	60
MAPKHKEMPFPKYPVEPF	0	0	1	0	0	0	sp|P02666|CASB_BOVIN	117	134
MAPKHKEMPFPKYPVEPF	0	0	0	0	0	0	sp|P02666|CASB_BOVIN	117	134
MAPKHKEMPFPKYPVEPFTESQ	0	0	0	0	0	0	sp|P02666|CASB_BOVIN	117	138
MARHPHPHLSF	0	0	0	0	0	0	sp|P02668|CASK_BOVIN	116	126
MEDIKQM	0	0	0	0	0	0	sp|P02662|CASA1_BOVIN	69	75
MESTEVFTK	0	1	0	0	0	0	sp|P02663|CASA2_BOVIN	156	164
MESTEVFTKK	0	1	0	0	0	0	sp|P02663|CASA2_BOVIN	156	165
MESTEVFTKKTK	0	1	0	0	0	0	sp|P02663|CASA2_BOVIN	156	167
MESTEVFTKKTKLTEEEKNRLN	0	1	0	0	0	0	sp|P02663|CASA2_BOVIN	156	177
MGVSKVKE	0	0	0	0	0	0	sp|P02666|CASB_BOVIN	108	115
MGVSKVKEA	0	0	0	0	0	0	sp|P02666|CASB_BOVIN	108	116
MGVSKVKEAM	0	0	0	0	0	0	sp|P02666|CASB_BOVIN	108	117
MGVSKVKEAMAPK	0	0	0	0	0	0	sp|P02666|CASB_BOVIN	108	120
MGVSKVKEAMAPKHK	0	0	0	0	0	0	sp|P02666|CASB_BOVIN	108	122
MHQPHQPLPPT	0	0	1	0	0	0	sp|P02666|CASB_BOVIN	159	169
MHQPHQPLPPT	0	0	0	0	0	0	sp|P02666|CASB_BOVIN	159	169
MHQPHQPLPPTV	0	0	0	0	0	0	sp|P02666|CASB_BOVIN	159	170
MHQPHQPLPPTVM	0	0	0	0	0	0	sp|P02666|CASB_BOVIN	159	171
MHQPHQPLPPTVMFPPQ	0	0	1	0	0	0	sp|P02666|CASB_BOVIN	159	175
MHQPHQPLPPTVMFPPQ	0	0	0	0	0	0	sp|P02666|CASB_BOVIN	159	175
MHQPHQPLPPTVMFPPQ	0	0	0	0	0	1	sp|P02666|CASB_BOVIN	159	175
MHQPHQPLPPTVMFPPQS	0	0	0	0	0	0	sp|P02666|CASB_BOVIN	159	176
MHQPHQPLPPTVMFPPQSV	0	0	0	0	0	0	sp|P02666|CASB_BOVIN	159	177
MHQPHQPLPPTVMFPPQSVL	0	0	1	0	0	0	sp|P02666|CASB_BOVIN	159	178
MHQPHQPLPPTVMFPPQSVL	0	0	0	0	0	0	sp|P02666|CASB_BOVIN	159	178
MHQPHQPLPPTVMFPPQSVL	0	0	0	0	0	1	sp|P02666|CASB_BOVIN	159	178
MHQPHQPLPPTVMFPPQSVLS	0	0	0	0	0	0	sp|P02666|CASB_BOVIN	159	179
MHQPHQPLPPTVMFPPQSVLSL	0	0	1	0	0	0	sp|P02666|CASB_BOVIN	159	180
MHQPHQPLPPTVMFPPQSVLSL	0	0	0	0	0	0	sp|P02666|CASB_BOVIN	159	180
MHQPHQPLPPTVMFPPQSVLSL	0	0	0	0	0	1	sp|P02666|CASB_BOVIN	159	180
MHQPHQPLPPTVMFPPQSVLSLS	0	0	0	0	0	1	sp|P02666|CASB_BOVIN	159	181
MHQPHQPLPPTVMFPPQSVLSLS	0	0	0	0	0	0	sp|P02666|CASB_BOVIN	159	181
MHQPHQPLPPTVMFPPQSVLSLSQ	0	0	0	0	0	0	sp|P02666|CASB_BOVIN	159	182
MHQPHQPLPPTVMFPPQSVLSLSQ	0	0	0	0	0	1	sp|P02666|CASB_BOVIN	159	182
MHQPHQPLPPTVMFPPQSVLSLSQSK	0	0	0	0	0	0	sp|P02666|CASB_BOVIN	159	184
MHQPHQPLPPTVMFPPQSVLSLSQSKVLPVPQ	0	0	0	0	0	0	sp|P02666|CASB_BOVIN	159	190
MHQPHQPLPPTVMFPPQSVLSLSQSKVLPVPQ	0	0	0	0	0	1	sp|P02666|CASB_BOVIN	159	190
MHQPHQPLPPTVMFPPQSVLSLSQSKVLPVPQK	0	0	0	0	0	1	sp|P02666|CASB_BOVIN	159	191
MHQPHQPLPPTVMFPPQSVLSLSQSKVLPVPQKAVPYPQ	0	0	0	0	0	1	sp|P02666|CASB_BOVIN	159	197
MKGKNKLVPRLLGITKDSVMRVDEKTKE	0	0	2	0	0	0	tr|F1MQI1|F1MQI1_BOVIN	322	349
MKPWIQPK	0	0	1	0	0	0	sp|P02663|CASA2_BOVIN	205	212
MKPWIQPK	0	0	0	0	0	0	sp|P02663|CASA2_BOVIN	205	212
MKPWIQPKTK	0	0	0	0	0	0	sp|P02663|CASA2_BOVIN	205	214
MLPGAR	0	0	1	0	0	0	tr|F1MKX7|F1MKX7_BOVIN	770	775
MPFPKYPVEPF	0	0	1	0	0	0	sp|P02666|CASB_BOVIN	124	134
MPFPKYPVEPF	0	0	0	0	0	0	sp|P02666|CASB_BOVIN	124	134
MPFPKYPVEPFT	0	0	0	0	0	0	sp|P02666|CASB_BOVIN	124	135
MPFPKYPVEPFTE	0	0	0	0	0	0	sp|P02666|CASB_BOVIN	124	136
MPFPKYPVEPFTESQ	0	0	0	0	0	0	sp|P02666|CASB_BOVIN	124	138
MPFPKYPVEPFTESQSL	0	0	0	0	0	0	sp|P02666|CASB_BOVIN	124	140
MPIQAFLLYQEPVLGPVRGPFPIIV	0	0	0	0	0	0	sp|P02666|CASB_BOVIN	200	224
NAVPITPTLN	0	0	0	0	0	0	sp|P02663|CASA2_BOVIN	130	139
NAVPITPTLNRE	0	0	0	0	0	0	sp|P02663|CASA2_BOVIN	130	141
NAVPITPTLNREQL	0	0	0	0	0	0	sp|P02663|CASA2_BOVIN	130	143
NAVPITPTLNREQLSTSEENSK	0	1	0	0	0	0	sp|P02663|CASA2_BOVIN	130	151
NAVPITPTLNREQLSTSEENSK	0	2	0	0	0	0	sp|P02663|CASA2_BOVIN	130	151
NAVPITPTLNREQLSTSEENSK	0	0	0	0	0	0	sp|P02663|CASA2_BOVIN	130	151
NAVPITPTLNREQLSTSEENSKK	0	2	0	0	0	0	sp|P02663|CASA2_BOVIN	130	152
NAVPITPTLNREQLSTSEENSKKTVD	0	2	0	0	0	0	sp|P02663|CASA2_BOVIN	130	155
NAVPITPTLNREQLSTSEENSKKTVDMESTEVFTK	0	3	0	0	0	0	sp|P02663|CASA2_BOVIN	130	164
NEINQFYQKFPQ	0	0	0	0	0	0	sp|P02663|CASA2_BOVIN	98	109
NEINQFYQKFPQY	0	0	0	0	0	0	sp|P02663|CASA2_BOVIN	98	110
NEINQFYQKFPQYL	0	0	0	0	0	0	sp|P02663|CASA2_BOVIN	98	111
NEINQFYQKFPQYLQ	0	0	0	0	0	0	sp|P02663|CASA2_BOVIN	98	112
NEINQFYQKFPQYLQ	0	0	0	0	0	1	sp|P02663|CASA2_BOVIN	98	112
NEINQFYQKFPQYLQY	0	0	0	0	0	0	sp|P02663|CASA2_BOVIN	98	113
NEINQFYQKFPQYLQYL	0	0	0	0	0	0	sp|P02663|CASA2_BOVIN	98	114
NEINQFYQKFPQYLQYLY	0	0	0	0	0	0	sp|P02663|CASA2_BOVIN	98	115
NEINQFYQKFPQYLQYLYQGPIVLNPWDQVK	0	0	0	0	0	0	sp|P02663|CASA2_BOVIN	98	128
NEINQFYQKFPQYLQYLYQGPIVLNPWDQVK	0	0	0	0	0	1	sp|P02663|CASA2_BOVIN	98	128
NEINQFYQKFPQYLQYLYQGPIVLNPWDQVKR	0	0	0	0	0	1	sp|P02663|CASA2_BOVIN	98	129
NEINQFYQKFPQYLQYLYQGPIVLNPWDQVKR	0	0	0	0	0	0	sp|P02663|CASA2_BOVIN	98	129
NEINQFYQKFPQYLQYLYQGPIVLNPWDQVKRN	0	0	0	0	0	2	sp|P02663|CASA2_BOVIN	98	130
NEINQFYQKFPQYLQYLYQGPIVLNPWDQVKRN	0	0	0	0	0	1	sp|P02663|CASA2_BOVIN	98	130
NEINQFYQKFPQYLQYLYQGPIVLNPWDQVKRNAVPITPT	0	0	0	0	0	2	sp|P02663|CASA2_BOVIN	98	137
NEINQFYQKFPQYLQYLYQGPIVLNPWDQVKRNAVPITPT	0	0	0	0	0	1	sp|P02663|CASA2_BOVIN	98	137
NENLLRFF	0	0	0	0	0	0	sp|P02662|CASA1_BOVIN	32	39
NENLLRFFVAPFPEVF	0	0	0	0	0	0	sp|P02662|CASA1_BOVIN	32	47
NFLKKISQ	0	0	0	0	0	0	sp|P02663|CASA2_BOVIN	177	184
NFLKKISQR	0	0	0	0	0	0	sp|P02663|CASA2_BOVIN	177	185
NFLKKISQRY	0	0	0	0	0	0	sp|P02663|CASA2_BOVIN	177	186
NFLKKISQRYQ	0	0	0	0	0	0	sp|P02663|CASA2_BOVIN	177	187
NGVLYLQAGQ	0	0	0	0	0	0	tr|E1B7Z9|E1B7Z9_BOVIN	303	312
NIPPLTQTPV	0	0	0	0	0	0	sp|P02666|CASB_BOVIN	88	97
NIPPLTQTPVVVPPF	0	0	0	0	0	0	sp|P02666|CASB_BOVIN	88	102
NIPPLTQTPVVVPPFLQPE	0	0	0	0	0	0	sp|P02666|CASB_BOVIN	88	106
NIPPLTQTPVVVPPFLQPEVM	0	0	0	0	0	0	sp|P02666|CASB_BOVIN	88	108
NIPPLTQTPVVVPPFLQPEVMG	0	0	0	0	0	0	sp|P02666|CASB_BOVIN	88	109
NIPPLTQTPVVVPPFLQPEVMGV	0	0	0	0	0	0	sp|P02666|CASB_BOVIN	88	110
NIPPLTQTPVVVPPFLQPEVMGV	0	0	1	0	0	0	sp|P02666|CASB_BOVIN	88	110
NIPPLTQTPVVVPPFLQPEVMGVSK	0	0	0	0	0	0	sp|P02666|CASB_BOVIN	88	112
NIPPLTQTPVVVPPFLQPEVMGVSK	0	0	0	0	0	1	sp|P02666|CASB_BOVIN	88	112
NIPPLTQTPVVVPPFLQPEVMGVSK	0	0	0	0	0	2	sp|P02666|CASB_BOVIN	88	112
NIPPLTQTPVVVPPFLQPEVMGVSKVK	0	0	1	0	0	0	sp|P02666|CASB_BOVIN	88	114
NIPPLTQTPVVVPPFLQPEVMGVSKVK	0	0	0	0	0	0	sp|P02666|CASB_BOVIN	88	114
NIPPLTQTPVVVPPFLQPEVMGVSKVK	0	0	0	0	0	1	sp|P02666|CASB_BOVIN	88	114
NIPPLTQTPVVVPPFLQPEVMGVSKVKEA	0	0	0	0	0	0	sp|P02666|CASB_BOVIN	88	116
NIPPLTQTPVVVPPFLQPEVMGVSKVKEA	0	0	0	0	0	1	sp|P02666|CASB_BOVIN	88	116
NIPPLTQTPVVVPPFLQPEVMGVSKVKEA	0	0	0	0	0	2	sp|P02666|CASB_BOVIN	88	116
NIPPLTQTPVVVPPFLQPEVMGVSKVKEAMAPK	0	0	1	0	0	0	sp|P02666|CASB_BOVIN	88	120
NIPPLTQTPVVVPPFLQPEVMGVSKVKEAMAPK	0	0	0	0	0	1	sp|P02666|CASB_BOVIN	88	120
NIPPLTQTPVVVPPFLQPEVMGVSKVKEAMAPK	0	0	0	0	0	0	sp|P02666|CASB_BOVIN	88	120
NIPPLTQTPVVVPPFLQPEVMGVSKVKEAMAPK	0	0	0	0	0	2	sp|P02666|CASB_BOVIN	88	120
NIPPLTQTPVVVPPFLQPEVMGVSKVKEAMAPKHK	0	0	0	0	0	1	sp|P02666|CASB_BOVIN	88	122
NIPPLTQTPVVVPPFLQPEVMGVSKVKEAMAPKHK	0	0	0	0	0	0	sp|P02666|CASB_BOVIN	88	122
NKKIEKFQSEE	0	1	0	0	0	0	sp|P02666|CASB_BOVIN	42	52
NKKIEKFQSEEQQ	0	1	0	0	0	0	sp|P02666|CASB_BOVIN	42	54
NKKIEKFQSEEQQQ	0	1	0	0	0	0	sp|P02666|CASB_BOVIN	42	55
NKKIEKFQSEEQQQTE	0	1	0	0	0	0	sp|P02666|CASB_BOVIN	42	57
NKKIEKFQSEEQQQTED	0	1	0	0	0	0	sp|P02666|CASB_BOVIN	42	58
NKKIEKFQSEEQQQTEDEL	0	1	0	0	0	0	sp|P02666|CASB_BOVIN	42	60
NKKIEKFQSEEQQQTEDELQ	0	1	0	0	0	0	sp|P02666|CASB_BOVIN	42	61
NKKIEKFQSEEQQQTEDELQDK	0	1	0	0	0	0	sp|P02666|CASB_BOVIN	42	63
NKKIEKFQSEEQQQTEDELQDKIHPF	0	1	0	0	0	0	sp|P02666|CASB_BOVIN	42	67
NKKIEKFQSEEQQQTEDELQDKIHPF	0	2	0	0	0	0	sp|P02666|CASB_BOVIN	42	67
NKKIEKFQSEEQQQTEDELQDKIHPFA	0	1	0	0	0	0	sp|P02666|CASB_BOVIN	42	68
NKKIEKFQSEEQQQTEDELQDKIHPFAQT	0	1	0	0	0	0	sp|P02666|CASB_BOVIN	42	70
NKKIEKFQSEEQQQTEDELQDKIHPFAQTQ	0	1	0	0	0	0	sp|P02666|CASB_BOVIN	42	71
NKPEDETHL	0	0	0	0	0	0	sp|P80195|GLCM1_BOVIN	21	29
NKPEDETHLE	0	0	0	0	0	0	sp|P80195|GLCM1_BOVIN	21	30
NLHLPLPLLQ	0	0	0	0	0	0	sp|P02666|CASB_BOVIN	147	156
NLHLPLPLLQ	0	0	0	0	0	1	sp|P02666|CASB_BOVIN	147	156
NLHLPLPLLQS	0	0	0	0	0	0	sp|P02666|CASB_BOVIN	147	157
NLHLPLPLLQSW	0	0	0	0	0	0	sp|P02666|CASB_BOVIN	147	158
NLHLPLPLLQSWMHQPHQPLPPT	0	0	0	0	0	0	sp|P02666|CASB_BOVIN	147	169
NLHLPLPLLQSWMHQPHQPLPPT	0	0	0	0	0	1	sp|P02666|CASB_BOVIN	147	169
NLHLPLPLLQSWMHQPHQPLPPTVMFPPQ	0	0	0	0	0	1	sp|P02666|CASB_BOVIN	147	175
NLHLPLPLLQSWMHQPHQPLPPTVMFPPQSVL	0	0	0	0	0	1	sp|P02666|CASB_BOVIN	147	178
NMAINPSKE	0	0	1	0	0	0	sp|P02663|CASA2_BOVIN	40	48
NMAINPSKE	0	0	0	0	0	0	sp|P02663|CASA2_BOVIN	40	48
NMAINPSKE	0	0	0	0	0	1	sp|P02663|CASA2_BOVIN	40	48
NMAINPSKENL	0	0	0	0	0	0	sp|P02663|CASA2_BOVIN	40	50
NMAINPSKENLCSTFCKEVVR	0	0	0	0	0	1	sp|P02663|CASA2_BOVIN	40	60
NMAINPSKENLCSTFCKEVVR	0	1	0	0	0	0	sp|P02663|CASA2_BOVIN	40	60
NMAINPSKENLCSTFCKEVVR	0	0	0	0	0	0	sp|P02663|CASA2_BOVIN	40	60
NMAINPSKENLCSTFCKEVVRNANEEE	0	0	0	0	0	1	sp|P02663|CASA2_BOVIN	40	66
NNQFLPYPYYAKPA	0	0	0	0	0	0	sp|P02668|CASK_BOVIN	73	86
NPIGSENSEKT	0	0	0	0	0	0	sp|P02662|CASA1_BOVIN	199	209
NPIGSENSEKT	0	0	0	0	0	1	sp|P02662|CASA1_BOVIN	199	209
NPWDQVK	0	0	0	0	0	0	sp|P02663|CASA2_BOVIN	122	128
NPWDQVKR	0	0	0	0	0	0	sp|P02663|CASA2_BOVIN	122	129
NPWDQVKRN	0	0	0	0	0	0	sp|P02663|CASA2_BOVIN	122	130
NQFLPYPYYAKPA	0	0	0	0	0	0	sp|P02668|CASK_BOVIN	74	86
NQFLPYPYYAKPAAV	0	0	0	0	0	0	sp|P02668|CASK_BOVIN	74	88
NREQLSTSEENSK	0	2	0	0	0	0	sp|P02663|CASA2_BOVIN	139	151
NREQLSTSEENSK	0	1	0	0	0	0	sp|P02663|CASA2_BOVIN	139	151
NREQLSTSEENSK	0	0	0	0	0	0	sp|P02663|CASA2_BOVIN	139	151
NREQLSTSEENSKK	0	0	0	0	0	0	sp|P02663|CASA2_BOVIN	139	152
NREQLSTSEENSKK	0	1	0	0	0	0	sp|P02663|CASA2_BOVIN	139	152
NREQLSTSEENSKK	0	2	0	0	0	0	sp|P02663|CASA2_BOVIN	139	152
NREQLSTSEENSKKT	0	2	0	0	0	0	sp|P02663|CASA2_BOVIN	139	153
NREQLSTSEENSKKTVD	0	1	0	0	0	0	sp|P02663|CASA2_BOVIN	139	155
NREQLSTSEENSKKTVD	0	2	0	0	0	0	sp|P02663|CASA2_BOVIN	139	155
NREQLSTSEENSKKTVDMESTEVFTK	0	3	0	0	0	0	sp|P02663|CASA2_BOVIN	139	164
NREQLSTSEENSKKTVDMESTEVFTKK	0	2	0	0	0	0	sp|P02663|CASA2_BOVIN	139	165
NREQLSTSEENSKKTVDMESTEVFTKK	0	3	0	0	0	0	sp|P02663|CASA2_BOVIN	139	165
NREQLSTSEENSKKTVDMESTEVFTKKT	0	3	0	0	0	0	sp|P02663|CASA2_BOVIN	139	166
NREQLSTSEENSKKTVDMESTEVFTKKTK	0	3	0	0	0	0	sp|P02663|CASA2_BOVIN	139	167
NREQLSTSEENSKKTVDMESTEVFTKKTK	0	2	0	0	0	0	sp|P02663|CASA2_BOVIN	139	167
NREQLSTSEENSKKTVDMESTEVFTKKTKLTEEEKNRLN	0	3	0	0	0	0	sp|P02663|CASA2_BOVIN	139	177
NRLNFLKK	0	0	0	0	0	0	sp|P02663|CASA2_BOVIN	174	181
NSAEERLHSM	0	1	0	0	0	0	sp|P02662|CASA1_BOVIN	129	138
NSEKTTMPL	0	0	0	0	0	0	sp|P02662|CASA1_BOVIN	205	213
NSEKTTMPLW	0	0	0	0	0	0	sp|P02662|CASA1_BOVIN	205	214
NVPGEIVESLSSSEESITRINK	0	3	0	0	0	0	sp|P02666|CASB_BOVIN	22	43
NVQTEIVNK	0	0	0	0	0	0	tr|F6R3I5|F6R3I5_BOVIN	36	44
NYYQQKPV	0	0	0	0	0	0	sp|P02668|CASK_BOVIN	62	69
NYYQQKPVA	0	0	0	0	0	0	sp|P02668|CASK_BOVIN	62	70
NYYQQKPVAL	0	0	0	0	0	0	sp|P02668|CASK_BOVIN	62	71
NYYQQKPVALIN	0	0	0	0	0	0	sp|P02668|CASK_BOVIN	62	73
PEVMGVSKVKEAMAPK	0	0	0	0	0	0	sp|P02666|CASB_BOVIN	105	120
PFAQTQSLVYPFPGPIPNSLPQ	0	2	0	0	0	0	sp|P02666|CASB_BOVIN	66	87
PFLQPEVM	0	0	0	0	0	0	sp|P02666|CASB_BOVIN	101	108
PFPEVFGKEKVN	0	0	0	0	0	0	sp|P02662|CASA1_BOVIN	42	53
PFPGPIPNSLPQ	0	0	0	0	0	0	sp|P02666|CASB_BOVIN	76	87
PFPGPIPNSLPQNIPPLTQTPVVVPPFLQPEVM	0	0	0	0	0	2	sp|P02666|CASB_BOVIN	76	108
PFPGPIPNSLPQNIPPLTQTPVVVPPFLQPEVM	0	0	0	0	0	1	sp|P02666|CASB_BOVIN	76	108
PFPKYPVEP	0	0	0	0	0	0	sp|P02666|CASB_BOVIN	125	133
PFPKYPVEPF	0	0	0	0	0	0	sp|P02666|CASB_BOVIN	125	134
PFPKYPVEPFT	0	0	0	0	0	0	sp|P02666|CASB_BOVIN	125	135
PFPKYPVEPFTESQ	0	0	0	0	0	0	sp|P02666|CASB_BOVIN	125	138
PFPKYPVEPFTESQSL	0	0	0	0	0	0	sp|P02666|CASB_BOVIN	125	140
PGEIVESLSSSEESITRINKKIEKFQSEEQQQTEDELQ	0	3	0	0	0	0	sp|P02666|CASB_BOVIN	24	61
PGPIPNSLPQ	0	0	0	0	0	1	sp|P02666|CASB_BOVIN	78	87
PGPIPNSLPQ	0	0	0	0	0	0	sp|P02666|CASB_BOVIN	78	87
PHQPLPPT	0	0	0	0	0	0	sp|P02666|CASB_BOVIN	162	169
PIGSENSEKTTMPLW	0	0	0	0	0	0	sp|P02662|CASA1_BOVIN	200	214
PIVLNPWDQVK	0	0	0	0	0	0	sp|P02663|CASA2_BOVIN	118	128
PIVLNPWDQVKR	0	0	0	0	0	0	sp|P02663|CASA2_BOVIN	118	129
PIVLNPWDQVKRN	0	0	0	0	0	0	sp|P02663|CASA2_BOVIN	118	130
PKHPIKHQGLPQE	0	0	0	0	0	0	sp|P02662|CASA1_BOVIN	17	29
PKYPVEPF	0	0	0	0	0	0	sp|P02666|CASB_BOVIN	127	134
PKYPVEPFTESQ	0	0	0	0	0	0	sp|P02666|CASB_BOVIN	127	138
PLGTQYTDAPS	0	0	0	0	0	0	sp|P02662|CASA1_BOVIN	183	193
PNSAEERLH	0	1	0	0	0	0	sp|P02662|CASA1_BOVIN	128	136
PPFLQPEVM	0	0	0	0	0	0	sp|P02666|CASB_BOVIN	100	108
PPFLQPEVM	0	0	1	0	0	0	sp|P02666|CASB_BOVIN	100	108
PPFLQPEVMGV	0	0	0	0	0	0	sp|P02666|CASB_BOVIN	100	110
PPFLQPEVMGVSKVKEAMA	0	0	1	0	0	0	sp|P02666|CASB_BOVIN	100	118
PPFLQPEVMGVSKVKEAMA	0	1	0	0	0	0	sp|P02666|CASB_BOVIN	100	118
PPFLQPEVMGVSKVKEAMAPKHKEMPFPKYP	0	1	0	0	0	0	sp|P02666|CASB_BOVIN	100	130
PPFLQPEVMGVSKVKEAMAPKHKEMPFPKYPVEP	0	0	1	0	0	0	sp|P02666|CASB_BOVIN	100	133
PPFLQPEVMGVSKVKEAMAPKHKEMPFPKYPVEPF	0	0	0	0	0	0	sp|P02666|CASB_BOVIN	100	134
PPFLQPLDL	0	0	0	0	0	0	tr|F1N4L2|F1N4L2_BOVIN	306	314
PPLTQTPVVVPPFL	0	0	0	0	0	0	sp|P02666|CASB_BOVIN	90	103
PPLTQTPVVVPPFLQ	0	0	0	0	0	1	sp|P02666|CASB_BOVIN	90	104
PPLTQTPVVVPPFLQPEVMGVS	0	0	0	0	0	0	sp|P02666|CASB_BOVIN	90	111
PPLTQTPVVVPPFLQPEVMGVS	0	0	0	0	0	1	sp|P02666|CASB_BOVIN	90	111
PPLTQTPVVVPPFLQPEVMGVSK	0	1	0	0	0	0	sp|P02666|CASB_BOVIN	90	112
PPLTQTPVVVPPFLQPEVMGVSKV	0	0	1	0	0	0	sp|P02666|CASB_BOVIN	90	113
PPLTQTPVVVPPFLQPEVMGVSKV	0	0	0	0	0	0	sp|P02666|CASB_BOVIN	90	113
PPLTQTPVVVPPFLQPEVMGVSKV	0	0	0	0	0	1	sp|P02666|CASB_BOVIN	90	113
PPLTQTPVVVPPFLQPEVMGVSKVKE	0	1	0	0	0	0	sp|P02666|CASB_BOVIN	90	115
PPLTQTPVVVPPFLQPEVMGVSKVKEAMAPKHKE	0	0	0	0	0	0	sp|P02666|CASB_BOVIN	90	123
PPLTQTPVVVPPFLQPEVMGVSKVKEAMAPKHKEM	0	1	0	0	0	0	sp|P02666|CASB_BOVIN	90	124
PPLTQTPVVVPPFLQPEVMGVSKVKEAMAPKHKEM	0	0	0	0	0	0	sp|P02666|CASB_BOVIN	90	124
PPLTQTPVVVPPFLQPEVMGVSKVKEAMAPKHKEM	0	0	0	0	0	1	sp|P02666|CASB_BOVIN	90	124
PPLTQTPVVVPPFLQPEVMGVSKVKEAMAPKHKEMP	0	0	0	0	0	1	sp|P02666|CASB_BOVIN	90	125
PPLTQTPVVVPPFLQPEVMGVSKVKEAMAPKHKEMP	0	0	0	0	0	0	sp|P02666|CASB_BOVIN	90	125
PPLTQTPVVVPPFLQPEVMGVSKVKEAMAPKHKEMP	0	0	1	0	0	0	sp|P02666|CASB_BOVIN	90	125
PPLTQTPVVVPPFLQPEVMGVSKVKEAMAPKHKEMPF	0	0	0	0	0	0	sp|P02666|CASB_BOVIN	90	126
PPLTQTPVVVPPFLQPEVMGVSKVKEAMAPKHKEMPF	0	0	3	0	0	0	sp|P02666|CASB_BOVIN	90	126
PPLTQTPVVVPPFLQPEVMGVSKVKEAMAPKHKEMPFP	0	0	0	0	0	0	sp|P02666|CASB_BOVIN	90	127
PPLTQTPVVVPPFLQPEVMGVSKVKEAMAPKHKEMPFP	0	1	0	0	0	0	sp|P02666|CASB_BOVIN	90	127
PPLTQTPVVVPPFLQPEVMGVSKVKEAMAPKHKEMPFP	0	0	2	0	0	0	sp|P02666|CASB_BOVIN	90	127
PPLTQTPVVVPPFLQPEVMGVSKVKEAMAPKHKEMPFP	0	0	1	0	0	0	sp|P02666|CASB_BOVIN	90	127
PPLTQTPVVVPPFLQPEVMGVSKVKEAMAPKHKEMPFP	0	0	0	0	0	1	sp|P02666|CASB_BOVIN	90	127
PPLTQTPVVVPPFLQPEVMGVSKVKEAMAPKHKEMPFPK	0	0	0	0	0	0	sp|P02666|CASB_BOVIN	90	128
PPLTQTPVVVPPFLQPEVMGVSKVKEAMAPKHKEMPFPK	0	0	1	0	0	0	sp|P02666|CASB_BOVIN	90	128
PPLTQTPVVVPPFLQPEVMGVSKVKEAMAPKHKEMPFPKY	0	0	1	0	0	0	sp|P02666|CASB_BOVIN	90	129
PPLTQTPVVVPPFLQPEVMGVSKVKEAMAPKHKEMPFPKYPVEP	0	0	2	0	0	0	sp|P02666|CASB_BOVIN	90	133
PPPLPDK	0	0	0	0	0	0	tr|E1B718|E1B718_BOVIN	479	485
PPPPPPPPPPPPPPSAPPQVQLPVS	0	0	0	0	0	0	tr|F1MPW8|F1MPW8_BOVIN	2016	2040
PQLEIVPNSAEERLH	0	1	0	0	0	0	sp|P02662|CASA1_BOVIN	122	136
PQLEIVPNSAEERLHSM	0	1	0	0	0	0	sp|P02662|CASA1_BOVIN	122	138
PQLEIVPNSAEERLHSMKEGIHAQ	0	1	0	0	0	0	sp|P02662|CASA1_BOVIN	122	145
PQRDMPIQA	0	0	0	0	0	0	sp|P02666|CASB_BOVIN	196	204
PQRDMPIQAF	0	0	0	0	0	0	sp|P02666|CASB_BOVIN	196	205
PQRDMPIQAFLL	0	0	0	0	0	0	sp|P02666|CASB_BOVIN	196	207
PQRDMPIQAFLLYQEPVLGPVRGPFPIIV	0	0	0	0	0	1	sp|P02666|CASB_BOVIN	196	224
PQRDMPIQAFLLYQEPVLGPVRGPFPIIV	0	0	0	0	0	0	sp|P02666|CASB_BOVIN	196	224
PQYLQYLYQGPIVLNPWDQVKR	0	0	0	0	0	2	sp|P02663|CASA2_BOVIN	108	129
PSFSDIPNPIGSENSEKTTMPLW	0	0	0	0	0	0	sp|P02662|CASA1_BOVIN	192	214
PSGAWYYVPLGTQYTDAPSFSDIPNPIGSE	0	3	0	0	0	0	sp|P02662|CASA1_BOVIN	175	204
PTPGPPLIPVPVGPASFSAPPIP	0	0	0	0	0	0	sp|A6H7I5|DYN2_BOVIN	783	805
PVEARLAALLPDLLVF	0	0	0	0	0	0	tr|E1BL39|E1BL39_BOVIN	14	29
PVEPFTESQ	0	0	0	0	0	0	sp|P02666|CASB_BOVIN	130	138
PVEPFTESQSLTLTDVENLHLPLPLLQS	0	0	0	0	0	1	sp|P02666|CASB_BOVIN	130	157
PVLGPVRGPFP	0	0	0	0	0	0	sp|P02666|CASB_BOVIN	211	221
PVLGPVRGPFPI	0	0	0	0	0	0	sp|P02666|CASB_BOVIN	211	222
PVLGPVRGPFPIIV	0	0	0	0	0	0	sp|P02666|CASB_BOVIN	211	224
PVPQKAVPYPQ	0	0	0	0	0	0	sp|P02666|CASB_BOVIN	187	197
PVVVPPFLQP	0	0	0	0	0	0	sp|P02666|CASB_BOVIN	96	105
PVVVPPFLQPE	0	0	0	0	0	0	sp|P02666|CASB_BOVIN	96	106
PVVVPPFLQPEVM	0	0	1	0	0	0	sp|P02666|CASB_BOVIN	96	108
PVVVPPFLQPEVM	0	0	0	0	0	0	sp|P02666|CASB_BOVIN	96	108
PVVVPPFLQPEVM	0	0	0	0	0	1	sp|P02666|CASB_BOVIN	96	108
PVVVPPFLQPEVMG	0	0	0	0	0	0	sp|P02666|CASB_BOVIN	96	109
PVVVPPFLQPEVMG	0	0	1	0	0	0	sp|P02666|CASB_BOVIN	96	109
PWDAEETLPAEKAEVCPWEVSAGAGERRALGMEA	0	0	1	0	0	0	tr|E1B9D3|E1B9D3_BOVIN	1696	1729
PWDQVK	0	0	0	0	0	0	sp|P02663|CASA2_BOVIN	123	128
PWDQVKR	0	0	0	0	0	0	sp|P02663|CASA2_BOVIN	123	129
PWDQVKRN	0	0	0	0	0	0	sp|P02663|CASA2_BOVIN	123	130
PWIQPKT	0	0	0	0	0	0	sp|P02663|CASA2_BOVIN	207	213
PWIQPKTK	0	0	0	0	0	0	sp|P02663|CASA2_BOVIN	207	214
PWIQPKTKV	0	0	0	0	0	0	sp|P02663|CASA2_BOVIN	207	215
PWIQPKTKVIPY	0	0	0	0	0	0	sp|P02663|CASA2_BOVIN	207	218
PYPQRDMPIQ	0	0	0	0	0	0	sp|P02666|CASB_BOVIN	194	203
PYPQRDMPIQA	0	0	0	0	0	0	sp|P02666|CASB_BOVIN	194	204
PYPQRDMPIQAFLLYQEPVLGPVRGPFPIIV	0	0	0	0	0	0	sp|P02666|CASB_BOVIN	194	224
QAFLLYQEPVLGPVRGPFPIIV	0	0	0	0	1	0	sp|P02666|CASB_BOVIN	203	224
QAFLLYQEPVLGPVRGPFPIIV	0	0	0	0	1	1	sp|P02666|CASB_BOVIN	203	224
QAMEDIKQ	0	0	0	0	0	0	sp|P02662|CASA1_BOVIN	67	74
QAMEDIKQ	0	0	0	0	1	0	sp|P02662|CASA1_BOVIN	67	74
QAMEDIKQM	0	0	0	0	0	0	sp|P02662|CASA1_BOVIN	67	75
QAQPTTMARHPHPHLSF	0	0	0	0	1	0	sp|P02668|CASK_BOVIN	110	126
QDKIHPF	0	0	0	0	0	1	sp|P02666|CASB_BOVIN	61	67
QDKIHPFAQTQ	0	0	0	0	1	0	sp|P02666|CASB_BOVIN	61	71
QDKIHPFAQTQSLVYPFPGPIPN	0	0	0	0	0	0	sp|P02666|CASB_BOVIN	61	83
QDKTEIPTIN	0	0	0	0	1	0	sp|P02668|CASK_BOVIN	135	144
QEKNMAINPS	0	0	0	0	1	0	sp|P02663|CASA2_BOVIN	37	46
QEKNMAINPSKENLCSTFCKEVVR	0	0	0	0	1	0	sp|P02663|CASA2_BOVIN	37	60
QEKNMAINPSKENLCSTFCKEVVRN	0	1	0	0	1	0	sp|P02663|CASA2_BOVIN	37	61
QEKNMAINPSKENLCSTFCKEVVRNANEEE	0	0	0	0	1	1	sp|P02663|CASA2_BOVIN	37	66
QEKNMAINPSKENLCSTFCKEVVRNANEEE	0	0	0	0	1	0	sp|P02663|CASA2_BOVIN	37	66
QELAYFYPELF	0	0	0	0	0	0	sp|P02662|CASA1_BOVIN	155	165
QELAYFYPELF	0	0	0	0	1	0	sp|P02662|CASA1_BOVIN	155	165
QELAYFYPELFR	0	0	0	0	0	0	sp|P02662|CASA1_BOVIN	155	166
QELAYFYPELFRQ	0	0	0	0	0	0	sp|P02662|CASA1_BOVIN	155	167
QELAYFYPELFRQF	0	0	0	0	1	0	sp|P02662|CASA1_BOVIN	155	168
QEPVLGPV	0	0	0	0	0	0	sp|P02666|CASB_BOVIN	209	216
QEPVLGPVR	0	0	0	0	0	0	sp|P02666|CASB_BOVIN	209	217
QEPVLGPVR	0	0	0	0	1	0	sp|P02666|CASB_BOVIN	209	217
QEPVLGPVRGP	0	0	0	0	0	0	sp|P02666|CASB_BOVIN	209	219
QEPVLGPVRGPFP	0	0	0	0	0	0	sp|P02666|CASB_BOVIN	209	221
QEPVLGPVRGPFP	0	0	0	0	0	1	sp|P02666|CASB_BOVIN	209	221
QEPVLGPVRGPFP	0	0	0	0	1	0	sp|P02666|CASB_BOVIN	209	221
QEPVLGPVRGPFPI	0	0	0	0	0	0	sp|P02666|CASB_BOVIN	209	222
QEPVLGPVRGPFPI	0	0	0	0	1	0	sp|P02666|CASB_BOVIN	209	222
QEPVLGPVRGPFPI	0	0	0	0	0	1	sp|P02666|CASB_BOVIN	209	222
QEPVLGPVRGPFPII	0	0	0	0	0	0	sp|P02666|CASB_BOVIN	209	223
QEPVLGPVRGPFPII	0	0	0	0	1	0	sp|P02666|CASB_BOVIN	209	223
QEPVLGPVRGPFPIIV	0	0	0	0	0	0	sp|P02666|CASB_BOVIN	209	224
QEPVLGPVRGPFPIIV	0	0	0	0	1	0	sp|P02666|CASB_BOVIN	209	224
QEPVLGPVRGPFPIIV	0	0	0	0	1	1	sp|P02666|CASB_BOVIN	209	224
QEQDGVGGAQDQ	0	0	0	0	0	0	sp|Q28181|CNGB1_BOVIN	543	554
QFLPYPYYAKPA	0	0	0	0	1	0	sp|P02668|CASK_BOVIN	75	86
QFYQKFPQY	0	0	0	0	1	0	sp|P02663|CASA2_BOVIN	102	110
QFYQKFPQYLQ	0	0	0	0	1	0	sp|P02663|CASA2_BOVIN	102	112
QFYQKFPQYLQYLYQGPIVLNPWDQVKR	0	0	0	0	0	0	sp|P02663|CASA2_BOVIN	102	129
QFYQKFPQYLQYLYQGPIVLNPWDQVKR	0	0	0	0	1	1	sp|P02663|CASA2_BOVIN	102	129
QGLPQEVLNENLLRF	0	0	0	0	0	0	sp|P02662|CASA1_BOVIN	24	38
QGPIVLNPWDQVK	0	0	0	0	0	0	sp|P02663|CASA2_BOVIN	116	128
QGPIVLNPWDQVK	0	0	0	0	1	0	sp|P02663|CASA2_BOVIN	116	128
QGPIVLNPWDQVK	0	0	0	0	1	1	sp|P02663|CASA2_BOVIN	116	128
QGPIVLNPWDQVKR	0	0	0	0	0	0	sp|P02663|CASA2_BOVIN	116	129
QGPIVLNPWDQVKR	0	0	0	0	0	1	sp|P02663|CASA2_BOVIN	116	129
QGPIVLNPWDQVKR	0	0	0	0	1	0	sp|P02663|CASA2_BOVIN	116	129
QGPIVLNPWDQVKRN	0	0	0	0	0	0	sp|P02663|CASA2_BOVIN	116	130
QGPIVLNPWDQVKRN	0	0	0	0	0	1	sp|P02663|CASA2_BOVIN	116	130
QGPIVLNPWDQVKRN	0	0	0	0	1	0	sp|P02663|CASA2_BOVIN	116	130
QGPIVLNPWDQVKRN	0	0	0	0	1	1	sp|P02663|CASA2_BOVIN	116	130
QHQKAMKPW	0	0	0	0	1	0	sp|P02663|CASA2_BOVIN	200	208
QHQKAMKPWIQPK	0	0	1	0	1	0	sp|P02663|CASA2_BOVIN	200	212
QHQKAMKPWIQPK	0	0	0	0	0	0	sp|P02663|CASA2_BOVIN	200	212
QHQKAMKPWIQPK	0	0	0	0	1	0	sp|P02663|CASA2_BOVIN	200	212
QHQKAMKPWIQPKT	0	0	0	0	1	0	sp|P02663|CASA2_BOVIN	200	213
QHQKAMKPWIQPKTKVIP	0	0	0	0	1	1	sp|P02663|CASA2_BOVIN	200	217
QHQKAMKPWIQPKTKVIP	0	0	0	0	1	0	sp|P02663|CASA2_BOVIN	200	217
QHSFQPLEPKP	0	0	0	0	0	0	tr|G3N091|G3N091_BOVIN	655	665
QKAMKPW	0	0	0	0	1	0	sp|P02663|CASA2_BOVIN	202	208
QKAMKPWIQPK	0	0	1	0	1	0	sp|P02663|CASA2_BOVIN	202	212
QKAMKPWIQPK	0	0	0	0	0	0	sp|P02663|CASA2_BOVIN	202	212
QKAMKPWIQPK	0	0	0	0	1	0	sp|P02663|CASA2_BOVIN	202	212
QKAMKPWIQPKT	0	0	0	0	1	0	sp|P02663|CASA2_BOVIN	202	213
QKAVPYPQRDMPIQAF	0	0	0	0	1	0	sp|P02666|CASB_BOVIN	190	205
QKEDVPSER	0	0	0	0	1	0	sp|P02662|CASA1_BOVIN	97	105
QKEDVPSERY	0	0	0	0	1	0	sp|P02662|CASA1_BOVIN	97	106
QKEDVPSERYL	0	0	0	0	0	0	sp|P02662|CASA1_BOVIN	97	107
QKEDVPSERYL	0	0	0	0	0	1	sp|P02662|CASA1_BOVIN	97	107
QKEDVPSERYL	0	0	0	0	1	0	sp|P02662|CASA1_BOVIN	97	107
QKEDVPSERYLG	0	0	0	0	0	0	sp|P02662|CASA1_BOVIN	97	108
QKEDVPSERYLG	0	0	0	0	1	0	sp|P02662|CASA1_BOVIN	97	108
QKEPMIGV	0	0	0	0	1	0	sp|P02662|CASA1_BOVIN	146	153
QKEPMIGVN	0	0	0	0	0	0	sp|P02662|CASA1_BOVIN	146	154
QKEPMIGVN	0	0	1	0	1	0	sp|P02662|CASA1_BOVIN	146	154
QKEPMIGVN	0	0	0	0	1	0	sp|P02662|CASA1_BOVIN	146	154
QKEPMIGVNQ	0	0	0	0	1	0	sp|P02662|CASA1_BOVIN	146	155
QKEPMIGVNQ	0	0	0	0	0	0	sp|P02662|CASA1_BOVIN	146	155
QKEPMIGVNQE	0	0	0	0	0	0	sp|P02662|CASA1_BOVIN	146	156
QKEPMIGVNQEL	0	0	0	0	1	0	sp|P02662|CASA1_BOVIN	146	157
QKEPMIGVNQEL	0	0	0	0	0	0	sp|P02662|CASA1_BOVIN	146	157
QKEPMIGVNQELA	0	0	0	0	1	0	sp|P02662|CASA1_BOVIN	146	158
QKEPMIGVNQELAY	0	0	0	0	1	0	sp|P02662|CASA1_BOVIN	146	159
QKEPMIGVNQELAYFYPE	0	0	0	0	1	0	sp|P02662|CASA1_BOVIN	146	163
QKEPMIGVNQELAYFYPE	0	0	0	0	0	0	sp|P02662|CASA1_BOVIN	146	163
QKEPMIGVNQELAYFYPELFR	0	0	0	0	0	0	sp|P02662|CASA1_BOVIN	146	166
QKEPMIGVNQELAYFYPELFRQ	0	0	0	0	0	0	sp|P02662|CASA1_BOVIN	146	167
QKEPMIGVNQELAYFYPELFRQ	0	0	0	0	1	0	sp|P02662|CASA1_BOVIN	146	167
QKEPMIGVNQELAYFYPELFRQF	0	0	0	0	0	0	sp|P02662|CASA1_BOVIN	146	168
QKEPMIGVNQELAYFYPELFRQF	0	0	0	0	1	0	sp|P02662|CASA1_BOVIN	146	168
QKEPMIGVNQELAYFYPELFRQFYQL	0	0	0	0	0	0	sp|P02662|CASA1_BOVIN	146	171
QKEPMIGVNQELAYFYPELFRQFYQL	0	0	0	0	1	0	sp|P02662|CASA1_BOVIN	146	171
QKEPMIGVNQELAYFYPELFRQFYQLDAYPS	0	0	0	0	0	2	sp|P02662|CASA1_BOVIN	146	176
QKEPMIGVNQELAYFYPELFRQFYQLDAYPS	0	0	0	0	0	1	sp|P02662|CASA1_BOVIN	146	176
QKEPMIGVNQELAYFYPELFRQFYQLDAYPS	0	0	0	0	1	1	sp|P02662|CASA1_BOVIN	146	176
QKEPMIGVNQELAYFYPELFRQFYQLDAYPS	0	0	0	0	1	0	sp|P02662|CASA1_BOVIN	146	176
QKFALPQYL	0	0	0	0	1	0	sp|P02663|CASA2_BOVIN	187	195
QKFALPQYL	0	0	0	0	0	0	sp|P02663|CASA2_BOVIN	187	195
QKFALPQYLK	0	0	0	0	1	0	sp|P02663|CASA2_BOVIN	187	196
QKFALPQYLKT	0	0	0	0	0	0	sp|P02663|CASA2_BOVIN	187	197
QKFALPQYLKT	0	0	0	0	1	0	sp|P02663|CASA2_BOVIN	187	197
QKFALPQYLKTVYQHQ	0	0	0	0	0	0	sp|P02663|CASA2_BOVIN	187	202
QKFALPQYLKTVYQHQ	0	0	0	0	1	0	sp|P02663|CASA2_BOVIN	187	202
QKFPQYLQ	0	0	0	0	1	0	sp|P02663|CASA2_BOVIN	105	112
QKFPQYLQYLYQGPIVLNPWDQVKR	0	0	0	0	0	0	sp|P02663|CASA2_BOVIN	105	129
QKHIQKEDVPS	0	0	0	0	1	0	sp|P02662|CASA1_BOVIN	93	103
QKHIQKEDVPSER	0	0	0	0	0	1	sp|P02662|CASA1_BOVIN	93	105
QKHIQKEDVPSER	0	0	0	0	0	0	sp|P02662|CASA1_BOVIN	93	105
QKHIQKEDVPSERYL	0	0	0	0	0	0	sp|P02662|CASA1_BOVIN	93	107
QLDAYPSGAW	0	0	0	0	0	0	sp|P02662|CASA1_BOVIN	170	179
QLDAYPSGAWY	0	0	0	0	0	0	sp|P02662|CASA1_BOVIN	170	180
QLDAYPSGAWYYVPL	0	0	0	0	1	0	sp|P02662|CASA1_BOVIN	170	184
QLEIVPNSAEER	0	1	0	0	0	0	sp|P02662|CASA1_BOVIN	123	134
QLEIVPNSAEERLH	0	0	0	0	0	0	sp|P02662|CASA1_BOVIN	123	136
QLEIVPNSAEERLH	0	1	0	0	0	0	sp|P02662|CASA1_BOVIN	123	136
QLEIVPNSAEERLH	0	1	0	0	1	0	sp|P02662|CASA1_BOVIN	123	136
QLEIVPNSAEERLHSM	0	1	0	0	0	0	sp|P02662|CASA1_BOVIN	123	138
QLEIVPNSAEERLHSM	0	0	0	0	1	0	sp|P02662|CASA1_BOVIN	123	138
QLEIVPNSAEERLHSM	0	1	0	0	1	0	sp|P02662|CASA1_BOVIN	123	138
QLEIVPNSAEERLHSMK	0	1	0	0	0	0	sp|P02662|CASA1_BOVIN	123	139
QLEIVPNSAEERLHSMK	0	1	0	0	1	0	sp|P02662|CASA1_BOVIN	123	139
QLEIVPNSAEERLHSMKEGIH	0	1	0	0	1	0	sp|P02662|CASA1_BOVIN	123	143
QLEIVPNSAEERLHSMKEGIHA	0	1	0	0	0	0	sp|P02662|CASA1_BOVIN	123	144
QLEIVPNSAEERLHSMKEGIHAQ	0	1	0	0	0	0	sp|P02662|CASA1_BOVIN	123	145
QLEIVPNSAEERLHSMKEGIHAQ	0	1	0	0	1	0	sp|P02662|CASA1_BOVIN	123	145
QLSTSEENSKK	0	2	0	0	1	0	sp|P02663|CASA2_BOVIN	142	152
QLSTSEENSKK	0	1	0	0	1	0	sp|P02663|CASA2_BOVIN	142	152
QLSTSEENSKKTVD	0	2	0	0	1	0	sp|P02663|CASA2_BOVIN	142	155
QLSTSEENSKKTVDMESTEVFTKK	0	3	0	0	0	0	sp|P02663|CASA2_BOVIN	142	165
QMQQAPAPMPQPPPP	0	0	1	0	1	0	tr|E1BNS3|E1BNS3_BOVIN	745	759
QNQEQPIR	0	0	0	0	1	0	sp|P02668|CASK_BOVIN	24	31
QPEVMGVSKVK	0	0	0	0	0	0	sp|P02666|CASB_BOVIN	104	114
QPEVMGVSKVK	0	0	0	0	1	0	sp|P02666|CASB_BOVIN	104	114
QPHQPLPPT	0	0	0	0	1	0	sp|P02666|CASB_BOVIN	161	169
QPHQPLPPTVM	0	0	0	0	0	0	sp|P02666|CASB_BOVIN	161	171
QPHQPLPPTVM	0	0	0	0	1	0	sp|P02666|CASB_BOVIN	161	171
QPHQPLPPTVMFPPQ	0	0	0	0	0	0	sp|P02666|CASB_BOVIN	161	175
QPHQPLPPTVMFPPQ	0	0	0	0	1	0	sp|P02666|CASB_BOVIN	161	175
QPKTKVIPY	0	0	0	0	0	0	sp|P02663|CASA2_BOVIN	210	218
QPKTKVIPY	0	0	0	0	1	0	sp|P02663|CASA2_BOVIN	210	218
QQKEPMIGVN	0	0	1	0	1	0	sp|P02662|CASA1_BOVIN	145	154
QQKEPMIGVN	0	0	0	0	1	0	sp|P02662|CASA1_BOVIN	145	154
QQKEPMIGVN	0	0	0	0	0	0	sp|P02662|CASA1_BOVIN	145	154
QQKEPMIGVNQ	0	0	0	0	1	0	sp|P02662|CASA1_BOVIN	145	155
QQKEPMIGVNQELAY	0	0	0	0	1	0	sp|P02662|CASA1_BOVIN	145	159
QQKEPMIGVNQELAYFYPELFRQ	0	0	0	0	1	0	sp|P02662|CASA1_BOVIN	145	167
QQKEPMIGVNQELAYFYPELFRQFYQL	0	0	0	0	1	0	sp|P02662|CASA1_BOVIN	145	171
QQQQQPPPPPMPANGQ	0	0	0	0	0	0	tr|Q2KJ42|Q2KJ42_BOVIN	30	45
QQQTEDELQDK	0	0	0	0	0	0	sp|P02666|CASB_BOVIN	53	63
QQQTEDELQDKIHPF	0	0	0	0	1	0	sp|P02666|CASB_BOVIN	53	67
QQTEDELQDK	0	0	0	0	0	0	sp|P02666|CASB_BOVIN	54	63
QQTEDELQDKIHPF	0	0	0	0	0	0	sp|P02666|CASB_BOVIN	54	67
QQTEDELQDKIHPF	0	0	0	0	1	0	sp|P02666|CASB_BOVIN	54	67
QRDMPIQA	0	0	0	0	0	0	sp|P02666|CASB_BOVIN	197	204
QRDMPIQA	0	0	0	0	1	0	sp|P02666|CASB_BOVIN	197	204
QRDMPIQAF	0	0	0	0	0	0	sp|P02666|CASB_BOVIN	197	205
QRDMPIQAFL	0	0	0	0	1	0	sp|P02666|CASB_BOVIN	197	206
QRDMPIQAFLL	0	0	0	0	1	0	sp|P02666|CASB_BOVIN	197	207
QRDMPIQAFLLYQEPVLGPVRGPFPIIV	0	0	0	0	0	1	sp|P02666|CASB_BOVIN	197	224
QRDMPIQAFLLYQEPVLGPVRGPFPIIV	0	0	0	0	1	0	sp|P02666|CASB_BOVIN	197	224
QSEEQQQTEDELQDKIHPF	0	0	0	0	0	0	sp|P02666|CASB_BOVIN	49	67
QSEEQQQTEDELQDKIHPF	0	1	0	0	0	0	sp|P02666|CASB_BOVIN	49	67
QSEEQQQTEDELQDKIHPF	0	0	0	0	1	0	sp|P02666|CASB_BOVIN	49	67
QSEEQQQTEDELQDKIHPF	0	1	0	0	1	0	sp|P02666|CASB_BOVIN	49	67
QSEEQQQTEDELQDKIHPFAQTQ	0	0	0	0	1	0	sp|P02666|CASB_BOVIN	49	71
QSEEQQQTEDELQDKIHPFAQTQSL	0	0	0	0	0	1	sp|P02666|CASB_BOVIN	49	73
QSKVLPVPQK	0	0	0	0	0	0	sp|P02666|CASB_BOVIN	182	191
QSKVLPVPQK	0	0	0	0	1	0	sp|P02666|CASB_BOVIN	182	191
QSKVLPVPQK	0	0	0	0	0	1	sp|P02666|CASB_BOVIN	182	191
QSKVLPVPQKAVPYPQ	0	0	0	0	0	0	sp|P02666|CASB_BOVIN	182	197
QSKVLPVPQKAVPYPQ	0	0	0	0	1	0	sp|P02666|CASB_BOVIN	182	197
QSKVLPVPQKAVPYPQRDMPIQ	0	0	0	0	1	1	sp|P02666|CASB_BOVIN	182	203
QSKVLPVPQKAVPYPQRDMPIQ	0	0	0	0	0	0	sp|P02666|CASB_BOVIN	182	203
QSKVLPVPQKAVPYPQRDMPIQA	0	0	0	0	0	0	sp|P02666|CASB_BOVIN	182	204
QSKVLPVPQKAVPYPQRDMPIQA	0	0	0	0	1	0	sp|P02666|CASB_BOVIN	182	204
QSKVLPVPQKAVPYPQRDMPIQA	0	0	1	0	1	0	sp|P02666|CASB_BOVIN	182	204
QSKVLPVPQKAVPYPQRDMPIQAF	0	0	0	0	0	0	sp|P02666|CASB_BOVIN	182	205
QSKVLPVPQKAVPYPQRDMPIQAF	0	0	0	0	1	0	sp|P02666|CASB_BOVIN	182	205
QSKVLPVPQKAVPYPQRDMPIQAFL	0	0	0	0	1	0	sp|P02666|CASB_BOVIN	182	206
QSKVLPVPQKAVPYPQRDMPIQAFLL	0	0	0	0	0	1	sp|P02666|CASB_BOVIN	182	207
QSKVLPVPQKAVPYPQRDMPIQAFLL	0	0	0	0	1	0	sp|P02666|CASB_BOVIN	182	207
QSKVLPVPQKAVPYPQRDMPIQAFLLYQEPVL	0	0	0	0	0	1	sp|P02666|CASB_BOVIN	182	213
QSKVLPVPQKAVPYPQRDMPIQAFLLYQEPVL	0	0	0	0	1	1	sp|P02666|CASB_BOVIN	182	213
QSKVLPVPQKAVPYPQRDMPIQAFLLYQEPVLGPVRGPFPIIV	0	0	0	0	0	1	sp|P02666|CASB_BOVIN	182	224
QSKVLPVPQKAVPYPQRDMPIQAFLLYQEPVLGPVRGPFPIIV	0	0	0	0	1	1	sp|P02666|CASB_BOVIN	182	224
QSLTLTDVENLHLPLPL	0	0	0	0	1	0	sp|P02666|CASB_BOVIN	138	154
QSLTLTDVENLHLPLPLLQSWMHQPHQPLPPTVMFPPQ	0	0	0	0	1	1	sp|P02666|CASB_BOVIN	138	175
QSLTLTDVENLHLPLPLLQSWMHQPHQPLPPTVMFPPQSVL	0	0	0	0	1	1	sp|P02666|CASB_BOVIN	138	178
QSLVYPFPGPIPN	0	0	0	0	0	0	sp|P02666|CASB_BOVIN	71	83
QSLVYPFPGPIPN	0	0	0	0	0	1	sp|P02666|CASB_BOVIN	71	83
QSLVYPFPGPIPNSLPQ	0	0	0	0	0	0	sp|P02666|CASB_BOVIN	71	87
QSLVYPFPGPIPNSLPQNIPPL	0	0	0	0	0	0	sp|P02666|CASB_BOVIN	71	92
QSLVYPFPGPIPNSLPQNIPPLTQTPVVVPPF	0	0	0	0	1	0	sp|P02666|CASB_BOVIN	71	102
QSLVYPFPGPIPNSLPQNIPPLTQTPVVVPPFLQPEVM	0	0	0	0	0	0	sp|P02666|CASB_BOVIN	71	108
QSLVYPFPGPIPNSLPQNIPPLTQTPVVVPPFLQPEVMG	0	0	0	0	0	1	sp|P02666|CASB_BOVIN	71	109
QSLVYPFPGPIPNSLPQNIPPLTQTPVVVPPFLQPEVMGV	0	0	0	0	0	0	sp|P02666|CASB_BOVIN	71	110
QSLVYPFPGPIPNSLPQNIPPLTQTPVVVPPFLQPEVMGVS	0	0	0	0	0	1	sp|P02666|CASB_BOVIN	71	111
QSLVYPFPGPIPNSLPQNIPPLTQTPVVVPPFLQPEVMGVSK	0	0	0	0	1	2	sp|P02666|CASB_BOVIN	71	112
QSWMHQPH	0	0	0	0	0	0	sp|P02666|CASB_BOVIN	156	163
QSWMHQPHQPLPPT	0	0	0	0	0	0	sp|P02666|CASB_BOVIN	156	169
QSWMHQPHQPLPPT	0	0	0	0	1	0	sp|P02666|CASB_BOVIN	156	169
QSWMHQPHQPLPPTVMFPPQ	0	0	0	0	0	0	sp|P02666|CASB_BOVIN	156	175
QSWMHQPHQPLPPTVMFPPQ	0	0	0	0	1	0	sp|P02666|CASB_BOVIN	156	175
QSWMHQPHQPLPPTVMFPPQ	0	0	0	0	1	1	sp|P02666|CASB_BOVIN	156	175
QSWMHQPHQPLPPTVMFPPQ	0	0	0	0	0	1	sp|P02666|CASB_BOVIN	156	175
QSWMHQPHQPLPPTVMFPPQSV	0	0	1	0	1	0	sp|P02666|CASB_BOVIN	156	177
QSWMHQPHQPLPPTVMFPPQSVL	0	0	0	0	0	0	sp|P02666|CASB_BOVIN	156	178
QSWMHQPHQPLPPTVMFPPQSVL	0	0	1	0	1	0	sp|P02666|CASB_BOVIN	156	178
QSWMHQPHQPLPPTVMFPPQSVL	0	0	0	0	1	0	sp|P02666|CASB_BOVIN	156	178
QSWMHQPHQPLPPTVMFPPQSVLSL	0	0	0	0	0	0	sp|P02666|CASB_BOVIN	156	180
QSWMHQPHQPLPPTVMFPPQSVLSL	0	0	0	0	1	0	sp|P02666|CASB_BOVIN	156	180
QTEDELQDK	0	0	0	0	0	0	sp|P02666|CASB_BOVIN	55	63
QTEDELQDK	0	0	0	0	0	1	sp|P02666|CASB_BOVIN	55	63
QTEDELQDK	0	0	0	0	1	0	sp|P02666|CASB_BOVIN	55	63
QTEDELQDK	0	0	0	0	1	1	sp|P02666|CASB_BOVIN	55	63
QTEDELQDKIHP	0	0	0	0	1	0	sp|P02666|CASB_BOVIN	55	66
QTEDELQDKIHPF	0	0	0	0	0	0	sp|P02666|CASB_BOVIN	55	67
QTEDELQDKIHPF	0	0	0	0	1	0	sp|P02666|CASB_BOVIN	55	67
QTEDELQDKIHPF	0	0	0	0	0	1	sp|P02666|CASB_BOVIN	55	67
QTEDELQDKIHPFAQTQ	0	0	0	0	0	0	sp|P02666|CASB_BOVIN	55	71
QTEDELQDKIHPFAQTQ	0	0	0	0	1	0	sp|P02666|CASB_BOVIN	55	71
QTEDELQDKIHPFAQTQSLVYPFPGPIPN	0	0	0	0	0	1	sp|P02666|CASB_BOVIN	55	83
QTEDELQDKIHPFAQTQSLVYPFPGPIPNSLPQ	0	0	0	0	0	1	sp|P02666|CASB_BOVIN	55	87
QTPVVVPPFLQPE	0	0	0	0	0	0	sp|P02666|CASB_BOVIN	94	106
QTPVVVPPFLQPEVM	0	0	0	0	0	0	sp|P02666|CASB_BOVIN	94	108
QTPVVVPPFLQPEVM	0	0	0	0	1	0	sp|P02666|CASB_BOVIN	94	108
QTPVVVPPFLQPEVMG	0	0	0	0	0	0	sp|P02666|CASB_BOVIN	94	109
QTPVVVPPFLQPEVMGV	0	0	0	0	1	0	sp|P02666|CASB_BOVIN	94	110
QTQSLVYPFPGPIPN	0	0	0	0	0	0	sp|P02666|CASB_BOVIN	69	83
QVLSNTVPAK	0	0	0	0	0	0	sp|P02668|CASK_BOVIN	98	107
QVLSNTVPAKS	0	0	0	0	0	0	sp|P02668|CASK_BOVIN	98	108
QWQVLSNTVPAKS	0	0	0	0	1	0	sp|P02668|CASK_BOVIN	96	108
QYLKTVYQHQ	0	0	0	0	1	0	sp|P02663|CASA2_BOVIN	193	202
QYLYQGPIVLNPWDQVK	0	0	0	0	0	0	sp|P02663|CASA2_BOVIN	112	128
QYLYQGPIVLNPWDQVK	0	0	0	0	1	0	sp|P02663|CASA2_BOVIN	112	128
QYLYQGPIVLNPWDQVKR	0	0	0	0	0	0	sp|P02663|CASA2_BOVIN	112	129
QYLYQGPIVLNPWDQVKR	0	0	0	0	1	0	sp|P02663|CASA2_BOVIN	112	129
QYLYQGPIVLNPWDQVKR	0	0	0	0	0	1	sp|P02663|CASA2_BOVIN	112	129
QYLYQGPIVLNPWDQVKRN	0	0	0	0	0	0	sp|P02663|CASA2_BOVIN	112	130
QYLYQGPIVLNPWDQVKRN	0	0	0	0	1	0	sp|P02663|CASA2_BOVIN	112	130
QYLYQGPIVLNPWDQVKRN	0	0	0	0	0	1	sp|P02663|CASA2_BOVIN	112	130
QYTDAPSFSDIPNPIGSENSEKTTMPLW	0	0	0	0	0	0	sp|P02662|CASA1_BOVIN	187	214
QYTDAPSFSDIPNPIGSENSEKTTMPLW	0	0	0	0	0	1	sp|P02662|CASA1_BOVIN	187	214
QYTDAPSFSDIPNPIGSENSEKTTMPLW	0	0	0	0	1	0	sp|P02662|CASA1_BOVIN	187	214
RDMPIQA	0	0	0	0	0	0	sp|P02666|CASB_BOVIN	198	204
RDMPIQAF	0	0	0	0	0	0	sp|P02666|CASB_BOVIN	198	205
RDMPIQAFL	0	0	0	0	0	0	sp|P02666|CASB_BOVIN	198	206
RDMPIQAFL	0	0	0	0	0	1	sp|P02666|CASB_BOVIN	198	206
RDMPIQAFLL	0	0	0	0	0	0	sp|P02666|CASB_BOVIN	198	207
RDMPIQAFLLYQEPVL	0	0	0	0	0	0	sp|P02666|CASB_BOVIN	198	213
RDMPIQAFLLYQEPVLGPVRGPFPIIV	0	0	0	0	0	0	sp|P02666|CASB_BOVIN	198	224
REDLISKEQIVIR	0	1	0	0	0	0	sp|P80195|GLCM1_BOVIN	59	71
RELEELNVPGEIVE	0	0	0	0	0	0	sp|P02666|CASB_BOVIN	16	29
RELEELNVPGEIVESL	0	1	0	0	0	0	sp|P02666|CASB_BOVIN	16	31
RELEELNVPGEIVESL	0	0	0	0	0	0	sp|P02666|CASB_BOVIN	16	31
RELEELNVPGEIVESLSSSEE	0	1	0	0	0	0	sp|P02666|CASB_BOVIN	16	36
RELEELNVPGEIVESLSSSEESITRIN	0	3	0	0	0	0	sp|P02666|CASB_BOVIN	16	42
RELEELNVPGEIVESLSSSEESITRINK	0	3	0	0	0	0	sp|P02666|CASB_BOVIN	16	43
REQLSTSEENSK	0	2	0	0	0	0	sp|P02663|CASA2_BOVIN	140	151
REQLSTSEENSK	0	1	0	0	0	0	sp|P02663|CASA2_BOVIN	140	151
REQLSTSEENSKKTVD	0	1	0	0	0	0	sp|P02663|CASA2_BOVIN	140	155
REQLSTSEENSKKTVD	0	2	0	0	0	0	sp|P02663|CASA2_BOVIN	140	155
REQLSTSEENSKKTVDMESTEVFTKK	0	3	0	0	0	0	sp|P02663|CASA2_BOVIN	140	165
REQLSTSEENSKKTVDMESTEVFTKKTK	0	3	0	0	0	0	sp|P02663|CASA2_BOVIN	140	167
RFFVAPFPEVFGKEKVNELSKDIGSESTEDQAMEDIK	0	2	0	0	0	0	sp|P02662|CASA1_BOVIN	37	73
RINKKIEKFQSEEQQ	0	1	0	0	0	0	sp|P02666|CASB_BOVIN	40	54
RINKKIEKFQSEEQQQ	0	1	0	0	0	0	sp|P02666|CASB_BOVIN	40	55
RINKKIEKFQSEEQQQTE	0	1	0	0	0	0	sp|P02666|CASB_BOVIN	40	57
RINKKIEKFQSEEQQQTED	0	1	0	0	0	0	sp|P02666|CASB_BOVIN	40	58
RINKKIEKFQSEEQQQTEDELQDK	0	1	0	0	0	0	sp|P02666|CASB_BOVIN	40	63
RINKKIEKFQSEEQQQTEDELQDKIHPF	0	1	0	0	0	0	sp|P02666|CASB_BOVIN	40	67
RLKKYKVPQ	0	0	0	0	0	0	sp|P02662|CASA1_BOVIN	115	123
RLKKYKVPQL	0	0	0	0	0	0	sp|P02662|CASA1_BOVIN	115	124
RLKKYKVPQLE	0	0	0	0	0	0	sp|P02662|CASA1_BOVIN	115	125
RLKKYKVPQLEIVPN	0	0	0	0	0	0	sp|P02662|CASA1_BOVIN	115	129
RLKKYKVPQLEIVPNSAE	0	1	0	0	0	0	sp|P02662|CASA1_BOVIN	115	132
RLKKYKVPQLEIVPNSAEER	0	1	0	0	0	0	sp|P02662|CASA1_BOVIN	115	134
RLKKYKVPQLEIVPNSAEERL	0	1	0	0	0	0	sp|P02662|CASA1_BOVIN	115	135
RLKKYKVPQLEIVPNSAEERLH	0	1	0	0	0	0	sp|P02662|CASA1_BOVIN	115	136
RLKKYKVPQLEIVPNSAEERLHS	0	1	0	0	0	0	sp|P02662|CASA1_BOVIN	115	137
RLKKYKVPQLEIVPNSAEERLHSM	0	1	0	0	0	0	sp|P02662|CASA1_BOVIN	115	138
RLKKYKVPQLEIVPNSAEERLHSMK	0	1	0	0	0	0	sp|P02662|CASA1_BOVIN	115	139
RLKKYKVPQLEIVPNSAEERLHSMKEGIH	0	1	0	0	0	0	sp|P02662|CASA1_BOVIN	115	143
RLKKYKVPQLEIVPNSAEERLHSMKEGIHAQ	0	1	0	0	0	0	sp|P02662|CASA1_BOVIN	115	145
RLNFLKKI	0	0	0	0	0	0	sp|P02663|CASA2_BOVIN	175	182
RLNFLKKIS	0	0	0	0	0	0	sp|P02663|CASA2_BOVIN	175	183
RLNFLKKISQ	0	0	0	0	0	0	sp|P02663|CASA2_BOVIN	175	184
RNAVPITPTLNREQLSTSEENSK	0	1	0	0	0	0	sp|P02663|CASA2_BOVIN	129	151
RNAVPITPTLNREQLSTSEENSK	0	2	0	0	0	0	sp|P02663|CASA2_BOVIN	129	151
RNAVPITPTLNREQLSTSEENSKK	0	2	0	0	0	0	sp|P02663|CASA2_BOVIN	129	152
RNAVPITPTLNREQLSTSEENSKKT	0	2	0	0	0	0	sp|P02663|CASA2_BOVIN	129	153
RNAVPITPTLNREQLSTSEENSKKTV	0	2	0	0	0	0	sp|P02663|CASA2_BOVIN	129	154
RNAVPITPTLNREQLSTSEENSKKTVD	0	2	0	0	0	0	sp|P02663|CASA2_BOVIN	129	155
RNAVPITPTLNREQLSTSEENSKKTVDMESTEVFTKK	0	3	0	0	0	0	sp|P02663|CASA2_BOVIN	129	165
RPKHPIKHQ	0	0	0	0	0	0	sp|P02662|CASA1_BOVIN	16	24
RPKHPIKHQGLPQ	0	0	0	0	0	0	sp|P02662|CASA1_BOVIN	16	28
RPKHPIKHQGLPQ	0	0	0	0	0	1	sp|P02662|CASA1_BOVIN	16	28
RPKHPIKHQGLPQE	0	0	0	0	0	0	sp|P02662|CASA1_BOVIN	16	29
RPKHPIKHQGLPQE	0	0	0	0	0	1	sp|P02662|CASA1_BOVIN	16	29
RPKHPIKHQGLPQEV	0	0	0	0	0	0	sp|P02662|CASA1_BOVIN	16	30
RPKHPIKHQGLPQEVL	0	0	0	0	0	0	sp|P02662|CASA1_BOVIN	16	31
RPKHPIKHQGLPQEVLN	0	0	0	0	0	0	sp|P02662|CASA1_BOVIN	16	32
RPKHPIKHQGLPQEVLN	0	0	0	0	0	1	sp|P02662|CASA1_BOVIN	16	32
RPKHPIKHQGLPQEVLNE	0	0	0	0	0	0	sp|P02662|CASA1_BOVIN	16	33
RPKHPIKHQGLPQEVLNENL	0	0	0	0	0	1	sp|P02662|CASA1_BOVIN	16	35
RPKHPIKHQGLPQEVLNENL	0	0	0	0	0	0	sp|P02662|CASA1_BOVIN	16	35
RPKHPIKHQGLPQEVLNENLL	0	0	0	0	0	0	sp|P02662|CASA1_BOVIN	16	36
RPKHPIKHQGLPQEVLNENLL	0	0	0	0	0	1	sp|P02662|CASA1_BOVIN	16	36
RPKHPIKHQGLPQEVLNENLLR	0	0	0	0	0	0	sp|P02662|CASA1_BOVIN	16	37
RPKHPIKHQGLPQEVLNENLLRF	0	0	0	0	0	1	sp|P02662|CASA1_BOVIN	16	38
RPKHPIKHQGLPQEVLNENLLRF	0	0	0	0	0	0	sp|P02662|CASA1_BOVIN	16	38
RPKHPIKHQGLPQEVLNENLLRFF	0	0	0	0	0	0	sp|P02662|CASA1_BOVIN	16	39
RPKHPIKHQGLPQEVLNENLLRFF	0	0	0	0	0	1	sp|P02662|CASA1_BOVIN	16	39
RQDMVAALLECGADVNVQDADGATALMCAS	0	0	1	0	0	0	tr|E1BNU3|E1BNU3_BOVIN	697	726
RQFYQLDAYPS	0	0	0	0	0	0	sp|P02662|CASA1_BOVIN	166	176
RVYVEELKPTPEGDLEIL	0	0	0	0	0	0	sp|P02754|LACB_BOVIN	56	73
RVYVEELKPTPEGDLEILLQ	0	0	0	0	0	0	sp|P02754|LACB_BOVIN	56	75
SAEERLH	0	1	0	0	0	0	sp|P02662|CASA1_BOVIN	130	136
SAEERLHSM	0	0	0	0	0	0	sp|P02662|CASA1_BOVIN	130	138
SAEERLHSM	0	1	0	0	0	0	sp|P02662|CASA1_BOVIN	130	138
SAEERLHSMK	0	0	0	0	0	0	sp|P02662|CASA1_BOVIN	130	139
SAEERLHSMK	0	1	0	0	0	0	sp|P02662|CASA1_BOVIN	130	139
SAEERLHSMKE	0	1	0	0	0	0	sp|P02662|CASA1_BOVIN	130	140
SAEERLHSMKEGIH	0	0	0	0	0	0	sp|P02662|CASA1_BOVIN	130	143
SAEERLHSMKEGIH	0	1	0	0	0	0	sp|P02662|CASA1_BOVIN	130	143
SAEERLHSMKEGIHA	0	1	0	0	0	0	sp|P02662|CASA1_BOVIN	130	144
SAEERLHSMKEGIHAQ	0	0	0	0	0	0	sp|P02662|CASA1_BOVIN	130	145
SAEERLHSMKEGIHAQ	0	1	0	0	0	0	sp|P02662|CASA1_BOVIN	130	145
SDIPNPIGSE	0	0	0	0	0	0	sp|P02662|CASA1_BOVIN	195	204
SDIPNPIGSENS	0	0	0	0	0	0	sp|P02662|CASA1_BOVIN	195	206
SDIPNPIGSENSEK	0	0	0	0	0	0	sp|P02662|CASA1_BOVIN	195	208
SDIPNPIGSENSEKT	0	0	0	0	0	0	sp|P02662|CASA1_BOVIN	195	209
SDIPNPIGSENSEKT	0	0	0	0	0	1	sp|P02662|CASA1_BOVIN	195	209
SDIPNPIGSENSEKTTMPLW	0	0	0	0	0	0	sp|P02662|CASA1_BOVIN	195	214
SDIPNPIGSENSEKTTMPLW	0	0	0	0	0	1	sp|P02662|CASA1_BOVIN	195	214
SDKIAKYIPIQ	0	0	0	0	0	0	sp|P02668|CASK_BOVIN	40	50
SDKIAKYIPIQY	0	0	0	0	0	0	sp|P02668|CASK_BOVIN	40	51
SEEIVPNSVEQK	0	2	0	0	0	0	sp|P02662|CASA1_BOVIN	83	94
SEEIVPNSVEQKHIQ	0	2	0	0	0	0	sp|P02662|CASA1_BOVIN	83	97
SEEQQQTEDELQDK	0	1	0	0	0	0	sp|P02666|CASB_BOVIN	50	63
SEEQQQTEDELQDKIHPF	0	0	0	0	0	0	sp|P02666|CASB_BOVIN	50	67
SEEQQQTEDELQDKIHPF	0	1	0	0	0	0	sp|P02666|CASB_BOVIN	50	67
SEEQQQTEDELQDKIHPFAQTQ	0	0	0	0	0	0	sp|P02666|CASB_BOVIN	50	71
SEESITRIN	0	1	0	0	0	0	sp|P02666|CASB_BOVIN	34	42
SEESITRINK	0	1	0	0	0	0	sp|P02666|CASB_BOVIN	34	43
SEESITRINKK	0	1	0	0	0	0	sp|P02666|CASB_BOVIN	34	44
SEESITRINKKIEKFQSEEQQQTEDELQDKIHPFAQTQ	0	0	0	0	0	2	sp|P02666|CASB_BOVIN	34	71
SEKIHPF	0	0	0	0	0	0	tr|G8JKZ3|G8JKZ3_BOVIN	205	211
SENSEKTTMPLW	0	0	0	0	0	0	sp|P02662|CASA1_BOVIN	203	214
SESTEDQAMEDIK	0	2	0	0	0	0	sp|P02662|CASA1_BOVIN	61	73
SIISQETYK	0	1	0	0	0	0	sp|P02663|CASA2_BOVIN	28	36
SILKEKHLR	0	0	0	0	0	0	sp|P80195|GLCM1_BOVIN	86	94
SKDIGSESTEDQAM	0	1	0	0	0	0	sp|P02662|CASA1_BOVIN	56	69
SKDIGSESTEDQAM	0	2	0	0	0	0	sp|P02662|CASA1_BOVIN	56	69
SKDIGSESTEDQAMEDIK	0	1	0	0	0	0	sp|P02662|CASA1_BOVIN	56	73
SKDIGSESTEDQAMEDIK	0	2	0	0	0	0	sp|P02662|CASA1_BOVIN	56	73
SKDIGSESTEDQAMEDIKQ	0	2	0	0	0	0	sp|P02662|CASA1_BOVIN	56	74
SKDIGSESTEDQAMEDIKQM	0	2	0	0	0	0	sp|P02662|CASA1_BOVIN	56	75
SKDIGSESTEDQAMEDIKQM	0	1	0	0	0	0	sp|P02662|CASA1_BOVIN	56	75
SKEQIVIR	0	0	0	0	0	0	sp|P80195|GLCM1_BOVIN	64	71
SKEQIVIR	0	1	0	0	0	0	sp|P80195|GLCM1_BOVIN	64	71
SKEQIVIRS	0	0	0	0	0	0	sp|P80195|GLCM1_BOVIN	64	72
SKEQIVIRS	0	1	0	0	0	0	sp|P80195|GLCM1_BOVIN	64	72
SKKTVDMESTE	0	1	0	0	0	0	sp|P02663|CASA2_BOVIN	150	160
SKKTVDMESTEVFTK	0	1	0	0	0	0	sp|P02663|CASA2_BOVIN	150	164
SKKTVDMESTEVFTKK	0	1	0	0	0	0	sp|P02663|CASA2_BOVIN	150	165
SKKTVDMESTEVFTKKTKLTEEEKNRLN	0	1	0	0	0	0	sp|P02663|CASA2_BOVIN	150	177
SKVKEAMAPK	0	0	0	0	0	0	sp|P02666|CASB_BOVIN	111	120
SKVKEAMAPKHK	0	0	0	0	0	0	sp|P02666|CASB_BOVIN	111	122
SKVKEAMAPKHKEMPFPK	0	0	0	0	0	0	sp|P02666|CASB_BOVIN	111	128
SKVKEAMAPKHKEMPFPK	0	0	1	0	0	0	sp|P02666|CASB_BOVIN	111	128
SKVKEAMAPKHKEMPFPKYPVEPF	0	0	0	0	0	0	sp|P02666|CASB_BOVIN	111	134
SKVKEAMAPKHKEMPFPKYPVEPFTESQ	0	0	0	0	0	1	sp|P02666|CASB_BOVIN	111	138
SKVKEAMAPKHKEMPFPKYPVEPFTESQ	0	0	0	0	0	0	sp|P02666|CASB_BOVIN	111	138
SKVKEAMAPKHKEMPFPKYPVEPFTESQ	0	0	1	0	0	0	sp|P02666|CASB_BOVIN	111	138
SKVLPVPQK	0	0	0	0	0	0	sp|P02666|CASB_BOVIN	183	191
SKVLPVPQKAVP	0	0	0	0	0	0	sp|P02666|CASB_BOVIN	183	194
SKVLPVPQKAVPY	0	0	0	0	0	0	sp|P02666|CASB_BOVIN	183	195
SKVLPVPQKAVPYPQ	0	0	0	0	0	0	sp|P02666|CASB_BOVIN	183	197
SKVLPVPQKAVPYPQ	0	0	0	0	0	1	sp|P02666|CASB_BOVIN	183	197
SKVLPVPQKAVPYPQR	0	0	0	0	0	0	sp|P02666|CASB_BOVIN	183	198
[truncated: 732 more rows]

## Sheet: Table S3 Taleggio rind
Table S3. Peptide sequences identified on the rind of Taleggio cheese.
Peptide sequence	Acetylations	Phosphorylations	Oxidations	Dehydrations	Ammonia loss	Deamidation	Protein	Start position	End position
AAAAAAAAAAAAAAAAAAAA	0	0	0	0	0	0	tr|E1BME7|E1BME7_BOVIN	242	261
AAAAAAAAAAAAAAAAAAAAGGLAAAGGPG	0	0	0	0	0	0	tr|E1BME7|E1BME7_BOVIN	242	271
AAAAAAAAAAAAAAAAAAAGGLAAAG	0	0	0	0	0	0	tr|E1BME7|E1BME7_BOVIN	243	268
AAAAAAAAAAAAAAAAAAATTGPQGLHLLFERPRPPPFLGP	0	1	0	0	0	0	tr|A4FV80|A4FV80_BOVIN	224	264
AAAAAAAAAAAAAAAAAAATTGPQGLHLLFERPRPPPFLGPSPP	0	1	0	0	0	0	tr|A4FV80|A4FV80_BOVIN	224	267
AAAAAAAAAAAAAAAAAAGGLAAAGGPG	0	0	0	0	0	0	tr|E1BME7|E1BME7_BOVIN	244	271
AAAAAAAAAAAAAAAAAATTGPQGLHLLFERPR	0	0	0	0	0	1	tr|A4FV80|A4FV80_BOVIN	225	257
AAAAAAAAAAAAAAAAALGHPQHHAPVCTA	0	0	0	0	0	0	tr|G3N3S1|G3N3S1_BOVIN	147	176
AAAAAAAAAAAAAAAAATTGPQGLHLLFERPRPPPFLGP	0	1	0	0	0	0	tr|A4FV80|A4FV80_BOVIN	226	264
AAAAAAAAAAAAAAAALGHPQHHAPVCT	0	0	0	0	0	0	tr|G3N3S1|G3N3S1_BOVIN	148	175
AAAAAAAAAAAAAAAATTGPQGLHLLFERPR	0	0	0	0	0	1	tr|A4FV80|A4FV80_BOVIN	227	257
AAAAAAAAAAAAAAAGGLAAAG	0	0	0	0	0	0	tr|E1BME7|E1BME7_BOVIN	247	268
AAAAAAAAAAAAAAAIFPGGVPAA	0	0	0	0	0	0	tr|F1ME54|F1ME54_BOVIN	165	188
AAAAAAAAAAAAAAAQCRSPRCAAERRGFRRE	0	0	0	0	0	0	tr|G3N278|G3N278_BOVIN	9	40
AAAAAAAAAAAAAAATTGPQGLHLLFERPRPPPFLGPSPP	0	1	0	0	0	0	tr|A4FV80|A4FV80_BOVIN	228	267
AAAAAAAAAAAAAAAVPRLRPPH	0	0	0	0	0	0	tr|E1BAC1|E1BAC1_BOVIN	53	75
AAAAAAAAAAAAAAQDGALYKLPAGLAPLPFP	0	0	0	0	0	0	tr|F1N1U5|F1N1U5_BOVIN	144	175
AAAAAAAAAAAAAATTGPQGLHLLFERPR	0	0	0	0	0	1	tr|A4FV80|A4FV80_BOVIN	229	257
AAAAAAAAAAAAASSPAGLLAGLPRFSSLSPPPPPPGLYFSPS	0	1	0	0	0	0	tr|E1BNQ7|E1BNQ7_BOVIN	136	178
AAAAAAAAAAAAIFPGGVPAARPPYP	0	0	0	0	0	0	tr|F1ME54|F1ME54_BOVIN	168	193
AAAAAAAAAAAAKGALEGAAGFALSQVGDLAFPRFEIPAQ	0	0	0	0	0	0	tr|F1MXD3|F1MXD3_BOVIN	50	89
AAAAAAAAAAAAKGALEGAAGFALSQVGDLAFPRFEIPAQ	0	0	0	0	0	1	tr|F1MXD3|F1MXD3_BOVIN	50	89
AAAAAAAAAAAASSPAGLLAGLPRFSSLSPPPPPPGLY	0	0	0	0	0	0	tr|E1BNQ7|E1BNQ7_BOVIN	137	174
AAAAAAAAAAAASVGGTIPGPGPGGGQGPGEGGERRTARGG	0	0	0	0	0	1	tr|F1N2W4|F1N2W4_BOVIN	631	671
AAAAAAAAAALQYPYAL	0	0	0	0	0	0	tr|E1BIV1|E1BIV1_BOVIN	291	307
AAAAAAAAAASSPAGLLAGLPRFSSLSPPPPPPGLY	0	0	0	0	0	0	tr|E1BNQ7|E1BNQ7_BOVIN	139	174
AAKAAAKAAQFGLGGVGGLGV	0	0	0	0	0	1	sp|P04985|ELN_BOVIN	643	663
AAKAAAKAAQFGLGP	0	0	0	0	0	1	tr|F1N0H9|F1N0H9_BOVIN	485	499
AAKAAAKAAQFGLGPGVGVAP	0	0	0	0	0	0	sp|P04985-7|ELN_BOVIN	453	473
AAKAAAKAAQFGVSPA	0	1	0	0	0	0	sp|P04985-7|ELN_BOVIN	609	624
AEPRQGP	0	0	0	0	0	0	tr|E1BCW8|E1BCW8_BOVIN	501	507
AKAAAKAAKFGARGAVGIGGIP	0	0	0	0	0	0	sp|P04985-7|ELN_BOVIN	365	386
ALNEINQFYQKFPQYLQYLYQGPIVLNPWDQVKR	0	0	0	0	0	2	sp|P02663|CASA2_BOVIN	96	129
ALNEINQFYQKFPQYLQYLYQGPIVLNPWDQVKR	0	0	0	0	0	0	sp|P02663|CASA2_BOVIN	96	129
ALNEINQFYQKFPQYLQYLYQGPIVLNPWDQVKRN	0	0	0	0	0	1	sp|P02663|CASA2_BOVIN	96	130
APFPEVF	0	0	0	0	0	0	sp|P02662|CASA1_BOVIN	41	47
APFPEVFGK	0	0	0	0	0	0	sp|P02662|CASA1_BOVIN	41	49
APKHKEMPFPKYPVEPF	0	0	1	0	0	0	sp|P02666|CASB_BOVIN	118	134
APKHKEMPFPKYPVEPF	0	0	0	0	0	0	sp|P02666|CASB_BOVIN	118	134
APKHKEMPFPKYPVEPFTESQSLTLTDVENLHLPLPLLQS	0	0	0	0	0	1	sp|P02666|CASB_BOVIN	118	157
APSFSDIPNP	0	0	0	0	0	0	sp|P02662|CASA1_BOVIN	191	200
APSFSDIPNPIG	0	0	0	0	0	0	sp|P02662|CASA1_BOVIN	191	202
APSFSDIPNPIGS	0	0	0	0	0	0	sp|P02662|CASA1_BOVIN	191	203
APSFSDIPNPIGSE	0	0	0	0	0	0	sp|P02662|CASA1_BOVIN	191	204
APSFSDIPNPIGSEN	0	0	0	0	0	0	sp|P02662|CASA1_BOVIN	191	205
APSFSDIPNPIGSEN	0	0	0	0	0	1	sp|P02662|CASA1_BOVIN	191	205
APSFSDIPNPIGSENSE	0	0	0	0	0	0	sp|P02662|CASA1_BOVIN	191	207
APSFSDIPNPIGSENSE	0	0	0	0	0	1	sp|P02662|CASA1_BOVIN	191	207
APSFSDIPNPIGSENSEK	0	0	0	0	0	0	sp|P02662|CASA1_BOVIN	191	208
APSFSDIPNPIGSENSEK	0	0	0	0	0	1	sp|P02662|CASA1_BOVIN	191	208
APSFSDIPNPIGSENSEKT	0	0	0	0	0	1	sp|P02662|CASA1_BOVIN	191	209
APSFSDIPNPIGSENSEKT	0	0	0	0	0	0	sp|P02662|CASA1_BOVIN	191	209
APSFSDIPNPIGSENSEKTTMP	0	0	1	0	0	0	sp|P02662|CASA1_BOVIN	191	212
APSFSDIPNPIGSENSEKTTMP	0	0	0	0	0	0	sp|P02662|CASA1_BOVIN	191	212
APSFSDIPNPIGSENSEKTTMPL	0	0	0	0	0	1	sp|P02662|CASA1_BOVIN	191	213
AQQKEPMIGV	0	0	1	0	0	0	sp|P02662|CASA1_BOVIN	144	153
AQQKEPMIGV	0	0	0	0	0	0	sp|P02662|CASA1_BOVIN	144	153
AQQKEPMIGVN	0	0	1	0	0	0	sp|P02662|CASA1_BOVIN	144	154
AQQKEPMIGVN	0	0	0	0	0	0	sp|P02662|CASA1_BOVIN	144	154
AQQKEPMIGVN	0	0	0	0	0	1	sp|P02662|CASA1_BOVIN	144	154
AQQKEPMIGVNQ	0	0	1	0	0	0	sp|P02662|CASA1_BOVIN	144	155
AQQKEPMIGVNQ	0	0	0	0	0	0	sp|P02662|CASA1_BOVIN	144	155
AQQKEPMIGVNQE	0	0	1	0	0	0	sp|P02662|CASA1_BOVIN	144	156
AQQKEPMIGVNQE	0	0	0	0	0	0	sp|P02662|CASA1_BOVIN	144	156
AQQKEPMIGVNQEL	0	0	1	0	0	0	sp|P02662|CASA1_BOVIN	144	157
AQQKEPMIGVNQEL	0	0	0	0	0	0	sp|P02662|CASA1_BOVIN	144	157
AQQKEPMIGVNQELA	0	0	1	0	0	0	sp|P02662|CASA1_BOVIN	144	158
AQQKEPMIGVNQELA	0	0	0	0	0	0	sp|P02662|CASA1_BOVIN	144	158
ARSDLDDDIIPEEDIIS	0	0	0	0	0	0	sp|Q2UVX4|CO3_BOVIN	745	761
AVKAPGFGD	0	0	0	0	0	0	sp|P31081|CH60_BOVIN	299	307
AVPITPTLN	0	0	0	0	0	0	sp|P02663|CASA2_BOVIN	131	139
AVPITPTLNREQ	0	0	0	0	0	1	sp|P02663|CASA2_BOVIN	131	142
AVPYPQRDMP	0	0	1	0	0	0	sp|P02666|CASB_BOVIN	192	201
AVPYPQRDMPI	0	0	1	0	0	0	sp|P02666|CASB_BOVIN	192	202
AVPYPQRDMPI	0	0	0	0	0	0	sp|P02666|CASB_BOVIN	192	202
AVPYPQRDMPIQ	0	0	1	0	0	0	sp|P02666|CASB_BOVIN	192	203
AVPYPQRDMPIQ	0	0	0	0	0	0	sp|P02666|CASB_BOVIN	192	203
AVPYPQRDMPIQA	0	0	0	0	0	0	sp|P02666|CASB_BOVIN	192	204
AVPYPQRDMPIQAFLL	0	0	0	0	0	0	sp|P02666|CASB_BOVIN	192	207
AVPYPQRDMPIQAFLLYQEPVLGPVRGPFPIIV	0	0	0	0	0	1	sp|P02666|CASB_BOVIN	192	224
AWYYVPLGTQYTDAPSFSDIPNPIGSEN	0	0	0	0	0	1	sp|P02662|CASA1_BOVIN	178	205
CRKNKKRGAAQVLRP	0	0	0	0	0	0	sp|Q08DV9|T131L_BOVIN	1206	1220
DAPSFSDIPNPIGSE	0	0	0	0	0	0	sp|P02662|CASA1_BOVIN	190	204
DAPSFSDIPNPIGSEN	0	0	0	0	0	0	sp|P02662|CASA1_BOVIN	190	205
DAPSFSDIPNPIGSENSE	0	0	0	0	0	0	sp|P02662|CASA1_BOVIN	190	207
DAPSFSDIPNPIGSENSEK	0	0	0	0	0	0	sp|P02662|CASA1_BOVIN	190	208
DAPSFSDIPNPIGSENSEK	0	0	0	0	0	1	sp|P02662|CASA1_BOVIN	190	208
DAPSFSDIPNPIGSENSEKT	0	0	0	0	0	0	sp|P02662|CASA1_BOVIN	190	209
DAPSFSDIPNPIGSENSEKT	0	0	0	0	0	1	sp|P02662|CASA1_BOVIN	190	209
DAPSFSDIPNPIGSENSEKTTMP	0	0	1	0	0	0	sp|P02662|CASA1_BOVIN	190	212
DAPSFSDIPNPIGSENSEKTTMP	0	0	0	0	0	0	sp|P02662|CASA1_BOVIN	190	212
DAPSFSDIPNPIGSENSEKTTMP	0	0	0	0	0	1	sp|P02662|CASA1_BOVIN	190	212
DAPSFSDIPNPIGSENSEKTTMPL	0	0	0	0	0	0	sp|P02662|CASA1_BOVIN	190	213
DAPSFSDIPNPIGSENSEKTTMPL	0	0	0	0	0	1	sp|P02662|CASA1_BOVIN	190	213
DDLTDDIM	0	0	1	0	0	0	sp|P00711|LALBA_BOVIN	102	109
DELQDKIHPF	0	0	0	0	0	0	sp|P02666|CASB_BOVIN	58	67
DERFFSD	0	0	0	0	0	0	sp|P02668|CASK_BOVIN	35	41
DERFFSDK	0	0	0	0	0	0	sp|P02668|CASK_BOVIN	35	42
DIANGEIGFISNLP	0	0	0	0	0	0	tr|F1N0A6|F1N0A6_BOVIN	646	659
DIGSESTEDQAMEDIK	0	0	1	0	0	0	sp|P02662|CASA1_BOVIN	58	73
DIPNPIGSE	0	0	0	0	0	0	sp|P02662|CASA1_BOVIN	196	204
DIPNPIGSEN	0	0	0	0	0	0	sp|P02662|CASA1_BOVIN	196	205
DIPNPIGSEN	0	0	0	0	0	1	sp|P02662|CASA1_BOVIN	196	205
DIPNPIGSENS	0	0	0	0	0	1	sp|P02662|CASA1_BOVIN	196	206
DIPNPIGSENS	0	0	0	0	0	0	sp|P02662|CASA1_BOVIN	196	206
DIPNPIGSENSE	0	0	0	0	0	0	sp|P02662|CASA1_BOVIN	196	207
DIPNPIGSENSE	0	0	0	0	0	1	sp|P02662|CASA1_BOVIN	196	207
DIPNPIGSENSEK	0	0	0	0	0	0	sp|P02662|CASA1_BOVIN	196	208
DIPNPIGSENSEK	0	0	0	0	0	1	sp|P02662|CASA1_BOVIN	196	208
DIPNPIGSENSEKT	0	0	0	0	0	0	sp|P02662|CASA1_BOVIN	196	209
DIPNPIGSENSEKTT	0	0	0	0	0	0	sp|P02662|CASA1_BOVIN	196	210
DIPNPIGSENSEKTT	0	0	0	0	0	1	sp|P02662|CASA1_BOVIN	196	210
DIPNPIGSENSEKTTMP	0	0	1	0	0	0	sp|P02662|CASA1_BOVIN	196	212
DIPNPIGSENSEKTTMP	0	0	0	0	0	1	sp|P02662|CASA1_BOVIN	196	212
DIPNPIGSENSEKTTMPL	0	0	0	0	0	1	sp|P02662|CASA1_BOVIN	196	213
DIPNPIGSENSEKTTMPL	0	0	1	0	0	0	sp|P02662|CASA1_BOVIN	196	213
DIPNPIGSENSEKTTMPL	0	0	0	0	0	0	sp|P02662|CASA1_BOVIN	196	213
DIPNPIGSENSEKTTMPLW	0	0	0	0	0	1	sp|P02662|CASA1_BOVIN	196	214
DKEGIPPDQQ	0	0	0	0	0	0	sp|P63048|RL40_BOVIN	32	41
DKFLDDDLTDDIM	0	0	1	0	0	0	sp|P00711|LALBA_BOVIN	97	109
DKFLDDDLTDDIM	0	0	0	0	0	0	sp|P00711|LALBA_BOVIN	97	109
DMESTEVFTK	0	0	1	0	0	0	sp|P02663|CASA2_BOVIN	155	164
DMESTEVFTK	0	0	0	0	0	0	sp|P02663|CASA2_BOVIN	155	164
DPASAAAAAAAAAAVIP	0	1	0	0	0	0	tr|F6RYN2|F6RYN2_BOVIN	487	503
DQVKRNAVPITPT	0	0	0	0	0	1	sp|P02663|CASA2_BOVIN	125	137
DQVKRNAVPITPTLN	0	0	0	0	0	1	sp|P02663|CASA2_BOVIN	125	139
DVENLHLPLP	0	0	0	0	0	0	sp|P02666|CASB_BOVIN	144	153
DVENLHLPLPL	0	0	0	0	0	0	sp|P02666|CASB_BOVIN	144	154
DVENLHLPLPL	0	0	0	0	0	1	sp|P02666|CASB_BOVIN	144	154
DVENLHLPLPLL	0	0	0	0	0	0	sp|P02666|CASB_BOVIN	144	155
DVENLHLPLPLL	0	0	0	0	0	1	sp|P02666|CASB_BOVIN	144	155
DVENLHLPLPLLQ	0	0	0	0	0	0	sp|P02666|CASB_BOVIN	144	156
DVENLHLPLPLLQ	0	0	0	0	0	1	sp|P02666|CASB_BOVIN	144	156
DVENLHLPLPLLQS	0	0	0	0	0	0	sp|P02666|CASB_BOVIN	144	157
DVENLHLPLPLLQSW	0	0	0	0	0	0	sp|P02666|CASB_BOVIN	144	158
DVENLHLPLPLLQSWMHQPHQPLP	0	0	0	0	0	1	sp|P02666|CASB_BOVIN	144	167
EAAEAKAQEAAK	0	0	0	0	0	1	tr|E1BF55|E1BF55_BOVIN	406	417
EAAEGVEAAEGVEAAEGAQDLSVDLMQ	0	0	1	0	0	0	tr|G3MY94|G3MY94_BOVIN	202	228
EAEKAKAAALAAAAAETS	0	0	0	0	0	0	tr|F1ML71|F1ML71_BOVIN	188	205
EAEKAKAAALAAAAAETSQ	0	0	0	0	0	0	tr|F1ML71|F1ML71_BOVIN	188	206
EAMAPKHKEMPF	0	0	1	0	0	0	sp|P02666|CASB_BOVIN	115	126
EAMAPKHKEMPFP	0	0	2	0	0	0	sp|P02666|CASB_BOVIN	115	127
EAMAPKHKEMPFPKYPVEPF	0	0	0	0	0	0	sp|P02666|CASB_BOVIN	115	134
EDELQDKIHPF	0	0	0	0	0	0	sp|P02666|CASB_BOVIN	57	67
EDQAMEDIK	0	0	0	0	0	0	sp|P02662|CASA1_BOVIN	65	73
EDQEILMHHPPQ	0	0	0	0	0	0	tr|A7MB65|A7MB65_BOVIN	387	398
EDVPSERYL	0	0	0	0	0	0	sp|P02662|CASA1_BOVIN	99	107
EDVPSERYLG	0	0	0	0	0	0	sp|P02662|CASA1_BOVIN	99	108
EDVPSERYLGY	0	0	0	0	0	0	sp|P02662|CASA1_BOVIN	99	109
EDVPSERYLGYLE	0	0	0	0	0	0	sp|P02662|CASA1_BOVIN	99	111
EEEKNRLNF	0	0	0	0	0	0	sp|P02663|CASA2_BOVIN	170	178
EEEKNRLNFLK	0	0	0	0	0	0	sp|P02663|CASA2_BOVIN	170	180
EEIVPNSVEQK	0	0	0	0	0	1	sp|P02662|CASA1_BOVIN	84	94
EELKPTPEGDLE	0	0	0	0	0	0	sp|P02754|LACB_BOVIN	60	71
EELKPTPEGDLEI	0	0	0	0	0	0	sp|P02754|LACB_BOVIN	60	72
EELKPTPEGDLEILLQ	0	0	0	0	0	0	sp|P02754|LACB_BOVIN	60	75
EELNVPGEIVESL	0	0	0	0	0	0	sp|P02666|CASB_BOVIN	19	31
EGIHAQQKEPMIGVN	0	0	1	0	0	0	sp|P02662|CASA1_BOVIN	140	154
EGIHAQQKEPMIGVN	0	0	0	0	0	0	sp|P02662|CASA1_BOVIN	140	154
EGIHAQQKEPMIGVNQEL	0	0	1	0	0	0	sp|P02662|CASA1_BOVIN	140	157
EGIHAQQKEPMIGVNQEL	0	0	0	0	0	0	sp|P02662|CASA1_BOVIN	140	157
EGIHAQQKEPMIGVNQELAYFYPELFRQ	0	0	0	0	0	1	sp|P02662|CASA1_BOVIN	140	167
EGNPEVPVHF	0	0	0	0	0	0	tr|Q58DP6|Q58DP6_BOVIN	136	145
EGNPEVPVHFDK	0	0	0	0	0	0	tr|Q58DP6|Q58DP6_BOVIN	136	147
EHVSSSEESIISQE	0	1	0	0	0	0	sp|P02663|CASA2_BOVIN	20	33
EHVSSSEESIISQE	0	0	0	0	0	0	sp|P02663|CASA2_BOVIN	20	33
EHVSSSEESIISQETYK	0	0	0	0	0	0	sp|P02663|CASA2_BOVIN	20	36
EIKPVMALGLVPMCSYQMERMFNTTRIPGKDTDVL	0	0	2	0	0	0	sp|Q58DK1|CPT1B_BOVIN	291	325
EIVPNSAE	0	0	0	0	0	1	sp|P02662|CASA1_BOVIN	125	132
EIVPNSAEER	0	0	0	0	0	1	sp|P02662|CASA1_BOVIN	125	134
EIVPNSAEER	0	0	0	0	0	0	sp|P02662|CASA1_BOVIN	125	134
EIVPNSAEER	0	1	0	0	0	0	sp|P02662|CASA1_BOVIN	125	134
EIVPNSAEERL	0	0	0	0	0	1	sp|P02662|CASA1_BOVIN	125	135
EIVPNSAEERL	0	0	0	0	0	0	sp|P02662|CASA1_BOVIN	125	135
EIVPNSAEERLH	0	0	0	0	0	1	sp|P02662|CASA1_BOVIN	125	136
EIVPNSAEERLH	0	1	0	0	0	0	sp|P02662|CASA1_BOVIN	125	136
EIVPNSAEERLH	0	0	0	0	0	0	sp|P02662|CASA1_BOVIN	125	136
EKDERFF	0	0	0	0	0	0	sp|P02668|CASK_BOVIN	33	39
EKDERFFSD	0	0	0	0	0	0	sp|P02668|CASK_BOVIN	33	41
EKDERFFSDKI	0	0	0	0	0	0	sp|P02668|CASK_BOVIN	33	43
EKDLQEIMDSLVLEEPGAA	0	0	0	1	0	0	tr|F1MD97|F1MD97_BOVIN	195	213
EKFQSEEQQQTE	0	0	0	0	0	0	sp|P02666|CASB_BOVIN	46	57
EKFQSEEQQQTED	0	0	0	0	0	0	sp|P02666|CASB_BOVIN	46	58
ELEELNVPGEIVE	0	0	0	0	0	0	sp|P02666|CASB_BOVIN	17	29
ELEELNVPGEIVESL	0	0	0	0	0	0	sp|P02666|CASB_BOVIN	17	31
ELEELNVPGEIVESLS	0	0	0	0	0	0	sp|P02666|CASB_BOVIN	17	32
ELKDLKGY	0	0	0	0	0	0	sp|P00711|LALBA_BOVIN	30	37
ELKPTPEGDLEILLQ	0	0	0	0	0	0	sp|P02754|LACB_BOVIN	61	75
ELSKDIGSE	0	0	0	0	0	0	sp|P02662|CASA1_BOVIN	54	62
ELSKDIGSESTE	0	0	0	0	0	0	sp|P02662|CASA1_BOVIN	54	65
ELSKDIGSESTED	0	0	0	0	0	0	sp|P02662|CASA1_BOVIN	54	66
ELSKDIGSESTEDQ	0	0	0	0	0	0	sp|P02662|CASA1_BOVIN	54	67
ELSKDIGSESTEDQA	0	0	0	0	0	0	sp|P02662|CASA1_BOVIN	54	68
ELSKDIGSESTEDQAM	0	0	1	0	0	0	sp|P02662|CASA1_BOVIN	54	69
ELSKDIGSESTEDQAM	0	0	0	0	0	0	sp|P02662|CASA1_BOVIN	54	69
ELSKDIGSESTEDQAME	0	0	0	0	0	0	sp|P02662|CASA1_BOVIN	54	70
ELSKDIGSESTEDQAME	0	0	0	0	0	1	sp|P02662|CASA1_BOVIN	54	70
ELSKDIGSESTEDQAMEDIK	0	0	0	0	0	0	sp|P02662|CASA1_BOVIN	54	73
ELSKDIGSESTEDQAMEDIK	0	0	1	0	0	0	sp|P02662|CASA1_BOVIN	54	73
EMPFPK	0	0	0	0	0	0	sp|P02666|CASB_BOVIN	123	128
EMPFPKYP	0	0	1	0	0	0	sp|P02666|CASB_BOVIN	123	130
EMPFPKYPVE	0	0	1	0	0	0	sp|P02666|CASB_BOVIN	123	132
EMPFPKYPVEP	0	0	1	0	0	0	sp|P02666|CASB_BOVIN	123	133
EMPFPKYPVEP	0	0	0	0	0	0	sp|P02666|CASB_BOVIN	123	133
EMPFPKYPVEPF	0	0	0	0	0	0	sp|P02666|CASB_BOVIN	123	134
EMPFPKYPVEPF	0	0	1	0	0	0	sp|P02666|CASB_BOVIN	123	134
EMPFPKYPVEPF	0	0	0	1	0	0	sp|P02666|CASB_BOVIN	123	134
EMPFPKYPVEPF	0	0	1	1	0	0	sp|P02666|CASB_BOVIN	123	134
EMPFPKYPVEPFT	0	0	1	0	0	0	sp|P02666|CASB_BOVIN	123	135
EMPFPKYPVEPFT	0	0	0	0	0	0	sp|P02666|CASB_BOVIN	123	135
EMPFPKYPVEPFTE	0	0	1	0	0	0	sp|P02666|CASB_BOVIN	123	136
EMPFPKYPVEPFTE	0	0	0	0	0	0	sp|P02666|CASB_BOVIN	123	136
EMPFPKYPVEPFTES	0	0	1	0	0	0	sp|P02666|CASB_BOVIN	123	137
EMPFPKYPVEPFTES	0	0	0	0	0	0	sp|P02666|CASB_BOVIN	123	137
EMPFPKYPVEPFTESQ	0	0	1	0	0	0	sp|P02666|CASB_BOVIN	123	138
EMPFPKYPVEPFTESQ	0	0	0	0	0	0	sp|P02666|CASB_BOVIN	123	138
EMPFPKYPVEPFTESQSL	0	0	0	0	0	0	sp|P02666|CASB_BOVIN	123	140
EMPFPKYPVEPFTESQSLTLTDVENL	0	0	1	0	0	0	sp|P02666|CASB_BOVIN	123	148
EMPFPKYPVEPFTESQSLTLTDVENLHL	0	0	1	0	0	0	sp|P02666|CASB_BOVIN	123	150
EMPFPKYPVEPFTESQSLTLTDVENLHL	0	0	0	0	0	0	sp|P02666|CASB_BOVIN	123	150
EMPFPKYPVEPFTESQSLTLTDVENLHLP	0	0	1	0	0	0	sp|P02666|CASB_BOVIN	123	151
EMPFPKYPVEPFTESQSLTLTDVENLHLP	0	0	0	0	0	0	sp|P02666|CASB_BOVIN	123	151
EMPFPKYPVEPFTESQSLTLTDVENLHLP	0	0	0	0	0	1	sp|P02666|CASB_BOVIN	123	151
EMPFPKYPVEPFTESQSLTLTDVENLHLPLP	0	0	0	0	0	0	sp|P02666|CASB_BOVIN	123	153
EMPFPKYPVEPFTESQSLTLTDVENLHLPLPL	0	0	0	0	0	0	sp|P02666|CASB_BOVIN	123	154
EMPFPKYPVEPFTESQSLTLTDVENLHLPLPLL	0	0	1	0	0	0	sp|P02666|CASB_BOVIN	123	155
EMPFPKYPVEPFTESQSLTLTDVENLHLPLPLL	0	0	0	0	0	0	sp|P02666|CASB_BOVIN	123	155
EMPFPKYPVEPFTESQSLTLTDVENLHLPLPLL	0	0	0	0	0	1	sp|P02666|CASB_BOVIN	123	155
EMPFPKYPVEPFTESQSLTLTDVENLHLPLPLLQ	0	0	1	0	0	0	sp|P02666|CASB_BOVIN	123	156
EMPFPKYPVEPFTESQSLTLTDVENLHLPLPLLQ	0	0	0	0	0	0	sp|P02666|CASB_BOVIN	123	156
EMPFPKYPVEPFTESQSLTLTDVENLHLPLPLLQ	0	0	0	0	0	1	sp|P02666|CASB_BOVIN	123	156
EMPFPKYPVEPFTESQSLTLTDVENLHLPLPLLQS	0	0	1	0	0	0	sp|P02666|CASB_BOVIN	123	157
EMPFPKYPVEPFTESQSLTLTDVENLHLPLPLLQS	0	0	0	0	0	2	sp|P02666|CASB_BOVIN	123	157
EMPFPKYPVEPFTESQSLTLTDVENLHLPLPLLQSW	0	0	1	0	0	0	sp|P02666|CASB_BOVIN	123	158
EMPFPKYPVEPFTESQSLTLTDVENLHLPLPLLQSW	0	0	0	0	0	1	sp|P02666|CASB_BOVIN	123	158
EMPFPKYPVEPFTESQSLTLTDVENLHLPLPLLQSWM	0	0	0	0	0	2	sp|P02666|CASB_BOVIN	123	159
ENLHLPLP	0	0	0	0	0	0	sp|P02666|CASB_BOVIN	146	153
ENLHLPLPL	0	0	0	0	0	0	sp|P02666|CASB_BOVIN	146	154
ENLHLPLPLL	0	0	0	0	0	0	sp|P02666|CASB_BOVIN	146	155
ENLHLPLPLLQ	0	0	0	0	0	0	sp|P02666|CASB_BOVIN	146	156
ENLHLPLPLLQ	0	0	0	0	0	1	sp|P02666|CASB_BOVIN	146	156
EPFTESQSLTLTDVENLHLPLPL	0	0	0	0	0	1	sp|P02666|CASB_BOVIN	132	154
EPLPIKV	0	0	0	0	0	0	tr|F1MXF5|F1MXF5_BOVIN	2692	2698
EPMIGVNQ	0	0	0	0	0	0	sp|P02662|CASA1_BOVIN	148	155
EPMIGVNQ	0	0	0	0	0	1	sp|P02662|CASA1_BOVIN	148	155
EPMIGVNQE	0	0	1	0	0	0	sp|P02662|CASA1_BOVIN	148	156
EPMIGVNQE	0	0	0	0	0	0	sp|P02662|CASA1_BOVIN	148	156
EPMIGVNQEL	0	0	1	0	0	0	sp|P02662|CASA1_BOVIN	148	157
EPMIGVNQEL	0	0	0	0	0	0	sp|P02662|CASA1_BOVIN	148	157
EPMIGVNQEL	0	0	0	0	0	1	sp|P02662|CASA1_BOVIN	148	157
EPMIGVNQELA	0	0	1	0	0	0	sp|P02662|CASA1_BOVIN	148	158
EPMIGVNQELA	0	0	0	0	0	0	sp|P02662|CASA1_BOVIN	148	158
EPVLGPVR	0	0	0	0	0	0	sp|P02666|CASB_BOVIN	210	217
EPVLGPVRGP	0	0	0	0	0	0	sp|P02666|CASB_BOVIN	210	219
EPVLGPVRGPF	0	0	0	0	0	0	sp|P02666|CASB_BOVIN	210	220
EPVLGPVRGPFP	0	0	0	0	0	0	sp|P02666|CASB_BOVIN	210	221
EPVLGPVRGPFP	0	0	0	1	0	0	sp|P02666|CASB_BOVIN	210	221
EPVLGPVRGPFPI	0	0	0	0	0	0	sp|P02666|CASB_BOVIN	210	222
EPVLGPVRGPFPI	0	0	0	1	0	0	sp|P02666|CASB_BOVIN	210	222
EPVLGPVRGPFPII	0	0	0	0	0	0	sp|P02666|CASB_BOVIN	210	223
EPVLGPVRGPFPII	0	0	0	1	0	0	sp|P02666|CASB_BOVIN	210	223
EPVLGPVRGPFPIIV	0	0	0	0	0	0	sp|P02666|CASB_BOVIN	210	224
EPVLGPVRGPFPIIV	0	0	0	1	0	0	sp|P02666|CASB_BOVIN	210	224
EPVLPEVRLP	0	0	0	0	0	0	tr|E1BM58|E1BM58_BOVIN	440	449
EPVLPLEEGGVP	0	0	0	0	0	0	tr|F1MGX3|F1MGX3_BOVIN	224	235
EQLSTSEENSKKTVD	0	1	0	0	0	0	sp|P02663|CASA2_BOVIN	141	155
EREIKFLDVLELAEKFWYD	0	0	0	0	0	0	tr|F1N6H4|F1N6H4_BOVIN	5880	5898
ESQSLTLTDVENLHLPLPL	0	0	0	0	0	0	sp|P02666|CASB_BOVIN	136	154
EVLNENLLR	0	0	0	0	0	0	sp|P02662|CASA1_BOVIN	29	37
EVLNENLLRFF	0	0	0	0	0	0	sp|P02662|CASA1_BOVIN	29	39
FEPRPG	0	0	0	0	0	0	sp|Q2VWH6|FEZF2_BOVIN	46	51
FFVAPFPEVF	0	0	0	0	0	0	sp|P02662|CASA1_BOVIN	38	47
FLEILYSTDP	0	0	0	0	0	0	sp|Q0VCA5|SAMH1_BOVIN	416	425
FPKYPVE	0	0	0	0	0	0	sp|P02666|CASB_BOVIN	126	132
FPKYPVEP	0	0	0	0	0	0	sp|P02666|CASB_BOVIN	126	133
FPKYPVEPF	0	0	0	0	0	0	sp|P02666|CASB_BOVIN	126	134
FPKYPVEPFT	0	0	0	0	0	0	sp|P02666|CASB_BOVIN	126	135
FPKYPVEPFTE	0	0	0	0	0	0	sp|P02666|CASB_BOVIN	126	136
FPKYPVEPFTES	0	0	0	0	0	0	sp|P02666|CASB_BOVIN	126	137
FQSEEQQQTEDELQDKIHP	0	0	0	0	0	0	sp|P02666|CASB_BOVIN	48	66
FQSEEQQQTEDELQDKIHPF	0	1	0	0	0	0	sp|P02666|CASB_BOVIN	48	67
FQSEEQQQTEDELQDKIHPF	0	0	0	0	0	0	sp|P02666|CASB_BOVIN	48	67
FSDIPNPIGS	0	0	0	0	0	0	sp|P02662|CASA1_BOVIN	194	203
FSDIPNPIGSE	0	0	0	0	0	0	sp|P02662|CASA1_BOVIN	194	204
FSDIPNPIGSEN	0	0	0	0	0	0	sp|P02662|CASA1_BOVIN	194	205
FSDIPNPIGSEN	0	0	0	0	0	1	sp|P02662|CASA1_BOVIN	194	205
FSDIPNPIGSENS	0	0	0	0	0	0	sp|P02662|CASA1_BOVIN	194	206
FSDIPNPIGSENSE	0	0	0	0	0	0	sp|P02662|CASA1_BOVIN	194	207
FSDIPNPIGSENSE	0	0	0	0	0	1	sp|P02662|CASA1_BOVIN	194	207
FSDIPNPIGSENSEK	0	0	0	0	0	0	sp|P02662|CASA1_BOVIN	194	208
FSDIPNPIGSENSEK	0	0	0	0	0	1	sp|P02662|CASA1_BOVIN	194	208
FSDIPNPIGSENSEKT	0	0	0	0	0	0	sp|P02662|CASA1_BOVIN	194	209
FSDIPNPIGSENSEKT	0	0	0	0	0	1	sp|P02662|CASA1_BOVIN	194	209
FSDIPNPIGSENSEKTT	0	0	0	0	0	0	sp|P02662|CASA1_BOVIN	194	210
FSDIPNPIGSENSEKTT	0	0	0	0	0	1	sp|P02662|CASA1_BOVIN	194	210
FSDIPNPIGSENSEKTTM	0	0	1	0	0	0	sp|P02662|CASA1_BOVIN	194	211
FSDIPNPIGSENSEKTTMP	0	0	1	0	0	0	sp|P02662|CASA1_BOVIN	194	212
FSDIPNPIGSENSEKTTMP	0	0	0	0	0	0	sp|P02662|CASA1_BOVIN	194	212
FSDIPNPIGSENSEKTTMP	0	0	0	0	0	1	sp|P02662|CASA1_BOVIN	194	212
FSDIPNPIGSENSEKTTMPL	0	0	1	0	0	0	sp|P02662|CASA1_BOVIN	194	213
FSDIPNPIGSENSEKTTMPL	0	0	0	0	0	1	sp|P02662|CASA1_BOVIN	194	213
FSDIPNPIGSENSEKTTMPL	0	0	0	0	0	0	sp|P02662|CASA1_BOVIN	194	213
FSDIPNPIGSENSEKTTMPLW	0	0	0	0	0	0	sp|P02662|CASA1_BOVIN	194	214
FSDIPNPIGSENSEKTTMPLW	0	0	0	0	0	1	sp|P02662|CASA1_BOVIN	194	214
FSDIPNPIGSENSEKTTMPLW	0	0	1	0	0	0	sp|P02662|CASA1_BOVIN	194	214
FTESQSLTLTDVENLHLPLPLLQSW	0	0	0	0	0	1	sp|P02666|CASB_BOVIN	134	158
FVAPFPEVF	0	0	0	0	0	0	sp|P02662|CASA1_BOVIN	39	47
FVAPFPEVFG	0	0	0	0	0	0	sp|P02662|CASA1_BOVIN	39	48
FVAPFPEVFGK	0	0	0	0	0	0	sp|P02662|CASA1_BOVIN	39	49
FVAPFPEVFGKEKVNEL	0	0	0	0	0	0	sp|P02662|CASA1_BOVIN	39	55
GAGGQGLTVFGGVNSSSHT	0	0	0	0	0	0	sp|A0JNB0|FYN_BOVIN	55	73
GAIPGVPGVGGVPGVGIPAAAAAKAAAKA	0	0	0	0	0	0	tr|F1N0H9|F1N0H9_BOVIN	464	492
GAWYYVPLGTQYTDAPSFSDIPNPIGSENSEKTTMPLW	0	0	1	0	0	0	sp|P02662|CASA1_BOVIN	177	214
GAWYYVPLGTQYTDAPSFSDIPNPIGSENSEKTTMPLW	0	0	0	0	0	0	sp|P02662|CASA1_BOVIN	177	214
GAWYYVPLGTQYTDAPSFSDIPNPIGSENSEKTTMPLW	0	0	0	0	0	1	sp|P02662|CASA1_BOVIN	177	214
GDSDLQLERI	0	0	0	0	0	0	sp|Q6B856|TBB2B_BOVIN	38	47
GDTHLGGEDFDNRLV	0	0	0	0	0	0	sp|Q27975|HS71A_BOVIN	224	238
GEGPSTAMRAP	0	0	1	0	0	0	tr|F1MM81|F1MM81_BOVIN	1628	1638
GLPQEVLNENLLRFF	0	0	0	0	0	0	sp|P02662|CASA1_BOVIN	25	39
GNPEVPVH	0	0	0	0	0	0	tr|Q58DP6|Q58DP6_BOVIN	137	144
GPEPLRRPV	0	0	0	0	0	0	sp|Q2KI89|ARMC9_BOVIN	646	654
GPIVLNPWD	0	0	0	0	0	0	sp|P02663|CASA2_BOVIN	117	125
GPIVLNPWDQ	0	0	0	0	0	0	sp|P02663|CASA2_BOVIN	117	126
GPIVLNPWDQV	0	0	0	0	0	0	sp|P02663|CASA2_BOVIN	117	127
GPIVLNPWDQVKR	0	0	0	0	0	0	sp|P02663|CASA2_BOVIN	117	129
GPLPLP	0	0	0	0	0	0	tr|F1MFJ7|F1MFJ7_BOVIN	85	90
GPVRGPFP	0	0	0	0	0	0	sp|P02666|CASB_BOVIN	214	221
GPVRGPFPI	0	0	0	0	0	0	sp|P02666|CASB_BOVIN	214	222
GPVRGPFPII	0	0	0	0	0	0	sp|P02666|CASB_BOVIN	214	223
GPVRGPFPIIV	0	0	0	0	0	0	sp|P02666|CASB_BOVIN	214	224
GTQYTDAPSFS	0	0	0	0	0	0	sp|P02662|CASA1_BOVIN	185	195
GTQYTDAPSFSDIPNPIGS	0	0	0	0	0	0	sp|P02662|CASA1_BOVIN	185	203
GTQYTDAPSFSDIPNPIGSE	0	0	0	0	0	0	sp|P02662|CASA1_BOVIN	185	204
GTQYTDAPSFSDIPNPIGSEN	0	0	0	0	0	0	sp|P02662|CASA1_BOVIN	185	205
GTQYTDAPSFSDIPNPIGSEN	0	0	0	0	0	1	sp|P02662|CASA1_BOVIN	185	205
GTQYTDAPSFSDIPNPIGSENSE	0	0	0	0	0	0	sp|P02662|CASA1_BOVIN	185	207
GTQYTDAPSFSDIPNPIGSENSE	0	0	0	0	0	1	sp|P02662|CASA1_BOVIN	185	207
GTQYTDAPSFSDIPNPIGSENSEK	0	0	0	0	0	0	sp|P02662|CASA1_BOVIN	185	208
GTQYTDAPSFSDIPNPIGSENSEK	0	0	0	0	0	1	sp|P02662|CASA1_BOVIN	185	208
GTQYTDAPSFSDIPNPIGSENSEKT	0	0	0	0	0	0	sp|P02662|CASA1_BOVIN	185	209
GTQYTDAPSFSDIPNPIGSENSEKT	0	0	0	0	0	1	sp|P02662|CASA1_BOVIN	185	209
GTQYTDAPSFSDIPNPIGSENSEKTTMP	0	0	1	0	0	0	sp|P02662|CASA1_BOVIN	185	212
GTQYTDAPSFSDIPNPIGSENSEKTTMP	0	0	0	0	0	0	sp|P02662|CASA1_BOVIN	185	212
GTQYTDAPSFSDIPNPIGSENSEKTTMP	0	0	0	0	0	1	sp|P02662|CASA1_BOVIN	185	212
GTQYTDAPSFSDIPNPIGSENSEKTTMPL	0	0	1	0	0	0	sp|P02662|CASA1_BOVIN	185	213
GTQYTDAPSFSDIPNPIGSENSEKTTMPL	0	0	0	0	0	1	sp|P02662|CASA1_BOVIN	185	213
GTQYTDAPSFSDIPNPIGSENSEKTTMPL	0	0	0	0	0	0	sp|P02662|CASA1_BOVIN	185	213
GTQYTDAPSFSDIPNPIGSENSEKTTMPLW	0	0	1	0	0	0	sp|P02662|CASA1_BOVIN	185	214
GTQYTDAPSFSDIPNPIGSENSEKTTMPLW	0	0	0	0	0	0	sp|P02662|CASA1_BOVIN	185	214
GVSKVKEAMAP	0	0	1	0	0	0	sp|P02666|CASB_BOVIN	109	119
GYIPQAFP	0	0	0	0	0	0	tr|F6RYN2|F6RYN2_BOVIN	569	576
GYLEQLLRL	0	0	0	0	0	0	sp|P02662|CASA1_BOVIN	108	116
HIQKEDVPS	0	0	0	0	0	0	sp|P02662|CASA1_BOVIN	95	103
HIQKEDVPSE	0	0	0	0	0	0	sp|P02662|CASA1_BOVIN	95	104
HIQKEDVPSER	0	0	0	0	0	0	sp|P02662|CASA1_BOVIN	95	105
HIQKEDVPSERY	0	0	0	0	0	0	sp|P02662|CASA1_BOVIN	95	106
HIQKEDVPSERYL	0	0	0	0	0	0	sp|P02662|CASA1_BOVIN	95	107
HIQKEDVPSERYLGYLEQLLRL	0	0	0	0	0	0	sp|P02662|CASA1_BOVIN	95	116
HIQKEDVPSERYLGYLEQLLRLK	0	0	0	0	0	0	sp|P02662|CASA1_BOVIN	95	117
HKEMPFP	0	0	0	0	0	0	sp|P02666|CASB_BOVIN	121	127
HKEMPFPKYPVEP	0	0	1	0	0	0	sp|P02666|CASB_BOVIN	121	133
HKEMPFPKYPVEP	0	0	0	0	0	0	sp|P02666|CASB_BOVIN	121	133
HKEMPFPKYPVEPF	0	0	1	0	0	0	sp|P02666|CASB_BOVIN	121	134
HKEMPFPKYPVEPF	0	0	0	0	0	0	sp|P02666|CASB_BOVIN	121	134
HKEMPFPKYPVEPFT	0	0	1	0	0	0	sp|P02666|CASB_BOVIN	121	135
HKEMPFPKYPVEPFT	0	0	0	0	0	0	sp|P02666|CASB_BOVIN	121	135
HKEMPFPKYPVEPFTES	0	0	1	0	0	0	sp|P02666|CASB_BOVIN	121	137
HKEMPFPKYPVEPFTES	0	0	0	0	0	0	sp|P02666|CASB_BOVIN	121	137
HKEMPFPKYPVEPFTESQ	0	0	0	0	0	0	sp|P02666|CASB_BOVIN	121	138
HKEMPFPKYPVEPFTESQSLTLTDVENL	0	0	0	0	0	1	sp|P02666|CASB_BOVIN	121	148
HKEMPFPKYPVEPFTESQSLTLTDVENL	0	0	0	0	0	2	sp|P02666|CASB_BOVIN	121	148
HKEMPFPKYPVEPFTESQSLTLTDVENLHL	0	0	0	0	0	1	sp|P02666|CASB_BOVIN	121	150
HKEMPFPKYPVEPFTESQSLTLTDVENLHLPL	0	0	0	0	0	1	sp|P02666|CASB_BOVIN	121	152
HKEMPFPKYPVEPFTESQSLTLTDVENLHLPLP	0	0	1	0	0	0	sp|P02666|CASB_BOVIN	121	153
HKEMPFPKYPVEPFTESQSLTLTDVENLHLPLP	0	0	0	0	0	1	sp|P02666|CASB_BOVIN	121	153
HKEMPFPKYPVEPFTESQSLTLTDVENLHLPLPL	0	0	1	0	0	0	sp|P02666|CASB_BOVIN	121	154
HKEMPFPKYPVEPFTESQSLTLTDVENLHLPLPL	0	0	0	0	0	0	sp|P02666|CASB_BOVIN	121	154
HKEMPFPKYPVEPFTESQSLTLTDVENLHLPLPLL	0	0	0	0	0	1	sp|P02666|CASB_BOVIN	121	155
HKEMPFPKYPVEPFTESQSLTLTDVENLHLPLPLLQ	0	0	0	0	0	0	sp|P02666|CASB_BOVIN	121	156
HKEMPFPKYPVEPFTESQSLTLTDVENLHLPLPLLQS	0	0	0	0	0	2	sp|P02666|CASB_BOVIN	121	157
HKEMPFPKYPVEPFTESQSLTLTDVENLHLPLPLLQS	0	0	1	0	0	0	sp|P02666|CASB_BOVIN	121	157
HKEMPFPKYPVEPFTESQSLTLTDVENLHLPLPLLQSW	0	0	0	0	0	1	sp|P02666|CASB_BOVIN	121	158
HKEMPFPKYPVEPFTESQSLTLTDVENLHLPLPLLQSWM	0	0	0	0	0	1	sp|P02666|CASB_BOVIN	121	159
HLLPLP	0	0	0	0	0	0	tr|Q2KIW4|Q2KIW4_BOVIN	392	397
HLPLPLL	0	0	0	0	0	0	sp|P02666|CASB_BOVIN	149	155
HLPLPLLQ	0	0	0	0	0	0	sp|P02666|CASB_BOVIN	149	156
HPHPHLSF	0	0	0	0	0	0	sp|P02668|CASK_BOVIN	119	126
HQPHQPLPPT	0	0	0	0	0	0	sp|P02666|CASB_BOVIN	160	169
HQPHQPLPPT	0	0	0	0	0	1	sp|P02666|CASB_BOVIN	160	169
HQPHQPLPPTV	0	0	0	0	0	0	sp|P02666|CASB_BOVIN	160	170
HQPHQPLPPTVM	0	0	1	0	0	0	sp|P02666|CASB_BOVIN	160	171
HQPHQPLPPTVM	0	0	0	0	0	0	sp|P02666|CASB_BOVIN	160	171
HQPHQPLPPTVMFPPQ	0	0	1	0	0	0	sp|P02666|CASB_BOVIN	160	175
HQPHQPLPPTVMFPPQ	0	0	0	0	0	0	sp|P02666|CASB_BOVIN	160	175
HQPLPPT	0	0	0	0	0	0	sp|P02666|CASB_BOVIN	163	169
HQPLPPTV	0	0	0	0	0	0	sp|P02666|CASB_BOVIN	163	170
HQPLPPTVMFPPQ	0	0	1	0	0	0	sp|P02666|CASB_BOVIN	163	175
HQPLPPTVMFPPQ	0	0	0	0	0	0	sp|P02666|CASB_BOVIN	163	175
HVSSSEESIISQE	0	1	0	0	0	0	sp|P02663|CASA2_BOVIN	21	33
IAKYIPIQ	0	0	0	0	0	0	sp|P02668|CASK_BOVIN	43	50
IAKYIPIQY	0	0	0	0	0	0	sp|P02668|CASK_BOVIN	43	51
IEKFQSEEQ	0	0	0	0	0	0	sp|P02666|CASB_BOVIN	45	53
IEKFQSEEQQ	0	0	0	0	0	0	sp|P02666|CASB_BOVIN	45	54
IEKFQSEEQQQ	0	0	0	0	0	0	sp|P02666|CASB_BOVIN	45	55
IEKFQSEEQQQT	0	0	0	0	0	0	sp|P02666|CASB_BOVIN	45	56
IEKFQSEEQQQTE	0	0	0	0	0	0	sp|P02666|CASB_BOVIN	45	57
IEKFQSEEQQQTED	0	0	0	0	0	0	sp|P02666|CASB_BOVIN	45	58
IEKFQSEEQQQTEDELQ	0	0	0	0	0	1	sp|P02666|CASB_BOVIN	45	61
IEKFQSEEQQQTEDELQD	0	0	0	0	0	0	sp|P02666|CASB_BOVIN	45	62
IEKFQSEEQQQTEDELQDKIHP	0	0	0	0	0	0	sp|P02666|CASB_BOVIN	45	66
IEKFQSEEQQQTEDELQDKIHPF	0	1	0	0	0	0	sp|P02666|CASB_BOVIN	45	67
IEKFQSEEQQQTEDELQDKIHPF	0	0	0	0	0	0	sp|P02666|CASB_BOVIN	45	67
IGSENSEKTTMP	0	0	0	0	0	0	sp|P02662|CASA1_BOVIN	201	212
IGSESTEDQAMEDIK	0	0	1	0	0	0	sp|P02662|CASA1_BOVIN	59	73
IHPFAQTQSLVYPFPGPIPN	0	2	0	0	0	0	sp|P02666|CASB_BOVIN	64	83
IPNPIGSE	0	0	0	0	0	0	sp|P02662|CASA1_BOVIN	197	204
IPNPIGSEN	0	0	0	0	0	0	sp|P02662|CASA1_BOVIN	197	205
IPNPIGSEN	0	0	0	0	0	1	sp|P02662|CASA1_BOVIN	197	205
IPNPIGSENS	0	0	0	0	0	0	sp|P02662|CASA1_BOVIN	197	206
IPNPIGSENS	0	0	0	0	0	1	sp|P02662|CASA1_BOVIN	197	206
IPNPIGSENSE	0	0	0	0	0	0	sp|P02662|CASA1_BOVIN	197	207
IPNPIGSENSE	0	0	0	0	0	1	sp|P02662|CASA1_BOVIN	197	207
IPNPIGSENSEK	0	0	0	0	0	0	sp|P02662|CASA1_BOVIN	197	208
IPNPIGSENSEK	0	0	0	0	0	1	sp|P02662|CASA1_BOVIN	197	208
IPNPIGSENSEKT	0	0	0	0	0	0	sp|P02662|CASA1_BOVIN	197	209
IPNPIGSENSEKT	0	0	0	0	0	1	sp|P02662|CASA1_BOVIN	197	209
IPNPIGSENSEKTTMP	0	0	0	0	0	1	sp|P02662|CASA1_BOVIN	197	212
IPNPIGSENSEKTTMP	0	0	1	0	0	0	sp|P02662|CASA1_BOVIN	197	212
IPNPIGSENSEKTTMP	0	0	0	0	0	0	sp|P02662|CASA1_BOVIN	197	212
IPNPIGSENSEKTTMPL	0	0	0	0	0	1	sp|P02662|CASA1_BOVIN	197	213
IPNPIGSENSEKTTMPLW	0	0	0	0	0	1	sp|P02662|CASA1_BOVIN	197	214
IPPLTQTPVVVPP	0	0	0	0	0	0	sp|P02666|CASB_BOVIN	89	101
IPPLTQTPVVVPPF	0	0	0	0	0	0	sp|P02666|CASB_BOVIN	89	102
IPPLTQTPVVVPPFLQP	0	0	0	0	0	0	sp|P02666|CASB_BOVIN	89	105
IPPLTQTPVVVPPFLQPE	0	0	0	0	0	0	sp|P02666|CASB_BOVIN	89	106
IPPLTQTPVVVPPFLQPEVM	0	0	1	0	0	0	sp|P02666|CASB_BOVIN	89	108
IQKEDVPSER	0	0	0	0	0	0	sp|P02662|CASA1_BOVIN	96	105
ITVDDKHY	0	0	0	0	0	0	sp|P02663|CASA2_BOVIN	86	93
ITVDDKHYQ	0	0	0	0	0	0	sp|P02663|CASA2_BOVIN	86	94
ITVDDKHYQKAL	0	0	0	0	0	0	sp|P02663|CASA2_BOVIN	86	97
IVLNPWDQV	0	0	0	0	0	0	sp|P02663|CASA2_BOVIN	119	127
IVLNPWDQVK	0	0	0	0	0	0	sp|P02663|CASA2_BOVIN	119	128
IVPNSAEER	0	1	0	0	0	0	sp|P02662|CASA1_BOVIN	126	134
IVPNSAEERLH	0	0	0	0	0	1	sp|P02662|CASA1_BOVIN	126	136
IVPNSAEERLH	0	0	0	0	0	0	sp|P02662|CASA1_BOVIN	126	136
IVPNSAEERLH	0	1	0	0	0	0	sp|P02662|CASA1_BOVIN	126	136
KAVPYPQRDMP	0	0	1	0	0	0	sp|P02666|CASB_BOVIN	191	201
KAVPYPQRDMPI	0	0	1	0	0	0	sp|P02666|CASB_BOVIN	191	202
KAVPYPQRDMPIQ	0	0	1	0	0	0	sp|P02666|CASB_BOVIN	191	203
KAVPYPQRDMPIQ	0	0	0	0	0	0	sp|P02666|CASB_BOVIN	191	203
KAVPYPQRDMPIQA	0	0	1	0	0	0	sp|P02666|CASB_BOVIN	191	204
KAVPYPQRDMPIQA	0	0	0	0	0	0	sp|P02666|CASB_BOVIN	191	204
KAVPYPQRDMPIQAFLLYQEPVL	0	0	0	0	0	1	sp|P02666|CASB_BOVIN	191	213
KDERFFSD	0	0	0	0	0	0	sp|P02668|CASK_BOVIN	34	41
KDERFFSDKIA	0	0	0	0	0	0	sp|P02668|CASK_BOVIN	34	44
KDIGSESTEDQA	0	0	0	0	0	0	sp|P02662|CASA1_BOVIN	57	68
KDIGSESTEDQAM	0	0	0	0	0	0	sp|P02662|CASA1_BOVIN	57	69
KDIGSESTEDQAME	0	0	1	0	0	0	sp|P02662|CASA1_BOVIN	57	70
KDIGSESTEDQAME	0	0	0	0	0	0	sp|P02662|CASA1_BOVIN	57	70
KDIGSESTEDQAMED	0	0	1	0	0	0	sp|P02662|CASA1_BOVIN	57	71
KDIGSESTEDQAMEDIK	0	0	1	0	0	0	sp|P02662|CASA1_BOVIN	57	73
KDIGSESTEDQAMEDIK	0	0	0	0	0	0	sp|P02662|CASA1_BOVIN	57	73
KDVLARAAAKGLLEGIEL	0	0	0	0	0	0	tr|F1MME5|F1MME5_BOVIN	522	539
KDVLARAAAKGLLEGIELG	0	0	0	0	0	0	tr|F1MME5|F1MME5_BOVIN	522	540
KDVLARAAAKGLLEGIELGK	0	0	0	0	0	0	tr|F1MME5|F1MME5_BOVIN	522	541
KEAAEAKAQEAAK	0	0	0	0	0	1	tr|E1BF55|E1BF55_BOVIN	405	417
KEAAEAKAQEAAKQ	0	0	0	0	0	1	tr|E1BF55|E1BF55_BOVIN	405	418
KEAAEAKAQEAAKQMRL	0	0	0	0	0	1	tr|E1BF55|E1BF55_BOVIN	405	421
KEAAEAKAQEAAKQMRLK	0	0	0	0	0	1	tr|E1BF55|E1BF55_BOVIN	405	422
KEAEAKAALEEEKR	0	0	0	0	0	0	tr|F1MPV5|F1MPV5_BOVIN	843	856
KEDVPSERYL	0	0	0	0	0	0	sp|P02662|CASA1_BOVIN	98	107
KEDVPSERYLGY	0	0	0	0	0	0	sp|P02662|CASA1_BOVIN	98	109
KEGNGIGVN	0	0	0	0	0	0	tr|F1MY82|F1MY82_BOVIN	337	345
KEMPFPK	0	0	0	0	0	0	sp|P02666|CASB_BOVIN	122	128
KEMPFPKYP	0	0	0	0	0	0	sp|P02666|CASB_BOVIN	122	130
KEMPFPKYPVEP	0	0	1	0	0	0	sp|P02666|CASB_BOVIN	122	133
KEMPFPKYPVEP	0	0	0	0	0	0	sp|P02666|CASB_BOVIN	122	133
KEMPFPKYPVEPF	0	0	1	0	0	0	sp|P02666|CASB_BOVIN	122	134
KEMPFPKYPVEPF	0	0	0	0	0	0	sp|P02666|CASB_BOVIN	122	134
KEMPFPKYPVEPFTES	0	0	0	0	0	0	sp|P02666|CASB_BOVIN	122	137
KEMPFPKYPVEPFTESQSLTLTDVENLHL	0	0	1	0	0	0	sp|P02666|CASB_BOVIN	122	150
KEMPFPKYPVEPFTESQSLTLTDVENLHL	0	0	0	0	0	0	sp|P02666|CASB_BOVIN	122	150
KEMPFPKYPVEPFTESQSLTLTDVENLHLP	0	0	1	0	0	0	sp|P02666|CASB_BOVIN	122	151
KEMPFPKYPVEPFTESQSLTLTDVENLHLP	0	0	0	0	0	0	sp|P02666|CASB_BOVIN	122	151
KEMPFPKYPVEPFTESQSLTLTDVENLHLPL	0	0	1	0	0	0	sp|P02666|CASB_BOVIN	122	152
KEMPFPKYPVEPFTESQSLTLTDVENLHLPL	0	0	0	0	0	1	sp|P02666|CASB_BOVIN	122	152
KEMPFPKYPVEPFTESQSLTLTDVENLHLPLP	0	0	1	0	0	0	sp|P02666|CASB_BOVIN	122	153
KEMPFPKYPVEPFTESQSLTLTDVENLHLPLP	0	0	0	0	0	0	sp|P02666|CASB_BOVIN	122	153
KEMPFPKYPVEPFTESQSLTLTDVENLHLPLP	0	0	0	0	0	2	sp|P02666|CASB_BOVIN	122	153
KEMPFPKYPVEPFTESQSLTLTDVENLHLPLPL	0	0	0	0	0	1	sp|P02666|CASB_BOVIN	122	154
KEMPFPKYPVEPFTESQSLTLTDVENLHLPLPLLQS	0	0	0	0	0	0	sp|P02666|CASB_BOVIN	122	157
KEMPFPKYPVEPFTESQSLTLTDVENLHLPLPLLQS	0	0	0	0	0	1	sp|P02666|CASB_BOVIN	122	157
KEMPFPKYPVEPFTESQSLTLTDVENLHLPLPLLQS	0	0	1	0	0	0	sp|P02666|CASB_BOVIN	122	157
KEPMIGV	0	0	0	0	0	0	sp|P02662|CASA1_BOVIN	147	153
KEPMIGVN	0	0	1	0	0	0	sp|P02662|CASA1_BOVIN	147	154
KEPMIGVN	0	0	0	0	0	0	sp|P02662|CASA1_BOVIN	147	154
KEPMIGVN	0	0	0	0	0	1	sp|P02662|CASA1_BOVIN	147	154
KEPMIGVNQ	0	0	1	0	0	0	sp|P02662|CASA1_BOVIN	147	155
KEPMIGVNQ	0	0	0	0	0	0	sp|P02662|CASA1_BOVIN	147	155
KEPMIGVNQE	0	0	1	0	0	0	sp|P02662|CASA1_BOVIN	147	156
KEPMIGVNQE	0	0	0	0	0	0	sp|P02662|CASA1_BOVIN	147	156
KEPMIGVNQEL	0	0	0	0	0	0	sp|P02662|CASA1_BOVIN	147	157
KEPMIGVNQEL	0	0	1	0	0	0	sp|P02662|CASA1_BOVIN	147	157
KEPMIGVNQEL	0	0	0	0	0	1	sp|P02662|CASA1_BOVIN	147	157
KEPMIGVNQELA	0	0	1	0	0	0	sp|P02662|CASA1_BOVIN	147	158
KEPMIGVNQELA	0	0	0	0	0	0	sp|P02662|CASA1_BOVIN	147	158
KEPMIGVNQELA	0	0	0	0	0	1	sp|P02662|CASA1_BOVIN	147	158
KFALPQYL	0	0	0	0	0	0	sp|P02663|CASA2_BOVIN	188	195
KFLDDDLTDDIM	0	0	1	0	0	0	sp|P00711|LALBA_BOVIN	98	109
KFQSEEQQQTEDELQDKIHPF	0	1	0	0	0	0	sp|P02666|CASB_BOVIN	47	67
KFQSEEQQQTEDELQDKIHPF	0	0	0	0	0	0	sp|P02666|CASB_BOVIN	47	67
KFVEVLDERS	0	0	0	0	0	0	sp|Q2KI13|SGSM3_BOVIN	529	538
KGLDIQKVA	0	0	0	0	0	0	sp|P02754|LACB_BOVIN	24	32
KHIQKEDVPSERY	0	0	0	0	0	0	sp|P02662|CASA1_BOVIN	94	106
KHKEMPFPKYPVEPF	0	0	1	0	0	0	sp|P02666|CASB_BOVIN	120	134
KHKEMPFPKYPVEPF	0	0	0	0	0	0	sp|P02666|CASB_BOVIN	120	134
KIAKYIPIQ	0	0	0	0	0	0	sp|P02668|CASK_BOVIN	42	50
KIEKFQSEEQ	0	0	0	0	0	0	sp|P02666|CASB_BOVIN	44	53
KIEKFQSEEQQ	0	0	0	0	0	0	sp|P02666|CASB_BOVIN	44	54
KIEKFQSEEQQQT	0	1	0	0	0	0	sp|P02666|CASB_BOVIN	44	56
KIEKFQSEEQQQT	0	0	0	0	0	0	sp|P02666|CASB_BOVIN	44	56
KIEKFQSEEQQQTE	0	0	0	0	0	0	sp|P02666|CASB_BOVIN	44	57
KIEKFQSEEQQQTE	0	1	0	0	0	0	sp|P02666|CASB_BOVIN	44	57
KIEKFQSEEQQQTED	0	0	0	0	0	0	sp|P02666|CASB_BOVIN	44	58
KIEKFQSEEQQQTED	0	1	0	0	0	0	sp|P02666|CASB_BOVIN	44	58
KIEKFQSEEQQQTEDELQ	0	0	0	0	0	0	sp|P02666|CASB_BOVIN	44	61
KIEKFQSEEQQQTEDELQ	0	1	0	0	0	0	sp|P02666|CASB_BOVIN	44	61
KIEKFQSEEQQQTEDELQD	0	0	0	0	0	0	sp|P02666|CASB_BOVIN	44	62
KIEKFQSEEQQQTEDELQDKIHPF	0	1	0	0	0	0	sp|P02666|CASB_BOVIN	44	67
KIEKFQSEEQQQTEDELQDKIHPF	0	0	0	0	0	0	sp|P02666|CASB_BOVIN	44	67
KIEKFQSEEQQQTEDELQDKIHPFAQTQ	0	1	0	0	0	0	sp|P02666|CASB_BOVIN	44	71
KKAAAAAAAATLLPHE	0	0	0	0	0	0	tr|G3MYL5|G3MYL5_BOVIN	407	422
KKIEKFQSEEQQQTED	0	0	0	0	0	0	sp|P02666|CASB_BOVIN	43	58
KKIEKFQSEEQQQTED	0	1	0	0	0	0	sp|P02666|CASB_BOVIN	43	58
KKYKVPQLE	0	0	0	0	0	0	sp|P02662|CASA1_BOVIN	117	125
KKYKVPQLEIVPNSAEERLHSM	0	1	0	0	0	0	sp|P02662|CASA1_BOVIN	117	138
KLTEEEKNRL	0	0	0	0	0	0	sp|P02663|CASA2_BOVIN	167	176
KNKMEVKGRE	0	0	1	0	0	0	tr|F1MP22|F1MP22_BOVIN	1340	1349
KNTMEHVSSSEESIISQETYK	0	3	0	0	0	0	sp|P02663|CASA2_BOVIN	16	36
KPAAALSAAP	0	0	0	0	0	0	tr|Q1RMR8|Q1RMR8_BOVIN	60	69
KPTPEGDLEIL	0	0	0	0	0	0	sp|P02754|LACB_BOVIN	63	73
KPVALINN	0	0	0	0	0	0	sp|P02668|CASK_BOVIN	67	74
KTKLTEEEKNRL	0	0	0	0	0	0	sp|P02663|CASA2_BOVIN	165	176
KTKLTEEEKNRLN	0	0	0	0	0	0	sp|P02663|CASA2_BOVIN	165	177
KTKLTEEEKNRLNF	0	0	0	0	0	0	sp|P02663|CASA2_BOVIN	165	178
KTKLTEEEKNRLNFL	0	0	0	0	0	0	sp|P02663|CASA2_BOVIN	165	179
KTKLTEEEKNRLNFLK	0	0	0	0	0	0	sp|P02663|CASA2_BOVIN	165	180
KVLPVP	0	0	0	0	0	0	sp|P02666|CASB_BOVIN	184	189
KVLPVPQ	0	0	0	0	0	0	sp|P02666|CASB_BOVIN	184	190
KVLPVPQK	0	0	0	0	0	0	sp|P02666|CASB_BOVIN	184	191
KVPQLEIVPNSAE	0	0	0	0	0	1	sp|P02662|CASA1_BOVIN	120	132
KVPQLEIVPNSAEE	0	0	0	0	0	0	sp|P02662|CASA1_BOVIN	120	133
KVPQLEIVPNSAEE	0	0	0	0	0	1	sp|P02662|CASA1_BOVIN	120	133
KVPQLEIVPNSAEE	0	1	0	0	0	0	sp|P02662|CASA1_BOVIN	120	133
KVPQLEIVPNSAEER	0	1	0	0	0	0	sp|P02662|CASA1_BOVIN	120	134
KVPQLEIVPNSAEERL	0	0	0	0	0	1	sp|P02662|CASA1_BOVIN	120	135
KVPQLEIVPNSAEERL	0	1	0	0	0	0	sp|P02662|CASA1_BOVIN	120	135
KVPQLEIVPNSAEERLH	0	0	0	0	0	1	sp|P02662|CASA1_BOVIN	120	136
KVPQLEIVPNSAEERLH	0	1	0	0	0	0	sp|P02662|CASA1_BOVIN	120	136
KYIPIQYV	0	0	0	0	0	0	sp|P02668|CASK_BOVIN	45	52
KYKVPQLEIVPN	0	0	0	0	0	0	sp|P02662|CASA1_BOVIN	118	129
KYPVEPF	0	0	0	0	0	0	sp|P02666|CASB_BOVIN	128	134
KYPVEPFTES	0	0	0	0	0	0	sp|P02666|CASB_BOVIN	128	137
KYPVEPFTESQSLTLTDVENLHLPL	0	0	0	0	0	0	sp|P02666|CASB_BOVIN	128	152
KYPVEPFTESQSLTLTDVENLHLPLP	0	0	0	0	0	1	sp|P02666|CASB_BOVIN	128	153
KYPVEPFTESQSLTLTDVENLHLPLPLLQS	0	0	0	0	0	1	sp|P02666|CASB_BOVIN	128	157
LDSGGVLSLELQLNVS	0	0	0	0	0	0	sp|A6QLK4|TMM8B_BOVIN	79	94
LDTDYKKY	0	0	0	0	0	0	sp|P02754|LACB_BOVIN	111	118
LEIVPNSAEER	0	0	0	0	0	1	sp|P02662|CASA1_BOVIN	124	134
LEIVPNSAEER	0	1	0	0	0	0	sp|P02662|CASA1_BOVIN	124	134
LEIVPNSAEERLH	0	0	0	0	0	1	sp|P02662|CASA1_BOVIN	124	136
LEIVPNSAEERLH	0	1	0	0	0	0	sp|P02662|CASA1_BOVIN	124	136
LEQLLRLK	0	0	0	0	0	0	sp|P02662|CASA1_BOVIN	110	117
LFQPFLKVIEPV	0	0	0	0	0	0	sp|P32871|PK3CA_BOVIN	94	105
LGPVRGPFPI	0	0	0	0	0	0	sp|P02666|CASB_BOVIN	213	222
LGPVRGPFPII	0	0	0	0	0	0	sp|P02666|CASB_BOVIN	213	223
LGPVRGPFPIIV	0	0	0	0	0	0	sp|P02666|CASB_BOVIN	213	224
LGYLEQLLR	0	0	0	0	0	0	sp|P02662|CASA1_BOVIN	107	115
LGYLEQLLRL	0	0	0	0	0	0	sp|P02662|CASA1_BOVIN	107	116
LGYLEQLLRLK	0	0	0	0	0	0	sp|P02662|CASA1_BOVIN	107	117
LHLPLPLL	0	0	0	0	0	0	sp|P02666|CASB_BOVIN	148	155
LHLPLPLLQ	0	0	0	0	0	0	sp|P02666|CASB_BOVIN	148	156
LHLPLPLLQS	0	0	0	0	0	0	sp|P02666|CASB_BOVIN	148	157
LLYQEPVLGPV	0	0	0	0	0	0	sp|P02666|CASB_BOVIN	206	216
LLYQEPVLGPVRGPF	0	0	0	0	0	0	sp|P02666|CASB_BOVIN	206	220
LLYQEPVLGPVRGPFP	0	0	0	0	0	0	sp|P02666|CASB_BOVIN	206	221
LLYQEPVLGPVRGPFPI	0	0	0	0	0	0	sp|P02666|CASB_BOVIN	206	222
LLYQEPVLGPVRGPFPII	0	0	0	0	0	0	sp|P02666|CASB_BOVIN	206	223
LLYQEPVLGPVRGPFPIIV	0	0	0	0	0	0	sp|P02666|CASB_BOVIN	206	224
LMNSRSLELFSIDPQ	0	0	1	0	0	0	tr|F1MHH5|F1MHH5_BOVIN	366	380
LNREQLSTSEEN	0	0	0	0	0	0	sp|P02663|CASA2_BOVIN	138	149
LNREQLSTSEENS	0	0	0	0	0	0	sp|P02663|CASA2_BOVIN	138	150
LNREQLSTSEENS	0	1	0	0	0	0	sp|P02663|CASA2_BOVIN	138	150
LNREQLSTSEENSK	0	2	0	0	0	0	sp|P02663|CASA2_BOVIN	138	151
LNREQLSTSEENSK	0	1	0	0	0	0	sp|P02663|CASA2_BOVIN	138	151
LNREQLSTSEENSK	0	0	0	0	0	1	sp|P02663|CASA2_BOVIN	138	151
LNREQLSTSEENSKK	0	1	0	0	0	0	sp|P02663|CASA2_BOVIN	138	152
LNREQLSTSEENSKK	0	2	0	0	0	0	sp|P02663|CASA2_BOVIN	138	152
LNREQLSTSEENSKKT	0	2	0	0	0	0	sp|P02663|CASA2_BOVIN	138	153
LNREQLSTSEENSKKTVD	0	1	0	0	0	0	sp|P02663|CASA2_BOVIN	138	155
LNREQLSTSEENSKKTVD	0	2	0	0	0	0	sp|P02663|CASA2_BOVIN	138	155
LPLNDVAQAQRSRPELTAR	0	0	0	0	0	0	tr|F1MTM9|F1MTM9_BOVIN	670	688
LPLPLL	0	0	0	0	0	0	sp|P02666|CASB_BOVIN	150	155
LPPDVEFNRPF	0	0	0	0	0	0	sp|P34955|A1AT_BOVIN	382	392
LPPTVMFPPQ	0	0	1	0	0	0	sp|P02666|CASB_BOVIN	166	175
LPPTVMFPPQ	0	0	0	0	0	0	sp|P02666|CASB_BOVIN	166	175
LPQEVLNENLL	0	0	0	0	0	0	sp|P02662|CASA1_BOVIN	26	36
LPQEVLNENLLR	0	0	0	0	0	0	sp|P02662|CASA1_BOVIN	26	37
LPQNIPPLTQTPV	0	0	0	0	0	0	sp|P02666|CASB_BOVIN	85	97
LPQNIPPLTQTPVVVPPF	0	0	0	0	0	0	sp|P02666|CASB_BOVIN	85	102
LSDPSQDLQF	0	0	0	0	0	0	tr|F1N5Q5|F1N5Q5_BOVIN	238	247
LSFRHKVTGLHSGTLQ	0	0	0	0	0	0	tr|E1BBK6|E1BBK6_BOVIN	512	527
LSKDIGSESTED	0	0	0	0	0	0	sp|P02662|CASA1_BOVIN	55	66
LSKDIGSESTEDQ	0	0	0	0	0	0	sp|P02662|CASA1_BOVIN	55	67
LSKDIGSESTEDQA	0	0	0	0	0	0	sp|P02662|CASA1_BOVIN	55	68
LSKDIGSESTEDQAM	0	0	1	0	0	0	sp|P02662|CASA1_BOVIN	55	69
LSKDIGSESTEDQAMEDIK	0	0	1	0	0	0	sp|P02662|CASA1_BOVIN	55	73
LSKDIGSESTEDQAMEDIK	0	0	0	0	0	0	sp|P02662|CASA1_BOVIN	55	73
LSSSEESITR	0	0	0	0	0	0	sp|P02666|CASB_BOVIN	31	40
LSTSEENSKKTVD	0	1	0	0	0	0	sp|P02663|CASA2_BOVIN	143	155
LTDVENLHLPLPL	0	0	0	0	0	0	sp|P02666|CASB_BOVIN	142	154
LTDVENLHLPLPLL	0	0	0	0	0	0	sp|P02666|CASB_BOVIN	142	155
LTDVENLHLPLPLLQ	0	0	0	0	0	0	sp|P02666|CASB_BOVIN	142	156
LTDVENLHLPLPLLQ	0	0	0	0	0	1	sp|P02666|CASB_BOVIN	142	156
LTDVENLHLPLPLLQS	0	0	0	0	0	0	sp|P02666|CASB_BOVIN	142	157
LTEEEKNRL	0	0	0	0	0	0	sp|P02663|CASA2_BOVIN	168	176
LTEEEKNRLNFL	0	0	0	0	0	0	sp|P02663|CASA2_BOVIN	168	179
LTLTDVENLHLPLP	0	0	0	0	0	0	sp|P02666|CASB_BOVIN	140	153
LTLTDVENLHLPLPL	0	0	0	0	0	0	sp|P02666|CASB_BOVIN	140	154
LTPGAP	0	1	0	0	0	0	tr|E1BN28|E1BN28_BOVIN	779	784
LVPGGGV	0	0	0	0	0	0	tr|F1MFY5|F1MFY5_BOVIN	1097	1103
LVRTPEVDDEALE	0	0	0	0	0	0	sp|P02754|LACB_BOVIN	138	150
LVYPFPGPI	0	0	0	0	0	0	sp|P02666|CASB_BOVIN	73	81
LVYPFPGPIPN	0	0	0	0	0	0	sp|P02666|CASB_BOVIN	73	83
LVYPFPGPIPNSLPQNIPPLTQTPVVVPPF	0	0	0	0	0	0	sp|P02666|CASB_BOVIN	73	102
LYQEPVLGPV	0	0	0	0	0	0	sp|P02666|CASB_BOVIN	207	216
LYQEPVLGPVRGPF	0	0	0	0	0	0	sp|P02666|CASB_BOVIN	207	220
LYQEPVLGPVRGPFP	0	0	0	0	0	0	sp|P02666|CASB_BOVIN	207	221
LYQEPVLGPVRGPFPI	0	0	0	0	0	0	sp|P02666|CASB_BOVIN	207	222
LYQEPVLGPVRGPFPII	0	0	0	0	0	0	sp|P02666|CASB_BOVIN	207	223
LYQEPVLGPVRGPFPIIV	0	0	0	0	0	0	sp|P02666|CASB_BOVIN	207	224
LYQGPIVLNPWDQVK	0	0	0	0	0	1	sp|P02663|CASA2_BOVIN	114	128
LYQGPIVLNPWDQVKR	0	0	0	0	0	0	sp|P02663|CASA2_BOVIN	114	129
MAPKHKEMPF	0	0	0	0	0	0	sp|P02666|CASB_BOVIN	117	126
MESTEVFTK	0	0	0	0	0	0	sp|P02663|CASA2_BOVIN	156	164
MGLLMGEARAALKWADGKMI	0	0	1	0	0	0	sp|Q3MHH4|SYQ_BOVIN	146	165
MHQPHQPLPPT	0	0	1	0	0	0	sp|P02666|CASB_BOVIN	159	169
MHQPHQPLPPT	0	0	0	0	0	0	sp|P02666|CASB_BOVIN	159	169
MHQPHQPLPPTVMFPPQ	0	0	1	0	0	0	sp|P02666|CASB_BOVIN	159	175
MHQPHQPLPPTVMFPPQ	0	0	2	0	0	0	sp|P02666|CASB_BOVIN	159	175
MHQPHQPLPPTVMFPPQ	0	0	0	0	0	0	sp|P02666|CASB_BOVIN	159	175
MHQPHQPLPPTVMFPPQ	0	0	0	0	0	1	sp|P02666|CASB_BOVIN	159	175
MKEGIHAQQ	0	0	0	0	0	0	sp|P02662|CASA1_BOVIN	138	146
MKPWIQPK	0	0	1	0	0	0	sp|P02663|CASA2_BOVIN	205	212
MKPWIQPK	0	0	0	0	0	0	sp|P02663|CASA2_BOVIN	205	212
MPFPKYPVEP	0	0	1	0	0	0	sp|P02666|CASB_BOVIN	124	133
MPFPKYPVEP	0	0	0	0	0	0	sp|P02666|CASB_BOVIN	124	133
MPFPKYPVEPF	0	0	1	0	0	0	sp|P02666|CASB_BOVIN	124	134
MPFPKYPVEPF	0	0	0	0	0	0	sp|P02666|CASB_BOVIN	124	134
MPFPKYPVEPFT	0	0	1	0	0	0	sp|P02666|CASB_BOVIN	124	135
MPFPKYPVEPFT	0	0	0	0	0	0	sp|P02666|CASB_BOVIN	124	135
MPFPKYPVEPFTE	0	0	0	0	0	0	sp|P02666|CASB_BOVIN	124	136
MPFPKYPVEPFTES	0	0	0	0	0	0	sp|P02666|CASB_BOVIN	124	137
MPFPKYPVEPFTESQ	0	0	0	0	0	0	sp|P02666|CASB_BOVIN	124	138
MVKDEDVHFSLGV	0	0	1	0	0	0	tr|E1BCS0|E1BCS0_BOVIN	7	19
MVLTGVPPF	0	0	1	0	0	0	tr|G3MWP6|G3MWP6_BOVIN	2	10
NAVPITPTLN	0	0	0	0	0	0	sp|P02663|CASA2_BOVIN	130	139
NEINQFYQKFPQYLQYLYQGPIVLNPWDQVKR	0	0	0	0	0	1	sp|P02663|CASA2_BOVIN	98	129
NELSKDIGSESTED	0	0	0	0	0	0	sp|P02662|CASA1_BOVIN	53	66
NELSKDIGSESTEDQA	0	0	0	0	0	0	sp|P02662|CASA1_BOVIN	53	68
NELSKDIGSESTEDQAMEDIK	0	0	1	0	0	0	sp|P02662|CASA1_BOVIN	53	73
NENLLRFF	0	0	0	0	0	0	sp|P02662|CASA1_BOVIN	32	39
NIPPLTQTPV	0	0	0	0	0	0	sp|P02666|CASB_BOVIN	88	97
NIPPLTQTPVVVPPF	0	0	0	0	0	0	sp|P02666|CASB_BOVIN	88	102
NIPPLTQTPVVVPPF	0	0	0	0	0	1	sp|P02666|CASB_BOVIN	88	102
NIPPLTQTPVVVPPFLQP	0	0	0	0	0	0	sp|P02666|CASB_BOVIN	88	105
NIPPLTQTPVVVPPFLQPE	0	0	0	0	0	0	sp|P02666|CASB_BOVIN	88	106
NIPPLTQTPVVVPPFLQPE	0	0	0	0	0	1	sp|P02666|CASB_BOVIN	88	106
NIPPLTQTPVVVPPFLQPEV	0	0	0	0	0	0	sp|P02666|CASB_BOVIN	88	107
NIPPLTQTPVVVPPFLQPEVM	0	0	1	0	0	0	sp|P02666|CASB_BOVIN	88	108
NIPPLTQTPVVVPPFLQPEVM	0	0	0	0	0	0	sp|P02666|CASB_BOVIN	88	108
NIPPLTQTPVVVPPFLQPEVMG	0	0	1	0	0	0	sp|P02666|CASB_BOVIN	88	109
NIPPLTQTPVVVPPFLQPEVMG	0	0	0	0	0	0	sp|P02666|CASB_BOVIN	88	109
NIPPLTQTPVVVPPFLQPEVMGV	0	0	0	0	0	0	sp|P02666|CASB_BOVIN	88	110
NIPPLTQTPVVVPPFLQPEVMGV	0	0	0	0	0	1	sp|P02666|CASB_BOVIN	88	110
NIPPLTQTPVVVPPFLQPEVMGVS	0	0	0	0	0	0	sp|P02666|CASB_BOVIN	88	111
NIPPLTQTPVVVPPFLQPEVMGVSKVKEAMAPK	0	0	0	0	0	1	sp|P02666|CASB_BOVIN	88	120
NKKIEKFQSEEQQQTED	0	0	0	0	0	0	sp|P02666|CASB_BOVIN	42	58
NKKIEKFQSEEQQQTED	0	1	0	0	0	0	sp|P02666|CASB_BOVIN	42	58
NLHLPLPLLQ	0	0	0	0	0	0	sp|P02666|CASB_BOVIN	147	156
NLHLPLPLLQS	0	0	0	0	0	0	sp|P02666|CASB_BOVIN	147	157
NNQFLPYPY	0	0	0	0	0	0	sp|P02668|CASK_BOVIN	73	81
NNQFLPYPY	0	0	0	0	0	1	sp|P02668|CASK_BOVIN	73	81
NPIGSENSEKT	0	0	0	0	0	1	sp|P02662|CASA1_BOVIN	199	209
NPIGSENSEKTTMP	0	0	0	0	0	1	sp|P02662|CASA1_BOVIN	199	212
NPIGSENSEKTTMP	0	0	1	0	0	0	sp|P02662|CASA1_BOVIN	199	212
NPWDQVK	0	0	0	0	0	0	sp|P02663|CASA2_BOVIN	122	128
NPWDQVKR	0	0	0	0	0	0	sp|P02663|CASA2_BOVIN	122	129
NREQLSTSEEN	0	0	0	0	0	0	sp|P02663|CASA2_BOVIN	139	149
NREQLSTSEENSK	0	1	0	0	0	0	sp|P02663|CASA2_BOVIN	139	151
NREQLSTSEENSKKTVD	0	1	0	0	0	0	sp|P02663|CASA2_BOVIN	139	155
NSEKTTMPL	0	0	0	0	0	0	sp|P02662|CASA1_BOVIN	205	213
NVPGEIVESL	0	0	0	0	0	0	sp|P02666|CASB_BOVIN	22	31
NVPGEIVESLSSSEESIT	0	2	0	0	0	0	sp|P02666|CASB_BOVIN	22	39
NVPGEIVESLSSSEESIT	0	1	0	0	0	0	sp|P02666|CASB_BOVIN	22	39
NVPGEIVESLSSSEESIT	0	3	0	0	0	0	sp|P02666|CASB_BOVIN	22	39
NVPGEIVESLSSSEESIT	0	0	0	0	0	0	sp|P02666|CASB_BOVIN	22	39
NVPGEIVESLSSSEESITR	0	1	0	0	0	0	sp|P02666|CASB_BOVIN	22	40
NVPGEIVESLSSSEESITRIN	0	3	0	0	0	0	sp|P02666|CASB_BOVIN	22	42
PFPKYPVEP	0	0	0	0	0	0	sp|P02666|CASB_BOVIN	125	133
PFPKYPVEPF	0	0	0	0	0	0	sp|P02666|CASB_BOVIN	125	134
PFPKYPVEPFT	0	0	0	0	0	0	sp|P02666|CASB_BOVIN	125	135
PFTESQSLTLTDVENLHLPLPLLQS	0	0	0	0	0	0	sp|P02666|CASB_BOVIN	133	157
PGEPVVEVLSRPRP	0	0	0	0	0	0	sp|Q1JQD7|MOCS1_BOVIN	32	45
PGKSGAAAAAAAAAAAAAAAAAA	0	0	0	0	0	0	tr|E1BME7|E1BME7_BOVIN	237	259
PGPIPNSLP	0	0	0	0	0	1	sp|P02666|CASB_BOVIN	78	86
PGPIPNSLPQ	0	0	0	0	0	1	sp|P02666|CASB_BOVIN	78	87
PHPELLLRGGAAARRLP	0	0	0	0	0	0	tr|G3MX55|G3MX55_BOVIN	210	226
PHQPLPPT	0	0	0	0	0	0	sp|P02666|CASB_BOVIN	162	169
PHQPLPPTVM	0	0	1	0	0	0	sp|P02666|CASB_BOVIN	162	171
PHQPLPPTVMFPPQ	0	0	1	0	0	0	sp|P02666|CASB_BOVIN	162	175
PHQPLPPTVMFPPQ	0	0	0	0	0	0	sp|P02666|CASB_BOVIN	162	175
PIVLNPWDQVK	0	0	0	0	0	0	sp|P02663|CASA2_BOVIN	118	128
PKYPVEPF	0	0	0	0	0	0	sp|P02666|CASB_BOVIN	127	134
PKYPVEPFT	0	0	0	0	0	0	sp|P02666|CASB_BOVIN	127	135
PKYPVEPFTES	0	0	0	0	0	0	sp|P02666|CASB_BOVIN	127	137
PLGTQYTDAPSFSDIPNPIGSE	0	1	0	0	0	0	sp|P02662|CASA1_BOVIN	183	204
PLGTQYTDAPSFSDIPNPIGSENSEKTTMPL	0	0	0	0	0	1	sp|P02662|CASA1_BOVIN	183	213
PLGTQYTDAPSFSDIPNPIGSENSEKTTMPLW	0	0	0	0	0	1	sp|P02662|CASA1_BOVIN	183	214
PLPPTVMFPPQ	0	0	1	0	0	0	sp|P02666|CASB_BOVIN	165	175
PLPPTVMFPPQ	0	0	0	0	0	0	sp|P02666|CASB_BOVIN	165	175
PMIGVNQ	0	0	0	0	0	0	sp|P02662|CASA1_BOVIN	149	155
PMIGVNQEL	0	0	1	0	0	0	sp|P02662|CASA1_BOVIN	149	157
PNPIGSEN	0	0	0	0	0	0	sp|P02662|CASA1_BOVIN	198	205
PNPIGSENSEK	0	0	0	0	0	1	sp|P02662|CASA1_BOVIN	198	208
PNPIGSENSEKT	0	0	0	0	0	0	sp|P02662|CASA1_BOVIN	198	209
PNPIGSENSEKT	0	0	0	0	0	1	sp|P02662|CASA1_BOVIN	198	209
PNPIGSENSEKTT	0	0	0	0	0	1	sp|P02662|CASA1_BOVIN	198	210
PNPIGSENSEKTTMPLW	0	0	1	0	0	0	sp|P02662|CASA1_BOVIN	198	214
PPFLQPEVM	0	0	1	0	0	0	sp|P02666|CASB_BOVIN	100	108
PPFLQPEVM	0	0	0	0	0	0	sp|P02666|CASB_BOVIN	100	108
PPLTQTPVVVPPF	0	0	0	0	0	0	sp|P02666|CASB_BOVIN	90	102
PPLTQTPVVVPPFLQ	0	0	0	0	0	1	sp|P02666|CASB_BOVIN	90	104
PPLTQTPVVVPPFLQ	0	0	0	0	0	0	sp|P02666|CASB_BOVIN	90	104
PPLTQTPVVVPPFLQPEV	0	0	0	0	0	0	sp|P02666|CASB_BOVIN	90	107
PPLTQTPVVVPPFLQPEV	0	0	0	0	0	1	sp|P02666|CASB_BOVIN	90	107
PPLTQTPVVVPPFLQPEVMGVS	0	0	0	0	0	0	sp|P02666|CASB_BOVIN	90	111
PPLTQTPVVVPPFLQPEVMGVS	0	0	1	0	0	0	sp|P02666|CASB_BOVIN	90	111
PPLTQTPVVVPPFLQPEVMGVSKV	0	0	1	0	0	0	sp|P02666|CASB_BOVIN	90	113
PPLTQTPVVVPPFLQPEVMGVSKVKEAMAPKHKEMPFPK	0	0	0	0	0	0	sp|P02666|CASB_BOVIN	90	128
PPPLPL	0	0	0	0	0	0	tr|E1BN28|E1BN28_BOVIN	807	812
PPTVMFPPQ	0	0	1	0	0	0	sp|P02666|CASB_BOVIN	167	175
PPTVMFPPQ	0	0	0	0	0	0	sp|P02666|CASB_BOVIN	167	175
PQLEIVPNSAEERL	0	0	0	0	0	1	sp|P02662|CASA1_BOVIN	122	135
PQLEIVPNSAEERLH	0	1	0	0	0	0	sp|P02662|CASA1_BOVIN	122	136
PQNIPPLTQTPVVVPPF	0	0	0	0	0	0	sp|P02666|CASB_BOVIN	86	102
PQNIPPLTQTPVVVPPFLQPE	0	0	0	0	0	0	sp|P02666|CASB_BOVIN	86	106
PQRDMPIQ	0	0	0	0	0	0	sp|P02666|CASB_BOVIN	196	203
PQRDMPIQ	0	0	0	0	0	1	sp|P02666|CASB_BOVIN	196	203
PQRDMPIQA	0	0	0	0	0	0	sp|P02666|CASB_BOVIN	196	204
PSFSDIPNPIGSE	0	0	0	0	0	0	sp|P02662|CASA1_BOVIN	192	204
PSFSDIPNPIGSEN	0	0	0	0	0	0	sp|P02662|CASA1_BOVIN	192	205
PSFSDIPNPIGSENSE	0	0	0	0	0	0	sp|P02662|CASA1_BOVIN	192	207
PSFSDIPNPIGSENSEK	0	0	0	0	0	0	sp|P02662|CASA1_BOVIN	192	208
PSFSDIPNPIGSENSEK	0	0	0	0	0	1	sp|P02662|CASA1_BOVIN	192	208
PSFSDIPNPIGSENSEKT	0	0	0	0	0	0	sp|P02662|CASA1_BOVIN	192	209
PTPEGDLEILL	0	0	0	0	0	0	sp|P02754|LACB_BOVIN	64	74
PVELGPVH	0	0	0	0	0	0	tr|F1N6K7|F1N6K7_BOVIN	1956	1963
PVEPFTES	0	0	0	0	0	0	sp|P02666|CASB_BOVIN	130	137
PVEPFTESQ	0	0	0	0	0	0	sp|P02666|CASB_BOVIN	130	138
PVEPFTESQSLTLTDVENLHLPLPLLQS	0	0	0	0	0	0	sp|P02666|CASB_BOVIN	130	157
PVEPFTESQSLTLTDVENLHLPLPLLQS	0	0	0	0	0	1	sp|P02666|CASB_BOVIN	130	157
PVKPTEAVSPSS	0	0	0	0	0	0	tr|F1MNQ3|F1MNQ3_BOVIN	55	66
PVLGPVRGPF	0	0	0	0	0	0	sp|P02666|CASB_BOVIN	211	220
PVLGPVRGPFP	0	0	0	0	0	0	sp|P02666|CASB_BOVIN	211	221
PVLGPVRGPFPI	0	0	0	0	0	0	sp|P02666|CASB_BOVIN	211	222
PVLGRQRNV	0	0	0	0	0	0	tr|G3N0H2|G3N0H2_BOVIN	808	816
PVRGPFP	0	0	0	0	0	0	sp|P02666|CASB_BOVIN	215	221
PVVVPPF	0	0	0	0	0	0	sp|P02666|CASB_BOVIN	96	102
PVVVPPFLQPE	0	0	0	0	0	0	sp|P02666|CASB_BOVIN	96	106
PVVVPPFLQPEV	0	0	0	0	0	0	sp|P02666|CASB_BOVIN	96	107
PVVVPPFLQPEVM	0	0	1	0	0	0	sp|P02666|CASB_BOVIN	96	108
PVVVPPFLQPEVM	0	0	0	0	0	0	sp|P02666|CASB_BOVIN	96	108
PWIQPKT	0	0	0	0	0	0	sp|P02663|CASA2_BOVIN	207	213
PYPQRDMP	0	0	0	0	0	0	sp|P02666|CASB_BOVIN	194	201
PYPQRDMPIQ	0	0	0	0	0	0	sp|P02666|CASB_BOVIN	194	203
QDIIEALISLLYGVMTPML	0	0	0	0	0	0	tr|G3X829|G3X829_BOVIN	273	291
QEKGAQDIPLIP	0	0	0	0	1	0	tr|A7Z038|A7Z038_BOVIN	414	425
QELAYFYPELF	0	0	0	0	0	0	sp|P02662|CASA1_BOVIN	155	165
QEPVLGPV	0	0	0	0	0	0	sp|P02666|CASB_BOVIN	209	216
QEPVLGPVR	0	0	0	0	1	0	sp|P02666|CASB_BOVIN	209	217
QEPVLGPVRGP	0	0	0	0	0	0	sp|P02666|CASB_BOVIN	209	219
QEPVLGPVRGPF	0	0	0	0	0	0	sp|P02666|CASB_BOVIN	209	220
QEPVLGPVRGPF	0	0	0	0	1	0	sp|P02666|CASB_BOVIN	209	220
QEPVLGPVRGPFP	0	0	0	0	0	0	sp|P02666|CASB_BOVIN	209	221
QEPVLGPVRGPFP	0	0	0	0	0	1	sp|P02666|CASB_BOVIN	209	221
QEPVLGPVRGPFP	0	0	0	0	1	0	sp|P02666|CASB_BOVIN	209	221
QEPVLGPVRGPFPI	0	0	0	0	0	0	sp|P02666|CASB_BOVIN	209	222
QEPVLGPVRGPFPI	0	0	0	0	0	1	sp|P02666|CASB_BOVIN	209	222
QEPVLGPVRGPFPI	0	0	0	0	1	0	sp|P02666|CASB_BOVIN	209	222
QEPVLGPVRGPFPII	0	0	0	0	0	0	sp|P02666|CASB_BOVIN	209	223
QEPVLGPVRGPFPII	0	0	0	0	0	1	sp|P02666|CASB_BOVIN	209	223
QEPVLGPVRGPFPII	0	0	0	0	1	0	sp|P02666|CASB_BOVIN	209	223
QEPVLGPVRGPFPIIV	0	0	0	0	0	0	sp|P02666|CASB_BOVIN	209	224
QEPVLGPVRGPFPIIV	0	0	0	0	1	0	sp|P02666|CASB_BOVIN	209	224
QEPVLGPVRGPFPIIV	0	0	0	0	0	1	sp|P02666|CASB_BOVIN	209	224
QEQNQEQPI	0	0	0	0	1	0	sp|P02668|CASK_BOVIN	22	30
QEQNQEQPIR	0	0	0	0	1	0	sp|P02668|CASK_BOVIN	22	31
QEQNQEQPIR	0	0	0	0	0	0	sp|P02668|CASK_BOVIN	22	31
QEQNQEQPIR	0	0	0	0	1	1	sp|P02668|CASK_BOVIN	22	31
QEQNQEQPIR	0	0	0	0	0	1	sp|P02668|CASK_BOVIN	22	31
QEQNQEQPIRCEK	0	0	0	0	1	0	sp|P02668|CASK_BOVIN	22	34
QEQNQEQPIRCEKDER	0	0	0	0	1	0	sp|P02668|CASK_BOVIN	22	37
QEQNQEQPIRCEKDERFF	0	0	0	0	1	1	sp|P02668|CASK_BOVIN	22	39
QEQNQEQPIRCEKDERFFSD	0	0	0	0	1	0	sp|P02668|CASK_BOVIN	22	41
QGDLVRKL	0	0	0	0	1	0	tr|A5D7A2|A5D7A2_BOVIN	74	81
QGLPQEVLNENLLR	0	0	0	0	1	0	sp|P02662|CASA1_BOVIN	24	37
QGLPQEVLNENLLRFF	0	0	0	0	0	0	sp|P02662|CASA1_BOVIN	24	39
QGPIVLNPW	0	0	0	0	0	0	sp|P02663|CASA2_BOVIN	116	124
QGPIVLNPW	0	0	0	0	1	0	sp|P02663|CASA2_BOVIN	116	124
QGPIVLNPWD	0	0	0	0	1	0	sp|P02663|CASA2_BOVIN	116	125
QGPIVLNPWDQ	0	0	0	0	1	0	sp|P02663|CASA2_BOVIN	116	126
QGPIVLNPWDQV	0	0	0	0	1	0	sp|P02663|CASA2_BOVIN	116	127
QGPIVLNPWDQVK	0	0	0	0	0	0	sp|P02663|CASA2_BOVIN	116	128
QGPIVLNPWDQVK	0	0	0	0	1	0	sp|P02663|CASA2_BOVIN	116	128
QGPIVLNPWDQVK	0	0	0	0	0	1	sp|P02663|CASA2_BOVIN	116	128
QGPIVLNPWDQVK	0	0	0	0	1	1	sp|P02663|CASA2_BOVIN	116	128
QGPIVLNPWDQVKR	0	0	0	0	0	0	sp|P02663|CASA2_BOVIN	116	129
QGPIVLNPWDQVKR	0	0	0	0	1	0	sp|P02663|CASA2_BOVIN	116	129
QGPIVLNPWDQVKR	0	0	0	0	1	1	sp|P02663|CASA2_BOVIN	116	129
QKEDVPSER	0	0	0	0	1	0	sp|P02662|CASA1_BOVIN	97	105
QKEPMIGV	0	0	1	0	1	0	sp|P02662|CASA1_BOVIN	146	153
QKEPMIGV	0	0	0	0	1	0	sp|P02662|CASA1_BOVIN	146	153
QKEPMIGVN	0	0	1	0	1	0	sp|P02662|CASA1_BOVIN	146	154
QKEPMIGVN	0	0	0	0	1	0	sp|P02662|CASA1_BOVIN	146	154
QKEPMIGVN	0	0	0	0	0	0	sp|P02662|CASA1_BOVIN	146	154
QKEPMIGVN	0	0	0	0	1	1	sp|P02662|CASA1_BOVIN	146	154
QKEPMIGVNQ	0	0	1	0	0	0	sp|P02662|CASA1_BOVIN	146	155
QKEPMIGVNQ	0	0	0	0	0	0	sp|P02662|CASA1_BOVIN	146	155
QKEPMIGVNQ	0	0	1	0	1	0	sp|P02662|CASA1_BOVIN	146	155
QKEPMIGVNQ	0	0	0	0	1	0	sp|P02662|CASA1_BOVIN	146	155
QKEPMIGVNQE	0	0	0	0	1	0	sp|P02662|CASA1_BOVIN	146	156
QKEPMIGVNQEL	0	0	0	0	0	0	sp|P02662|CASA1_BOVIN	146	157
QKEPMIGVNQEL	0	0	1	0	1	0	sp|P02662|CASA1_BOVIN	146	157
QKEPMIGVNQEL	0	0	0	0	1	0	sp|P02662|CASA1_BOVIN	146	157
QKEPMIGVNQELA	0	0	1	0	1	0	sp|P02662|CASA1_BOVIN	146	158
QKEPMIGVNQELA	0	0	0	0	1	0	sp|P02662|CASA1_BOVIN	146	158
QKFALPQYL	0	0	0	0	1	0	sp|P02663|CASA2_BOVIN	187	195
QLEIVPNSAEERLH	0	0	0	0	0	1	sp|P02662|CASA1_BOVIN	123	136
QLEIVPNSAEERLH	0	0	0	0	1	1	sp|P02662|CASA1_BOVIN	123	136
QLEIVPNSAEERLH	0	0	0	0	0	2	sp|P02662|CASA1_BOVIN	123	136
QLEIVPNSAEERLH	0	1	0	0	0	0	sp|P02662|CASA1_BOVIN	123	136
QLEIVPNSAEERLH	0	0	0	0	1	0	sp|P02662|CASA1_BOVIN	123	136
QLEIVPNSAEERLH	0	1	0	0	1	0	sp|P02662|CASA1_BOVIN	123	136
QPHQPLPPT	0	0	0	0	0	0	sp|P02666|CASB_BOVIN	161	169
QPHQPLPPT	0	0	0	0	1	0	sp|P02666|CASB_BOVIN	161	169
QPHQPLPPTV	0	0	0	0	1	0	sp|P02666|CASB_BOVIN	161	170
QPHQPLPPTVM	0	0	1	0	0	0	sp|P02666|CASB_BOVIN	161	171
QPHQPLPPTVM	0	0	0	0	1	0	sp|P02666|CASB_BOVIN	161	171
QPHQPLPPTVMFP	0	0	1	0	1	0	sp|P02666|CASB_BOVIN	161	173
QPHQPLPPTVMFP	0	0	0	0	1	0	sp|P02666|CASB_BOVIN	161	173
QPHQPLPPTVMFPP	0	0	0	0	1	0	sp|P02666|CASB_BOVIN	161	174
QPHQPLPPTVMFPPQ	0	0	1	0	0	0	sp|P02666|CASB_BOVIN	161	175
QPHQPLPPTVMFPPQ	0	0	0	0	0	0	sp|P02666|CASB_BOVIN	161	175
QPHQPLPPTVMFPPQ	0	0	1	0	1	0	sp|P02666|CASB_BOVIN	161	175
QPHQPLPPTVMFPPQ	0	0	0	0	1	0	sp|P02666|CASB_BOVIN	161	175
QPLPPTVM	0	0	1	0	0	0	sp|P02666|CASB_BOVIN	164	171
QPLPPTVMFPPQ	0	0	1	0	0	0	sp|P02666|CASB_BOVIN	164	175
QPLPPTVMFPPQ	0	0	0	0	0	0	sp|P02666|CASB_BOVIN	164	175
QPLPPTVMFPPQ	0	0	1	0	1	0	sp|P02666|CASB_BOVIN	164	175
QPLPPTVMFPPQ	0	0	0	0	1	0	sp|P02666|CASB_BOVIN	164	175
QPLPPTVMFPPQS	0	0	0	0	1	0	sp|P02666|CASB_BOVIN	164	176
QPNFEEDKFLGRW	0	0	0	0	1	0	sp|O02853|PTGDS_BOVIN	31	43
QQKEPMIGVN	0	0	0	0	0	0	sp|P02662|CASA1_BOVIN	145	154
QQKEPMIGVN	0	0	1	0	1	0	sp|P02662|CASA1_BOVIN	145	154
QQKEPMIGVN	0	0	0	0	1	0	sp|P02662|CASA1_BOVIN	145	154
QQKEPMIGVNQ	0	0	0	0	0	0	sp|P02662|CASA1_BOVIN	145	155
QQKEPMIGVNQ	0	0	1	0	1	0	sp|P02662|CASA1_BOVIN	145	155
QQKEPMIGVNQ	0	0	0	0	1	0	sp|P02662|CASA1_BOVIN	145	155
QQKEPMIGVNQEL	0	0	1	0	1	0	sp|P02662|CASA1_BOVIN	145	157
QQKEPMIGVNQEL	0	0	0	0	1	0	sp|P02662|CASA1_BOVIN	145	157
QQKEPMIGVNQELA	0	0	0	0	1	0	sp|P02662|CASA1_BOVIN	145	158
QQKEPMIGVNQELAYFYPE	0	0	0	0	1	0	sp|P02662|CASA1_BOVIN	145	163
QQKEPMIGVNQELAYFYPEL	0	0	1	0	1	0	sp|P02662|CASA1_BOVIN	145	164
QQKEPMIGVNQELAYFYPEL	0	0	0	0	1	0	sp|P02662|CASA1_BOVIN	145	164
QQKEPMIGVNQELAYFYPEL	0	0	0	0	1	1	sp|P02662|CASA1_BOVIN	145	164
QQKEPMIGVNQELAYFYPELFR	0	0	1	0	1	0	sp|P02662|CASA1_BOVIN	145	166
QQKEPMIGVNQELAYFYPELFR	0	0	0	0	1	0	sp|P02662|CASA1_BOVIN	145	166
QQKPVALIN	0	0	0	0	1	0	sp|P02668|CASK_BOVIN	65	73
QQLAAGLRKCP	0	0	0	0	1	0	tr|F1MG35|F1MG35_BOVIN	1122	1132
QQPFQVSPQP	0	0	0	0	0	1	tr|F1N2W4|F1N2W4_BOVIN	552	561
QQTEDELQDKIHP	0	0	0	0	1	0	sp|P02666|CASB_BOVIN	54	66
QSEEQQQTEDELQDKIHP	0	0	0	0	1	0	sp|P02666|CASB_BOVIN	49	66
QSEEQQQTEDELQDKIHP	0	0	0	0	0	0	sp|P02666|CASB_BOVIN	49	66
QSEEQQQTEDELQDKIHPF	0	0	0	0	0	0	sp|P02666|CASB_BOVIN	49	67
QSEEQQQTEDELQDKIHPF	0	0	0	0	1	0	sp|P02666|CASB_BOVIN	49	67
QSKVLPVPQ	0	0	0	0	0	0	sp|P02666|CASB_BOVIN	182	190
QSKVLPVPQK	0	0	0	0	0	0	sp|P02666|CASB_BOVIN	182	191
QSKVLPVPQK	0	0	0	0	1	0	sp|P02666|CASB_BOVIN	182	191
QSLTLTDVEN	0	0	0	0	1	0	sp|P02666|CASB_BOVIN	138	147
QSLTLTDVENLHLPLP	0	0	0	0	0	0	sp|P02666|CASB_BOVIN	138	153
QSLTLTDVENLHLPLP	0	0	0	0	1	0	sp|P02666|CASB_BOVIN	138	153
QSLTLTDVENLHLPLPL	0	0	0	0	0	0	sp|P02666|CASB_BOVIN	138	154
QSLTLTDVENLHLPLPL	0	0	0	0	1	0	sp|P02666|CASB_BOVIN	138	154
QSLTLTDVENLHLPLPLLQ	0	0	0	0	0	0	sp|P02666|CASB_BOVIN	138	156
QSLVYPFPGPIP	0	0	0	0	1	0	sp|P02666|CASB_BOVIN	71	82
QSLVYPFPGPIPN	0	0	0	0	0	0	sp|P02666|CASB_BOVIN	71	83
QSWMHQPH	0	0	1	0	1	0	sp|P02666|CASB_BOVIN	156	163
QSWMHQPH	0	0	0	0	1	0	sp|P02666|CASB_BOVIN	156	163
QTEDELQDKIHP	0	0	0	0	1	0	sp|P02666|CASB_BOVIN	55	66
QTEDELQDKIHPF	0	0	0	0	0	0	sp|P02666|CASB_BOVIN	55	67
QTEDELQDKIHPF	0	0	0	0	1	0	sp|P02666|CASB_BOVIN	55	67
QTISNAPVSEYMNQAALFG	0	0	1	0	1	0	tr|F1N342|F1N342_BOVIN	469	487
QTISNAPVSEYMNQAALFGGNPRYENVPL	0	0	0	0	1	1	tr|F1N342|F1N342_BOVIN	469	497
QTPVVVPPF	0	0	0	0	1	0	sp|P02666|CASB_BOVIN	94	102
QTPVVVPPFL	0	0	0	0	0	0	sp|P02666|CASB_BOVIN	94	103
QTPVVVPPFL	0	0	0	0	1	0	sp|P02666|CASB_BOVIN	94	103
QTPVVVPPFLQPE	0	0	0	0	0	0	sp|P02666|CASB_BOVIN	94	106
QTPVVVPPFLQPE	0	0	0	0	1	0	sp|P02666|CASB_BOVIN	94	106
QTPVVVPPFLQPEV	0	0	0	0	0	0	sp|P02666|CASB_BOVIN	94	107
QTPVVVPPFLQPEVM	0	0	1	0	0	0	sp|P02666|CASB_BOVIN	94	108
QTPVVVPPFLQPEVM	0	0	0	0	0	0	sp|P02666|CASB_BOVIN	94	108
QTPVVVPPFLQPEVM	0	0	1	0	1	0	sp|P02666|CASB_BOVIN	94	108
QTPVVVPPFLQPEVM	0	0	0	0	1	0	sp|P02666|CASB_BOVIN	94	108
QTQPSQSQNPGPA	0	0	0	0	0	0	tr|F1MR18|F1MR18_BOVIN	263	275
QYLYQGPIVLNPWDQVKR	0	0	0	0	0	0	sp|P02663|CASA2_BOVIN	112	129
QYLYQGPIVLNPWDQVKR	0	0	0	0	1	0	sp|P02663|CASA2_BOVIN	112	129
QYTDAPSFSDIPNPIGSEN	0	0	0	0	1	0	sp|P02662|CASA1_BOVIN	187	205
RDMPIQAFLLYQEPVLGPVRGPFPIIV	0	0	0	0	0	1	sp|P02666|CASB_BOVIN	198	224
RELEELNVPGEIVESL	0	0	0	0	0	0	sp|P02666|CASB_BOVIN	16	31
RELEELNVPGEIVESLS	0	0	0	0	0	0	sp|P02666|CASB_BOVIN	16	32
RELKDLKGY	0	0	0	0	0	0	sp|P00711|LALBA_BOVIN	29	37
REQLSTSEENSKKTVD	0	1	0	0	0	0	sp|P02663|CASA2_BOVIN	140	155
REQLSTSEENSKKTVD	0	2	0	0	0	0	sp|P02663|CASA2_BOVIN	140	155
RNAVPITPT	0	0	0	0	0	0	sp|P02663|CASA2_BOVIN	129	137
RNAVPITPTLN	0	0	0	0	0	1	sp|P02663|CASA2_BOVIN	129	139
RPKHPIKHQ	0	0	0	0	0	0	sp|P02662|CASA1_BOVIN	16	24
RSLEELSSHFYTII	0	0	0	0	0	0	tr|E1BD56|E1BD56_BOVIN	219	232
RSVDGKEDLIWKL	0	0	0	0	0	0	sp|P24627|TRFL_BOVIN	277	289
RTPEVDDEAL	0	0	0	0	0	0	sp|P02754|LACB_BOVIN	140	149
RTPEVDDEALEK	0	0	0	0	0	0	sp|P02754|LACB_BOVIN	140	151
RTPEVDDEALEKFD	0	0	0	0	0	0	sp|P02754|LACB_BOVIN	140	153
RTPEVDDEALEKFDK	0	0	0	0	0	0	sp|P02754|LACB_BOVIN	140	154
RVYVEELKPTPEGDLE	0	0	0	0	0	0	sp|P02754|LACB_BOVIN	56	71
RVYVEELKPTPEGDLEILL	0	0	0	0	0	0	sp|P02754|LACB_BOVIN	56	74
RVYVEELKPTPEGDLEILLQ	0	0	0	0	0	0	sp|P02754|LACB_BOVIN	56	75
SAASAAGPVHSSVPSNP	0	0	0	0	0	0	tr|E1BE13|E1BE13_BOVIN	1668	1684
SAEERLH	0	1	0	0	0	0	sp|P02662|CASA1_BOVIN	130	136
SAEERLHSM	0	1	0	0	0	0	sp|P02662|CASA1_BOVIN	130	138
SDIPNPIGS	0	0	0	0	0	0	sp|P02662|CASA1_BOVIN	195	203
SDIPNPIGSE	0	0	0	0	0	0	sp|P02662|CASA1_BOVIN	195	204
SDIPNPIGSEN	0	0	0	0	0	0	sp|P02662|CASA1_BOVIN	195	205
SDIPNPIGSEN	0	0	0	0	0	1	sp|P02662|CASA1_BOVIN	195	205
SDIPNPIGSENS	0	0	0	0	0	0	sp|P02662|CASA1_BOVIN	195	206
SDIPNPIGSENS	0	0	0	0	0	1	sp|P02662|CASA1_BOVIN	195	206
SDIPNPIGSENSE	0	0	0	0	0	0	sp|P02662|CASA1_BOVIN	195	207
SDIPNPIGSENSE	0	0	0	0	0	1	sp|P02662|CASA1_BOVIN	195	207
SDIPNPIGSENSEK	0	0	0	0	0	1	sp|P02662|CASA1_BOVIN	195	208
SDIPNPIGSENSEK	0	0	0	0	0	0	sp|P02662|CASA1_BOVIN	195	208
SDIPNPIGSENSEKT	0	0	0	0	0	0	sp|P02662|CASA1_BOVIN	195	209
SDIPNPIGSENSEKT	0	0	0	0	0	1	sp|P02662|CASA1_BOVIN	195	209
SDIPNPIGSENSEKTT	0	0	0	0	0	0	sp|P02662|CASA1_BOVIN	195	210
SDIPNPIGSENSEKTT	0	0	0	0	0	1	sp|P02662|CASA1_BOVIN	195	210
SDIPNPIGSENSEKTTM	0	0	0	0	0	0	sp|P02662|CASA1_BOVIN	195	211
SDIPNPIGSENSEKTTM	0	0	0	0	0	1	sp|P02662|CASA1_BOVIN	195	211
SDIPNPIGSENSEKTTM	0	0	1	0	0	0	sp|P02662|CASA1_BOVIN	195	211
SDIPNPIGSENSEKTTMP	0	0	1	0	0	0	sp|P02662|CASA1_BOVIN	195	212
SDIPNPIGSENSEKTTMP	0	0	0	0	0	0	sp|P02662|CASA1_BOVIN	195	212
SDIPNPIGSENSEKTTMP	0	0	0	0	0	1	sp|P02662|CASA1_BOVIN	195	212
SDIPNPIGSENSEKTTMPL	0	0	1	0	0	0	sp|P02662|CASA1_BOVIN	195	213
SDIPNPIGSENSEKTTMPL	0	0	0	0	0	1	sp|P02662|CASA1_BOVIN	195	213
SDIPNPIGSENSEKTTMPL	0	0	0	0	0	0	sp|P02662|CASA1_BOVIN	195	213
SDIPNPIGSENSEKTTMPLW	0	0	1	0	0	0	sp|P02662|CASA1_BOVIN	195	214
SDIPNPIGSENSEKTTMPLW	0	0	0	0	0	1	sp|P02662|CASA1_BOVIN	195	214
SDISLLDAQ	0	0	0	0	0	0	sp|P02754|LACB_BOVIN	43	51
SDKIAKYIPI	0	0	0	0	0	0	sp|P02668|CASK_BOVIN	40	49
SDKIAKYIPIQ	0	0	0	0	0	0	sp|P02668|CASK_BOVIN	40	50
SEEIVPNSVE	0	0	0	0	0	1	sp|P02662|CASA1_BOVIN	83	92
SEEIVPNSVEQK	0	0	0	0	0	1	sp|P02662|CASA1_BOVIN	83	94
SEEQQQTEDELQDKIHP	0	0	0	0	0	0	sp|P02666|CASB_BOVIN	50	66
SEEQQQTEDELQDKIHPF	0	0	0	0	0	0	sp|P02666|CASB_BOVIN	50	67
SEESITRINK	0	1	0	0	0	0	sp|P02666|CASB_BOVIN	34	43
SEKTTMPLW	0	0	1	0	0	0	sp|P02662|CASA1_BOVIN	206	214
SEKTTMPLW	0	0	0	0	0	0	sp|P02662|CASA1_BOVIN	206	214
SFSDIPNPIGSEN	0	0	0	0	0	0	sp|P02662|CASA1_BOVIN	193	205
SFSDIPNPIGSENSEK	0	0	0	0	0	0	sp|P02662|CASA1_BOVIN	193	208
SFSDIPNPIGSENSEK	0	0	0	0	0	1	sp|P02662|CASA1_BOVIN	193	208
SFSDIPNPIGSENSEKT	0	0	0	0	0	1	sp|P02662|CASA1_BOVIN	193	209
SFSDIPNPIGSENSEKT	0	0	0	0	0	0	sp|P02662|CASA1_BOVIN	193	209
SGELGRKAAAFGSQLGPGLQ	0	0	0	0	0	0	tr|E1BIV1|E1BIV1_BOVIN	323	342
SHAFEVVKT	0	0	0	0	0	0	sp|P80195|GLCM1_BOVIN	145	153
SKDIGSESTED	0	0	0	0	0	0	sp|P02662|CASA1_BOVIN	56	66
SKDIGSESTEDQA	0	0	0	0	0	0	sp|P02662|CASA1_BOVIN	56	68
SKDIGSESTEDQAM	0	0	1	0	0	0	sp|P02662|CASA1_BOVIN	56	69
SKDIGSESTEDQAM	0	0	0	0	0	0	sp|P02662|CASA1_BOVIN	56	69
SKDIGSESTEDQAME	0	0	1	0	0	0	sp|P02662|CASA1_BOVIN	56	70
SKDIGSESTEDQAME	0	0	0	0	0	0	sp|P02662|CASA1_BOVIN	56	70
SKDIGSESTEDQAMED	0	0	1	0	0	0	sp|P02662|CASA1_BOVIN	56	71
SKDIGSESTEDQAMED	0	0	0	0	0	0	sp|P02662|CASA1_BOVIN	56	71
SKDIGSESTEDQAMEDIK	0	0	1	0	0	0	sp|P02662|CASA1_BOVIN	56	73
SKDIGSESTEDQAMEDIK	0	0	0	0	0	0	sp|P02662|CASA1_BOVIN	56	73
SKVLPVPQK	0	0	0	0	0	0	sp|P02666|CASB_BOVIN	183	191
SKVLPVPQKAVPYPQRDMPIQAFLLYQEPVL	0	0	0	0	0	1	sp|P02666|CASB_BOVIN	183	213
SLLPVILANTYLLVP	0	0	0	0	0	0	tr|F1MCE6|F1MCE6_BOVIN	271	285
SLPQNIPPLTQTPVVVPPF	0	0	0	0	0	0	sp|P02666|CASB_BOVIN	84	102
SLPQNIPPLTQTPVVVPPFLQPE	0	0	0	0	0	0	sp|P02666|CASB_BOVIN	84	106
SLQLNDTQVKI	0	0	0	0	0	0	tr|E1B7N3|E1B7N3_BOVIN	259	269
SLSQSKVLPVPQKAVPYPQRDMPIQAFLLYQEPVL	0	0	0	0	0	1	sp|P02666|CASB_BOVIN	179	213
SLSSSEESITR	0	0	0	0	0	0	sp|P02666|CASB_BOVIN	30	40
SLTLTDVENLHLPLP	0	0	0	0	0	0	sp|P02666|CASB_BOVIN	139	153
SLTLTDVENLHLPLPL	0	0	0	0	0	0	sp|P02666|CASB_BOVIN	139	154
SLTLTDVENLHLPLPLLQS	0	0	0	0	0	0	sp|P02666|CASB_BOVIN	139	157
SLTLTDVENLHLPLPLLQSWMHQPHQPLPPTVMFPPQSVLSL	0	0	0	0	0	1	sp|P02666|CASB_BOVIN	139	180
SLVYPFPGPI	0	0	0	0	0	0	sp|P02666|CASB_BOVIN	72	81
SLVYPFPGPIP	0	0	0	0	0	0	sp|P02666|CASB_BOVIN	72	82
SLVYPFPGPIPN	0	0	0	0	0	0	sp|P02666|CASB_BOVIN	72	83
SLVYPFPGPIPN	0	0	0	0	0	1	sp|P02666|CASB_BOVIN	72	83
SLVYPFPGPIPNSLPQ	0	0	0	0	0	0	sp|P02666|CASB_BOVIN	72	87
SLVYPFPGPIPNSLPQ	0	0	0	0	0	1	sp|P02666|CASB_BOVIN	72	87
SLVYPFPGPIPNSLPQNIPPL	0	0	0	0	0	0	sp|P02666|CASB_BOVIN	72	92
SLVYPFPGPIPNSLPQNIPPLTQTPV	0	0	0	0	0	1	sp|P02666|CASB_BOVIN	72	97
SLVYPFPGPIPNSLPQNIPPLTQTPVVVPPFLQPE	0	0	0	0	0	2	sp|P02666|CASB_BOVIN	72	106
SLVYPFPGPIPNSLPQNIPPLTQTPVVVPPFLQPEVMGVS	0	0	0	0	0	2	sp|P02666|CASB_BOVIN	72	111
SLVYPFPGPIPNSLPQNIPPLTQTPVVVPPFLQPEVMGVSK	0	0	0	0	0	1	sp|P02666|CASB_BOVIN	72	112
SMKEGIHAQQ	0	0	1	0	0	0	sp|P02662|CASA1_BOVIN	137	146
SMKEGIHAQQ	0	0	0	0	0	0	sp|P02662|CASA1_BOVIN	137	146
SNTVPAKSCQAQPTTMA	0	0	1	0	0	0	sp|P02668|CASK_BOVIN	101	117
SPDDADFVDVL	0	0	0	0	0	0	sp|P11151|LIPL_BOVIN	202	212
SQSKVLPVPQ	0	0	0	0	0	0	sp|P02666|CASB_BOVIN	181	190
SQSKVLPVPQK	0	0	0	0	0	0	sp|P02666|CASB_BOVIN	181	191
SQSKVLPVPQKAVPYPQRDMPIQ	0	1	0	0	0	0	sp|P02666|CASB_BOVIN	181	203
SQSKVLPVPQKAVPYPQRDMPIQAFLLYQEPVL	0	0	0	0	0	1	sp|P02666|CASB_BOVIN	181	213
SQSLTLTDVE	0	0	0	0	0	0	sp|P02666|CASB_BOVIN	137	146
SQSLTLTDVEN	0	0	0	0	0	0	sp|P02666|CASB_BOVIN	137	147
SQSLTLTDVEN	0	0	0	0	0	1	sp|P02666|CASB_BOVIN	137	147
SQSLTLTDVENL	0	0	0	0	0	0	sp|P02666|CASB_BOVIN	137	148
SQSLTLTDVENLHLPLP	0	0	0	0	0	0	sp|P02666|CASB_BOVIN	137	153
SQVPAKTDCVMFFGPVVPDGYGV	0	0	1	0	0	0	tr|Q08DN5|Q08DN5_BOVIN	554	576
SREHPIYPDPA	0	0	0	0	0	0	tr|F1MPW0|F1MPW0_BOVIN	709	719
SSEEIVPNSVE	0	0	0	0	0	1	sp|P02662|CASA1_BOVIN	82	92
SSEEIVPNSVEQK	0	0	0	0	0	1	sp|P02662|CASA1_BOVIN	82	94
SSEESITRI	0	0	0	0	0	0	sp|P02666|CASB_BOVIN	33	41
SSEESITRIN	0	0	0	0	0	0	sp|P02666|CASB_BOVIN	33	42
SSEESITRINK	0	0	0	0	0	0	sp|P02666|CASB_BOVIN	33	43
SSSEEIVPNSVEQK	0	0	0	0	0	1	sp|P02662|CASA1_BOVIN	81	94
SSSEESITRIN	0	0	0	0	0	0	sp|P02666|CASB_BOVIN	32	42
SSSEESITRIN	0	1	0	0	0	0	sp|P02666|CASB_BOVIN	32	42
SSSEESITRINK	0	1	0	0	0	0	sp|P02666|CASB_BOVIN	32	43
SSSEESITRINK	0	2	0	0	0	0	sp|P02666|CASB_BOVIN	32	43
SSSEESITRINK	0	3	0	0	0	0	sp|P02666|CASB_BOVIN	32	43
STEDQAMEDIK	0	0	1	0	0	0	sp|P02662|CASA1_BOVIN	63	73
STEDQAMEDIK	0	0	0	0	0	0	sp|P02662|CASA1_BOVIN	63	73
STSEENSKKTVDME	0	1	0	0	0	0	sp|P02663|CASA2_BOVIN	144	157
SWMHQPH	0	0	0	0	0	0	sp|P02666|CASB_BOVIN	157	163
SWMHQPH	0	0	1	0	0	0	sp|P02666|CASB_BOVIN	157	163
SWMHQPHQPLP	0	0	1	0	0	0	sp|P02666|CASB_BOVIN	157	167
SWMHQPHQPLPPT	0	0	0	0	0	0	sp|P02666|CASB_BOVIN	157	169
SWMHQPHQPLPPT	0	0	1	0	0	0	sp|P02666|CASB_BOVIN	157	169
SWMHQPHQPLPPTVMFPPQ	0	0	2	0	0	0	sp|P02666|CASB_BOVIN	157	175
TAPAYGQPQP	0	0	0	0	0	0	sp|P49951|CLH1_BOVIN	1660	1669
TCLPKAPGLEP	0	0	0	0	0	0	sp|Q5EA15|BHE40_BOVIN	12	22
TDAPSFSDIPNPIG	0	0	0	0	0	0	sp|P02662|CASA1_BOVIN	189	202
TDAPSFSDIPNPIGSE	0	0	0	0	0	0	sp|P02662|CASA1_BOVIN	189	204
TDAPSFSDIPNPIGSEN	0	0	0	0	0	0	sp|P02662|CASA1_BOVIN	189	205
TDAPSFSDIPNPIGSEN	0	0	0	0	0	1	sp|P02662|CASA1_BOVIN	189	205
TDAPSFSDIPNPIGSENS	0	0	0	0	0	0	sp|P02662|CASA1_BOVIN	189	206
TDAPSFSDIPNPIGSENSE	0	0	0	0	0	0	sp|P02662|CASA1_BOVIN	189	207
TDAPSFSDIPNPIGSENSEK	0	0	0	0	0	0	sp|P02662|CASA1_BOVIN	189	208
TDAPSFSDIPNPIGSENSEK	0	0	0	0	0	1	sp|P02662|CASA1_BOVIN	189	208
TDAPSFSDIPNPIGSENSEKT	0	0	0	0	0	0	sp|P02662|CASA1_BOVIN	189	209
TDAPSFSDIPNPIGSENSEKT	0	0	0	0	0	1	sp|P02662|CASA1_BOVIN	189	209
TDAPSFSDIPNPIGSENSEKTTMP	0	0	1	0	0	0	sp|P02662|CASA1_BOVIN	189	212
TDAPSFSDIPNPIGSENSEKTTMP	0	0	0	0	0	0	sp|P02662|CASA1_BOVIN	189	212
TDAPSFSDIPNPIGSENSEKTTMP	0	0	0	0	0	1	sp|P02662|CASA1_BOVIN	189	212
TDAPSFSDIPNPIGSENSEKTTMPL	0	0	1	0	0	0	sp|P02662|CASA1_BOVIN	189	213
TDAPSFSDIPNPIGSENSEKTTMPL	0	0	0	0	0	1	sp|P02662|CASA1_BOVIN	189	213
TDGEVVDLSTSKT	0	0	0	0	0	0	tr|F1N415|F1N415_BOVIN	2761	2773
TDVENLHLPL	0	0	0	0	0	0	sp|P02666|CASB_BOVIN	143	152
TDVENLHLPLP	0	0	0	0	0	0	sp|P02666|CASB_BOVIN	143	153
TDVENLHLPLPL	0	0	0	0	0	0	sp|P02666|CASB_BOVIN	143	154
TDVENLHLPLPL	0	0	0	0	0	1	sp|P02666|CASB_BOVIN	143	154
TDVENLHLPLPLL	0	0	0	0	0	1	sp|P02666|CASB_BOVIN	143	155
TDVENLHLPLPLLQ	0	0	0	0	0	0	sp|P02666|CASB_BOVIN	143	156
TDVENLHLPLPLLQ	0	0	0	0	0	1	sp|P02666|CASB_BOVIN	143	156
TDVENLHLPLPLLQS	0	0	0	0	0	0	sp|P02666|CASB_BOVIN	143	157
TDVENLHLPLPLLQSW	0	0	0	0	0	0	sp|P02666|CASB_BOVIN	143	158
TEDELQDKIHPF	0	0	0	0	0	0	sp|P02666|CASB_BOVIN	56	67
TEEVKITVDDKHYQK	0	0	0	0	0	0	sp|P02663|CASA2_BOVIN	81	95
TEIQKLVMDVA	0	0	0	0	0	0	sp|Q3SZ57|FETA_BOVIN	253	263
TESQSLTLTDVENLHLPL	0	0	0	0	0	0	sp|P02666|CASB_BOVIN	135	152
TESQSLTLTDVENLHLPLP	0	0	0	0	0	0	sp|P02666|CASB_BOVIN	135	153
TESQSLTLTDVENLHLPLPL	0	0	0	0	0	0	sp|P02666|CASB_BOVIN	135	154
TESQSLTLTDVENLHLPLPLLQ	0	0	0	0	0	0	sp|P02666|CASB_BOVIN	135	156
TESQSLTLTDVENLHLPLPLLQS	0	0	0	0	0	0	sp|P02666|CASB_BOVIN	135	157
TESQSLTLTDVENLHLPLPLLQSWMHQPHQPLPPT	0	0	0	0	0	1	sp|P02666|CASB_BOVIN	135	169
TETVISMAQETDP	0	0	0	0	0	0	tr|F1MXM6|F1MXM6_BOVIN	108	120
TISVTATAASIGAAGVPQ	0	0	0	0	0	0	sp|Q95135|EAA3_BOVIN	396	413
TKKTKLTEEEKNRLN	0	0	0	0	0	0	sp|P02663|CASA2_BOVIN	163	177
TKLTEEEKN	0	0	0	0	0	0	sp|P02663|CASA2_BOVIN	166	174
TKLTEEEKNRL	0	0	0	0	0	0	sp|P02663|CASA2_BOVIN	166	176
TKLTEEEKNRLN	0	0	0	0	0	0	sp|P02663|CASA2_BOVIN	166	177
TKLTEEEKNRLN	0	0	0	0	0	1	sp|P02663|CASA2_BOVIN	166	177
TKLTEEEKNRLNF	0	0	0	0	0	0	sp|P02663|CASA2_BOVIN	166	178
TLTDVENLHLPLP	0	0	0	0	0	0	sp|P02666|CASB_BOVIN	141	153
TLTDVENLHLPLPL	0	0	0	0	0	0	sp|P02666|CASB_BOVIN	141	154
TLTDVENLHLPLPLL	0	0	0	0	0	0	sp|P02666|CASB_BOVIN	141	155
TLTDVENLHLPLPLLQ	0	0	0	0	0	0	sp|P02666|CASB_BOVIN	141	156
TLTDVENLHLPLPLLQ	0	0	0	0	0	1	sp|P02666|CASB_BOVIN	141	156
TLTDVENLHLPLPLLQS	0	0	0	0	0	0	sp|P02666|CASB_BOVIN	141	157
TLTDVENLHLPLPLLQSW	0	0	0	0	0	0	sp|P02666|CASB_BOVIN	141	158
TLTDVENLHLPLPLLQSWMHQPHQPLPPTVMFPPQ	0	0	0	0	0	1	sp|P02666|CASB_BOVIN	141	175
TLTDVENLHLPLPLLQSWMHQPHQPLPPTVMFPPQSVL	0	0	0	0	0	1	sp|P02666|CASB_BOVIN	141	178
TPEGDLEI	0	0	0	0	0	0	sp|P02754|LACB_BOVIN	65	72
TPEGDLEIL	0	0	0	0	0	0	sp|P02754|LACB_BOVIN	65	73
TPEGDLEILL	0	0	0	0	0	0	sp|P02754|LACB_BOVIN	65	74
TPEGDLEILLQ	0	0	0	0	0	0	sp|P02754|LACB_BOVIN	65	75
TPEVDDEAL	0	0	0	0	0	0	sp|P02754|LACB_BOVIN	141	149
TPEVDDEALE	0	0	0	0	0	0	sp|P02754|LACB_BOVIN	141	150
TPEVDDEALEK	0	0	0	0	0	0	sp|P02754|LACB_BOVIN	141	151
TPEVDDEALEKF	0	0	0	0	0	0	sp|P02754|LACB_BOVIN	141	152
TPEVDDEALEKFD	0	0	0	0	0	0	sp|P02754|LACB_BOVIN	141	153
TPPALVP	0	0	0	0	0	0	tr|E1BIU5|E1BIU5_BOVIN	378	384
TPVVVPPF	0	0	0	0	0	0	sp|P02666|CASB_BOVIN	95	102
TPVVVPPFL	0	0	0	0	0	0	sp|P02666|CASB_BOVIN	95	103
TPVVVPPFLQP	0	0	0	0	0	0	sp|P02666|CASB_BOVIN	95	105
TPVVVPPFLQPE	0	0	0	0	0	0	sp|P02666|CASB_BOVIN	95	106
TPVVVPPFLQPE	0	0	0	0	0	1	sp|P02666|CASB_BOVIN	95	106
TPVVVPPFLQPEV	0	0	0	0	0	0	sp|P02666|CASB_BOVIN	95	107
TPVVVPPFLQPEVM	0	0	1	0	0	0	sp|P02666|CASB_BOVIN	95	108
TPVVVPPFLQPEVM	0	0	0	0	0	0	sp|P02666|CASB_BOVIN	95	108
TPVVVPPFLQPEVMG	0	0	0	0	0	0	sp|P02666|CASB_BOVIN	95	109
TQSLVYPFPGPIPN	0	0	0	0	0	0	sp|P02666|CASB_BOVIN	70	83
TQTPVVVPPF	0	0	0	0	0	0	sp|P02666|CASB_BOVIN	93	102
TQTPVVVPPFLQPE	0	0	0	0	0	0	sp|P02666|CASB_BOVIN	93	106
TQTPVVVPPFLQPEVM	0	0	0	0	0	0	sp|P02666|CASB_BOVIN	93	108
TQTPVVVPPFLQPEVMG	0	0	0	0	0	0	sp|P02666|CASB_BOVIN	93	109
TQTPVVVPPFLQPEVMG	0	0	0	0	0	1	sp|P02666|CASB_BOVIN	93	109
TQTPVVVPPFLQPEVMGVS	0	0	0	0	0	0	sp|P02666|CASB_BOVIN	93	111
TQYTDAPSFSDIPNPIGSEN	0	0	0	0	0	0	sp|P02662|CASA1_BOVIN	186	205
TTPNKTPPGADPK	1	0	0	0	0	0	sp|Q2YDH1|APC10_BOVIN	2	14
TTVDAGKPRASP	0	0	0	0	0	0	sp|G3MWR8|MICA3_BOVIN	1726	1737
TVERDQPLPTP	0	0	0	0	0	0	tr|F1MGJ4|F1MGJ4_BOVIN	649	659
VAPFPEVF	0	0	0	0	0	0	sp|P02662|CASA1_BOVIN	40	47
VAPFPEVFGKEKVNEL	0	0	0	0	0	0	sp|P02662|CASA1_BOVIN	40	55
VDDKHYQKAL	0	0	0	0	0	0	sp|P02663|CASA2_BOVIN	88	97
VDMESTEVFTK	0	0	1	0	0	0	sp|P02663|CASA2_BOVIN	154	164
VDMESTEVFTK	0	0	0	0	0	0	sp|P02663|CASA2_BOVIN	154	164
VEELKPTPE	0	0	0	0	0	0	sp|P02754|LACB_BOVIN	59	67
VEELKPTPEGDLE	0	0	0	0	0	0	sp|P02754|LACB_BOVIN	59	71
VEELKPTPEGDLEI	0	0	0	0	0	0	sp|P02754|LACB_BOVIN	59	72
VEELKPTPEGDLEIL	0	0	0	0	0	0	sp|P02754|LACB_BOVIN	59	73
VEELKPTPEGDLEILL	0	0	0	0	0	0	sp|P02754|LACB_BOVIN	59	74
VEELKPTPEGDLEILLQ	0	0	0	0	0	0	sp|P02754|LACB_BOVIN	59	75
VEELKPTPEGDLEILLQ	0	0	0	0	0	1	sp|P02754|LACB_BOVIN	59	75
VEMVIDGAAGQQLP	0	0	0	0	0	0	tr|F1N757|F1N757_BOVIN	237	250
VENLHLPLP	0	0	0	0	0	0	sp|P02666|CASB_BOVIN	145	153
VENLHLPLPL	0	0	0	0	0	0	sp|P02666|CASB_BOVIN	145	154
VENLHLPLPLLQ	0	0	0	0	0	0	sp|P02666|CASB_BOVIN	145	156
VEPIGPRVK	0	0	0	0	0	0	tr|E1BDA4|E1BDA4_BOVIN	397	405
VEPVEAVGPKGKSGAAPSKKSK	0	0	0	0	0	0	sp|P18493|PARP1_BOVIN	489	510
VGGAGEGVGGAG	0	0	0	0	0	0	tr|F1MRA1|F1MRA1_BOVIN	4	15
VGGAGEGVGGAGE	0	0	0	0	0	0	tr|F1MRA1|F1MRA1_BOVIN	4	16
VKAPGFGD	0	0	0	0	0	0	sp|P31081|CH60_BOVIN	300	307
VLDTDYKKY	0	0	0	0	0	0	sp|P02754|LACB_BOVIN	110	118
VLGPVRGPFP	0	0	0	0	0	0	sp|P02666|CASB_BOVIN	212	221
VLGPVRGPFPI	0	0	0	0	0	0	sp|P02666|CASB_BOVIN	212	222
VLNPWDQVK	0	0	0	0	0	0	sp|P02663|CASA2_BOVIN	120	128
VLPHIAP	0	0	0	0	0	0	tr|G3MYJ9|G3MYJ9_BOVIN	254	260
VLPVPQKAVPYPQRDMPIQAFLLYQEPVLGPVRGPFPIIV	0	0	0	0	0	1	sp|P02666|CASB_BOVIN	185	224
VLSQIAAQRKKAAGLSEQKP	0	0	0	0	0	0	tr|F1MNU9|F1MNU9_BOVIN	657	676
VPEKKELPITVPKSPAF	0	0	0	0	0	0	sp|A6H6Z7|TPX2_BOVIN	430	446
VPGEIVESL	0	0	0	0	0	0	sp|P02666|CASB_BOVIN	23	31
VPGVGVPGVGVPGAVSPAAAAKAAAKAAK	0	0	0	0	0	0	tr|F1N0H9|F1N0H9_BOVIN	377	405
VPITPTLN	0	0	0	0	0	0	sp|P02663|CASA2_BOVIN	132	139
VPITPTLNREQL	0	0	0	0	0	1	sp|P02663|CASA2_BOVIN	132	143
VPLGTQYTDAPSFSDIPNPIGSE	0	0	0	0	0	0	sp|P02662|CASA1_BOVIN	182	204
VPLGTQYTDAPSFSDIPNPIGSEN	0	0	0	0	0	0	sp|P02662|CASA1_BOVIN	182	205
VPLGTQYTDAPSFSDIPNPIGSENSEKTTMPL	0	0	0	0	0	0	sp|P02662|CASA1_BOVIN	182	213
VPLGTQYTDAPSFSDIPNPIGSENSEKTTMPL	0	0	0	0	0	1	sp|P02662|CASA1_BOVIN	182	213
VPLGTQYTDAPSFSDIPNPIGSENSEKTTMPLW	0	0	1	0	0	0	sp|P02662|CASA1_BOVIN	182	214
VPLGTQYTDAPSFSDIPNPIGSENSEKTTMPLW	0	0	0	0	0	0	sp|P02662|CASA1_BOVIN	182	214
VPNSAEER	0	0	0	0	0	0	sp|P02662|CASA1_BOVIN	127	134
VPNSAEERLH	0	0	0	0	0	0	sp|P02662|CASA1_BOVIN	127	136
VPNSAEERLH	0	1	0	0	0	0	sp|P02662|CASA1_BOVIN	127	136
VPNSAEERLH	0	0	0	0	0	1	sp|P02662|CASA1_BOVIN	127	136
VPPFLQPEV	0	0	0	0	0	0	sp|P02666|CASB_BOVIN	99	107
VPPFLQPEV	0	0	0	0	0	1	sp|P02666|CASB_BOVIN	99	107
VPPFLQPEVM	0	0	0	0	0	0	sp|P02666|CASB_BOVIN	99	108
VPPFLQPEVM	0	0	1	0	0	0	sp|P02666|CASB_BOVIN	99	108
VPPFLQPEVM	0	0	0	0	0	1	sp|P02666|CASB_BOVIN	99	108
VPPFLQPEVMG	0	0	0	0	0	0	sp|P02666|CASB_BOVIN	99	109
VPPFLQPEVMG	0	0	1	0	0	0	sp|P02666|CASB_BOVIN	99	109
VPPFLQPEVMGV	0	0	1	0	0	0	sp|P02666|CASB_BOVIN	99	110
VPPFLQPEVMGVS	0	0	1	0	0	0	sp|P02666|CASB_BOVIN	99	111
VPQLEIVPNS	0	0	0	0	0	1	sp|P02662|CASA1_BOVIN	121	130
VPQLEIVPNSA	0	0	0	0	0	1	sp|P02662|CASA1_BOVIN	121	131
VPQLEIVPNSAE	0	0	0	0	0	1	sp|P02662|CASA1_BOVIN	121	132
VPQLEIVPNSAEE	0	0	0	0	0	1	sp|P02662|CASA1_BOVIN	121	133
VPQLEIVPNSAEER	0	0	0	0	0	1	sp|P02662|CASA1_BOVIN	121	134
VPQLEIVPNSAEER	0	0	0	0	0	0	sp|P02662|CASA1_BOVIN	121	134
VPQLEIVPNSAEER	0	1	0	0	0	0	sp|P02662|CASA1_BOVIN	121	134
VPQLEIVPNSAEERL	0	0	0	0	0	1	sp|P02662|CASA1_BOVIN	121	135
VPQLEIVPNSAEERL	0	1	0	0	0	0	sp|P02662|CASA1_BOVIN	121	135
VPQLEIVPNSAEERLH	0	0	0	0	0	1	sp|P02662|CASA1_BOVIN	121	136
VPQLEIVPNSAEERLH	0	1	0	0	0	0	sp|P02662|CASA1_BOVIN	121	136
VPQLEIVPNSAEERLH	0	0	0	0	0	0	sp|P02662|CASA1_BOVIN	121	136
VPQLEIVPNSAEERLHSM	0	1	0	0	0	0	sp|P02662|CASA1_BOVIN	121	138
VPVVPP	0	0	0	0	0	0	tr|F1N757|F1N757_BOVIN	11474	11479
VPYPAASLVSQNQ	0	0	0	0	0	0	tr|E1BC93|E1BC93_BOVIN	471	483
VPYPQRDMP	0	0	1	0	0	0	sp|P02666|CASB_BOVIN	193	201
VPYPQRDMP	0	0	0	0	0	0	sp|P02666|CASB_BOVIN	193	201
VPYPQRDMPI	0	0	0	0	0	0	sp|P02666|CASB_BOVIN	193	202
VPYPQRDMPI	0	0	1	0	0	0	sp|P02666|CASB_BOVIN	193	202
VPYPQRDMPIQ	0	0	1	0	0	0	sp|P02666|CASB_BOVIN	193	203
VPYPQRDMPIQ	0	0	0	0	0	0	sp|P02666|CASB_BOVIN	193	203
VPYPQRDMPIQ	0	0	0	0	0	1	sp|P02666|CASB_BOVIN	193	203
VPYPQRDMPIQA	0	0	1	0	0	0	sp|P02666|CASB_BOVIN	193	204
VPYPQRDMPIQA	0	0	0	0	0	0	sp|P02666|CASB_BOVIN	193	204
VPYPQRDMPIQAFLL	0	0	0	0	0	0	sp|P02666|CASB_BOVIN	193	207
VRTPEVDDEAL	0	0	0	0	0	0	sp|P02754|LACB_BOVIN	139	149
VRTPEVDDEALE	0	0	0	0	0	0	sp|P02754|LACB_BOVIN	139	150
VRTPEVDDEALEKFD	0	0	0	0	0	0	sp|P02754|LACB_BOVIN	139	153
VVPGGP	0	0	0	0	0	0	tr|E1B8U2|E1B8U2_BOVIN	3	8
VVPPFLQPE	0	0	0	0	0	0	sp|P02666|CASB_BOVIN	98	106
VVPPFLQPEVM	0	0	1	0	0	0	sp|P02666|CASB_BOVIN	98	108
VVPPFLQPEVM	0	0	0	0	0	0	sp|P02666|CASB_BOVIN	98	108
VVPPFLQPEVMG	0	0	0	0	0	0	sp|P02666|CASB_BOVIN	98	109
VVPPFLQPEVMGV	0	0	0	0	0	0	sp|P02666|CASB_BOVIN	98	110
VVPPFLQPEVMGVS	0	0	1	0	0	0	sp|P02666|CASB_BOVIN	98	111
VVVPPF	0	0	0	0	0	0	sp|P02666|CASB_BOVIN	97	102
VVVPPFLQPE	0	0	0	0	0	0	sp|P02666|CASB_BOVIN	97	106
VVVPPFLQPEVM	0	0	0	0	0	0	sp|P02666|CASB_BOVIN	97	108
VYPFPGPIP	0	0	0	0	0	0	sp|P02666|CASB_BOVIN	74	82
VYPFPGPIPN	0	0	0	0	0	0	sp|P02666|CASB_BOVIN	74	83
VYVEELKPTPEGDLE	0	0	0	0	0	0	sp|P02754|LACB_BOVIN	57	71
VYVEELKPTPEGDLEIL	0	0	0	0	0	0	sp|P02754|LACB_BOVIN	57	73
VYVEELKPTPEGDLEILL	0	0	0	0	0	0	sp|P02754|LACB_BOVIN	57	74
VYVEELKPTPEGDLEILLQ	0	0	0	0	0	0	sp|P02754|LACB_BOVIN	57	75
WMHQPHQPLPPT	0	0	1	0	0	0	sp|P02666|CASB_BOVIN	158	169
WMHQPHQPLPPT	0	0	0	0	0	0	sp|P02666|CASB_BOVIN	158	169
YKVPQLE	0	0	0	0	0	0	sp|P02662|CASA1_BOVIN	119	125
YKVPQLEIVPN	0	0	0	0	0	0	sp|P02662|CASA1_BOVIN	119	129
YKVPQLEIVPNSAEERLH	0	0	0	0	0	1	sp|P02662|CASA1_BOVIN	119	136
YLGYLEQLLR	0	0	0	0	0	0	sp|P02662|CASA1_BOVIN	106	115
YLKTVYQHQ	0	0	0	0	0	0	sp|P02663|CASA2_BOVIN	194	202
YLYQGPIVLNPWDQVK	0	0	0	0	0	1	sp|P02663|CASA2_BOVIN	113	128
YLYQGPIVLNPWDQVKR	0	0	0	0	0	0	sp|P02663|CASA2_BOVIN	113	129
YPFPGPIP	0	0	0	0	0	0	sp|P02666|CASB_BOVIN	75	82
YPFPGPIPN	0	0	0	0	0	0	sp|P02666|CASB_BOVIN	75	83
YPFPGPIPN	0	0	0	0	0	1	sp|P02666|CASB_BOVIN	75	83
YPFPGPIPNS	0	0	0	0	0	1	sp|P02666|CASB_BOVIN	75	84
YPFPGPIPNSLP	0	0	0	0	0	1	sp|P02666|CASB_BOVIN	75	86
YPFPGPIPNSLPQ	0	0	0	0	0	1	sp|P02666|CASB_BOVIN	75	87
YPQRDMPI	0	0	0	0	0	0	sp|P02666|CASB_BOVIN	195	202
YPQRDMPIQ	0	0	1	0	0	0	sp|P02666|CASB_BOVIN	195	203
YPQRDMPIQ	0	0	0	0	0	0	sp|P02666|CASB_BOVIN	195	203
YPVEPFTE	0	0	0	0	0	0	sp|P02666|CASB_BOVIN	129	136
YPVEPFTES	0	0	0	0	0	0	sp|P02666|CASB_BOVIN	129	137
YPVEPFTESQ	0	0	0	0	0	0	sp|P02666|CASB_BOVIN	129	138
YPVEPFTESQSLTLTDVENLHLPLPLLQS	0	0	0	0	0	0	sp|P02666|CASB_BOVIN	129	157
YPVPPR	0	0	0	0	0	0	tr|A3KN11|A3KN11_BOVIN	321	326
YPVPWEKCP	0	0	0	0	0	0	tr|F1MFB9|F1MFB9_BOVIN	222	230
YQEPVLGPV	0	0	0	0	0	0	sp|P02666|CASB_BOVIN	208	216
YQEPVLGPV	0	0	0	0	0	1	sp|P02666|CASB_BOVIN	208	216
YQEPVLGPVRGP	0	0	0	0	0	0	sp|P02666|CASB_BOVIN	208	219
YQEPVLGPVRGPF	0	0	0	0	0	0	sp|P02666|CASB_BOVIN	208	220
YQEPVLGPVRGPFP	0	0	0	0	0	0	sp|P02666|CASB_BOVIN	208	221
YQEPVLGPVRGPFPI	0	0	0	0	0	0	sp|P02666|CASB_BOVIN	208	222
YQEPVLGPVRGPFPI	0	0	0	0	0	1	sp|P02666|CASB_BOVIN	208	222
YQEPVLGPVRGPFPII	0	0	0	0	0	0	sp|P02666|CASB_BOVIN	208	223
YQEPVLGPVRGPFPII	0	0	0	0	0	1	sp|P02666|CASB_BOVIN	208	223
YQEPVLGPVRGPFPIIV	0	0	0	0	0	0	sp|P02666|CASB_BOVIN	208	224
YQEPVLGPVRGPFPIIV	0	0	0	0	0	1	sp|P02666|CASB_BOVIN	208	224
YQGPIVLNPWDQVK	0	0	0	0	0	0	sp|P02663|CASA2_BOVIN	115	128
YQGPIVLNPWDQVKR	0	0	0	0	0	0	sp|P02663|CASA2_BOVIN	115	129
YQGPIVLNPWDQVKRN	0	0	0	0	0	0	sp|P02663|CASA2_BOVIN	115	130
YRETGRGSPAKAEAAPA	0	0	0	0	0	0	tr|E1BE90|E1BE90_BOVIN	105	121
YSIDSEPGSPLLDDAK	0	0	0	0	0	0	tr|F1ML06|F1ML06_BOVIN	417	432
YTDAPSFSDIPNPIGSE	0	0	0	0	0	0	sp|P02662|CASA1_BOVIN	188	204
YTDAPSFSDIPNPIGSEN	0	0	0	0	0	0	sp|P02662|CASA1_BOVIN	188	205
YTDAPSFSDIPNPIGSEN	0	0	0	0	0	1	sp|P02662|CASA1_BOVIN	188	205
YTDAPSFSDIPNPIGSENS	0	0	0	0	0	0	sp|P02662|CASA1_BOVIN	188	206
YTDAPSFSDIPNPIGSENSE	0	0	0	0	0	0	sp|P02662|CASA1_BOVIN	188	207
YTDAPSFSDIPNPIGSENSEK	0	0	0	0	0	0	sp|P02662|CASA1_BOVIN	188	208
YTDAPSFSDIPNPIGSENSEK	0	0	0	0	0	1	sp|P02662|CASA1_BOVIN	188	208
YTDAPSFSDIPNPIGSENSEKT	0	0	0	0	0	0	sp|P02662|CASA1_BOVIN	188	209
YTDAPSFSDIPNPIGSENSEKTTMP	0	0	1	0	0	0	sp|P02662|CASA1_BOVIN	188	212
YTDAPSFSDIPNPIGSENSEKTTMP	0	0	0	0	0	0	sp|P02662|CASA1_BOVIN	188	212
YTDAPSFSDIPNPIGSENSEKTTMPL	0	0	1	0	0	0	sp|P02662|CASA1_BOVIN	188	213
YTDAPSFSDIPNPIGSENSEKTTMPL	0	0	0	0	0	0	sp|P02662|CASA1_BOVIN	188	213
YTDAPSFSDIPNPIGSENSEKTTMPL	0	0	0	0	0	1	sp|P02662|CASA1_BOVIN	188	213
YTDAPSFSDIPNPIGSENSEKTTMPLW	0	0	0	0	0	0	sp|P02662|CASA1_BOVIN	188	214
YTDAPSFSDIPNPIGSENSEKTTMPLW	0	0	1	0	0	0	sp|P02662|CASA1_BOVIN	188	214
YVEELKPTPEGDLEIL	0	0	0	0	0	0	sp|P02754|LACB_BOVIN	58	73
YVEELKPTPEGDLEILL	0	0	0	0	0	0	sp|P02754|LACB_BOVIN	58	74
YVEELKPTPEGDLEILLQ	0	0	0	0	0	0	sp|P02754|LACB_BOVIN	58	75
YVPLGTQYTDAPSFSDIPNPIGSENSEKTTMPL	0	0	0	0	0	0	sp|P02662|CASA1_BOVIN	181	213
YYVPLGTQ	0	0	0	0	0	0	sp|P02662|CASA1_BOVIN	180	187
YYVPLGTQYTDAPSFSDIPNPIGSENSEKTTMPLW	0	0	0	0	0	1	sp|P02662|CASA1_BOVIN	180	214

## Sheet: Table S4 Stilton all peptides
Table S4. All peptide sequences identified in Stilton blue cheese.
Peptide sequence	Acetylations	Phosphorylations	Oxidations	Dehydrations	Ammonia loss	Deamidation	Protein	Start position	End position
AAEDTQWSRPE	0	0	0	0	0	0	tr|A6QPJ4|A6QPJ4_BOVIN	12	22
AASDISLLDAQSAPL	0	0	0	0	0	0	sp|P02754|LACB_BOVIN	41	55
AASDISLLDAQSAPL	0	0	0	0	0	1	sp|P02754|LACB_BOVIN	41	55
AASDISLLDAQSAPLR	0	0	0	0	0	0	sp|P02754|LACB_BOVIN	41	56
AASDISLLDAQSAPLRV	0	0	0	0	0	0	sp|P02754|LACB_BOVIN	41	57
AASDISLLDAQSAPLRVY	0	0	0	0	0	0	sp|P02754|LACB_BOVIN	41	58
AASDISLLDAQSAPLRVYVEELKPTPEGDL	0	0	0	0	0	1	sp|P02754|LACB_BOVIN	41	70
AASDISLLDAQSAPLRVYVEELKPTPEGDL	0	0	0	0	0	0	sp|P02754|LACB_BOVIN	41	70
AASDISLLDAQSAPLRVYVEELKPTPEGDLEIL	0	0	0	0	0	1	sp|P02754|LACB_BOVIN	41	73
ADDIPGSNETGLFNDETVF	0	0	0	0	0	0	sp|P80457|XDH_BOVIN	637	655
ADELVFFVN	0	0	0	0	0	0	sp|P80457|XDH_BOVIN	3	11
AEDVGDVAFVK	0	0	0	0	0	0	sp|P24627|TRFL_BOVIN	553	563
AEERLHSMKEGIHAQQKEPMIGVNQELAYFYPELFR	0	1	0	0	0	0	sp|P02662|CASA1_BOVIN	131	166
AEILELAGNAARDNK	0	0	0	0	0	0	tr|Q1LZ92|Q1LZ92_BOVIN	58	72
AEYFRDQEGQDVL	0	0	0	0	0	1	sp|P00829|ATPB_BOVIN	290	302
AFLLYQEPVLGPVRGPFP	0	0	0	0	0	0	sp|P02666|CASB_BOVIN	204	221
AFLLYQEPVLGPVRGPFPI	0	0	0	0	0	0	sp|P02666|CASB_BOVIN	204	222
AFLLYQEPVLGPVRGPFPII	0	0	0	0	0	0	sp|P02666|CASB_BOVIN	204	223
AFLLYQEPVLGPVRGPFPIIV	0	0	0	0	0	0	sp|P02666|CASB_BOVIN	204	224
AGVGEFEAGISKNGQTREH	0	0	0	0	0	1	sp|P68103|EF1A1_BOVIN	118	136
AKPAAVRSPAQ	0	0	0	0	0	0	sp|P02668|CASK_BOVIN	83	93
AKPAAVRSPAQILQW	0	0	0	0	0	0	sp|P02668|CASK_BOVIN	83	97
AKYIPIQYVLSRY	0	0	0	0	0	0	sp|P02668|CASK_BOVIN	44	56
AKYIPIQYVLSRYPSY	0	0	0	0	0	0	sp|P02668|CASK_BOVIN	44	59
AKYIPIQYVLSRYPSYGLN	0	0	0	0	0	0	sp|P02668|CASK_BOVIN	44	62
ALDSRGSDPQDKGK	0	0	0	0	0	0	tr|E1BKZ0|E1BKZ0_BOVIN	1714	1727
ALNEINQFY	0	0	0	0	0	0	sp|P02663|CASA2_BOVIN	96	104
ALNEINQFYQKFP	0	0	0	0	0	0	sp|P02663|CASA2_BOVIN	96	108
ALNEINQFYQKFPQ	0	0	0	0	0	1	sp|P02663|CASA2_BOVIN	96	109
ALNEINQFYQKFPQY	0	0	0	0	0	1	sp|P02663|CASA2_BOVIN	96	110
ALNEINQFYQKFPQYL	0	0	0	0	0	0	sp|P02663|CASA2_BOVIN	96	111
ALNENKVLVLDTDYKKY	0	0	0	0	0	0	sp|P02754|LACB_BOVIN	102	118
ALPQYLKTVYQHQ	0	0	0	0	0	0	sp|P02663|CASA2_BOVIN	190	202
ALPQYLKTVYQHQKAMKPWIQPKTKVIPYVRY	0	0	0	0	0	1	sp|P02663|CASA2_BOVIN	190	221
AMAASDISLLDAQSAPLR	0	0	0	0	0	0	sp|P02754|LACB_BOVIN	39	56
AMAASDISLLDAQSAPLRVYVEELKPTPEGDL	0	0	0	0	0	1	sp|P02754|LACB_BOVIN	39	70
AMAASDISLLDAQSAPLRVYVEELKPTPEGDL	0	0	0	0	0	0	sp|P02754|LACB_BOVIN	39	70
AMAASDISLLDAQSAPLRVYVEELKPTPEGDLEIL	0	0	0	0	0	1	sp|P02754|LACB_BOVIN	39	73
AMAASDISLLDAQSAPLRVYVEELKPTPEGDLEILL	0	0	0	0	0	0	sp|P02754|LACB_BOVIN	39	74
AMAASDISLLDAQSAPLRVYVEELKPTPEGDLEILL	0	0	0	0	0	1	sp|P02754|LACB_BOVIN	39	74
AMAPKHKEMPFPKYPVEPF	0	0	0	0	0	0	sp|P02666|CASB_BOVIN	116	134
AMAPKHKEMPFPKYPVEPFTESQ	0	0	0	0	0	0	sp|P02666|CASB_BOVIN	116	138
AMAPKHKEMPFPKYPVEPFTESQ	0	0	2	0	0	0	sp|P02666|CASB_BOVIN	116	138
AMKPWIQPKTKVIPYVRY	0	0	1	0	0	0	sp|P02663|CASA2_BOVIN	204	221
AMKPWIQPKTKVIPYVRY	0	0	0	0	0	0	sp|P02663|CASA2_BOVIN	204	221
APFDVIGPPEPI	0	0	0	0	0	0	tr|E1BHI7|E1BHI7_BOVIN	27	38
APFPEVFG	0	0	0	0	0	0	sp|P02662|CASA1_BOVIN	41	48
APFPEVFGK	0	0	0	0	0	0	sp|P02662|CASA1_BOVIN	41	49
APFPEVFGKE	0	0	0	0	0	0	sp|P02662|CASA1_BOVIN	41	50
APFPEVFGKEK	0	0	0	0	0	0	sp|P02662|CASA1_BOVIN	41	51
APFPEVFGKEKV	0	0	0	0	0	0	sp|P02662|CASA1_BOVIN	41	52
APFPEVFGKEKVN	0	0	0	0	0	0	sp|P02662|CASA1_BOVIN	41	53
APFPEVFGKEKVNE	0	0	0	0	0	0	sp|P02662|CASA1_BOVIN	41	54
APFPEVFGKEKVNEL	0	0	0	0	0	0	sp|P02662|CASA1_BOVIN	41	55
APFPEVFGKEKVNELS	0	0	0	0	0	0	sp|P02662|CASA1_BOVIN	41	56
APFPEVFGKEKVNELSK	0	0	0	0	0	0	sp|P02662|CASA1_BOVIN	41	57
APKHKEMPFPK	0	0	0	0	0	0	sp|P02666|CASB_BOVIN	118	128
APKHKEMPFPKYPVEP	0	0	0	0	0	0	sp|P02666|CASB_BOVIN	118	133
APKHKEMPFPKYPVEPF	0	0	1	0	0	0	sp|P02666|CASB_BOVIN	118	134
APKHKEMPFPKYPVEPF	0	0	0	0	0	0	sp|P02666|CASB_BOVIN	118	134
APKHKEMPFPKYPVEPFTE	0	0	0	0	0	0	sp|P02666|CASB_BOVIN	118	136
APKHKEMPFPKYPVEPFTES	0	0	0	0	0	0	sp|P02666|CASB_BOVIN	118	137
APKHKEMPFPKYPVEPFTESQ	0	0	1	0	0	0	sp|P02666|CASB_BOVIN	118	138
APKHKEMPFPKYPVEPFTESQ	0	0	0	0	0	0	sp|P02666|CASB_BOVIN	118	138
APKHKEMPFPKYPVEPFTESQ	0	0	0	0	0	1	sp|P02666|CASB_BOVIN	118	138
APKHKEMPFPKYPVEPFTESQS	0	0	1	0	0	0	sp|P02666|CASB_BOVIN	118	139
APKHKEMPFPKYPVEPFTESQS	0	0	0	0	0	0	sp|P02666|CASB_BOVIN	118	139
APKHKEMPFPKYPVEPFTESQSL	0	0	0	0	0	0	sp|P02666|CASB_BOVIN	118	140
APKHKEMPFPKYPVEPFTESQSL	0	0	0	0	0	1	sp|P02666|CASB_BOVIN	118	140
APKHKEMPFPKYPVEPFTESQSLTL	0	0	0	0	0	0	sp|P02666|CASB_BOVIN	118	142
APKHKEMPFPKYPVEPFTESQSLTLTDVENLHL	0	0	0	0	0	1	sp|P02666|CASB_BOVIN	118	150
APKHKEMPFPKYPVEPFTESQSLTLTDVENLHL	0	0	0	0	0	0	sp|P02666|CASB_BOVIN	118	150
APKHKEMPFPKYPVEPFTESQSLTLTDVENLHLP	0	0	0	0	0	1	sp|P02666|CASB_BOVIN	118	151
APKHKEMPFPKYPVEPFTESQSLTLTDVENLHLP	0	0	0	0	0	0	sp|P02666|CASB_BOVIN	118	151
APKHKEMPFPKYPVEPFTESQSLTLTDVENLHLPL	0	0	0	0	0	1	sp|P02666|CASB_BOVIN	118	152
APKHKEMPFPKYPVEPFTESQSLTLTDVENLHLPL	0	0	0	0	0	0	sp|P02666|CASB_BOVIN	118	152
APKHKEMPFPKYPVEPFTESQSLTLTDVENLHLPLP	0	0	0	0	0	1	sp|P02666|CASB_BOVIN	118	153
APKHKEMPFPKYPVEPFTESQSLTLTDVENLHLPLP	0	0	0	0	0	0	sp|P02666|CASB_BOVIN	118	153
APKHKEMPFPKYPVEPFTESQSLTLTDVENLHLPLPL	0	0	0	0	0	1	sp|P02666|CASB_BOVIN	118	154
APKHKEMPFPKYPVEPFTESQSLTLTDVENLHLPLPL	0	0	0	0	0	2	sp|P02666|CASB_BOVIN	118	154
APKHKEMPFPKYPVEPFTESQSLTLTDVENLHLPLPL	0	0	0	0	0	0	sp|P02666|CASB_BOVIN	118	154
APKHKEMPFPKYPVEPFTESQSLTLTDVENLHLPLPLLQ	0	0	0	0	0	2	sp|P02666|CASB_BOVIN	118	156
APKHKEMPFPKYPVEPFTESQSLTLTDVENLHLPLPLLQS	0	0	0	0	0	2	sp|P02666|CASB_BOVIN	118	157
APKHKEMPFPKYPVEPFTESQSLTLTDVENLHLPLPLLQS	0	0	0	0	0	1	sp|P02666|CASB_BOVIN	118	157
APKHKEMPFPKYPVEPFTESQSLTLTDVENLHLPLPLLQS	0	0	1	0	0	0	sp|P02666|CASB_BOVIN	118	157
APKHKEMPFPKYPVEPFTESQSLTLTDVENLHLPLPLLQS	0	0	0	0	0	0	sp|P02666|CASB_BOVIN	118	157
APKHKEMPFPKYPVEPFTESQSLTLTDVENLHLPLPLLQSW	0	0	0	0	0	1	sp|P02666|CASB_BOVIN	118	158
APLRVYVEELKPTPEGDL	0	0	0	0	0	0	sp|P02754|LACB_BOVIN	53	70
APLRVYVEELKPTPEGDLEILL	0	0	0	0	0	0	sp|P02754|LACB_BOVIN	53	74
APSFSDIPNPIG	0	0	0	0	0	0	sp|P02662|CASA1_BOVIN	191	202
APSFSDIPNPIGSE	0	0	0	0	0	0	sp|P02662|CASA1_BOVIN	191	204
APSFSDIPNPIGSE	0	0	0	0	0	1	sp|P02662|CASA1_BOVIN	191	204
APSFSDIPNPIGSEN	0	0	0	0	0	0	sp|P02662|CASA1_BOVIN	191	205
APSFSDIPNPIGSEN	0	0	0	0	0	1	sp|P02662|CASA1_BOVIN	191	205
APSFSDIPNPIGSENSE	0	0	0	0	0	0	sp|P02662|CASA1_BOVIN	191	207
APSFSDIPNPIGSENSEK	0	0	0	0	0	0	sp|P02662|CASA1_BOVIN	191	208
APSFSDIPNPIGSENSEK	0	0	0	0	0	1	sp|P02662|CASA1_BOVIN	191	208
APSFSDIPNPIGSENSEKT	0	0	0	0	0	0	sp|P02662|CASA1_BOVIN	191	209
APSFSDIPNPIGSENSEKT	0	0	0	0	0	1	sp|P02662|CASA1_BOVIN	191	209
APSFSDIPNPIGSENSEKTTMP	0	0	0	0	0	0	sp|P02662|CASA1_BOVIN	191	212
APSFSDIPNPIGSENSEKTTMPL	0	0	0	0	0	0	sp|P02662|CASA1_BOVIN	191	213
APSFSDIPNPIGSENSEKTTMPL	0	0	1	0	0	0	sp|P02662|CASA1_BOVIN	191	213
APSFSDIPNPIGSENSEKTTMPL	0	0	0	0	0	1	sp|P02662|CASA1_BOVIN	191	213
APSFSDIPNPIGSENSEKTTMPLW	0	0	1	0	0	0	sp|P02662|CASA1_BOVIN	191	214
APSFSDIPNPIGSENSEKTTMPLW	0	0	0	0	0	0	sp|P02662|CASA1_BOVIN	191	214
APVNVTTEVKSVEMHHEALSEALPGDNVGFNVK	0	0	0	0	0	1	sp|P68103|EF1A1_BOVIN	281	313
AQQKEPMIG	0	0	0	0	0	0	sp|P02662|CASA1_BOVIN	144	152
AQQKEPMIGVN	0	0	0	0	0	0	sp|P02662|CASA1_BOVIN	144	154
AQQKEPMIGVNQ	0	0	0	0	0	0	sp|P02662|CASA1_BOVIN	144	155
AQQKEPMIGVNQE	0	0	0	0	0	0	sp|P02662|CASA1_BOVIN	144	156
AQQKEPMIGVNQE	0	0	1	0	0	0	sp|P02662|CASA1_BOVIN	144	156
AQQKEPMIGVNQEL	0	0	0	0	0	0	sp|P02662|CASA1_BOVIN	144	157
AQQKEPMIGVNQELAY	0	0	0	0	0	0	sp|P02662|CASA1_BOVIN	144	159
AQQKEPMIGVNQELAY	0	0	0	0	0	1	sp|P02662|CASA1_BOVIN	144	159
AQQKEPMIGVNQELAYFYPEL	0	0	0	0	0	0	sp|P02662|CASA1_BOVIN	144	164
AQQKEPMIGVNQELAYFYPELFR	0	0	1	0	0	0	sp|P02662|CASA1_BOVIN	144	166
AQQKEPMIGVNQELAYFYPELFR	0	0	0	0	0	0	sp|P02662|CASA1_BOVIN	144	166
AQQKEPMIGVNQELAYFYPELFR	0	0	0	0	0	1	sp|P02662|CASA1_BOVIN	144	166
AQQKEPMIGVNQELAYFYPELFRQ	0	0	0	0	0	0	sp|P02662|CASA1_BOVIN	144	167
AQSAPLRVYVEELKPTPEGDLEILL	0	0	0	0	0	0	sp|P02754|LACB_BOVIN	50	74
AQYQKDVPDHKE	0	0	0	0	0	0	sp|Q2UVX4|CO3_BOVIN	1279	1290
ASDISLLDAQSAPLR	0	0	0	0	0	0	sp|P02754|LACB_BOVIN	42	56
ASDISLLDAQSAPLRV	0	0	0	0	0	0	sp|P02754|LACB_BOVIN	42	57
ASDISLLDAQSAPLRVYVEELKPTPEGDL	0	0	0	0	0	1	sp|P02754|LACB_BOVIN	42	70
ASDISLLDAQSAPLRVYVEELKPTPEGDLEIL	0	0	0	0	0	1	sp|P02754|LACB_BOVIN	42	73
ASDISLLDAQSAPLRVYVEELKPTPEGDLEILL	0	0	0	0	0	1	sp|P02754|LACB_BOVIN	42	74
ASDISLLDAQSAPLRVYVEELKPTPEGDLEILL	0	0	0	0	0	0	sp|P02754|LACB_BOVIN	42	74
ASDPLEGLGSEGALSP	0	0	0	0	0	0	tr|F1MVK1|F1MVK1_BOVIN	974	989
ATLHAVDVTLDPDTAHP	0	0	0	0	0	0	sp|P18892|BT1A1_BOVIN	298	314
AVDVTLDPDTAHP	0	0	0	0	0	0	sp|P18892|BT1A1_BOVIN	302	314
AVDVTLDPDTAHPH	0	0	0	0	0	0	sp|P18892|BT1A1_BOVIN	302	315
AVDVTLDPDTAHPHL	0	0	0	0	0	0	sp|P18892|BT1A1_BOVIN	302	316
AVFVSREGQEQEGEEM	0	0	0	0	0	0	sp|P18892|BT1A1_BOVIN	73	88
AVFVSREGQEQEGEEMA	0	0	0	0	0	0	sp|P18892|BT1A1_BOVIN	73	89
AVFVSREGQEQEGEEMAEYR	0	0	0	0	0	0	sp|P18892|BT1A1_BOVIN	73	92
AVFVSREGQEQEGEEMAEYRG	0	0	0	0	0	0	sp|P18892|BT1A1_BOVIN	73	93
AVIEYLAAEILELAGNA	0	0	0	0	0	0	tr|Q1LZ92|Q1LZ92_BOVIN	51	67
AVIEYLAAEILELAGNAARD	0	0	0	0	0	0	tr|Q1LZ92|Q1LZ92_BOVIN	51	70
AVIEYLAAEILELAGNAARDNK	0	0	0	0	0	0	tr|Q1LZ92|Q1LZ92_BOVIN	51	72
AVLEYLTAEILELAGNAARD	0	0	0	0	0	0	sp|P0C0S9|H2A1_BOVIN	54	73
AVPFPTMVAL	0	0	1	0	0	0	sp|A5D7E2|TM9S4_BOVIN	443	452
AVPITPTLNR	0	0	0	0	0	0	sp|P02663|CASA2_BOVIN	131	140
AVPYPQRDM	0	0	1	0	0	0	sp|P02666|CASB_BOVIN	192	200
AVPYPQRDMP	0	0	1	0	0	0	sp|P02666|CASB_BOVIN	192	201
AVPYPQRDMP	0	0	0	0	0	0	sp|P02666|CASB_BOVIN	192	201
AVPYPQRDMP	0	0	0	0	0	1	sp|P02666|CASB_BOVIN	192	201
AVPYPQRDMPI	0	0	0	0	0	0	sp|P02666|CASB_BOVIN	192	202
AVPYPQRDMPIQ	0	0	0	0	0	0	sp|P02666|CASB_BOVIN	192	203
AVPYPQRDMPIQ	0	0	1	0	0	0	sp|P02666|CASB_BOVIN	192	203
AVPYPQRDMPIQA	0	0	1	0	0	0	sp|P02666|CASB_BOVIN	192	204
AVPYPQRDMPIQA	0	0	0	0	0	0	sp|P02666|CASB_BOVIN	192	204
AVPYPQRDMPIQA	0	0	0	0	0	1	sp|P02666|CASB_BOVIN	192	204
AVPYPQRDMPIQAF	0	0	1	0	0	0	sp|P02666|CASB_BOVIN	192	205
AVPYPQRDMPIQAF	0	0	0	0	0	0	sp|P02666|CASB_BOVIN	192	205
AVPYPQRDMPIQAF	0	0	0	0	0	1	sp|P02666|CASB_BOVIN	192	205
AVPYPQRDMPIQAFL	0	0	0	0	0	0	sp|P02666|CASB_BOVIN	192	206
AVPYPQRDMPIQAFLL	0	0	0	0	0	0	sp|P02666|CASB_BOVIN	192	207
AVRSPAQILQWQV	0	0	0	0	0	0	sp|P02668|CASK_BOVIN	87	99
AVRSPAQILQWQVLSNTVPAK	0	0	0	0	0	0	sp|P02668|CASK_BOVIN	87	107
AVVADTPEH	0	0	0	0	0	0	sp|P80457|XDH_BOVIN	669	677
AWYYVPLGTQYTDAPSFSDIPNPIGSENSEKTTMPL	0	0	0	0	0	0	sp|P02662|CASA1_BOVIN	178	213
AYFYPELFR	0	0	0	0	0	0	sp|P02662|CASA1_BOVIN	158	166
AYFYPELFRQ	0	0	0	0	0	0	sp|P02662|CASA1_BOVIN	158	167
AYFYPELFRQF	0	0	0	0	0	0	sp|P02662|CASA1_BOVIN	158	168
AYGDDGVTWTEYKDPGASE	0	0	0	0	0	0	sp|Q95114|MFGM_BOVIN	362	380
AYPSGAW	0	0	0	0	0	0	sp|P02662|CASA1_BOVIN	173	179
DAKDISKEIPLSPM	0	0	1	0	0	0	sp|P18892|BT1A1_BOVIN	487	500
DAKDISKEIPLSPM	0	0	0	0	0	0	sp|P18892|BT1A1_BOVIN	487	500
DAKDISKEIPLSPMGEDSASGDIETL	0	0	1	0	0	0	sp|P18892|BT1A1_BOVIN	487	512
DALNENKVLVLDTDYKKY	0	0	0	0	0	0	sp|P02754|LACB_BOVIN	101	118
DAPGHRDFIKN	0	0	0	0	0	0	sp|P68103|EF1A1_BOVIN	91	101
DAPSFSDIPNPIGSE	0	0	0	0	0	0	sp|P02662|CASA1_BOVIN	190	204
DAPSFSDIPNPIGSENSEK	0	0	0	0	0	0	sp|P02662|CASA1_BOVIN	190	208
DAPSFSDIPNPIGSENSEK	0	0	0	0	0	1	sp|P02662|CASA1_BOVIN	190	208
DAPSFSDIPNPIGSENSEKT	0	0	0	0	0	1	sp|P02662|CASA1_BOVIN	190	209
DAPSFSDIPNPIGSENSEKTTMPL	0	0	1	0	0	0	sp|P02662|CASA1_BOVIN	190	213
DAPSFSDIPNPIGSENSEKTTMPLW	0	0	0	0	0	0	sp|P02662|CASA1_BOVIN	190	214
DAQSAPLRVYVEELKPTPEGDLEIL	0	0	0	0	0	0	sp|P02754|LACB_BOVIN	49	73
DAQSAPLRVYVEELKPTPEGDLEILL	0	0	0	0	0	0	sp|P02754|LACB_BOVIN	49	74
DAYPSGAW	0	0	0	0	0	0	sp|P02662|CASA1_BOVIN	172	179
DDDIIPEEDIISRS	0	0	0	0	0	0	sp|Q2UVX4|CO3_BOVIN	750	763
DDGKIGI	0	0	0	0	0	0	sp|P04467|CALB1_BOVIN	69	75
DDKHYQKAL	0	0	0	0	0	0	sp|P02663|CASA2_BOVIN	89	97
DDKHYQKALNEINQ	0	0	0	0	0	0	sp|P02663|CASA2_BOVIN	89	102
DDKHYQKALNEINQF	0	0	0	0	0	0	sp|P02663|CASA2_BOVIN	89	103
DDKHYQKALNEINQFY	0	0	0	0	0	0	sp|P02663|CASA2_BOVIN	89	104
DDKHYQKALNEINQFYQK	0	0	0	0	0	0	sp|P02663|CASA2_BOVIN	89	106
DDKHYQKALNEINQFYQKF	0	0	0	0	0	0	sp|P02663|CASA2_BOVIN	89	107
DDKHYQKALNEINQFYQKFP	0	0	0	0	0	0	sp|P02663|CASA2_BOVIN	89	108
DDKHYQKALNEINQFYQKFP	0	0	0	0	0	1	sp|P02663|CASA2_BOVIN	89	108
DDKHYQKALNEINQFYQKFPQ	0	0	0	0	0	0	sp|P02663|CASA2_BOVIN	89	109
DDKHYQKALNEINQFYQKFPQY	0	0	0	0	0	0	sp|P02663|CASA2_BOVIN	89	110
DELQDKIHPFAQTQ	0	0	0	0	0	0	sp|P02666|CASB_BOVIN	58	71
DELQDKIHPFAQTQS	0	0	0	0	0	0	sp|P02666|CASB_BOVIN	58	72
DENYEEAIVH	0	0	0	0	0	0	sp|P18892|BT1A1_BOVIN	129	138
DENYEEAIVHL	0	0	0	0	0	0	sp|P18892|BT1A1_BOVIN	129	139
DERFFSDKIA	0	0	0	0	0	0	sp|P02668|CASK_BOVIN	35	44
DERFFSDKIAK	0	0	0	0	0	0	sp|P02668|CASK_BOVIN	35	45
DERFFSDKIAKY	0	0	0	0	0	0	sp|P02668|CASK_BOVIN	35	46
DERFFSDKIAKYIP	0	0	0	0	0	0	sp|P02668|CASK_BOVIN	35	48
DERFFSDKIAKYIPI	0	0	0	0	0	0	sp|P02668|CASK_BOVIN	35	49
DERFFSDKIAKYIPIQ	0	0	0	0	0	0	sp|P02668|CASK_BOVIN	35	50
DERFFSDKIAKYIPIQY	0	0	0	0	0	0	sp|P02668|CASK_BOVIN	35	51
DGKEDLIWKL	0	0	0	0	0	0	sp|P24627|TRFL_BOVIN	280	289
DGKEDLIWKLL	0	0	0	0	0	0	sp|P24627|TRFL_BOVIN	280	290
DGKEDLIWKLLSKAQ	0	0	0	0	0	0	sp|P24627|TRFL_BOVIN	280	294
DIPNPIGSE	0	0	0	0	0	0	sp|P02662|CASA1_BOVIN	196	204
DIPNPIGSENSEK	0	0	0	0	0	0	sp|P02662|CASA1_BOVIN	196	208
DIPNPIGSENSEK	0	0	0	0	0	1	sp|P02662|CASA1_BOVIN	196	208
DIPNPIGSENSEKT	0	0	0	0	0	1	sp|P02662|CASA1_BOVIN	196	209
DIPNPIGSENSEKTTMPL	0	0	1	0	0	0	sp|P02662|CASA1_BOVIN	196	213
DIPNPIGSENSEKTTMPL	0	0	0	0	0	1	sp|P02662|CASA1_BOVIN	196	213
DIPNPIGSENSEKTTMPL	0	0	0	0	0	0	sp|P02662|CASA1_BOVIN	196	213
DIPNPIGSENSEKTTMPLW	0	0	0	0	0	1	sp|P02662|CASA1_BOVIN	196	214
DIPTLAPNTANASGLPGVPWAVALAGA	0	0	0	0	0	0	sp|P46626|ADRB3_BOVIN	16	42
DIPTLAPNTANASGLPGVPWAVALAGA	0	0	0	0	0	1	sp|P46626|ADRB3_BOVIN	16	42
DIQKVAGTW	0	0	0	0	0	0	sp|P02754|LACB_BOVIN	27	35
DIQKVAGTWY	0	0	0	0	0	0	sp|P02754|LACB_BOVIN	27	36
DIQKVAGTWYS	0	0	0	0	0	0	sp|P02754|LACB_BOVIN	27	37
DKEGIPPDQQR	0	0	0	0	0	0	sp|P63048|RL40_BOVIN	32	42
DKEGIPPDQQRL	0	0	0	0	0	0	sp|P63048|RL40_BOVIN	32	43
DKFLDDDLTDDIM	0	0	1	0	0	0	sp|P00711|LALBA_BOVIN	97	109
DKFLDDDLTDDIM	0	0	0	0	0	0	sp|P00711|LALBA_BOVIN	97	109
DKHYQKALNE	0	0	0	0	0	0	sp|P02663|CASA2_BOVIN	90	99
DKHYQKALNEIN	0	0	0	0	0	0	sp|P02663|CASA2_BOVIN	90	101
DKHYQKALNEINQ	0	0	0	0	0	0	sp|P02663|CASA2_BOVIN	90	102
DKHYQKALNEINQF	0	0	0	0	0	0	sp|P02663|CASA2_BOVIN	90	103
DKHYQKALNEINQFY	0	0	0	0	0	0	sp|P02663|CASA2_BOVIN	90	104
DKHYQKALNEINQFYQKFP	0	0	0	0	0	0	sp|P02663|CASA2_BOVIN	90	108
DKHYQKALNEINQFYQKFP	0	0	0	0	0	1	sp|P02663|CASA2_BOVIN	90	108
DKIAKYIPIQ	0	0	0	0	0	0	sp|P02668|CASK_BOVIN	41	50
DKIAKYIPIQY	0	0	0	0	0	0	sp|P02668|CASK_BOVIN	41	51
DKIAKYIPIQY	0	0	0	0	0	1	sp|P02668|CASK_BOVIN	41	51
DKIAKYIPIQYV	0	0	0	0	0	0	sp|P02668|CASK_BOVIN	41	52
DKIAKYIPIQYVL	0	0	0	0	0	0	sp|P02668|CASK_BOVIN	41	53
DKIAKYIPIQYVLSRY	0	0	0	0	0	0	sp|P02668|CASK_BOVIN	41	56
DKIAKYIPIQYVLSRYPSY	0	0	0	0	0	0	sp|P02668|CASK_BOVIN	41	59
DKIAKYIPIQYVLSRYPSYG	0	0	0	0	0	0	sp|P02668|CASK_BOVIN	41	60
DKIAKYIPIQYVLSRYPSYGL	0	0	0	0	0	0	sp|P02668|CASK_BOVIN	41	61
DKIAKYIPIQYVLSRYPSYGLN	0	0	0	0	0	1	sp|P02668|CASK_BOVIN	41	62
DKIAKYIPIQYVLSRYPSYGLN	0	0	0	0	0	0	sp|P02668|CASK_BOVIN	41	62
DKIAKYIPIQYVLSRYPSYGLNY	0	0	0	0	0	0	sp|P02668|CASK_BOVIN	41	63
DKIAKYIPIQYVLSRYPSYGLNYY	0	0	0	0	0	1	sp|P02668|CASK_BOVIN	41	64
DKIAKYIPIQYVLSRYPSYGLNYY	0	0	0	0	0	0	sp|P02668|CASK_BOVIN	41	64
DKIAKYIPIQYVLSRYPSYGLNYYQQKPV	0	0	0	0	0	1	sp|P02668|CASK_BOVIN	41	69
DKIAKYIPIQYVLSRYPSYGLNYYQQKPV	0	0	0	0	0	0	sp|P02668|CASK_BOVIN	41	69
DKIAKYIPIQYVLSRYPSYGLNYYQQKPVALIN	0	0	0	0	0	2	sp|P02668|CASK_BOVIN	41	73
DKIAKYIPIQYVLSRYPSYGLNYYQQKPVALINN	0	0	0	0	0	1	sp|P02668|CASK_BOVIN	41	74
DKIAKYIPIQYVLSRYPSYGLNYYQQKPVALINN	0	0	0	0	0	0	sp|P02668|CASK_BOVIN	41	74
DKIHPFAQTQ	0	0	0	0	0	0	sp|P02666|CASB_BOVIN	62	71
DKIHPFAQTQ	0	0	0	0	0	1	sp|P02666|CASB_BOVIN	62	71
DKIHPFAQTQS	0	0	0	0	0	0	sp|P02666|CASB_BOVIN	62	72
DKIHPFAQTQSL	0	0	0	0	0	0	sp|P02666|CASB_BOVIN	62	73
DLPKLVEGL	0	0	0	0	0	0	sp|Q3SYU2|EF2_BOVIN	516	524
DMPIQAFLLYQEPVLGPVRGPFPI	0	0	0	0	0	0	sp|P02666|CASB_BOVIN	199	222
DPDTAHPHL	0	0	0	0	0	0	sp|P18892|BT1A1_BOVIN	308	316
DPMTPENGFW	0	0	1	0	0	0	sp|P18892|BT1A1_BOVIN	385	394
DPPKEELSKS	0	0	0	0	0	0	tr|G3N0V0|G3N0V0_BOVIN	229	238
DPSDRSTLEAAK	0	0	0	0	0	0	tr|E1BPT9|E1BPT9_BOVIN	90	101
DQGPVVPEPVDQGPMV	0	0	0	0	0	0	tr|E1B919|E1B919_BOVIN	592	607
DQPTIDKIFQDL	0	0	0	0	0	0	sp|P79105|S10AC_BOVIN	50	61
DQVKRNAVPITPT	0	0	0	0	0	0	sp|P02663|CASA2_BOVIN	125	137
DQVKRNAVPITPT	0	0	0	0	0	1	sp|P02663|CASA2_BOVIN	125	137
DQVKRNAVPITPTLN	0	0	0	0	0	0	sp|P02663|CASA2_BOVIN	125	139
DQVKRNAVPITPTLNR	0	0	0	0	0	0	sp|P02663|CASA2_BOVIN	125	140
DSPATPEKIR	0	0	0	0	0	0	sp|P80457|XDH_BOVIN	1297	1306
DSPATPEKIRNA	0	0	0	0	0	0	sp|P80457|XDH_BOVIN	1297	1308
DSRQKLPEKPE	0	0	0	0	0	0	sp|P18892|BT1A1_BOVIN	329	339
DTDYKKY	0	0	0	0	0	0	sp|P02754|LACB_BOVIN	112	118
DVAENRYFEMGPP	0	0	1	0	0	0	tr|F1N322|F1N322_BOVIN	613	625
DVENLHLPLP	0	0	0	0	0	0	sp|P02666|CASB_BOVIN	144	153
DVENLHLPLPL	0	0	0	0	0	0	sp|P02666|CASB_BOVIN	144	154
DVENLHLPLPLL	0	0	0	0	0	0	sp|P02666|CASB_BOVIN	144	155
DVENLHLPLPLLQ	0	0	0	0	0	0	sp|P02666|CASB_BOVIN	144	156
DVENLHLPLPLLQS	0	0	0	0	0	0	sp|P02666|CASB_BOVIN	144	157
DVENLHLPLPLLQS	0	0	0	0	0	1	sp|P02666|CASB_BOVIN	144	157
DVENLHLPLPLLQSW	0	0	0	0	0	0	sp|P02666|CASB_BOVIN	144	158
DVENLHLPLPLLQSW	0	0	0	0	0	1	sp|P02666|CASB_BOVIN	144	158
DVENLHLPLPLLQSWMHQPHQPLP	0	0	0	0	0	1	sp|P02666|CASB_BOVIN	144	167
DVENLHLPLPLLQSWMHQPHQPLPPTVM	0	0	1	0	0	0	sp|P02666|CASB_BOVIN	144	171
DVENLHLPLPLLQSWMHQPHQPLPPTVMFPPQ	0	0	0	0	0	1	sp|P02666|CASB_BOVIN	144	175
DVENLHLPLPLLQSWMHQPHQPLPPTVMFPPQS	0	0	2	0	0	0	sp|P02666|CASB_BOVIN	144	176
DVPSERYLGYLE	0	0	0	0	0	0	sp|P02662|CASA1_BOVIN	100	111
DVPSERYLGYLEQ	0	0	0	0	0	0	sp|P02662|CASA1_BOVIN	100	112
DVPSERYLGYLEQL	0	0	0	0	0	0	sp|P02662|CASA1_BOVIN	100	113
DVPSERYLGYLEQLL	0	0	0	0	0	0	sp|P02662|CASA1_BOVIN	100	114
DVPSERYLGYLEQLLR	0	0	0	0	0	0	sp|P02662|CASA1_BOVIN	100	115
DVPSERYLGYLEQLLRL	0	0	0	0	0	0	sp|P02662|CASA1_BOVIN	100	116
DVPSERYLGYLEQLLRLK	0	0	0	0	0	0	sp|P02662|CASA1_BOVIN	100	117
DVPSERYLGYLEQLLRLKKY	0	0	0	0	0	0	sp|P02662|CASA1_BOVIN	100	119
DVPSERYLGYLEQLLRLKKYKVPQ	0	0	0	0	0	1	sp|P02662|CASA1_BOVIN	100	123
DVTLDPDTAHPH	0	0	0	0	0	0	sp|P18892|BT1A1_BOVIN	304	315
DYDIKIWSP	0	0	0	0	0	0	tr|F1MBJ1|F1MBJ1_BOVIN	799	807
EAAGPE	0	0	0	1	0	0	sp|Q3ZBN4|CUED2_BOVIN	134	139
EAAKAAEAAAKAAK	0	0	0	0	0	0	sp|E1BB52|CDK13_BOVIN	476	489
EAEEEAGEGEEAENQVPAD	0	0	0	0	0	0	tr|F1N7G4|F1N7G4_BOVIN	439	457
EAGPVLGAQPLP	0	0	0	0	0	0	tr|F1MXA9|F1MXA9_BOVIN	477	488
EAIDELHRSLESCP	0	0	0	1	0	0	tr|F1N2E8|F1N2E8_BOVIN	545	558
EAMAPKHKEMPFPKYPVEPF	0	0	0	0	0	0	sp|P02666|CASB_BOVIN	115	134
EAMAPKHKEMPFPKYPVEPFTESQ	0	0	0	0	0	0	sp|P02666|CASB_BOVIN	115	138
EAMAPKHKEMPFPKYPVEPFTESQSLTLTDVENLHLPLP	0	0	0	0	0	1	sp|P02666|CASB_BOVIN	115	153
EAMAPKHKEMPFPKYPVEPFTESQSLTLTDVENLHLPLPLLQS	0	0	0	0	0	2	sp|P02666|CASB_BOVIN	115	157
EAMAPKHKEMPFPKYPVEPFTESQSLTLTDVENLHLPLPLLQS	0	0	0	0	0	1	sp|P02666|CASB_BOVIN	115	157
EAPVKVP	0	0	0	0	0	0	tr|G3MZ61|G3MZ61_BOVIN	206	212
EAVHRLDLILC	0	0	0	0	0	0	tr|A4IFN9|A4IFN9_BOVIN	29	39
EDELQDKIHPF	0	0	0	0	0	0	sp|P02666|CASB_BOVIN	57	67
EDELQDKIHPFAQTQ	0	0	0	0	0	0	sp|P02666|CASB_BOVIN	57	71
EDSRQKLPEKPE	0	0	0	0	0	0	sp|P18892|BT1A1_BOVIN	328	339
EDVPSERYLGYLE	0	0	0	0	0	0	sp|P02662|CASA1_BOVIN	99	111
EDVPSERYLGYLEQL	0	0	0	0	0	0	sp|P02662|CASA1_BOVIN	99	113
EDVPSERYLGYLEQLLR	0	0	0	0	0	0	sp|P02662|CASA1_BOVIN	99	115
EDVPSERYLGYLEQLLRL	0	0	0	0	0	0	sp|P02662|CASA1_BOVIN	99	116
EEEDSERSSDGEEAEVEEERRS	0	0	0	0	0	0	tr|F1MT79|F1MT79_BOVIN	11	32
EELKPTPEGDLEI	0	0	0	0	0	0	sp|P02754|LACB_BOVIN	60	72
EELKPTPEGDLEIL	0	0	0	0	0	0	sp|P02754|LACB_BOVIN	60	73
EEPSWAATSLPQQDSH	0	0	0	0	0	0	tr|A0JN59|A0JN59_BOVIN	759	774
EEVEVAPPKAH	0	0	0	0	0	0	sp|Q3ZC42|ADHX_BOVIN	23	33
EEVKITVDDKHY	0	0	0	0	0	0	sp|P02663|CASA2_BOVIN	82	93
EEVPPEEEEVPPEEEEVPPEE	0	0	0	0	0	0	tr|F1N757|F1N757_BOVIN	11077	11097
EGGLPP	0	0	0	1	0	0	sp|Q58DH9|NAGAB_BOVIN	193	198
EGIHAQQKEPM	0	0	0	0	0	0	sp|P02662|CASA1_BOVIN	140	150
EGIHAQQKEPMIG	0	0	0	0	0	0	sp|P02662|CASA1_BOVIN	140	152
EGIHAQQKEPMIGVN	0	0	0	0	0	0	sp|P02662|CASA1_BOVIN	140	154
EGIHAQQKEPMIGVNQ	0	0	0	0	0	0	sp|P02662|CASA1_BOVIN	140	155
EGIHAQQKEPMIGVNQE	0	0	0	0	0	0	sp|P02662|CASA1_BOVIN	140	156
EGIHAQQKEPMIGVNQEL	0	0	0	0	0	0	sp|P02662|CASA1_BOVIN	140	157
EGIHAQQKEPMIGVNQELAYF	0	0	0	0	0	0	sp|P02662|CASA1_BOVIN	140	160
EGIHAQQKEPMIGVNQELAYFYPE	0	0	0	0	0	0	sp|P02662|CASA1_BOVIN	140	163
EGIHAQQKEPMIGVNQELAYFYPEL	0	0	0	0	0	0	sp|P02662|CASA1_BOVIN	140	164
EGIHAQQKEPMIGVNQELAYFYPEL	0	0	0	0	0	1	sp|P02662|CASA1_BOVIN	140	164
EGIHAQQKEPMIGVNQELAYFYPEL	0	0	1	0	0	0	sp|P02662|CASA1_BOVIN	140	164
EGIHAQQKEPMIGVNQELAYFYPELF	0	0	0	0	0	1	sp|P02662|CASA1_BOVIN	140	165
EGIHAQQKEPMIGVNQELAYFYPELF	0	0	0	0	0	0	sp|P02662|CASA1_BOVIN	140	165
EGIHAQQKEPMIGVNQELAYFYPELFR	0	0	0	0	0	0	sp|P02662|CASA1_BOVIN	140	166
EGIHAQQKEPMIGVNQELAYFYPELFR	0	0	0	1	0	1	sp|P02662|CASA1_BOVIN	140	166
EGIHAQQKEPMIGVNQELAYFYPELFR	0	0	0	1	0	0	sp|P02662|CASA1_BOVIN	140	166
EGIHAQQKEPMIGVNQELAYFYPELFRQ	0	0	0	0	0	0	sp|P02662|CASA1_BOVIN	140	167
EGIHAQQKEPMIGVNQELAYFYPELFRQF	0	0	0	0	0	1	sp|P02662|CASA1_BOVIN	140	168
EGNPEVPVH	0	0	0	0	0	0	tr|Q58DP6|Q58DP6_BOVIN	136	144
EGNPEVPVHFDK	0	0	0	0	0	0	tr|Q58DP6|Q58DP6_BOVIN	136	147
EGYVSDDYVGR	0	0	0	0	0	0	sp|P81265|PIGR_BOVIN	71	81
EHKLLSEELEACK	0	0	0	1	0	0	tr|G3MXG2|G3MXG2_BOVIN	36	48
EHVSSSEESIISQE	0	3	0	1	0	0	sp|P02663|CASA2_BOVIN	20	33
EINQFYQK	0	0	0	0	0	0	sp|P02663|CASA2_BOVIN	99	106
EINQFYQKFPQ	0	0	0	0	0	0	sp|P02663|CASA2_BOVIN	99	109
EINQFYQKFPQY	0	0	0	0	0	0	sp|P02663|CASA2_BOVIN	99	110
EIPTTVLNIPHP	0	0	0	0	0	0	sp|Q32S26|BRD2_BOVIN	232	243
EIQEIQAFTGSFVDLISG	0	0	0	0	0	0	tr|F1N6H4|F1N6H4_BOVIN	2507	2524
EIVPNSAEERLH	0	1	0	0	0	0	sp|P02662|CASA1_BOVIN	125	136
EIVPNSAEERLHSM	0	1	0	0	0	0	sp|P02662|CASA1_BOVIN	125	138
EIVPNSAEERLHSMKEGIHAQ	0	1	0	0	0	0	sp|P02662|CASA1_BOVIN	125	145
EKDERFFSDK	0	0	0	0	0	0	sp|P02668|CASK_BOVIN	33	42
EKDERFFSDKIAK	0	0	0	0	0	0	sp|P02668|CASK_BOVIN	33	45
EKDERFFSDKIAKY	0	0	0	0	0	0	sp|P02668|CASK_BOVIN	33	46
EKDERFFSDKIAKYIPI	0	0	0	0	0	0	sp|P02668|CASK_BOVIN	33	49
EKDERFFSDKIAKYIPIQ	0	0	0	0	0	0	sp|P02668|CASK_BOVIN	33	50
EKDERFFSDKIAKYIPIQY	0	0	0	0	0	0	sp|P02668|CASK_BOVIN	33	51
EKFQSEEQQQTE	0	1	0	0	0	0	sp|P02666|CASB_BOVIN	46	57
EKFQSEEQQQTEDELQDKIHPF	0	1	0	0	0	0	sp|P02666|CASB_BOVIN	46	67
EKFQSEEQQQTEDELQDKIHPFAQTQ	0	1	0	0	0	0	sp|P02666|CASB_BOVIN	46	71
EKFYYIDDPDGLKVN	0	0	0	0	0	0	sp|Q2UVX4|CO3_BOVIN	239	253
EKPGPEDKLHGQ	0	0	0	0	0	0	tr|E1BJL8|E1BJL8_BOVIN	39	50
EKSYELPDGQVITIGNE	0	0	0	0	0	0	sp|P60712|ACTB_BOVIN	237	253
ELAYFYPELFR	0	0	0	0	0	0	sp|P02662|CASA1_BOVIN	156	166
ELAYFYPELFR	0	0	0	1	0	0	sp|P02662|CASA1_BOVIN	156	166
ELAYFYPELFRQ	0	0	0	0	0	0	sp|P02662|CASA1_BOVIN	156	167
ELAYFYPELFRQF	0	0	0	0	0	0	sp|P02662|CASA1_BOVIN	156	168
ELDQPPQDDEDPDSPKRVSF	0	0	0	0	0	0	sp|P22226|CTHL1_BOVIN	59	78
ELEIDVDELLDM	0	0	1	0	0	0	tr|G3N0C3|G3N0C3_BOVIN	7	18
ELEQKVQEVLKARAEEAPAQQPPKGQAQVNNGAERR	0	0	0	0	0	0	tr|F1MCP7|F1MCP7_BOVIN	139	174
ELFRQFYQLDAYPSGAWYYVPLGTQYTDAPSFS	0	1	0	0	0	0	sp|P02662|CASA1_BOVIN	163	195
ELQDKIHPF	0	0	0	0	0	0	sp|P02666|CASB_BOVIN	59	67
EMAPDFELDAELR	0	0	0	1	0	0	tr|F1N757|F1N757_BOVIN	21713	21725
EMPFPKYPVEPF	0	0	1	0	0	0	sp|P02666|CASB_BOVIN	123	134
EMPFPKYPVEPF	0	0	0	0	0	0	sp|P02666|CASB_BOVIN	123	134
EMPFPKYPVEPF	0	0	0	1	0	0	sp|P02666|CASB_BOVIN	123	134
EMPFPKYPVEPFTE	0	0	0	0	0	0	sp|P02666|CASB_BOVIN	123	136
EMPFPKYPVEPFTES	0	0	1	0	0	0	sp|P02666|CASB_BOVIN	123	137
EMPFPKYPVEPFTES	0	0	0	0	0	0	sp|P02666|CASB_BOVIN	123	137
EMPFPKYPVEPFTESQ	0	0	1	0	0	0	sp|P02666|CASB_BOVIN	123	138
EMPFPKYPVEPFTESQ	0	0	0	0	0	0	sp|P02666|CASB_BOVIN	123	138
EMPFPKYPVEPFTESQ	0	0	0	1	0	0	sp|P02666|CASB_BOVIN	123	138
EMPFPKYPVEPFTESQS	0	0	0	0	0	0	sp|P02666|CASB_BOVIN	123	139
EMPFPKYPVEPFTESQSL	0	0	0	0	0	0	sp|P02666|CASB_BOVIN	123	140
EMPFPKYPVEPFTESQSLT	0	0	0	0	0	0	sp|P02666|CASB_BOVIN	123	141
EMPFPKYPVEPFTESQSLTL	0	0	0	0	0	0	sp|P02666|CASB_BOVIN	123	142
EMPFPKYPVEPFTESQSLTLTDVENLH	0	0	0	0	0	0	sp|P02666|CASB_BOVIN	123	149
EMPFPKYPVEPFTESQSLTLTDVENLHL	0	0	1	0	0	0	sp|P02666|CASB_BOVIN	123	150
EMPFPKYPVEPFTESQSLTLTDVENLHL	0	0	0	0	0	0	sp|P02666|CASB_BOVIN	123	150
EMPFPKYPVEPFTESQSLTLTDVENLHL	0	0	0	0	0	1	sp|P02666|CASB_BOVIN	123	150
EMPFPKYPVEPFTESQSLTLTDVENLHLP	0	0	1	0	0	0	sp|P02666|CASB_BOVIN	123	151
EMPFPKYPVEPFTESQSLTLTDVENLHLP	0	0	0	0	0	0	sp|P02666|CASB_BOVIN	123	151
EMPFPKYPVEPFTESQSLTLTDVENLHLPL	0	0	0	0	0	0	sp|P02666|CASB_BOVIN	123	152
EMPFPKYPVEPFTESQSLTLTDVENLHLPL	0	0	0	0	0	1	sp|P02666|CASB_BOVIN	123	152
EMPFPKYPVEPFTESQSLTLTDVENLHLPLP	0	0	1	0	0	0	sp|P02666|CASB_BOVIN	123	153
EMPFPKYPVEPFTESQSLTLTDVENLHLPLP	0	0	0	0	0	0	sp|P02666|CASB_BOVIN	123	153
EMPFPKYPVEPFTESQSLTLTDVENLHLPLP	0	0	0	0	0	1	sp|P02666|CASB_BOVIN	123	153
EMPFPKYPVEPFTESQSLTLTDVENLHLPLPL	0	0	0	0	0	0	sp|P02666|CASB_BOVIN	123	154
EMPFPKYPVEPFTESQSLTLTDVENLHLPLPL	0	0	0	0	0	1	sp|P02666|CASB_BOVIN	123	154
EMPFPKYPVEPFTESQSLTLTDVENLHLPLPLL	0	0	0	0	0	1	sp|P02666|CASB_BOVIN	123	155
EMPFPKYPVEPFTESQSLTLTDVENLHLPLPLLQ	0	0	0	0	0	1	sp|P02666|CASB_BOVIN	123	156
EMPFPKYPVEPFTESQSLTLTDVENLHLPLPLLQ	0	0	1	0	0	0	sp|P02666|CASB_BOVIN	123	156
EMPFPKYPVEPFTESQSLTLTDVENLHLPLPLLQS	0	0	1	0	0	0	sp|P02666|CASB_BOVIN	123	157
EMPFPKYPVEPFTESQSLTLTDVENLHLPLPLLQS	0	0	0	0	0	0	sp|P02666|CASB_BOVIN	123	157
EMPFPKYPVEPFTESQSLTLTDVENLHLPLPLLQS	0	0	0	1	0	0	sp|P02666|CASB_BOVIN	123	157
EMPFPKYPVEPFTESQSLTLTDVENLHLPLPLLQS	0	0	0	0	0	1	sp|P02666|CASB_BOVIN	123	157
EMPFPKYPVEPFTESQSLTLTDVENLHLPLPLLQS	0	0	0	0	0	2	sp|P02666|CASB_BOVIN	123	157
EMPFPKYPVEPFTESQSLTLTDVENLHLPLPLLQS	0	0	0	1	0	1	sp|P02666|CASB_BOVIN	123	157
EMPFPKYPVEPFTESQSLTLTDVENLHLPLPLLQSW	0	0	0	0	0	0	sp|P02666|CASB_BOVIN	123	158
ENLHLPLPLLQ	0	0	0	0	0	0	sp|P02666|CASB_BOVIN	146	156
ENLHLPLPLLQS	0	0	0	0	0	0	sp|P02666|CASB_BOVIN	146	157
ENLHLPLPLLQS	0	0	0	1	0	0	sp|P02666|CASB_BOVIN	146	157
ENLHLPLPLLQSW	0	0	0	0	0	0	sp|P02666|CASB_BOVIN	146	158
ENLHLPLPLLQSWMHQPHQPLPPTVMFPPQSVLS	0	0	2	0	0	0	sp|P02666|CASB_BOVIN	146	179
ENLPEKADRDQYEL	0	0	0	0	0	0	sp|P24627|TRFL_BOVIN	235	248
ENLPEKADRDQYELL	0	0	0	0	0	0	sp|P24627|TRFL_BOVIN	235	249
EPAICGISRIWVFS	0	0	0	0	0	0	tr|E1BF75|E1BF75_BOVIN	764	777
EPEPELVYGDL	0	0	0	0	0	0	sp|P81265|PIGR_BOVIN	239	249
EPLLPVDSL	0	0	0	0	0	0	tr|F1MH99|F1MH99_BOVIN	193	201
EPMIGVNQEL	0	0	0	0	0	0	sp|P02662|CASA1_BOVIN	148	157
EPMIGVNQELA	0	0	0	0	0	0	sp|P02662|CASA1_BOVIN	148	158
EPMIGVNQELAY	0	0	0	0	0	0	sp|P02662|CASA1_BOVIN	148	159
EPMIGVNQELAY	0	0	0	0	0	1	sp|P02662|CASA1_BOVIN	148	159
EPMIGVNQELAYF	0	0	0	0	0	0	sp|P02662|CASA1_BOVIN	148	160
EPMIGVNQELAYFY	0	0	0	0	0	0	sp|P02662|CASA1_BOVIN	148	161
EPMIGVNQELAYFYP	0	0	0	0	0	0	sp|P02662|CASA1_BOVIN	148	162
EPMIGVNQELAYFYPE	0	0	1	0	0	0	sp|P02662|CASA1_BOVIN	148	163
EPMIGVNQELAYFYPE	0	0	0	0	0	0	sp|P02662|CASA1_BOVIN	148	163
EPMIGVNQELAYFYPEL	0	0	1	0	0	0	sp|P02662|CASA1_BOVIN	148	164
EPMIGVNQELAYFYPEL	0	0	0	0	0	0	sp|P02662|CASA1_BOVIN	148	164
EPMIGVNQELAYFYPEL	0	0	0	1	0	0	sp|P02662|CASA1_BOVIN	148	164
EPMIGVNQELAYFYPEL	0	0	0	0	0	1	sp|P02662|CASA1_BOVIN	148	164
EPMIGVNQELAYFYPELF	0	0	0	0	0	0	sp|P02662|CASA1_BOVIN	148	165
EPMIGVNQELAYFYPELFR	0	0	1	0	0	0	sp|P02662|CASA1_BOVIN	148	166
EPMIGVNQELAYFYPELFR	0	0	0	0	0	0	sp|P02662|CASA1_BOVIN	148	166
EPMIGVNQELAYFYPELFR	0	0	0	0	0	1	sp|P02662|CASA1_BOVIN	148	166
EPMIGVNQELAYFYPELFRQ	0	0	1	0	0	0	sp|P02662|CASA1_BOVIN	148	167
EPMIGVNQELAYFYPELFRQ	0	0	0	0	0	0	sp|P02662|CASA1_BOVIN	148	167
EPMIGVNQELAYFYPELFRQ	0	0	0	0	0	1	sp|P02662|CASA1_BOVIN	148	167
EPVLGPVR	0	0	0	0	0	0	sp|P02666|CASB_BOVIN	210	217
EPVLGPVR	0	0	0	1	0	0	sp|P02666|CASB_BOVIN	210	217
EPVLGPVRG	0	0	0	0	0	0	sp|P02666|CASB_BOVIN	210	218
EPVLGPVRGP	0	0	0	0	0	0	sp|P02666|CASB_BOVIN	210	219
EPVLGPVRGPF	0	0	0	0	0	0	sp|P02666|CASB_BOVIN	210	220
EPVLGPVRGPFP	0	0	0	0	0	0	sp|P02666|CASB_BOVIN	210	221
EPVLGPVRGPFP	0	0	0	1	0	0	sp|P02666|CASB_BOVIN	210	221
EPVLGPVRGPFPI	0	0	0	0	0	0	sp|P02666|CASB_BOVIN	210	222
EPVLGPVRGPFPI	0	0	0	1	0	0	sp|P02666|CASB_BOVIN	210	222
EPVLGPVRGPFPII	0	0	0	0	0	0	sp|P02666|CASB_BOVIN	210	223
EPVLGPVRGPFPII	0	0	0	1	0	0	sp|P02666|CASB_BOVIN	210	223
EPVLGPVRGPFPIIV	0	0	0	0	0	0	sp|P02666|CASB_BOVIN	210	224
EQLSTSEENSKKTVDMESTEVFTKK	0	3	0	0	0	0	sp|P02663|CASA2_BOVIN	141	165
ERFFSDK	0	0	0	0	0	0	sp|P02668|CASK_BOVIN	36	42
ERFFSDKIAK	0	0	0	0	0	0	sp|P02668|CASK_BOVIN	36	45
ERFFSDKIAKY	0	0	0	0	0	0	sp|P02668|CASK_BOVIN	36	46
ERFFSDKIAKYIP	0	0	0	0	0	0	sp|P02668|CASK_BOVIN	36	48
ERFFSDKIAKYIPI	0	0	0	0	0	0	sp|P02668|CASK_BOVIN	36	49
ERFFSDKIAKYIPIQ	0	0	0	0	0	0	sp|P02668|CASK_BOVIN	36	50
ERFFSDKIAKYIPIQY	0	0	0	0	0	0	sp|P02668|CASK_BOVIN	36	51
ERFFSDKIAKYIPIQYVLSRY	0	0	0	0	0	0	sp|P02668|CASK_BOVIN	36	56
ESDFKNTVSFICH	0	0	0	0	0	0	tr|G5E649|G5E649_BOVIN	627	639
ESQSLTLTDVENLHLPLP	0	0	0	0	0	0	sp|P02666|CASB_BOVIN	136	153
ESQSLTLTDVENLHLPLPL	0	0	0	0	0	0	sp|P02666|CASB_BOVIN	136	154
ESQSLTLTDVENLHLPLPLLQS	0	0	0	0	0	0	sp|P02666|CASB_BOVIN	136	157
ESQSLTLTDVENLHLPLPLLQSW	0	0	0	0	0	0	sp|P02666|CASB_BOVIN	136	158
ESRGLIKEQYEGRL	0	0	0	0	0	0	sp|P81265|PIGR_BOVIN	399	412
ETAGGPASFPRDPGSLDDVAMG	0	0	1	1	0	0	tr|E1BM39|E1BM39_BOVIN	92	113
EVEPSDTIENVK	0	0	0	0	0	0	sp|P63048|RL40_BOVIN	16	27
EVEVAPPKAH	0	0	0	0	0	0	sp|Q3ZC42|ADHX_BOVIN	24	33
EVFGKEKVNE	0	0	0	0	0	0	sp|P02662|CASA1_BOVIN	45	54
EVGVVTEPEC	0	0	0	0	0	0	tr|F1N312|F1N312_BOVIN	358	367
EVKITVDDKHY	0	0	0	0	0	0	sp|P02663|CASA2_BOVIN	83	93
EVKITVDDKHYQ	0	0	0	0	0	0	sp|P02663|CASA2_BOVIN	83	94
EVKITVDDKHYQK	0	0	0	0	0	0	sp|P02663|CASA2_BOVIN	83	95
EVKITVDDKHYQKA	0	0	0	0	0	0	sp|P02663|CASA2_BOVIN	83	96
EVKITVDDKHYQKAL	0	0	0	0	0	0	sp|P02663|CASA2_BOVIN	83	97
EVKITVDDKHYQKALNEINQFYQKFPQY	0	0	0	0	0	1	sp|P02663|CASA2_BOVIN	83	110
EVLKINADVAGRPLPIISWAKDGVEIEERA	0	0	0	1	0	1	tr|F1N757|F1N757_BOVIN	26747	26776
EVMGVSKVK	0	0	0	0	0	0	sp|P02666|CASB_BOVIN	106	114
EVMGVSKVKE	0	0	0	0	0	0	sp|P02666|CASB_BOVIN	106	115
EVTSVEGRSVSIK	0	0	0	0	0	0	sp|P81265|PIGR_BOVIN	27	39
FAADFGKSPI	0	0	0	0	0	0	tr|F1N6H1|F1N6H1_BOVIN	4482	4491
FALPQYLKTVYQ	0	0	0	0	0	0	sp|P02663|CASA2_BOVIN	189	200
FALPQYLKTVYQHQ	0	0	0	0	0	0	sp|P02663|CASA2_BOVIN	189	202
FDESFITPR	0	0	0	0	0	0	sp|P10152|ANG1_BOVIN	139	147
FFSDKIAKYIPIQYVLSRY	0	0	0	0	0	0	sp|P02668|CASK_BOVIN	38	56
FGKEKVNE	0	0	0	0	0	0	sp|P02662|CASA1_BOVIN	47	54
FGSFAQHGAW	0	0	0	0	0	0	sp|F1MT22|LGR5_BOVIN	621	630
FKWFMEEIAYDITSHYPLPPKNVDWGEIRG	0	2	0	0	0	0	tr|F1N4Q3|F1N4Q3_BOVIN	505	534
FLLYQEPVLGPVRGPFP	0	0	0	0	0	0	sp|P02666|CASB_BOVIN	205	221
FLLYQEPVLGPVRGPFPI	0	0	0	0	0	0	sp|P02666|CASB_BOVIN	205	222
FLLYQEPVLGPVRGPFPII	0	0	0	0	0	0	sp|P02666|CASB_BOVIN	205	223
FLLYQEPVLGPVRGPFPIIV	0	0	0	0	0	0	sp|P02666|CASB_BOVIN	205	224
FLPYPYYAKPAA	0	0	0	0	0	0	sp|P02668|CASK_BOVIN	76	87
FLPYPYYAKPAAVR	0	0	0	0	0	0	sp|P02668|CASK_BOVIN	76	89
FLPYPYYAKPAAVRSPA	0	0	0	0	0	0	sp|P02668|CASK_BOVIN	76	92
FPEVFGKE	0	0	0	0	0	0	sp|P02662|CASA1_BOVIN	43	50
FPEVFGKEK	0	0	0	0	0	0	sp|P02662|CASA1_BOVIN	43	51
FPEVFGKEKV	0	0	0	0	0	0	sp|P02662|CASA1_BOVIN	43	52
FPEVFGKEKVN	0	0	0	0	0	0	sp|P02662|CASA1_BOVIN	43	53
FPEVFGKEKVNE	0	0	0	0	0	0	sp|P02662|CASA1_BOVIN	43	54
FPEVFGKEKVNEL	0	0	0	0	0	0	sp|P02662|CASA1_BOVIN	43	55
FPGHGGLP	0	0	0	0	0	0	tr|F1N5D4|F1N5D4_BOVIN	187	194
FPGPIPNSLPQNIPPLTQTP	0	0	0	0	0	0	sp|P02666|CASB_BOVIN	77	96
FPGPIPNSLPQNIPPLTQTPVVVPPF	0	0	0	0	0	0	sp|P02666|CASB_BOVIN	77	102
FPKYPVEPF	0	0	0	0	0	0	sp|P02666|CASB_BOVIN	126	134
FPKYPVEPFTE	0	0	0	0	0	0	sp|P02666|CASB_BOVIN	126	136
FPKYPVEPFTES	0	0	0	0	0	0	sp|P02666|CASB_BOVIN	126	137
FPKYPVEPFTESQ	0	0	0	0	0	0	sp|P02666|CASB_BOVIN	126	138
FPKYPVEPFTESQSL	0	0	0	0	0	0	sp|P02666|CASB_BOVIN	126	140
FPKYPVEPFTESQSLTLTDVENLHLPLP	0	0	0	0	0	0	sp|P02666|CASB_BOVIN	126	153
FPKYPVEPFTESQSLTLTDVENLHLPLP	0	0	0	0	0	1	sp|P02666|CASB_BOVIN	126	153
FPKYPVEPFTESQSLTLTDVENLHLPLPL	0	0	0	0	0	0	sp|P02666|CASB_BOVIN	126	154
FPKYPVEPFTESQSLTLTDVENLHLPLPLLQS	0	0	0	0	0	0	sp|P02666|CASB_BOVIN	126	157
FPPQSVLS	0	0	0	0	0	0	sp|P02666|CASB_BOVIN	172	179
FPPQSVLSLS	0	0	0	0	0	0	sp|P02666|CASB_BOVIN	172	181
FPPQSVLSLSQ	0	0	0	0	0	0	sp|P02666|CASB_BOVIN	172	182
FPPQSVLSLSQS	0	0	0	0	0	0	sp|P02666|CASB_BOVIN	172	183
FPPQSVLSLSQSK	0	0	0	0	0	0	sp|P02666|CASB_BOVIN	172	184
FPPQSVLSLSQSKVLPVPQK	0	0	0	0	0	1	sp|P02666|CASB_BOVIN	172	191
FPPQSVLSLSQSKVLPVPQK	0	0	0	0	0	0	sp|P02666|CASB_BOVIN	172	191
FPPQSVLSLSQSKVLPVPQKAVPYPQRD	0	0	0	0	0	1	sp|P02666|CASB_BOVIN	172	199
FPPQSVLSLSQSKVLPVPQKAVPYPQRDMPIQA	0	0	0	0	0	1	sp|P02666|CASB_BOVIN	172	204
FPPQSVLSLSQSKVLPVPQKAVPYPQRDMPIQAF	0	0	0	0	0	1	sp|P02666|CASB_BOVIN	172	205
FQSEEQQQTEDELQDKIHPF	0	1	0	0	0	0	sp|P02666|CASB_BOVIN	48	67
FSDIPNPIGSE	0	0	0	0	0	0	sp|P02662|CASA1_BOVIN	194	204
FSDIPNPIGSENSEKTTMPL	0	0	0	0	0	0	sp|P02662|CASA1_BOVIN	194	213
FSDKIAKY	0	0	0	0	0	0	sp|P02668|CASK_BOVIN	39	46
FSDKIAKYIPIQYVLSRY	0	0	0	0	0	0	sp|P02668|CASK_BOVIN	39	56
FSVAAGPSRPSCPAVSE	0	0	0	0	0	0	tr|A6QPE8|A6QPE8_BOVIN	141	157
FYPELFR	0	0	0	0	0	0	sp|P02662|CASA1_BOVIN	160	166
FYPELFRQ	0	0	0	0	0	0	sp|P02662|CASA1_BOVIN	160	167
FYQLDAYPSGA	0	0	0	0	0	0	sp|P02662|CASA1_BOVIN	168	178
FYQLDAYPSGAW	0	0	0	0	0	0	sp|P02662|CASA1_BOVIN	168	179
FYQLDAYPSGAWY	0	0	0	0	0	0	sp|P02662|CASA1_BOVIN	168	180
FYQLDAYPSGAWYYVPLGTQYTDAPSFSDIPNPIGSE	0	1	0	0	0	0	sp|P02662|CASA1_BOVIN	168	204
GCLAPHSAGSMTSP	0	0	0	0	0	0	tr|F1MK59|F1MK59_BOVIN	12	25
GDGGTGKTTFVKR	0	0	0	0	0	0	sp|Q3T054|RAN_BOVIN	17	29
GDTHLGGEDFDQR	0	0	0	0	0	0	sp|Q0VCX2|GRP78_BOVIN	250	262
GEDSASGDIETLH	0	0	0	0	0	0	sp|P18892|BT1A1_BOVIN	501	513
GEEHFKGL	0	0	0	0	0	0	sp|P02769|ALBU_BOVIN	39	46
GELSPEGAQGLPTSPSP	0	0	0	0	0	0	tr|E1B808|E1B808_BOVIN	505	521
GGGASLELLEGK	0	0	0	0	0	0	sp|Q3T0P6|PGK1_BOVIN	395	406
GGLPPL	0	0	0	0	0	0	sp|P03892|NU2M_BOVIN	252	257
GGNFPK	0	0	0	0	0	0	tr|F1MKP9|F1MKP9_BOVIN	697	702
GGPPGQFHDNANGGQNGTVQEIM	0	0	1	0	0	0	tr|F1MHR6|F1MHR6_BOVIN	178	200
GGPQGDAGLT	0	0	0	0	0	0	tr|A7E3T7|A7E3T7_BOVIN	253	262
GGPQGDAGLTGR	0	0	0	0	0	0	tr|A7E3T7|A7E3T7_BOVIN	253	264
GHEGAGIVESVGEGVT	0	0	0	0	0	0	sp|Q3ZC42|ADHX_BOVIN	66	81
GHVDSGKSTTTGHL	0	0	0	0	0	0	sp|P68103|EF1A1_BOVIN	14	27
GIHAQQKEPM	0	0	0	0	0	0	sp|P02662|CASA1_BOVIN	141	150
GIHAQQKEPMIG	0	0	0	0	0	0	sp|P02662|CASA1_BOVIN	141	152
GIHAQQKEPMIGVN	0	0	0	0	0	0	sp|P02662|CASA1_BOVIN	141	154
GIHAQQKEPMIGVNQ	0	0	0	0	0	0	sp|P02662|CASA1_BOVIN	141	155
GIHAQQKEPMIGVNQE	0	0	1	0	0	0	sp|P02662|CASA1_BOVIN	141	156
GIHAQQKEPMIGVNQE	0	0	0	0	0	0	sp|P02662|CASA1_BOVIN	141	156
GIHAQQKEPMIGVNQE	0	0	0	0	0	1	sp|P02662|CASA1_BOVIN	141	156
GIHAQQKEPMIGVNQEL	0	0	1	0	0	0	sp|P02662|CASA1_BOVIN	141	157
GIHAQQKEPMIGVNQEL	0	0	0	0	0	0	sp|P02662|CASA1_BOVIN	141	157
GIHAQQKEPMIGVNQEL	0	0	0	0	0	1	sp|P02662|CASA1_BOVIN	141	157
GIHAQQKEPMIGVNQELA	0	0	0	0	0	0	sp|P02662|CASA1_BOVIN	141	158
GIHAQQKEPMIGVNQELA	0	0	0	0	0	1	sp|P02662|CASA1_BOVIN	141	158
GIHAQQKEPMIGVNQELAY	0	0	1	0	0	0	sp|P02662|CASA1_BOVIN	141	159
GIHAQQKEPMIGVNQELAY	0	0	0	0	0	1	sp|P02662|CASA1_BOVIN	141	159
GIHAQQKEPMIGVNQELAY	0	0	0	0	0	0	sp|P02662|CASA1_BOVIN	141	159
GIHAQQKEPMIGVNQELAYFYPE	0	0	0	0	0	0	sp|P02662|CASA1_BOVIN	141	163
GIHAQQKEPMIGVNQELAYFYPEL	0	0	0	0	0	0	sp|P02662|CASA1_BOVIN	141	164
GIHAQQKEPMIGVNQELAYFYPEL	0	0	0	0	0	1	sp|P02662|CASA1_BOVIN	141	164
GIHAQQKEPMIGVNQELAYFYPEL	0	0	1	0	0	0	sp|P02662|CASA1_BOVIN	141	164
GIHAQQKEPMIGVNQELAYFYPELF	0	0	0	0	0	0	sp|P02662|CASA1_BOVIN	141	165
GIHAQQKEPMIGVNQELAYFYPELFR	0	0	1	0	0	0	sp|P02662|CASA1_BOVIN	141	166
GIHAQQKEPMIGVNQELAYFYPELFR	0	0	0	0	0	1	sp|P02662|CASA1_BOVIN	141	166
GIHAQQKEPMIGVNQELAYFYPELFR	0	0	0	0	0	0	sp|P02662|CASA1_BOVIN	141	166
GIHAQQKEPMIGVNQELAYFYPELFR	0	0	0	0	0	2	sp|P02662|CASA1_BOVIN	141	166
GIHAQQKEPMIGVNQELAYFYPELFRQ	0	0	0	0	0	1	sp|P02662|CASA1_BOVIN	141	167
GIHAQQKEPMIGVNQELAYFYPELFRQ	0	0	0	0	0	0	sp|P02662|CASA1_BOVIN	141	167
GISEETTTGVH	0	0	0	0	0	0	sp|Q3MHL4|SAHH_BOVIN	152	162
GKEDLIWKL	0	0	0	0	0	0	sp|P24627|TRFL_BOVIN	281	289
GLDIQKVAGTW	0	0	0	0	0	0	sp|P02754|LACB_BOVIN	25	35
GLDIQKVAGTWYS	0	0	0	0	0	0	sp|P02754|LACB_BOVIN	25	37
GLHEVEVKA	0	0	0	0	0	0	sp|Q2UVX4|CO3_BOVIN	905	913
GLNYYQQKPV	0	0	0	0	0	0	sp|P02668|CASK_BOVIN	60	69
GLNYYQQKPVA	0	0	0	0	0	0	sp|P02668|CASK_BOVIN	60	70
GLNYYQQKPVALINN	0	0	0	0	0	0	sp|P02668|CASK_BOVIN	60	74
GLPQEVLNENLLRF	0	0	0	0	0	0	sp|P02662|CASA1_BOVIN	25	38
GNPEVPVH	0	0	0	0	0	0	tr|Q58DP6|Q58DP6_BOVIN	137	144
GPGGPAGGGPGGA	0	0	0	0	0	0	tr|F1MR40|F1MR40_BOVIN	34	46
GPIVLNPW	0	0	0	0	0	0	sp|P02663|CASA2_BOVIN	117	124
GPIVLNPWD	0	0	0	0	0	0	sp|P02663|CASA2_BOVIN	117	125
GPIVLNPWDQ	0	0	0	0	0	0	sp|P02663|CASA2_BOVIN	117	126
GPIVLNPWDQV	0	0	0	0	0	0	sp|P02663|CASA2_BOVIN	117	127
GPIVLNPWDQVK	0	0	0	0	0	0	sp|P02663|CASA2_BOVIN	117	128
GPIVLNPWDQVK	0	0	0	0	0	1	sp|P02663|CASA2_BOVIN	117	128
GPIVLNPWDQVKR	0	0	0	0	0	0	sp|P02663|CASA2_BOVIN	117	129
GPIVLNPWDQVKR	0	0	0	0	0	1	sp|P02663|CASA2_BOVIN	117	129
GPIVLNPWDQVKRN	0	0	0	0	0	0	sp|P02663|CASA2_BOVIN	117	130
GPIVLNPWDQVKRN	0	0	0	0	0	1	sp|P02663|CASA2_BOVIN	117	130
GPIVLNPWDQVKRNA	0	0	0	0	0	0	sp|P02663|CASA2_BOVIN	117	131
GPREDSTRIG	0	0	0	0	0	0	sp|Q5E988|RS5_BOVIN	120	129
GPVRGPFP	0	0	0	0	0	0	sp|P02666|CASB_BOVIN	214	221
GPVRGPFPI	0	0	0	0	0	0	sp|P02666|CASB_BOVIN	214	222
GQKDSYVGDEAQSK	0	0	0	0	0	0	sp|P62739|ACTA_BOVIN	50	63
GQKDSYVGDEAQSKR	0	0	0	0	0	0	sp|P60712|ACTB_BOVIN	48	62
GQKDSYVGDEAQSKRGILT	0	0	0	0	0	0	sp|P60712|ACTB_BOVIN	48	66
GQMNEPPGARAR	0	0	0	0	0	0	sp|P00829|ATPB_BOVIN	270	281
GQNPTEAELQDMINEVDAD	0	0	0	0	0	2	sp|P62157|CALM_BOVIN	41	59
GQPEAPWPLPG	0	0	0	0	0	1	tr|F1N0Y1|F1N0Y1_BOVIN	587	597
GRPTYEEYLGT	0	0	0	0	0	0	sp|P24627|TRFL_BOVIN	672	682
GTQYTDAPSFS	0	0	0	0	0	0	sp|P02662|CASA1_BOVIN	185	195
GTQYTDAPSFS	0	0	0	0	0	1	sp|P02662|CASA1_BOVIN	185	195
GTQYTDAPSFSD	0	0	0	0	0	0	sp|P02662|CASA1_BOVIN	185	196
GTQYTDAPSFSDIPNPIG	0	0	0	0	0	0	sp|P02662|CASA1_BOVIN	185	202
GTQYTDAPSFSDIPNPIGS	0	0	0	0	0	0	sp|P02662|CASA1_BOVIN	185	203
GTQYTDAPSFSDIPNPIGSE	0	0	0	0	0	0	sp|P02662|CASA1_BOVIN	185	204
GTQYTDAPSFSDIPNPIGSE	0	0	0	0	0	1	sp|P02662|CASA1_BOVIN	185	204
GTQYTDAPSFSDIPNPIGSEN	0	0	0	0	0	0	sp|P02662|CASA1_BOVIN	185	205
GTQYTDAPSFSDIPNPIGSENSE	0	0	0	0	0	1	sp|P02662|CASA1_BOVIN	185	207
GTQYTDAPSFSDIPNPIGSENSE	0	0	0	0	0	0	sp|P02662|CASA1_BOVIN	185	207
GTQYTDAPSFSDIPNPIGSENSEK	0	0	0	0	0	0	sp|P02662|CASA1_BOVIN	185	208
GTQYTDAPSFSDIPNPIGSENSEK	0	0	0	0	0	1	sp|P02662|CASA1_BOVIN	185	208
GTQYTDAPSFSDIPNPIGSENSEKT	0	0	0	0	0	0	sp|P02662|CASA1_BOVIN	185	209
GTQYTDAPSFSDIPNPIGSENSEKT	0	0	0	0	0	1	sp|P02662|CASA1_BOVIN	185	209
GTQYTDAPSFSDIPNPIGSENSEKTTMPL	0	0	0	0	0	1	sp|P02662|CASA1_BOVIN	185	213
GTQYTDAPSFSDIPNPIGSENSEKTTMPL	0	0	0	0	0	0	sp|P02662|CASA1_BOVIN	185	213
GTQYTDAPSFSDIPNPIGSENSEKTTMPL	0	0	1	0	0	0	sp|P02662|CASA1_BOVIN	185	213
GTQYTDAPSFSDIPNPIGSENSEKTTMPLW	0	0	0	0	0	0	sp|P02662|CASA1_BOVIN	185	214
GTQYTDAPSFSDIPNPIGSENSEKTTMPLW	0	0	0	0	0	1	sp|P02662|CASA1_BOVIN	185	214
GTTGFINQKGIDYY	0	0	0	0	0	0	tr|F1MNT6|F1MNT6_BOVIN	94	107
GVEFDETTADDRKVK	0	0	0	0	0	0	sp|P10790|FABPH_BOVIN	68	82
GVKEGPRYGET	0	0	0	0	0	0	sp|P81265|PIGR_BOVIN	544	554
GVKEGPRYGETA	0	0	0	0	0	0	sp|P81265|PIGR_BOVIN	544	555
GVNQELAYFYPE	0	0	0	0	0	0	sp|P02662|CASA1_BOVIN	152	163
GVNQELAYFYPEL	0	0	0	0	0	0	sp|P02662|CASA1_BOVIN	152	164
GVNQELAYFYPEL	0	0	0	0	0	1	sp|P02662|CASA1_BOVIN	152	164
GVNQELAYFYPELFR	0	0	0	0	0	1	sp|P02662|CASA1_BOVIN	152	166
GVNQELAYFYPELFR	0	0	0	0	0	0	sp|P02662|CASA1_BOVIN	152	166
GVNQELAYFYPELFRQ	0	0	0	0	0	0	sp|P02662|CASA1_BOVIN	152	167
GVNQELAYFYPELFRQF	0	0	0	0	0	1	sp|P02662|CASA1_BOVIN	152	168
GVNQELAYFYPELFRQF	0	0	0	0	0	0	sp|P02662|CASA1_BOVIN	152	168
GVSKVKEAM	0	0	0	0	0	0	sp|P02666|CASB_BOVIN	109	117
GVSKVKEAMAPK	0	0	0	0	0	0	sp|P02666|CASB_BOVIN	109	120
GVSKVKEAMAPKH	0	0	0	0	0	0	sp|P02666|CASB_BOVIN	109	121
GVSKVKEAMAPKHK	0	0	0	0	0	0	sp|P02666|CASB_BOVIN	109	122
GVSKVKEAMAPKHKE	0	0	0	0	0	0	sp|P02666|CASB_BOVIN	109	123
GVVDSEDLPL	0	0	0	0	0	0	sp|Q76LV2|HS90A_BOVIN	388	397
GVVDSEDLPLNI	0	0	0	0	0	0	sp|Q76LV2|HS90A_BOVIN	388	399
GYIDRMDDTYAV	0	0	0	0	0	0	tr|E1BDG0|E1BDG0_BOVIN	105	116
GYLEQLLR	0	0	0	0	0	0	sp|P02662|CASA1_BOVIN	108	115
GYLEQLLRLK	0	0	0	0	0	0	sp|P02662|CASA1_BOVIN	108	117
HAQQKEPMIG	0	0	0	0	0	0	sp|P02662|CASA1_BOVIN	143	152
HAQQKEPMIGVN	0	0	0	0	0	0	sp|P02662|CASA1_BOVIN	143	154
HAQQKEPMIGVNQE	0	0	0	0	0	0	sp|P02662|CASA1_BOVIN	143	156
HAQQKEPMIGVNQEL	0	0	0	0	0	0	sp|P02662|CASA1_BOVIN	143	157
HAQQKEPMIGVNQELAYFYPEL	0	0	0	0	0	0	sp|P02662|CASA1_BOVIN	143	164
HAQQKEPMIGVNQELAYFYPELFR	0	0	0	0	0	0	sp|P02662|CASA1_BOVIN	143	166
HAQQKEPMIGVNQELAYFYPELFRQ	0	0	0	0	0	0	sp|P02662|CASA1_BOVIN	143	167
HAQQKEPMIGVNQELAYFYPELFRQ	0	0	0	0	0	2	sp|P02662|CASA1_BOVIN	143	167
HEGAGIVESVGEGVT	0	0	0	0	0	0	sp|Q3ZC42|ADHX_BOVIN	67	81
HEGGVDVGDVDAK	0	0	0	0	0	0	sp|Q32PF2|ACLY_BOVIN	136	148
HGSPELAEPIESL	0	0	0	0	0	0	sp|P26201|CD36_BOVIN	348	360
HIQKEDVPSE	0	0	0	0	0	0	sp|P02662|CASA1_BOVIN	95	104
HIQKEDVPSER	0	0	0	0	0	0	sp|P02662|CASA1_BOVIN	95	105
HIQKEDVPSERY	0	0	0	0	0	0	sp|P02662|CASA1_BOVIN	95	106
HIQKEDVPSERYL	0	0	0	0	0	0	sp|P02662|CASA1_BOVIN	95	107
HIQKEDVPSERYLGY	0	0	0	0	0	0	sp|P02662|CASA1_BOVIN	95	109
HIQKEDVPSERYLGYLEQL	0	0	0	0	0	0	sp|P02662|CASA1_BOVIN	95	113
HIQKEDVPSERYLGYLEQLLR	0	0	0	0	0	0	sp|P02662|CASA1_BOVIN	95	115
HKEMPFPK	0	0	0	0	0	0	sp|P02666|CASB_BOVIN	121	128
HKEMPFPKYPVEP	0	0	0	0	0	0	sp|P02666|CASB_BOVIN	121	133
HKEMPFPKYPVEPF	0	0	0	0	0	0	sp|P02666|CASB_BOVIN	121	134
HKEMPFPKYPVEPF	0	0	1	0	0	0	sp|P02666|CASB_BOVIN	121	134
HKEMPFPKYPVEPFTE	0	0	0	0	0	0	sp|P02666|CASB_BOVIN	121	136
HKEMPFPKYPVEPFTES	0	0	0	0	0	0	sp|P02666|CASB_BOVIN	121	137
HKEMPFPKYPVEPFTES	0	0	1	0	0	0	sp|P02666|CASB_BOVIN	121	137
HKEMPFPKYPVEPFTESQ	0	0	0	0	0	0	sp|P02666|CASB_BOVIN	121	138
HKEMPFPKYPVEPFTESQ	0	0	1	0	0	0	sp|P02666|CASB_BOVIN	121	138
HKEMPFPKYPVEPFTESQS	0	0	0	0	0	0	sp|P02666|CASB_BOVIN	121	139
HKEMPFPKYPVEPFTESQSL	0	0	1	0	0	0	sp|P02666|CASB_BOVIN	121	140
HKEMPFPKYPVEPFTESQSL	0	0	0	0	0	0	sp|P02666|CASB_BOVIN	121	140
HKEMPFPKYPVEPFTESQSLT	0	0	0	0	0	1	sp|P02666|CASB_BOVIN	121	141
HKEMPFPKYPVEPFTESQSLT	0	0	0	0	0	0	sp|P02666|CASB_BOVIN	121	141
HKEMPFPKYPVEPFTESQSLTL	0	0	0	0	0	0	sp|P02666|CASB_BOVIN	121	142
HKEMPFPKYPVEPFTESQSLTL	0	0	0	0	0	1	sp|P02666|CASB_BOVIN	121	142
HKEMPFPKYPVEPFTESQSLTLTD	0	0	0	0	0	1	sp|P02666|CASB_BOVIN	121	144
HKEMPFPKYPVEPFTESQSLTLTDVENL	0	0	0	0	0	1	sp|P02666|CASB_BOVIN	121	148
HKEMPFPKYPVEPFTESQSLTLTDVENLH	0	0	0	0	0	0	sp|P02666|CASB_BOVIN	121	149
HKEMPFPKYPVEPFTESQSLTLTDVENLHL	0	0	0	0	0	1	sp|P02666|CASB_BOVIN	121	150
HKEMPFPKYPVEPFTESQSLTLTDVENLHL	0	0	0	0	0	0	sp|P02666|CASB_BOVIN	121	150
HKEMPFPKYPVEPFTESQSLTLTDVENLHLP	0	0	0	0	0	0	sp|P02666|CASB_BOVIN	121	151
HKEMPFPKYPVEPFTESQSLTLTDVENLHLP	0	0	1	0	0	0	sp|P02666|CASB_BOVIN	121	151
HKEMPFPKYPVEPFTESQSLTLTDVENLHLP	0	0	0	0	0	1	sp|P02666|CASB_BOVIN	121	151
HKEMPFPKYPVEPFTESQSLTLTDVENLHLPL	0	0	0	0	0	1	sp|P02666|CASB_BOVIN	121	152
HKEMPFPKYPVEPFTESQSLTLTDVENLHLPL	0	0	0	0	0	0	sp|P02666|CASB_BOVIN	121	152
HKEMPFPKYPVEPFTESQSLTLTDVENLHLPL	0	0	1	0	0	0	sp|P02666|CASB_BOVIN	121	152
HKEMPFPKYPVEPFTESQSLTLTDVENLHLPL	0	0	0	0	0	2	sp|P02666|CASB_BOVIN	121	152
HKEMPFPKYPVEPFTESQSLTLTDVENLHLPL	0	1	0	0	0	0	sp|P02666|CASB_BOVIN	121	152
HKEMPFPKYPVEPFTESQSLTLTDVENLHLPLP	0	0	0	0	0	1	sp|P02666|CASB_BOVIN	121	153
HKEMPFPKYPVEPFTESQSLTLTDVENLHLPLP	0	0	0	0	0	0	sp|P02666|CASB_BOVIN	121	153
HKEMPFPKYPVEPFTESQSLTLTDVENLHLPLP	0	0	1	0	0	0	sp|P02666|CASB_BOVIN	121	153
HKEMPFPKYPVEPFTESQSLTLTDVENLHLPLP	0	0	0	0	0	2	sp|P02666|CASB_BOVIN	121	153
HKEMPFPKYPVEPFTESQSLTLTDVENLHLPLPL	0	0	0	0	0	1	sp|P02666|CASB_BOVIN	121	154
HKEMPFPKYPVEPFTESQSLTLTDVENLHLPLPL	0	0	0	0	0	0	sp|P02666|CASB_BOVIN	121	154
HKEMPFPKYPVEPFTESQSLTLTDVENLHLPLPLL	0	0	0	0	0	0	sp|P02666|CASB_BOVIN	121	155
HKEMPFPKYPVEPFTESQSLTLTDVENLHLPLPLL	0	0	0	0	0	1	sp|P02666|CASB_BOVIN	121	155
HKEMPFPKYPVEPFTESQSLTLTDVENLHLPLPLLQ	0	0	0	0	0	2	sp|P02666|CASB_BOVIN	121	156
HKEMPFPKYPVEPFTESQSLTLTDVENLHLPLPLLQ	0	0	0	0	0	1	sp|P02666|CASB_BOVIN	121	156
HKEMPFPKYPVEPFTESQSLTLTDVENLHLPLPLLQS	0	0	0	0	0	1	sp|P02666|CASB_BOVIN	121	157
HKEMPFPKYPVEPFTESQSLTLTDVENLHLPLPLLQS	0	0	0	0	0	2	sp|P02666|CASB_BOVIN	121	157
HKEMPFPKYPVEPFTESQSLTLTDVENLHLPLPLLQS	0	0	0	0	0	0	sp|P02666|CASB_BOVIN	121	157
HKEMPFPKYPVEPFTESQSLTLTDVENLHLPLPLLQS	0	0	1	0	0	0	sp|P02666|CASB_BOVIN	121	157
HKEMPFPKYPVEPFTESQSLTLTDVENLHLPLPLLQSW	0	0	1	0	0	0	sp|P02666|CASB_BOVIN	121	158
HKEMPFPKYPVEPFTESQSLTLTDVENLHLPLPLLQSW	0	0	0	0	0	0	sp|P02666|CASB_BOVIN	121	158
HLAMPGTITDVPPSVAQLLDNEESWEFNIFE	0	0	0	0	0	0	tr|F1N4J6|F1N4J6_BOVIN	428	458
HLFLYEDSKS	0	0	0	0	0	0	sp|P18892|BT1A1_BOVIN	315	324
HLPLLP	0	0	0	0	0	0	sp|Q0P564|CRBN_BOVIN	17	22
HLPLPLLQS	0	0	0	0	0	0	sp|P02666|CASB_BOVIN	149	157
HLPLPLLQSW	0	0	0	0	0	0	sp|P02666|CASB_BOVIN	149	158
HNIADYMTAKN	0	0	1	0	0	0	tr|A7Z025|A7Z025_BOVIN	1003	1013
HPHPHLSF	0	0	0	0	0	0	sp|P02668|CASK_BOVIN	119	126
HPIKHQGLPQEVLNENL	0	0	0	0	0	1	sp|P02662|CASA1_BOVIN	19	35
HPIKHQGLPQEVLNENLLR	0	0	0	0	0	0	sp|P02662|CASA1_BOVIN	19	37
HPIKHQGLPQEVLNENLLRF	0	0	0	0	0	0	sp|P02662|CASA1_BOVIN	19	38
HPPEDGKPNY	0	0	0	0	0	0	sp|P01888|B2MG_BOVIN	33	42
HPPHMNVNPQQP	0	0	1	0	0	0	tr|F1MX21|F1MX21_BOVIN	2645	2656
HPYYMALEEDGSAHGVLLLNSNAMADVTFQPTPA	0	0	2	0	0	0	tr|G3N3S2|G3N3S2_BOVIN	53	86
HQGLPQEVLNENLLRF	0	0	0	0	0	0	sp|P02662|CASA1_BOVIN	23	38
HQKAMKPWIQPK	0	0	0	0	0	0	sp|P02663|CASA2_BOVIN	201	212
HQKAMKPWIQPKTKVIPYVRY	0	0	0	0	0	1	sp|P02663|CASA2_BOVIN	201	221
HQPHQPLPP	0	0	0	0	0	0	sp|P02666|CASB_BOVIN	160	168
HQPHQPLPPT	0	0	0	0	0	0	sp|P02666|CASB_BOVIN	160	169
HQPHQPLPPTV	0	0	0	0	0	0	sp|P02666|CASB_BOVIN	160	170
HQPHQPLPPTVM	0	0	1	0	0	0	sp|P02666|CASB_BOVIN	160	171
HQPHQPLPPTVM	0	0	0	0	0	0	sp|P02666|CASB_BOVIN	160	171
HQPHQPLPPTVMF	0	0	0	0	0	0	sp|P02666|CASB_BOVIN	160	172
HQPHQPLPPTVMFPP	0	0	0	0	0	0	sp|P02666|CASB_BOVIN	160	174
HQPHQPLPPTVMFPPQ	0	0	0	0	0	0	sp|P02666|CASB_BOVIN	160	175
HQPHQPLPPTVMFPPQ	0	0	1	0	0	0	sp|P02666|CASB_BOVIN	160	175
HQPHQPLPPTVMFPPQS	0	0	1	0	0	0	sp|P02666|CASB_BOVIN	160	176
HQPHQPLPPTVMFPPQS	0	0	0	0	0	0	sp|P02666|CASB_BOVIN	160	176
HQPHQPLPPTVMFPPQS	0	1	0	0	0	0	sp|P02666|CASB_BOVIN	160	176
HQPHQPLPPTVMFPPQSV	0	0	1	0	0	0	sp|P02666|CASB_BOVIN	160	177
HQPHQPLPPTVMFPPQSV	0	0	0	0	0	0	sp|P02666|CASB_BOVIN	160	177
HQPHQPLPPTVMFPPQSVL	0	0	0	0	0	0	sp|P02666|CASB_BOVIN	160	178
HQPHQPLPPTVMFPPQSVL	0	0	1	0	0	0	sp|P02666|CASB_BOVIN	160	178
HQPHQPLPPTVMFPPQSVL	0	0	0	0	0	1	sp|P02666|CASB_BOVIN	160	178
HQPHQPLPPTVMFPPQSVLS	0	0	1	0	0	0	sp|P02666|CASB_BOVIN	160	179
HQPHQPLPPTVMFPPQSVLS	0	0	0	0	0	0	sp|P02666|CASB_BOVIN	160	179
HQPHQPLPPTVMFPPQSVLSL	0	0	0	0	0	0	sp|P02666|CASB_BOVIN	160	180
HQPHQPLPPTVMFPPQSVLSL	0	0	1	0	0	0	sp|P02666|CASB_BOVIN	160	180
HQPHQPLPPTVMFPPQSVLSL	0	0	0	0	0	1	sp|P02666|CASB_BOVIN	160	180
HQPHQPLPPTVMFPPQSVLSLS	0	0	1	0	0	0	sp|P02666|CASB_BOVIN	160	181
HQPHQPLPPTVMFPPQSVLSLS	0	0	0	0	0	0	sp|P02666|CASB_BOVIN	160	181
HQPHQPLPPTVMFPPQSVLSLS	0	0	0	0	0	1	sp|P02666|CASB_BOVIN	160	181
HQPHQPLPPTVMFPPQSVLSLSQ	0	0	1	0	0	0	sp|P02666|CASB_BOVIN	160	182
HQPHQPLPPTVMFPPQSVLSLSQ	0	0	0	0	0	1	sp|P02666|CASB_BOVIN	160	182
HQPHQPLPPTVMFPPQSVLSLSQ	0	0	0	0	0	0	sp|P02666|CASB_BOVIN	160	182
HQPHQPLPPTVMFPPQSVLSLSQS	0	0	0	0	0	0	sp|P02666|CASB_BOVIN	160	183
HQPHQPLPPTVMFPPQSVLSLSQS	0	0	0	0	0	1	sp|P02666|CASB_BOVIN	160	183
HQPHQPLPPTVMFPPQSVLSLSQSK	0	0	0	0	0	0	sp|P02666|CASB_BOVIN	160	184
HQPHQPLPPTVMFPPQSVLSLSQSKVL	0	3	0	0	0	0	sp|P02666|CASB_BOVIN	160	186
HQPHQPLPPTVMFPPQSVLSLSQSKVLPV	0	2	0	0	0	0	sp|P02666|CASB_BOVIN	160	188
HQPHQPLPPTVMFPPQSVLSLSQSKVLPVP	0	0	0	0	0	0	sp|P02666|CASB_BOVIN	160	189
HQPHQPLPPTVMFPPQSVLSLSQSKVLPVP	0	0	0	0	0	1	sp|P02666|CASB_BOVIN	160	189
HQPHQPLPPTVMFPPQSVLSLSQSKVLPVPQ	0	0	0	0	0	0	sp|P02666|CASB_BOVIN	160	190
HQPHQPLPPTVMFPPQSVLSLSQSKVLPVPQ	0	0	0	0	0	1	sp|P02666|CASB_BOVIN	160	190
HQPHQPLPPTVMFPPQSVLSLSQSKVLPVPQK	0	2	0	0	0	0	sp|P02666|CASB_BOVIN	160	191
HQPHQPLPPTVMFPPQSVLSLSQSKVLPVPQK	0	3	0	0	0	0	sp|P02666|CASB_BOVIN	160	191
HQPHQPLPPTVMFPPQSVLSLSQSKVLPVPQK	0	0	0	0	0	1	sp|P02666|CASB_BOVIN	160	191
HQPHQPLPPTVMFPPQSVLSLSQSKVLPVPQK	0	0	0	0	0	0	sp|P02666|CASB_BOVIN	160	191
HQPHQPLPPTVMFPPQSVLSLSQSKVLPVPQKAVPYP	0	0	0	0	0	1	sp|P02666|CASB_BOVIN	160	196
HQPHQPLPPTVMFPPQSVLSLSQSKVLPVPQKAVPYPQ	0	0	0	0	0	1	sp|P02666|CASB_BOVIN	160	197
HQPLPPT	0	0	0	0	0	0	sp|P02666|CASB_BOVIN	163	169
HQPLPPTVM	0	0	0	0	0	0	sp|P02666|CASB_BOVIN	163	171
HQPLPPTVMFPPQ	0	0	0	0	0	0	sp|P02666|CASB_BOVIN	163	175
HQPLPPTVMFPPQ	0	0	1	0	0	0	sp|P02666|CASB_BOVIN	163	175
HQPLPPTVMFPPQS	0	0	0	0	0	0	sp|P02666|CASB_BOVIN	163	176
HQPLPPTVMFPPQSV	0	0	0	0	0	0	sp|P02666|CASB_BOVIN	163	177
HQPLPPTVMFPPQSVL	0	0	0	0	0	0	sp|P02666|CASB_BOVIN	163	178
HQPLPPTVMFPPQSVLS	0	0	0	0	0	0	sp|P02666|CASB_BOVIN	163	179
HQPLPPTVMFPPQSVLSL	0	0	0	0	0	0	sp|P02666|CASB_BOVIN	163	180
HSMKEGIHAQQKEPMIGVN	0	0	0	0	0	0	sp|P02662|CASA1_BOVIN	136	154
HSMKEGIHAQQKEPMIGVNQE	0	0	0	0	0	0	sp|P02662|CASA1_BOVIN	136	156
HSMKEGIHAQQKEPMIGVNQE	0	0	0	0	0	1	sp|P02662|CASA1_BOVIN	136	156
HSMKEGIHAQQKEPMIGVNQELAYFYPEL	0	0	0	0	0	1	sp|P02662|CASA1_BOVIN	136	164
HSMKEGIHAQQKEPMIGVNQELAYFYPELFR	0	0	1	0	0	0	sp|P02662|CASA1_BOVIN	136	166
HSMKEGIHAQQKEPMIGVNQELAYFYPELFR	0	0	0	0	0	0	sp|P02662|CASA1_BOVIN	136	166
HVSSSEESIIS	0	0	0	0	0	0	sp|P02663|CASA2_BOVIN	21	31
HVSSSEESIIS	0	2	0	0	0	0	sp|P02663|CASA2_BOVIN	21	31
HVSSSEESIISQ	0	2	0	0	0	0	sp|P02663|CASA2_BOVIN	21	32
HVSSSEESIISQE	0	1	0	0	0	0	sp|P02663|CASA2_BOVIN	21	33
HVSSSEESIISQE	0	2	0	0	0	0	sp|P02663|CASA2_BOVIN	21	33
HVSSSEESIISQE	0	3	0	0	0	0	sp|P02663|CASA2_BOVIN	21	33
HYQKALNEINQ	0	0	0	0	0	0	sp|P02663|CASA2_BOVIN	92	102
HYQKALNEINQF	0	0	0	0	0	0	sp|P02663|CASA2_BOVIN	92	103
IDALNENKVLVLDTDYKKY	0	0	0	0	0	0	sp|P02754|LACB_BOVIN	100	118
IDAPGHRDF	0	0	0	0	0	0	sp|P68103|EF1A1_BOVIN	90	98
IDAPGHRDFIKN	0	0	0	0	0	0	sp|P68103|EF1A1_BOVIN	90	101
IDDPDGLKVN	0	0	0	0	0	0	sp|Q2UVX4|CO3_BOVIN	244	253
IDEIDAIGTK	0	0	0	0	0	0	tr|A4FUZ3|A4FUZ3_BOVIN	284	293
IDIGQVEGAFVQGLGL	0	0	0	0	0	0	sp|P80457|XDH_BOVIN	1190	1205
IDSPGHVDFSSEVT	0	0	0	0	0	0	sp|Q3SYU2|EF2_BOVIN	103	116
IDSPGHVDFSSEVTA	0	0	0	0	0	0	sp|Q3SYU2|EF2_BOVIN	103	117
IDSPGHVDFSSEVTAA	0	0	0	0	0	0	sp|Q3SYU2|EF2_BOVIN	103	118
IEEHEQKGQ	0	0	0	0	0	0	tr|E1BF59|E1BF59_BOVIN	3060	3068
IEEPTEVEDPWDLPEL	0	0	0	0	0	0	sp|Q27960|NPT2B_BOVIN	59	74
IEEPTEVEDPWDLPELK	0	0	0	0	0	0	sp|Q27960|NPT2B_BOVIN	59	75
IEEPTEVEDPWDLPELKDT	0	0	0	0	0	0	sp|Q27960|NPT2B_BOVIN	59	77
IEIPYSREDEFFS	0	0	0	0	0	0	sp|P80457|XDH_BOVIN	407	419
IEKFQSEEQQQT	0	1	0	0	0	0	sp|P02666|CASB_BOVIN	45	56
IEKFQSEEQQQTE	0	1	0	0	0	0	sp|P02666|CASB_BOVIN	45	57
IEKFQSEEQQQTE	0	0	0	0	0	0	sp|P02666|CASB_BOVIN	45	57
IEKFQSEEQQQTEDELQDK	0	1	0	0	0	0	sp|P02666|CASB_BOVIN	45	63
IEKFQSEEQQQTEDELQDKIHPF	0	1	0	0	0	0	sp|P02666|CASB_BOVIN	45	67
IEKFQSEEQQQTEDELQDKIHPFAQTQ	0	1	0	0	0	0	sp|P02666|CASB_BOVIN	45	71
IGHVDSGKSTTTGHL	0	0	0	0	0	0	sp|P68103|EF1A1_BOVIN	13	27
IGKEGCRPRAFCLADSDE	0	0	0	0	0	0	tr|F1MJA6|F1MJA6_BOVIN	932	949
IGLHEVEVKA	0	0	0	0	0	0	sp|Q2UVX4|CO3_BOVIN	904	913
IGVNQELAYFYPELFR	0	0	0	0	0	0	sp|P02662|CASA1_BOVIN	151	166
IGVNQELAYFYPELFRQ	0	0	0	0	0	0	sp|P02662|CASA1_BOVIN	151	167
IHAQQKEPMIG	0	0	0	0	0	0	sp|P02662|CASA1_BOVIN	142	152
IHAQQKEPMIGVNQEL	0	0	0	0	0	0	sp|P02662|CASA1_BOVIN	142	157
IHAQQKEPMIGVNQELAY	0	0	0	0	0	0	sp|P02662|CASA1_BOVIN	142	159
IHAQQKEPMIGVNQELAYFYPEL	0	0	0	0	0	0	sp|P02662|CASA1_BOVIN	142	164
IHAQQKEPMIGVNQELAYFYPELFR	0	0	0	0	0	0	sp|P02662|CASA1_BOVIN	142	166
IHPMNCLITLISLLGTTFGGNVLIWPME	0	0	1	0	0	0	tr|G3MX72|G3MX72_BOVIN	1	28
IIYQTHKRVWPASQR	0	0	0	0	0	0	sp|Q9GKI7|C43BP_BOVIN	490	504
INNQFLPYPYYAKPAA	0	0	0	0	0	0	sp|P02668|CASK_BOVIN	72	87
INQFYQKFPQY	0	0	0	0	0	0	sp|P02663|CASA2_BOVIN	100	110
IPEEQTLMEEAPP	0	0	1	0	0	0	tr|E1BCD5|E1BCD5_BOVIN	744	756
IPIQYVLSRYPSY	0	0	0	0	0	0	sp|P02668|CASK_BOVIN	47	59
IPIQYVLSRYPSYGLNYY	0	0	0	0	0	1	sp|P02668|CASK_BOVIN	47	64
IPIQYVLSRYPSYGLNYYQQKPVALINNQFLPYPYY	0	0	0	0	0	2	sp|P02668|CASK_BOVIN	47	82
IPIQYVLSRYPSYGLNYYQQKPVALINNQFLPYPYY	0	0	0	0	0	1	sp|P02668|CASK_BOVIN	47	82
IPIQYVLSRYPSYGLNYYQQKPVALINNQFLPYPYYAKP	0	0	0	0	0	1	sp|P02668|CASK_BOVIN	47	85
IPKGEEGEMELF	0	0	0	0	0	0	sp|P80457|XDH_BOVIN	752	763
IPLLGA	0	0	0	0	0	0	sp|Q3T0E5|APMAP_BOVIN	51	56
IPNPIGSE	0	0	0	0	0	0	sp|P02662|CASA1_BOVIN	197	204
IPNPIGSEN	0	0	0	0	0	0	sp|P02662|CASA1_BOVIN	197	205
IPNPIGSENSEK	0	0	0	0	0	0	sp|P02662|CASA1_BOVIN	197	208
IPNPIGSENSEK	0	0	0	0	0	1	sp|P02662|CASA1_BOVIN	197	208
IPNPIGSENSEKT	0	0	0	0	0	0	sp|P02662|CASA1_BOVIN	197	209
IPNPIGSENSEKT	0	0	0	0	0	1	sp|P02662|CASA1_BOVIN	197	209
IPNPIGSENSEKTT	0	0	0	0	0	0	sp|P02662|CASA1_BOVIN	197	210
IPNPIGSENSEKTTMP	0	0	1	0	0	0	sp|P02662|CASA1_BOVIN	197	212
IPNPIGSENSEKTTMP	0	0	0	0	0	0	sp|P02662|CASA1_BOVIN	197	212
IPNPIGSENSEKTTMPL	0	0	1	0	0	0	sp|P02662|CASA1_BOVIN	197	213
IPNPIGSENSEKTTMPL	0	0	0	0	0	0	sp|P02662|CASA1_BOVIN	197	213
IPNPIGSENSEKTTMPL	0	0	0	0	0	1	sp|P02662|CASA1_BOVIN	197	213
IPNPIGSENSEKTTMPLW	0	0	0	0	0	0	sp|P02662|CASA1_BOVIN	197	214
IPNPIGSENSEKTTMPLW	0	0	1	0	0	0	sp|P02662|CASA1_BOVIN	197	214
IPPLTQTPVVVPPF	0	0	0	0	0	0	sp|P02666|CASB_BOVIN	89	102
IPPLTQTPVVVPPFLQP	0	0	0	0	0	0	sp|P02666|CASB_BOVIN	89	105
IPPLTQTPVVVPPFLQPEV	0	0	0	0	0	0	sp|P02666|CASB_BOVIN	89	107
IPPLTQTPVVVPPFLQPEVM	0	0	0	0	0	0	sp|P02666|CASB_BOVIN	89	108
IPPLTQTPVVVPPFLQPEVMGVS	0	0	0	0	0	0	sp|P02666|CASB_BOVIN	89	111
IPPLTQTPVVVPPFLQPEVMGVSK	0	0	0	0	0	1	sp|P02666|CASB_BOVIN	89	112
IPPLTQTPVVVPPFLQPEVMGVSK	0	0	0	0	0	0	sp|P02666|CASB_BOVIN	89	112
IQKEDVPSER	0	0	0	0	0	0	sp|P02662|CASA1_BOVIN	96	105
IQPKTKVIPYVRY	0	0	0	0	0	0	sp|P02663|CASA2_BOVIN	209	221
ITVDDKHYQ	0	0	0	0	0	0	sp|P02663|CASA2_BOVIN	86	94
ITVDDKHYQK	0	0	0	0	0	0	sp|P02663|CASA2_BOVIN	86	95
ITVDDKHYQKALNE	0	0	0	0	0	0	sp|P02663|CASA2_BOVIN	86	99
ITVDDKHYQKALNEINQ	0	0	0	0	0	1	sp|P02663|CASA2_BOVIN	86	102
ITVDDKHYQKALNEINQ	0	0	0	0	0	0	sp|P02663|CASA2_BOVIN	86	102
ITVDDKHYQKALNEINQF	0	0	0	0	0	1	sp|P02663|CASA2_BOVIN	86	103
IVLNPWDQVK	0	0	0	0	0	0	sp|P02663|CASA2_BOVIN	119	128
IVLNPWDQVKR	0	0	0	0	0	0	sp|P02663|CASA2_BOVIN	119	129
IVLNPWDQVKRN	0	0	0	0	0	0	sp|P02663|CASA2_BOVIN	119	130
IVLNPWDQVKRNA	0	0	0	0	0	0	sp|P02663|CASA2_BOVIN	119	131
IVPNSAEERLH	0	1	0	0	0	0	sp|P02662|CASA1_BOVIN	126	136
IVTQTMKGLDIQKVAGTW	0	0	0	0	0	0	sp|P02754|LACB_BOVIN	18	35
KAAEAAKAAEAAAK	0	0	0	0	0	0	sp|E1BB52|CDK13_BOVIN	473	486
KAAEPAADTGAQP	0	0	0	0	0	0	tr|E1BHZ4|E1BHZ4_BOVIN	1160	1172
KALNEINQF	0	0	0	0	0	0	sp|P02663|CASA2_BOVIN	95	103
KALNEINQFYQK	0	0	0	0	0	0	sp|P02663|CASA2_BOVIN	95	106
KALNEINQFYQKFP	0	0	0	0	0	0	sp|P02663|CASA2_BOVIN	95	108
KAMKPW	0	0	0	0	0	0	sp|P02663|CASA2_BOVIN	203	208
KAMKPWIQPK	0	0	0	0	0	0	sp|P02663|CASA2_BOVIN	203	212
KAMKPWIQPKTK	0	0	0	0	0	0	sp|P02663|CASA2_BOVIN	203	214
KAMKPWIQPKTKVIPY	0	0	0	0	0	0	sp|P02663|CASA2_BOVIN	203	218
KAMKPWIQPKTKVIPYVR	0	0	0	0	0	0	sp|P02663|CASA2_BOVIN	203	220
KAMKPWIQPKTKVIPYVRY	0	0	0	0	0	0	sp|P02663|CASA2_BOVIN	203	221
KAVPYPQR	0	0	0	0	0	0	sp|P02666|CASB_BOVIN	191	198
KAVPYPQR	0	0	0	0	0	1	sp|P02666|CASB_BOVIN	191	198
KAVPYPQRD	0	0	0	0	0	0	sp|P02666|CASB_BOVIN	191	199
KAVPYPQRD	0	0	0	0	0	1	sp|P02666|CASB_BOVIN	191	199
KAVPYPQRDM	0	0	0	0	0	0	sp|P02666|CASB_BOVIN	191	200
KAVPYPQRDM	0	0	1	0	0	0	sp|P02666|CASB_BOVIN	191	200
KAVPYPQRDMP	0	0	1	0	0	0	sp|P02666|CASB_BOVIN	191	201
KAVPYPQRDMP	0	0	0	0	0	0	sp|P02666|CASB_BOVIN	191	201
KAVPYPQRDMPI	0	0	1	0	0	0	sp|P02666|CASB_BOVIN	191	202
KAVPYPQRDMPI	0	0	0	0	0	0	sp|P02666|CASB_BOVIN	191	202
KAVPYPQRDMPIQ	0	0	1	0	0	0	sp|P02666|CASB_BOVIN	191	203
KAVPYPQRDMPIQ	0	0	0	0	0	0	sp|P02666|CASB_BOVIN	191	203
KAVPYPQRDMPIQ	0	0	0	0	0	1	sp|P02666|CASB_BOVIN	191	203
KAVPYPQRDMPIQA	0	0	1	0	0	0	sp|P02666|CASB_BOVIN	191	204
KAVPYPQRDMPIQA	0	0	0	0	0	0	sp|P02666|CASB_BOVIN	191	204
KAVPYPQRDMPIQA	0	0	0	0	0	1	sp|P02666|CASB_BOVIN	191	204
KAVPYPQRDMPIQAF	0	0	1	0	0	0	sp|P02666|CASB_BOVIN	191	205
KAVPYPQRDMPIQAF	0	0	0	0	0	0	sp|P02666|CASB_BOVIN	191	205
KAVPYPQRDMPIQAF	0	0	0	0	0	1	sp|P02666|CASB_BOVIN	191	205
KAVPYPQRDMPIQAFL	0	0	1	0	0	0	sp|P02666|CASB_BOVIN	191	206
KAVPYPQRDMPIQAFL	0	0	0	0	0	0	sp|P02666|CASB_BOVIN	191	206
KAVPYPQRDMPIQAFLL	0	0	0	0	0	0	sp|P02666|CASB_BOVIN	191	207
KAVPYPQRDMPIQAFLLY	0	0	0	0	0	0	sp|P02666|CASB_BOVIN	191	208
KAVPYPQRDMPIQAFLLYQEPVLGPVRGPFP	0	0	0	0	0	1	sp|P02666|CASB_BOVIN	191	221
KAVPYPQRDMPIQAFLLYQEPVLGPVRGPFPI	0	0	0	0	0	0	sp|P02666|CASB_BOVIN	191	222
KAVPYPQRDMPIQAFLLYQEPVLGPVRGPFPI	0	0	0	0	0	1	sp|P02666|CASB_BOVIN	191	222
KCEVKSCDDIPN	0	0	0	0	0	0	tr|G3MYG3|G3MYG3_BOVIN	331	342
KDERFFSDKIA	0	0	0	0	0	0	sp|P02668|CASK_BOVIN	34	44
KDERFFSDKIAK	0	0	0	0	0	0	sp|P02668|CASK_BOVIN	34	45
KDERFFSDKIAKYIPIQ	0	0	0	0	0	0	sp|P02668|CASK_BOVIN	34	50
KDIGSESTEDQAME	0	2	0	0	0	0	sp|P02662|CASA1_BOVIN	57	70
KDLGEEHFKGL	0	0	0	0	0	0	sp|P02769|ALBU_BOVIN	36	46
KDMDFPVVLQP	0	0	0	0	0	0	sp|Q2KIJ8|DNJ5B_BOVIN	168	178
KDSYVGDEAQSK	0	0	0	0	0	0	sp|P60712|ACTB_BOVIN	50	61
KDTDSEEEIREAF	0	0	0	0	0	0	sp|P62157|CALM_BOVIN	78	90
KDVPDHKEL	0	0	0	0	0	0	sp|Q2UVX4|CO3_BOVIN	1283	1291
KEAMAPKHKEMPFPKYPVEPF	0	0	1	0	0	0	sp|P02666|CASB_BOVIN	114	134
KEAMAPKHKEMPFPKYPVEPF	0	0	0	0	0	0	sp|P02666|CASB_BOVIN	114	134
KEAMAPKHKEMPFPKYPVEPFTESQ	0	0	0	0	0	0	sp|P02666|CASB_BOVIN	114	138
KEDVPSERY	0	0	0	0	0	0	sp|P02662|CASA1_BOVIN	98	106
KEDVPSERYL	0	0	0	0	0	0	sp|P02662|CASA1_BOVIN	98	107
KEDVPSERYLG	0	0	0	0	0	0	sp|P02662|CASA1_BOVIN	98	108
KEDVPSERYLGY	0	0	0	0	0	0	sp|P02662|CASA1_BOVIN	98	109
KEDVPSERYLGYL	0	0	0	0	0	0	sp|P02662|CASA1_BOVIN	98	110
KEDVPSERYLGYLE	0	0	0	0	0	0	sp|P02662|CASA1_BOVIN	98	111
KEDVPSERYLGYLEQ	0	0	0	0	0	0	sp|P02662|CASA1_BOVIN	98	112
KEDVPSERYLGYLEQL	0	0	0	0	0	0	sp|P02662|CASA1_BOVIN	98	113
KEDVPSERYLGYLEQLL	0	0	0	0	0	0	sp|P02662|CASA1_BOVIN	98	114
KEDVPSERYLGYLEQLLR	0	0	0	0	0	0	sp|P02662|CASA1_BOVIN	98	115
KEDVPSERYLGYLEQLLRLK	0	0	0	0	0	0	sp|P02662|CASA1_BOVIN	98	117
KEDVPSERYLGYLEQLLRLKKY	0	0	0	0	0	1	sp|P02662|CASA1_BOVIN	98	119
KEGIHAQQKEPM	0	0	0	0	0	0	sp|P02662|CASA1_BOVIN	139	150
KEGIHAQQKEPMIG	0	0	1	0	0	0	sp|P02662|CASA1_BOVIN	139	152
KEGIHAQQKEPMIG	0	0	0	0	0	0	sp|P02662|CASA1_BOVIN	139	152
KEGIHAQQKEPMIGVN	0	0	1	0	0	0	sp|P02662|CASA1_BOVIN	139	154
KEGIHAQQKEPMIGVN	0	0	0	0	0	0	sp|P02662|CASA1_BOVIN	139	154
KEGIHAQQKEPMIGVN	0	0	0	0	0	1	sp|P02662|CASA1_BOVIN	139	154
KEGIHAQQKEPMIGVNQ	0	0	0	0	0	0	sp|P02662|CASA1_BOVIN	139	155
KEGIHAQQKEPMIGVNQE	0	0	1	0	0	0	sp|P02662|CASA1_BOVIN	139	156
KEGIHAQQKEPMIGVNQE	0	0	0	0	0	0	sp|P02662|CASA1_BOVIN	139	156
KEGIHAQQKEPMIGVNQEL	0	0	0	0	0	0	sp|P02662|CASA1_BOVIN	139	157
KEGIHAQQKEPMIGVNQELA	0	0	0	0	0	0	sp|P02662|CASA1_BOVIN	139	158
KEGIHAQQKEPMIGVNQELAY	0	0	0	0	0	0	sp|P02662|CASA1_BOVIN	139	159
KEGIHAQQKEPMIGVNQELAYFYPE	0	0	0	0	0	1	sp|P02662|CASA1_BOVIN	139	163
KEGIHAQQKEPMIGVNQELAYFYPE	0	0	0	0	0	0	sp|P02662|CASA1_BOVIN	139	163
KEGIHAQQKEPMIGVNQELAYFYPEL	0	0	1	0	0	0	sp|P02662|CASA1_BOVIN	139	164
KEGIHAQQKEPMIGVNQELAYFYPEL	0	0	0	0	0	0	sp|P02662|CASA1_BOVIN	139	164
KEGIHAQQKEPMIGVNQELAYFYPEL	0	0	0	0	0	1	sp|P02662|CASA1_BOVIN	139	164
KEGIHAQQKEPMIGVNQELAYFYPELF	0	0	0	0	0	1	sp|P02662|CASA1_BOVIN	139	165
KEGIHAQQKEPMIGVNQELAYFYPELFR	0	0	0	0	0	0	sp|P02662|CASA1_BOVIN	139	166
KEGIHAQQKEPMIGVNQELAYFYPELFR	0	0	0	0	0	1	sp|P02662|CASA1_BOVIN	139	166
KEGIHAQQKEPMIGVNQELAYFYPELFRQ	0	0	0	0	0	1	sp|P02662|CASA1_BOVIN	139	167
KEGIHAQQKEPMIGVNQELAYFYPELFRQ	0	0	0	0	0	0	sp|P02662|CASA1_BOVIN	139	167
KEGNGIGVN	0	0	0	0	0	0	tr|F1MY82|F1MY82_BOVIN	337	345
KEIFEQPESVVN	0	0	0	0	0	0	tr|F1MZY2|F1MZY2_BOVIN	211	222
KEIFEQPESVVNT	0	0	0	0	0	0	tr|F1MZY2|F1MZY2_BOVIN	211	223
KEMPFPK	0	0	0	0	0	0	sp|P02666|CASB_BOVIN	122	128
KEMPFPKYPVE	0	0	0	0	0	0	sp|P02666|CASB_BOVIN	122	132
KEMPFPKYPVEP	0	0	1	0	0	0	sp|P02666|CASB_BOVIN	122	133
KEMPFPKYPVEP	0	0	0	0	0	0	sp|P02666|CASB_BOVIN	122	133
KEMPFPKYPVEPF	0	0	1	0	0	0	sp|P02666|CASB_BOVIN	122	134
KEMPFPKYPVEPF	0	0	0	0	0	0	sp|P02666|CASB_BOVIN	122	134
KEMPFPKYPVEPFTE	0	0	0	0	0	0	sp|P02666|CASB_BOVIN	122	136
KEMPFPKYPVEPFTES	0	0	0	0	0	0	sp|P02666|CASB_BOVIN	122	137
KEMPFPKYPVEPFTESQ	0	0	1	0	0	0	sp|P02666|CASB_BOVIN	122	138
KEMPFPKYPVEPFTESQ	0	0	0	0	0	0	sp|P02666|CASB_BOVIN	122	138
KEMPFPKYPVEPFTESQ	0	0	0	0	0	1	sp|P02666|CASB_BOVIN	122	138
KEMPFPKYPVEPFTESQS	0	0	0	0	0	0	sp|P02666|CASB_BOVIN	122	139
KEMPFPKYPVEPFTESQS	0	0	1	0	0	0	sp|P02666|CASB_BOVIN	122	139
KEMPFPKYPVEPFTESQSL	0	0	0	0	0	0	sp|P02666|CASB_BOVIN	122	140
KEMPFPKYPVEPFTESQSLT	0	0	0	0	0	0	sp|P02666|CASB_BOVIN	122	141
KEMPFPKYPVEPFTESQSLTL	0	0	0	0	0	0	sp|P02666|CASB_BOVIN	122	142
KEMPFPKYPVEPFTESQSLTLTD	0	0	0	0	0	0	sp|P02666|CASB_BOVIN	122	144
KEMPFPKYPVEPFTESQSLTLTD	0	0	0	0	0	1	sp|P02666|CASB_BOVIN	122	144
KEMPFPKYPVEPFTESQSLTLTDV	0	0	0	0	0	1	sp|P02666|CASB_BOVIN	122	145
KEMPFPKYPVEPFTESQSLTLTDVE	0	0	0	0	0	1	sp|P02666|CASB_BOVIN	122	146
KEMPFPKYPVEPFTESQSLTLTDVE	0	0	0	0	0	0	sp|P02666|CASB_BOVIN	122	146
KEMPFPKYPVEPFTESQSLTLTDVEN	0	0	0	0	0	1	sp|P02666|CASB_BOVIN	122	147
KEMPFPKYPVEPFTESQSLTLTDVEN	0	0	0	0	0	0	sp|P02666|CASB_BOVIN	122	147
KEMPFPKYPVEPFTESQSLTLTDVENL	0	0	0	0	0	1	sp|P02666|CASB_BOVIN	122	148
KEMPFPKYPVEPFTESQSLTLTDVENL	0	0	0	0	0	0	sp|P02666|CASB_BOVIN	122	148
KEMPFPKYPVEPFTESQSLTLTDVENL	0	0	0	0	0	2	sp|P02666|CASB_BOVIN	122	148
KEMPFPKYPVEPFTESQSLTLTDVENLH	0	0	1	0	0	0	sp|P02666|CASB_BOVIN	122	149
KEMPFPKYPVEPFTESQSLTLTDVENLH	0	0	0	0	0	1	sp|P02666|CASB_BOVIN	122	149
KEMPFPKYPVEPFTESQSLTLTDVENLH	0	0	0	0	0	0	sp|P02666|CASB_BOVIN	122	149
KEMPFPKYPVEPFTESQSLTLTDVENLHL	0	0	1	0	0	0	sp|P02666|CASB_BOVIN	122	150
KEMPFPKYPVEPFTESQSLTLTDVENLHL	0	0	0	0	0	1	sp|P02666|CASB_BOVIN	122	150
KEMPFPKYPVEPFTESQSLTLTDVENLHL	0	0	0	0	0	0	sp|P02666|CASB_BOVIN	122	150
KEMPFPKYPVEPFTESQSLTLTDVENLHLP	0	0	1	0	0	0	sp|P02666|CASB_BOVIN	122	151
KEMPFPKYPVEPFTESQSLTLTDVENLHLP	0	0	0	0	0	0	sp|P02666|CASB_BOVIN	122	151
KEMPFPKYPVEPFTESQSLTLTDVENLHLP	0	0	0	0	0	1	sp|P02666|CASB_BOVIN	122	151
KEMPFPKYPVEPFTESQSLTLTDVENLHLPL	0	0	1	0	0	0	sp|P02666|CASB_BOVIN	122	152
KEMPFPKYPVEPFTESQSLTLTDVENLHLPL	0	0	0	0	0	0	sp|P02666|CASB_BOVIN	122	152
KEMPFPKYPVEPFTESQSLTLTDVENLHLPL	0	0	0	0	0	1	sp|P02666|CASB_BOVIN	122	152
KEMPFPKYPVEPFTESQSLTLTDVENLHLPL	0	0	0	0	0	2	sp|P02666|CASB_BOVIN	122	152
KEMPFPKYPVEPFTESQSLTLTDVENLHLPLP	0	0	1	0	0	0	sp|P02666|CASB_BOVIN	122	153
KEMPFPKYPVEPFTESQSLTLTDVENLHLPLP	0	0	0	0	0	0	sp|P02666|CASB_BOVIN	122	153
KEMPFPKYPVEPFTESQSLTLTDVENLHLPLP	0	0	0	0	0	1	sp|P02666|CASB_BOVIN	122	153
KEMPFPKYPVEPFTESQSLTLTDVENLHLPLPL	0	0	1	0	0	0	sp|P02666|CASB_BOVIN	122	154
KEMPFPKYPVEPFTESQSLTLTDVENLHLPLPL	0	0	0	0	0	1	sp|P02666|CASB_BOVIN	122	154
KEMPFPKYPVEPFTESQSLTLTDVENLHLPLPL	0	0	0	0	0	0	sp|P02666|CASB_BOVIN	122	154
KEMPFPKYPVEPFTESQSLTLTDVENLHLPLPL	0	0	0	0	0	2	sp|P02666|CASB_BOVIN	122	154
KEMPFPKYPVEPFTESQSLTLTDVENLHLPLPLL	0	0	1	0	0	0	sp|P02666|CASB_BOVIN	122	155
KEMPFPKYPVEPFTESQSLTLTDVENLHLPLPLL	0	0	0	0	0	0	sp|P02666|CASB_BOVIN	122	155
KEMPFPKYPVEPFTESQSLTLTDVENLHLPLPLL	0	0	0	0	0	1	sp|P02666|CASB_BOVIN	122	155
KEMPFPKYPVEPFTESQSLTLTDVENLHLPLPLLQ	0	0	1	0	0	0	sp|P02666|CASB_BOVIN	122	156
KEMPFPKYPVEPFTESQSLTLTDVENLHLPLPLLQ	0	0	0	0	0	2	sp|P02666|CASB_BOVIN	122	156
KEMPFPKYPVEPFTESQSLTLTDVENLHLPLPLLQ	0	0	0	0	0	1	sp|P02666|CASB_BOVIN	122	156
KEMPFPKYPVEPFTESQSLTLTDVENLHLPLPLLQ	0	0	0	0	0	0	sp|P02666|CASB_BOVIN	122	156
KEMPFPKYPVEPFTESQSLTLTDVENLHLPLPLLQS	0	0	0	0	0	0	sp|P02666|CASB_BOVIN	122	157
KEMPFPKYPVEPFTESQSLTLTDVENLHLPLPLLQS	0	0	0	0	0	1	sp|P02666|CASB_BOVIN	122	157
KEMPFPKYPVEPFTESQSLTLTDVENLHLPLPLLQS	0	0	1	0	0	0	sp|P02666|CASB_BOVIN	122	157
KEMPFPKYPVEPFTESQSLTLTDVENLHLPLPLLQS	0	0	0	0	0	2	sp|P02666|CASB_BOVIN	122	157
KEMPFPKYPVEPFTESQSLTLTDVENLHLPLPLLQS	0	1	0	0	0	0	sp|P02666|CASB_BOVIN	122	157
KEMPFPKYPVEPFTESQSLTLTDVENLHLPLPLLQSW	0	0	0	0	0	1	sp|P02666|CASB_BOVIN	122	158
KEPMIGVN	0	0	0	0	0	0	sp|P02662|CASA1_BOVIN	147	154
KEPMIGVN	0	0	1	0	0	0	sp|P02662|CASA1_BOVIN	147	154
KEPMIGVNQ	0	0	1	0	0	0	sp|P02662|CASA1_BOVIN	147	155
KEPMIGVNQ	0	0	0	0	0	0	sp|P02662|CASA1_BOVIN	147	155
KEPMIGVNQE	0	0	1	0	0	0	sp|P02662|CASA1_BOVIN	147	156
KEPMIGVNQE	0	0	0	0	0	0	sp|P02662|CASA1_BOVIN	147	156
KEPMIGVNQEL	0	0	1	0	0	0	sp|P02662|CASA1_BOVIN	147	157
KEPMIGVNQEL	0	0	0	0	0	0	sp|P02662|CASA1_BOVIN	147	157
KEPMIGVNQEL	0	0	0	0	0	1	sp|P02662|CASA1_BOVIN	147	157
KEPMIGVNQELA	0	0	0	0	0	0	sp|P02662|CASA1_BOVIN	147	158
KEPMIGVNQELAY	0	0	1	0	0	0	sp|P02662|CASA1_BOVIN	147	159
KEPMIGVNQELAY	0	0	0	0	0	0	sp|P02662|CASA1_BOVIN	147	159
KEPMIGVNQELAY	0	0	0	0	0	1	sp|P02662|CASA1_BOVIN	147	159
KEPMIGVNQELAYFY	0	0	0	0	0	0	sp|P02662|CASA1_BOVIN	147	161
KEPMIGVNQELAYFYP	0	0	0	0	0	0	sp|P02662|CASA1_BOVIN	147	162
KEPMIGVNQELAYFYPE	0	0	1	0	0	0	sp|P02662|CASA1_BOVIN	147	163
KEPMIGVNQELAYFYPE	0	0	0	0	0	0	sp|P02662|CASA1_BOVIN	147	163
KEPMIGVNQELAYFYPEL	0	0	1	0	0	0	sp|P02662|CASA1_BOVIN	147	164
KEPMIGVNQELAYFYPEL	0	0	0	0	0	0	sp|P02662|CASA1_BOVIN	147	164
KEPMIGVNQELAYFYPEL	0	0	0	0	0	1	sp|P02662|CASA1_BOVIN	147	164
KEPMIGVNQELAYFYPELF	0	0	0	0	0	0	sp|P02662|CASA1_BOVIN	147	165
KEPMIGVNQELAYFYPELFR	0	0	1	0	0	0	sp|P02662|CASA1_BOVIN	147	166
KEPMIGVNQELAYFYPELFR	0	0	0	0	0	0	sp|P02662|CASA1_BOVIN	147	166
KEPMIGVNQELAYFYPELFR	0	0	0	0	0	1	sp|P02662|CASA1_BOVIN	147	166
KEPMIGVNQELAYFYPELFRQ	0	0	1	0	0	0	sp|P02662|CASA1_BOVIN	147	167
KEPMIGVNQELAYFYPELFRQ	0	0	0	0	0	0	sp|P02662|CASA1_BOVIN	147	167
KEPMIGVNQELAYFYPELFRQ	0	0	0	0	0	1	sp|P02662|CASA1_BOVIN	147	167
KEPMIGVNQELAYFYPELFRQF	0	0	0	0	0	0	sp|P02662|CASA1_BOVIN	147	168
KFLDDDLTDDI	0	0	0	0	0	0	sp|P00711|LALBA_BOVIN	98	108
KFLDDDLTDDIM	0	0	1	0	0	0	sp|P00711|LALBA_BOVIN	98	109
KFLDDDLTDDIM	0	0	0	0	0	0	sp|P00711|LALBA_BOVIN	98	109
KFPQYLQYLYQGPIVLNPWDQVKR	0	0	0	0	0	1	sp|P02663|CASA2_BOVIN	106	129
KFQSEEQQQT	0	0	0	0	0	0	sp|P02666|CASB_BOVIN	47	56
KFQSEEQQQTED	0	1	0	0	0	0	sp|P02666|CASB_BOVIN	47	58
KFQSEEQQQTEDELQ	0	1	0	0	0	0	sp|P02666|CASB_BOVIN	47	61
KFQSEEQQQTEDELQDK	0	1	0	0	0	0	sp|P02666|CASB_BOVIN	47	63
KFQSEEQQQTEDELQDKIHPF	0	1	0	0	0	0	sp|P02666|CASB_BOVIN	47	67
KFQSEEQQQTEDELQDKIHPFAQTQ	0	1	0	0	0	0	sp|P02666|CASB_BOVIN	47	71
KGDLKKGFSEAD	0	0	0	0	0	0	sp|P80457|XDH_BOVIN	716	727
KGLDIQKVA	0	0	0	0	0	0	sp|P02754|LACB_BOVIN	24	32
KGLDIQKVAGTW	0	0	0	0	0	0	sp|P02754|LACB_BOVIN	24	35
KGLDIQKVAGTWYS	0	0	0	0	0	0	sp|P02754|LACB_BOVIN	24	37
KGRTFNLTAGSLESTE	0	0	0	0	0	0	sp|A7MBC2|PDXD1_BOVIN	660	675
KHKEMPFPKYPVEPF	0	0	0	0	0	0	sp|P02666|CASB_BOVIN	120	134
KHKEMPFPKYPVEPFTESQ	0	0	0	0	0	0	sp|P02666|CASB_BOVIN	120	138
KHKEMPFPKYPVEPFTESQSL	0	0	0	0	0	0	sp|P02666|CASB_BOVIN	120	140
KHKEMPFPKYPVEPFTESQSL	0	0	0	0	0	1	sp|P02666|CASB_BOVIN	120	140
KHKEMPFPKYPVEPFTESQSLTLTDVENLHLPLPLLQS	0	0	0	0	0	1	sp|P02666|CASB_BOVIN	120	157
KHKEMPFPKYPVEPFTESQSLTLTDVENLHLPLPLLQS	0	0	0	0	0	2	sp|P02666|CASB_BOVIN	120	157
KHYQKALNEINQ	0	0	0	0	0	0	sp|P02663|CASA2_BOVIN	91	102
KHYQKALNEINQF	0	0	0	0	0	0	sp|P02663|CASA2_BOVIN	91	103
KIAKYIPIQY	0	0	0	0	0	0	sp|P02668|CASK_BOVIN	42	51
KIAKYIPIQYVLSRY	0	0	0	0	0	0	sp|P02668|CASK_BOVIN	42	56
KIDALNENK	0	0	0	0	0	0	sp|P02754|LACB_BOVIN	99	107
KIDALNENKVLVLDTDYKKY	0	0	0	0	0	0	sp|P02754|LACB_BOVIN	99	118
KIEADQGARVG	0	0	0	0	0	0	sp|Q2UVX4|CO3_BOVIN	582	592
KIEKFQSEEQQQTE	0	1	0	0	0	0	sp|P02666|CASB_BOVIN	44	57
KIEKFQSEEQQQTEDELQDK	0	1	0	0	0	0	sp|P02666|CASB_BOVIN	44	63
KIEKFQSEEQQQTEDELQDKIHPF	0	1	0	0	0	0	sp|P02666|CASB_BOVIN	44	67
KIEKFQSEEQQQTEDELQDKIHPFAQTQ	0	1	0	0	0	0	sp|P02666|CASB_BOVIN	44	71
KITVDDKHYQ	0	0	0	0	0	0	sp|P02663|CASA2_BOVIN	85	94
KITVDDKHYQK	0	0	0	0	0	0	sp|P02663|CASA2_BOVIN	85	95
KITVDDKHYQKA	0	0	0	0	0	0	sp|P02663|CASA2_BOVIN	85	96
KITVDDKHYQKALNE	0	0	0	0	0	0	sp|P02663|CASA2_BOVIN	85	99
KITVDDKHYQKALNEINQ	0	0	0	0	0	0	sp|P02663|CASA2_BOVIN	85	102
KITVDDKHYQKALNEINQF	0	0	0	0	0	0	sp|P02663|CASA2_BOVIN	85	103
KITVDDKHYQKALNEINQFYQKFPQY	0	0	0	0	0	1	sp|P02663|CASA2_BOVIN	85	110
KKFDASISFPPV	0	0	0	0	0	0	tr|E1BDX0|E1BDX0_BOVIN	255	266
KKFDASISFPPVS	0	0	0	0	0	0	tr|E1BDX0|E1BDX0_BOVIN	255	267
KKIEKFQSEEQQQTE	0	1	0	0	0	0	sp|P02666|CASB_BOVIN	43	57
KKIEKFQSEEQQQTEDELQDK	0	1	0	0	0	0	sp|P02666|CASB_BOVIN	43	63
KKIEKFQSEEQQQTEDELQDKIHPF	0	1	0	0	0	0	sp|P02666|CASB_BOVIN	43	67
KKYKVPQLEIVPNSAEE	0	1	0	0	0	0	sp|P02662|CASA1_BOVIN	117	133
KKYKVPQLEIVPNSAEERLH	0	0	0	0	0	0	sp|P02662|CASA1_BOVIN	117	136
KKYKVPQLEIVPNSAEERLH	0	1	0	0	0	0	sp|P02662|CASA1_BOVIN	117	136
KKYKVPQLEIVPNSAEERLHSM	0	1	0	0	0	0	sp|P02662|CASA1_BOVIN	117	138
KLTEEEKNRLN	0	0	0	0	0	0	sp|P02663|CASA2_BOVIN	167	177
KLTEEEKNRLN	0	0	0	0	0	1	sp|P02663|CASA2_BOVIN	167	177
KNMFPQPSFGPNP	0	0	1	0	0	0	tr|E1BN58|E1BN58_BOVIN	832	844
KPSSDLSVPGNPERSAQ	0	0	0	0	0	0	tr|Q1RMR9|Q1RMR9_BOVIN	340	356
KPTPEGDLEIL	0	0	0	0	0	0	sp|P02754|LACB_BOVIN	63	73
KPTPEGDLEILL	0	0	0	0	0	0	sp|P02754|LACB_BOVIN	63	74
KPVALINN	0	0	0	0	0	0	sp|P02668|CASK_BOVIN	67	74
KPVALINNQ	0	0	0	0	0	0	sp|P02668|CASK_BOVIN	67	75
KPVALINNQFLPYPY	0	0	0	0	0	0	sp|P02668|CASK_BOVIN	67	81
KPWIQPKTK	0	0	0	0	0	0	sp|P02663|CASA2_BOVIN	206	214
KPWIQPKTKVIPYVR	0	0	0	0	0	0	sp|P02663|CASA2_BOVIN	206	220
KPWIQPKTKVIPYVRY	0	0	0	0	0	0	sp|P02663|CASA2_BOVIN	206	221
KPWIQPKTKVIPYVRYL	0	0	0	0	0	0	sp|P02663|CASA2_BOVIN	206	222
KQEYDESGPSIVH	0	0	0	0	0	0	sp|P60712|ACTB_BOVIN	359	371
KTGEETEETSSSNLVK	0	0	0	0	0	0	sp|O02751|CFDP2_BOVIN	132	147
KTKLTEEEKNRLN	0	0	0	0	0	0	sp|P02663|CASA2_BOVIN	165	177
KTVDMESTEVFTKK	0	1	0	0	0	0	sp|P02663|CASA2_BOVIN	152	165
KVAALGSDPHIS	0	0	0	0	0	0	sp|P18892|BT1A1_BOVIN	140	151
KVAGTW	0	0	0	0	0	0	sp|P02754|LACB_BOVIN	30	35
KVGLEAHEEIHKE	0	0	0	0	0	0	sp|P28782|S10A8_BOVIN	77	89
KVKEAMAPKHKEMPFPKYPVEPF	0	0	0	0	0	0	sp|P02666|CASB_BOVIN	112	134
KVLPVPQ	0	0	0	0	0	0	sp|P02666|CASB_BOVIN	184	190
KVLPVPQ	0	0	0	0	0	1	sp|P02666|CASB_BOVIN	184	190
KVLPVPQK	0	0	0	0	0	0	sp|P02666|CASB_BOVIN	184	191
KVLPVPQK	0	0	0	0	0	1	sp|P02666|CASB_BOVIN	184	191
KVLPVPQKA	0	0	0	0	0	0	sp|P02666|CASB_BOVIN	184	192
KVLPVPQKAV	0	0	0	0	0	0	sp|P02666|CASB_BOVIN	184	193
KVLPVPQKAVP	0	0	0	0	0	0	sp|P02666|CASB_BOVIN	184	194
KVLPVPQKAVPY	0	0	0	0	0	0	sp|P02666|CASB_BOVIN	184	195
KVLPVPQKAVPYP	0	0	0	0	0	0	sp|P02666|CASB_BOVIN	184	196
KVLPVPQKAVPYPQ	0	0	0	0	0	0	sp|P02666|CASB_BOVIN	184	197
KVLPVPQKAVPYPQR	0	0	0	0	0	0	sp|P02666|CASB_BOVIN	184	198
KVLPVPQKAVPYPQRD	0	0	0	0	0	0	sp|P02666|CASB_BOVIN	184	199
KVLPVPQKAVPYPQRDM	0	0	0	0	0	0	sp|P02666|CASB_BOVIN	184	200
KVLPVPQKAVPYPQRDMP	0	0	0	0	0	0	sp|P02666|CASB_BOVIN	184	201
KVLPVPQKAVPYPQRDMPI	0	0	0	0	0	0	sp|P02666|CASB_BOVIN	184	202
KVLPVPQKAVPYPQRDMPIQ	0	0	1	0	0	0	sp|P02666|CASB_BOVIN	184	203
KVLPVPQKAVPYPQRDMPIQ	0	0	0	0	0	0	sp|P02666|CASB_BOVIN	184	203
KVLPVPQKAVPYPQRDMPIQ	0	0	0	0	0	1	sp|P02666|CASB_BOVIN	184	203
KVLPVPQKAVPYPQRDMPIQA	0	0	1	0	0	0	sp|P02666|CASB_BOVIN	184	204
KVLPVPQKAVPYPQRDMPIQA	0	0	0	0	0	0	sp|P02666|CASB_BOVIN	184	204
KVLPVPQKAVPYPQRDMPIQA	0	0	0	0	0	1	sp|P02666|CASB_BOVIN	184	204
KVLPVPQKAVPYPQRDMPIQAF	0	0	1	0	0	0	sp|P02666|CASB_BOVIN	184	205
KVLPVPQKAVPYPQRDMPIQAF	0	0	0	0	0	0	sp|P02666|CASB_BOVIN	184	205
KVLPVPQKAVPYPQRDMPIQAF	0	0	0	0	0	1	sp|P02666|CASB_BOVIN	184	205
KVLPVPQKAVPYPQRDMPIQAFL	0	0	0	0	0	1	sp|P02666|CASB_BOVIN	184	206
KVLPVPQKAVPYPQRDMPIQAFL	0	0	0	0	0	0	sp|P02666|CASB_BOVIN	184	206
KVLVLDTDYKKY	0	0	0	0	0	0	sp|P02754|LACB_BOVIN	107	118
KVPQLEIVPNSAEE	0	1	0	0	0	0	sp|P02662|CASA1_BOVIN	120	133
KVPQLEIVPNSAEE	0	0	0	0	0	0	sp|P02662|CASA1_BOVIN	120	133
KVPQLEIVPNSAEER	0	1	0	0	0	0	sp|P02662|CASA1_BOVIN	120	134
KVPQLEIVPNSAEERLH	0	0	0	0	0	0	sp|P02662|CASA1_BOVIN	120	136
KVPQLEIVPNSAEERLH	0	1	0	0	0	0	sp|P02662|CASA1_BOVIN	120	136
KVVQGEPSLK	0	0	0	0	0	0	sp|P81265|PIGR_BOVIN	455	464
KYKVPQLEIVPNSAEE	0	1	0	0	0	0	sp|P02662|CASA1_BOVIN	118	133
KYKVPQLEIVPNSAEER	0	1	0	0	0	0	sp|P02662|CASA1_BOVIN	118	134
KYKVPQLEIVPNSAEERLH	0	1	0	0	0	0	sp|P02662|CASA1_BOVIN	118	136
KYKVPQLEIVPNSAEERLH	0	0	0	0	0	0	sp|P02662|CASA1_BOVIN	118	136
KYKVPQLEIVPNSAEERLHSM	0	1	0	0	0	0	sp|P02662|CASA1_BOVIN	118	138
KYPVEPFTESQ	0	0	0	0	0	0	sp|P02666|CASB_BOVIN	128	138
KYPVEPFTESQS	0	0	0	0	0	0	sp|P02666|CASB_BOVIN	128	139
KYPVEPFTESQSLTLTDVENLHL	0	0	0	0	0	0	sp|P02666|CASB_BOVIN	128	150
KYPVEPFTESQSLTLTDVENLHLPL	0	0	0	0	0	0	sp|P02666|CASB_BOVIN	128	152
KYPVEPFTESQSLTLTDVENLHLPLP	0	0	0	0	0	0	sp|P02666|CASB_BOVIN	128	153
KYPVEPFTESQSLTLTDVENLHLPLP	0	0	0	0	0	1	sp|P02666|CASB_BOVIN	128	153
KYPVEPFTESQSLTLTDVENLHLPLPL	0	0	0	0	0	1	sp|P02666|CASB_BOVIN	128	154
KYPVEPFTESQSLTLTDVENLHLPLPLL	0	0	0	0	0	1	sp|P02666|CASB_BOVIN	128	155
KYPVEPFTESQSLTLTDVENLHLPLPLLQ	0	0	0	0	0	1	sp|P02666|CASB_BOVIN	128	156
KYPVEPFTESQSLTLTDVENLHLPLPLLQS	0	0	0	0	0	1	sp|P02666|CASB_BOVIN	128	157
KYPVEPFTESQSLTLTDVENLHLPLPLLQS	0	0	0	0	0	0	sp|P02666|CASB_BOVIN	128	157
KYPVEPFTESQSLTLTDVENLHLPLPLLQS	0	0	0	0	0	2	sp|P02666|CASB_BOVIN	128	157
KYPVEPFTESQSLTLTDVENLHLPLPLLQSW	0	0	0	0	0	0	sp|P02666|CASB_BOVIN	128	158
LAYFYPELFR	0	0	0	0	0	0	sp|P02662|CASA1_BOVIN	157	166
LAYFYPELFRQ	0	0	0	0	0	0	sp|P02662|CASA1_BOVIN	157	167
LAYFYPELFRQF	0	0	0	0	0	0	sp|P02662|CASA1_BOVIN	157	168
LDAYPSGAW	0	0	0	0	0	0	sp|P02662|CASA1_BOVIN	171	179
LDDDIIPEEDIISR	0	0	0	0	0	0	sp|Q2UVX4|CO3_BOVIN	749	762
LDDDLTDDIM	0	0	0	0	0	0	sp|P00711|LALBA_BOVIN	100	109
LDDDLTDDIM	0	0	1	0	0	0	sp|P00711|LALBA_BOVIN	100	109
LDEADEMLSR	0	0	0	0	0	0	sp|Q3SZ54|IF4A1_BOVIN	181	190
LDEYLSLQEQLTDVEKL	0	0	0	0	0	0	tr|F1MBL6|F1MBL6_BOVIN	2466	2482
LDGTRKPVTEAQ	0	0	0	0	0	0	sp|P24627|TRFL_BOVIN	593	604
LDIQKVAGTW	0	0	0	0	0	0	sp|P02754|LACB_BOVIN	26	35
LDIQKVAGTWYS	0	0	0	0	0	0	sp|P02754|LACB_BOVIN	26	37
LDKVGINY	0	0	0	0	0	0	sp|P00711|LALBA_BOVIN	115	122
LDPDTAHPH	0	0	0	0	0	0	sp|P18892|BT1A1_BOVIN	307	315
LDTDYKKY	0	0	0	0	0	0	sp|P02754|LACB_BOVIN	111	118
LEIVPNSAEER	0	1	0	0	0	0	sp|P02662|CASA1_BOVIN	124	134
LEIVPNSAEERLH	0	0	0	0	0	0	sp|P02662|CASA1_BOVIN	124	136
LEIVPNSAEERLH	0	1	0	0	0	0	sp|P02662|CASA1_BOVIN	124	136
LEKSYELPDGQVITIGNE	0	0	0	0	0	0	sp|P60712|ACTB_BOVIN	236	253
LELDQPPQDDEDPDSPKRVS	0	0	0	0	0	0	sp|P22226|CTHL1_BOVIN	58	77
LELDQPPQDDEDPDSPKRVSF	0	0	0	0	0	1	sp|P22226|CTHL1_BOVIN	58	78
LELDQPPQDDEDPDSPKRVSF	0	0	0	0	0	0	sp|P22226|CTHL1_BOVIN	58	78
LELYAREPDTSPELKSE	0	0	0	0	0	0	tr|E1BJP1|E1BJP1_BOVIN	133	149
LENTVKETIKY	0	0	0	0	0	0	sp|P80195|GLCM1_BOVIN	129	139
LEPEPELVYGDL	0	0	0	0	0	0	sp|P81265|PIGR_BOVIN	238	249
LEVEPSDTIENVK	0	0	0	0	0	0	sp|P63048|RL40_BOVIN	15	27
LFLEDNELEEVP	0	0	0	0	0	0	sp|O62702|KERA_BOVIN	126	137
LFRQFYQLDAYPSGAWYYVPLGTQYTDAPSFSDIPNPIGSEN	0	0	0	0	0	0	sp|P02662|CASA1_BOVIN	164	205
LFRQFYQLDAYPSGAWYYVPLGTQYTDAPSFSDIPNPIGSEN	0	0	0	0	0	1	sp|P02662|CASA1_BOVIN	164	205
LGDHQNPRLIKDLLQDLSSTLCIL	0	0	0	0	0	0	sp|Q1RMS8|FBX25_BOVIN	160	183
LGPVRGPFPI	0	0	0	0	0	0	sp|P02666|CASB_BOVIN	213	222
LGPVRGPFPIIV	0	0	0	0	0	0	sp|P02666|CASB_BOVIN	213	224
LGTQYTDAP	0	0	0	0	0	0	sp|P02662|CASA1_BOVIN	184	192
LGTQYTDAPSF	0	0	0	0	0	0	sp|P02662|CASA1_BOVIN	184	194
LGTQYTDAPSFS	0	0	0	0	0	0	sp|P02662|CASA1_BOVIN	184	195
LGTQYTDAPSFSD	0	0	0	0	0	0	sp|P02662|CASA1_BOVIN	184	196
LGTQYTDAPSFSDIPNPIG	0	0	0	0	0	0	sp|P02662|CASA1_BOVIN	184	202
LGTQYTDAPSFSDIPNPIGSE	0	0	0	0	0	0	sp|P02662|CASA1_BOVIN	184	204
LGTQYTDAPSFSDIPNPIGSE	0	0	0	0	0	1	sp|P02662|CASA1_BOVIN	184	204
LGTQYTDAPSFSDIPNPIGSEN	0	0	0	0	0	0	sp|P02662|CASA1_BOVIN	184	205
LGTQYTDAPSFSDIPNPIGSENSEK	0	0	0	0	0	0	sp|P02662|CASA1_BOVIN	184	208
LGTQYTDAPSFSDIPNPIGSENSEKT	0	0	0	0	0	0	sp|P02662|CASA1_BOVIN	184	209
LGTQYTDAPSFSDIPNPIGSENSEKTTMPL	0	0	0	0	0	0	sp|P02662|CASA1_BOVIN	184	213
LGTQYTDAPSFSDIPNPIGSENSEKTTMPL	0	0	0	0	0	1	sp|P02662|CASA1_BOVIN	184	213
LGTQYTDAPSFSDIPNPIGSENSEKTTMPLW	0	0	0	0	0	0	sp|P02662|CASA1_BOVIN	184	214
LGYLEQLLR	0	0	0	0	0	0	sp|P02662|CASA1_BOVIN	107	115
LGYLEQLLRL	0	0	0	0	0	0	sp|P02662|CASA1_BOVIN	107	116
LGYLEQLLRLKKYKVPQLEIVPNSAEE	0	1	0	0	0	0	sp|P02662|CASA1_BOVIN	107	133
LGYLEQLLRLKKYKVPQLEIVPNSAEERLH	0	1	0	0	0	0	sp|P02662|CASA1_BOVIN	107	136
LHLPLPLLQS	0	0	0	0	0	0	sp|P02666|CASB_BOVIN	148	157
LHLPLPLLQSW	0	0	0	0	0	0	sp|P02666|CASB_BOVIN	148	158
LKKYKVPQ	0	0	0	0	0	0	sp|P02662|CASA1_BOVIN	116	123
LKKYKVPQLEIVPNSAEE	0	1	0	0	0	0	sp|P02662|CASA1_BOVIN	116	133
LKKYKVPQLEIVPNSAEERLH	0	1	0	0	0	0	sp|P02662|CASA1_BOVIN	116	136
LKQLQPPPRGPRE	0	0	0	0	0	0	tr|F1N1W2|F1N1W2_BOVIN	74	86
LLSIEIPYSREDEFFS	0	1	0	0	0	0	sp|P80457|XDH_BOVIN	404	419
LLYQEPVLGPVR	0	0	0	0	0	0	sp|P02666|CASB_BOVIN	206	217
LLYQEPVLGPVRGPF	0	0	0	0	0	0	sp|P02666|CASB_BOVIN	206	220
LLYQEPVLGPVRGPFP	0	0	0	0	0	0	sp|P02666|CASB_BOVIN	206	221
LLYQEPVLGPVRGPFPI	0	0	0	0	0	0	sp|P02666|CASB_BOVIN	206	222
LLYQEPVLGPVRGPFPII	0	0	0	0	0	0	sp|P02666|CASB_BOVIN	206	223
LLYQEPVLGPVRGPFPII	0	0	0	0	0	1	sp|P02666|CASB_BOVIN	206	223
LLYQEPVLGPVRGPFPIIV	0	0	0	0	0	0	sp|P02666|CASB_BOVIN	206	224
LNDNDLAVTYF	0	0	0	0	0	0	sp|A5PKA5|SNX27_BOVIN	370	380
LNEINQFYQK	0	0	0	0	0	0	sp|P02663|CASA2_BOVIN	97	106
LNEINQFYQKFP	0	0	0	0	0	0	sp|P02663|CASA2_BOVIN	97	108
LNEINQFYQKFPQ	0	0	0	0	0	0	sp|P02663|CASA2_BOVIN	97	109
LNEINQFYQKFPQY	0	0	0	0	0	0	sp|P02663|CASA2_BOVIN	97	110
LNPWDQVK	0	0	0	0	0	0	sp|P02663|CASA2_BOVIN	121	128
LNPWDQVKR	0	0	0	0	0	0	sp|P02663|CASA2_BOVIN	121	129
LNPWDQVKRN	0	0	0	0	0	0	sp|P02663|CASA2_BOVIN	121	130
LNPWDQVKRNA	0	0	0	0	0	0	sp|P02663|CASA2_BOVIN	121	131
LPEKADRDQYEL	0	0	0	0	0	0	sp|P24627|TRFL_BOVIN	237	248
LPHCTGNNPGFCGDPGTPAHGS	0	0	0	0	0	0	tr|F1MRN5|F1MRN5_BOVIN	2397	2418
LPLPLL	0	0	0	0	0	0	sp|P02666|CASB_BOVIN	150	155
LPLPLLQSW	0	0	0	0	0	0	sp|P02666|CASB_BOVIN	150	158
LPQEVLNENLL	0	0	0	0	0	0	sp|P02662|CASA1_BOVIN	26	36
LPQEVLNENLLR	0	0	0	0	0	0	sp|P02662|CASA1_BOVIN	26	37
LPQEVLNENLLR	0	0	0	0	0	1	sp|P02662|CASA1_BOVIN	26	37
LPQEVLNENLLRF	0	0	0	0	0	0	sp|P02662|CASA1_BOVIN	26	38
LPQEVLNENLLRF	0	0	0	0	0	1	sp|P02662|CASA1_BOVIN	26	38
LPQNIPPLTQT	0	0	0	0	0	0	sp|P02666|CASB_BOVIN	85	95
LPQNIPPLTQTPVVVPPF	0	0	0	0	0	1	sp|P02666|CASB_BOVIN	85	102
LPQNIPPLTQTPVVVPPF	0	0	0	0	0	0	sp|P02666|CASB_BOVIN	85	102
LPQNIPPLTQTPVVVPPFLQP	0	0	0	0	0	0	sp|P02666|CASB_BOVIN	85	105
LPQNIPPLTQTPVVVPPFLQPEV	0	0	0	0	0	0	sp|P02666|CASB_BOVIN	85	107
LPQNIPPLTQTPVVVPPFLQPEVM	0	0	0	0	0	0	sp|P02666|CASB_BOVIN	85	108
LPQNIPPLTQTPVVVPPFLQPEVMGVS	0	0	0	0	0	0	sp|P02666|CASB_BOVIN	85	111
LPQNIPPLTQTPVVVPPFLQPEVMGVSK	0	0	0	0	0	0	sp|P02666|CASB_BOVIN	85	112
LPQNIPPLTQTPVVVPPFLQPEVMGVSKVKE	0	0	0	0	0	1	sp|P02666|CASB_BOVIN	85	115
LPQNIPPLTQTPVVVPPFLQPEVMGVSKVKE	0	0	0	0	0	0	sp|P02666|CASB_BOVIN	85	115
LPVPQKAVPY	0	0	0	0	0	0	sp|P02666|CASB_BOVIN	186	195
LPVPQKAVPYP	0	0	0	0	0	0	sp|P02666|CASB_BOVIN	186	196
LPVPQKAVPYPQ	0	0	0	0	0	0	sp|P02666|CASB_BOVIN	186	197
LPVPQKAVPYPQ	0	0	0	0	0	1	sp|P02666|CASB_BOVIN	186	197
LPVPQKAVPYPQR	0	0	0	0	0	0	sp|P02666|CASB_BOVIN	186	198
LPVPQKAVPYPQRD	0	0	0	0	0	0	sp|P02666|CASB_BOVIN	186	199
LPVPQKAVPYPQRDM	0	0	0	0	0	0	sp|P02666|CASB_BOVIN	186	200
LPVPQKAVPYPQRDMP	0	0	1	0	0	0	sp|P02666|CASB_BOVIN	186	201
LPVPQKAVPYPQRDMP	0	0	0	0	0	0	sp|P02666|CASB_BOVIN	186	201
LPVPQKAVPYPQRDMP	0	0	0	0	0	1	sp|P02666|CASB_BOVIN	186	201
LPVPQKAVPYPQRDMPI	0	0	0	0	0	0	sp|P02666|CASB_BOVIN	186	202
LPVPQKAVPYPQRDMPIQ	0	0	1	0	0	0	sp|P02666|CASB_BOVIN	186	203
LPVPQKAVPYPQRDMPIQ	0	0	0	0	0	0	sp|P02666|CASB_BOVIN	186	203
LPVPQKAVPYPQRDMPIQ	0	0	0	0	0	1	sp|P02666|CASB_BOVIN	186	203
LPVPQKAVPYPQRDMPIQA	0	0	0	0	0	1	sp|P02666|CASB_BOVIN	186	204
LPVPQKAVPYPQRDMPIQA	0	0	0	0	0	0	sp|P02666|CASB_BOVIN	186	204
LPVPQKAVPYPQRDMPIQAF	0	0	1	0	0	0	sp|P02666|CASB_BOVIN	186	205
LPVPQKAVPYPQRDMPIQAF	0	0	0	0	0	0	sp|P02666|CASB_BOVIN	186	205
LPYPYYAK	0	0	0	0	0	0	sp|P02668|CASK_BOVIN	77	84
LPYPYYAKP	0	0	0	0	0	0	sp|P02668|CASK_BOVIN	77	85
LPYPYYAKPA	0	0	0	0	0	0	sp|P02668|CASK_BOVIN	77	86
LPYPYYAKPAA	0	0	0	0	0	0	sp|P02668|CASK_BOVIN	77	87
LPYPYYAKPAAVR	0	0	0	0	0	0	sp|P02668|CASK_BOVIN	77	89
LPYPYYAKPAAVRSPA	0	0	0	0	0	0	sp|P02668|CASK_BOVIN	77	92
LPYPYYAKPAAVRSPAQ	0	0	0	0	0	0	sp|P02668|CASK_BOVIN	77	93
LQPEPIVGSKMHRMHDLFTIGS	0	0	1	0	0	0	tr|E1B779|E1B779_BOVIN	267	288
LQPEVMGVS	0	0	0	0	0	0	sp|P02666|CASB_BOVIN	103	111
LQPEVMGVSK	0	0	0	0	0	0	sp|P02666|CASB_BOVIN	103	112
LQPEVMGVSKVK	0	0	0	0	0	0	sp|P02666|CASB_BOVIN	103	114
LQPEVMGVSKVKE	0	0	0	0	0	0	sp|P02666|CASB_BOVIN	103	115
LQPEVMGVSKVKE	0	0	1	0	0	0	sp|P02666|CASB_BOVIN	103	115
LQPEVMGVSKVKEA	0	0	0	0	0	0	sp|P02666|CASB_BOVIN	103	116
LQPEVMGVSKVKEAMAPK	0	0	0	0	0	0	sp|P02666|CASB_BOVIN	103	120
LQPEVMGVSKVKEAMAPKH	0	0	0	0	0	0	sp|P02666|CASB_BOVIN	103	121
LQYLYQGPIVLNPWDQVKR	0	0	0	0	0	0	sp|P02663|CASA2_BOVIN	111	129
LRLKKYKVPQLEIVPNSAEERLH	0	1	0	0	0	0	sp|P02662|CASA1_BOVIN	114	136
LSKDIGSESTEDQ	0	1	0	0	0	0	sp|P02662|CASA1_BOVIN	55	67
LSLSQSKVLPVPQ	0	0	0	0	0	0	sp|P02666|CASB_BOVIN	178	190
LSLSQSKVLPVPQ	0	0	0	0	0	1	sp|P02666|CASB_BOVIN	178	190
LSLSQSKVLPVPQK	0	0	0	0	0	0	sp|P02666|CASB_BOVIN	178	191
LSLSQSKVLPVPQKAVPY	0	0	0	0	0	0	sp|P02666|CASB_BOVIN	178	195
LSLSQSKVLPVPQKAVPYP	0	0	0	0	0	0	sp|P02666|CASB_BOVIN	178	196
LSLSQSKVLPVPQKAVPYPQ	0	0	0	0	0	0	sp|P02666|CASB_BOVIN	178	197
LSLSQSKVLPVPQKAVPYPQRDMPIQ	0	0	0	0	0	0	sp|P02666|CASB_BOVIN	178	203
LSLSQSKVLPVPQKAVPYPQRDMPIQA	0	1	0	0	0	0	sp|P02666|CASB_BOVIN	178	204
LSLSQSKVLPVPQKAVPYPQRDMPIQA	0	0	1	0	0	0	sp|P02666|CASB_BOVIN	178	204
LSLSQSKVLPVPQKAVPYPQRDMPIQA	0	0	0	0	0	0	sp|P02666|CASB_BOVIN	178	204
LSLSQSKVLPVPQKAVPYPQRDMPIQA	0	0	0	0	0	1	sp|P02666|CASB_BOVIN	178	204
LSLSQSKVLPVPQKAVPYPQRDMPIQAF	0	0	0	0	0	1	sp|P02666|CASB_BOVIN	178	205
LSLSQSKVLPVPQKAVPYPQRDMPIQAF	0	0	0	0	0	0	sp|P02666|CASB_BOVIN	178	205
LSNTVPAK	0	0	0	0	0	1	sp|P02668|CASK_BOVIN	100	107
LSNTVPAKS	0	0	0	0	0	0	sp|P02668|CASK_BOVIN	100	108
LSQSKVLPVPQ	0	0	0	0	0	0	sp|P02666|CASB_BOVIN	180	190
LSQSKVLPVPQK	0	0	0	0	0	0	sp|P02666|CASB_BOVIN	180	191
LSQSKVLPVPQKAVPY	0	0	0	0	0	0	sp|P02666|CASB_BOVIN	180	195
LSQSKVLPVPQKAVPYP	0	0	0	0	0	0	sp|P02666|CASB_BOVIN	180	196
LSQSKVLPVPQKAVPYPQ	0	0	0	0	0	0	sp|P02666|CASB_BOVIN	180	197
LSQSKVLPVPQKAVPYPQR	0	0	0	0	0	0	sp|P02666|CASB_BOVIN	180	198
LSQSKVLPVPQKAVPYPQRD	0	0	0	0	0	0	sp|P02666|CASB_BOVIN	180	199
LSQSKVLPVPQKAVPYPQRDMP	0	0	0	0	0	0	sp|P02666|CASB_BOVIN	180	201
LSQSKVLPVPQKAVPYPQRDMPIQ	0	0	0	0	0	0	sp|P02666|CASB_BOVIN	180	203
LSQSKVLPVPQKAVPYPQRDMPIQA	0	0	1	0	0	0	sp|P02666|CASB_BOVIN	180	204
[truncated: 2,090 more rows]

## Sheet: Table S5 Stilton interior
Table S5. Peptide sequences identified in the interior of Stilton blue cheese.
[truncated: 2,999 more rows]

[truncated: 7 more sheets: Table S6 Stilton rind, Table S7 Casu Marzu all peptide, Table S8 Casu Marzu interior, Table S9 Casu Marzu rind, Table S10 Mimolette all peptide, Table S11 Mimolette interior, Table S12 Mimolette rind]
